# Supplementary material for: Altered profile of glycosylated proteins in serum samples obtained from patients with Hashimoto′s thyroiditis following depletion of highly abundant proteins
Source: Frontiers journal article supplement (doi:10.3389/fimmu.2023.1182842), 2023-06-30
Supplement: Data_Sheet_1.ZIP [file normalizing data of lectin microarrays.xlsx]

## Sheet: normalizing data
name	pvalue-U检验	Ratio	2259	2339	2480	2569	2602	2609	2610	2611	2612	2616	2620	2623	2628	2629	2630	2631	2635	2637	2639	2642	2644	2646	2647	2652	2656	2661	2662	3126	3104	3123	3115	3113	3103	3106	3105	3117	3112	3109	3120	3116	3101	3119	3122	3110	3107	3100	3102
MAA	4.66334e-08	0.362233	0.207297	0.263703	0.158154	0.446103	0.359315	0.26534	0.575732	0.790938	0.294454	0	0.199389	0.00838169	0	0.545884	0.0928433	0.427896	0.298302	0.045562	0	0.0363143	0.0254539	0.360418	0.282113	0.477608	0.105658	0.543041	0.48	0.510861	0.942418	0.211049	0.725983	1	1	0.939654	0.96066	0.957447	0.741218	0.837943	0.499248	1	0.563571	0.488932	0.469831	0.582386	0.678093	0.583564	0.612677
Calsepa	9.37362e-08	0.301124	0.186149	0.143453	0.24705	0.388489	0.176041	0.226111	0.324193	0.225755	0.185119	0.0407194	0.210072	0.0980618	0.289586	0	0.0868922	0.538765	0.543693	0.588699	0.044399	0	0.0234532	0.15734	0.085422	0.161739	0	0.209412	0.25954	0.546087	0.909312	0.157852	0.691689	1	1	0.797754	0.887787	0.936432	0.629496	0.532662	0.704501	0.949737	0.355545	0.9568	0.20532	0.659856	0.418849	0.516612	0.611792
SNA-I	1.53298e-05	0.448118	0.23235	0.403114	0.265527	0.228217	0.280384	0.14265	0.411081	0.378067	0.252681	0	0.283127	0.480335	0.330805	0.272909	0.332801	0.785187	0.609902	0.421042	0.120388	0.15891	0.525808	0.0470874	0.0626214	0.186893	0	0.132524	0.289806	0.583981	0.949397	0.0752427	0.696746	1	0.726318	0.685545	1	0.950289	0.669318	0.630225	0.706728	1	0.376452	0.827311	0.329126	0.455238	0.405145	0.544236	0.600536
SAMB	1.65961e-05	0.441134	0.356468	0.274973	0.167746	0.40176	0.399476	0.413828	0.5667	0.663797	0.383153	0.0532954	0.110109	0	0.14427	0.295361	0.210822	0.405156	0.352582	0.699393	0.109022	0	0.0214828	0.245742	0.173729	0.226295	0.0645294	0.241676	0.281808	0.413342	1	0.220166	0.338192	0.77559	0.85035	0.863716	0.622593	0.707075	0.618287	0.373704	0.609608	0.584764	0.514797	0.984224	0.179622	0.414724	0.247165	0.566171	0.684352
DSA	0.000104865	0.484921	0.113706	0.25601	0	0.369483	0.224844	0.328647	0.632351	0.578455	0.287933	0.0693705	0.167187	0	0.391655	0.857554	0.473957	0.461871	0.481151	0.248345	0.00749906	0.133602	0.0570747	0.268466	0.182602	0.385077	0.384327	0.40195	0.415073	0.482565	0.767575	0.142857	0.589353	0.706919	0.95354	0.561805	1	0.347338	0.986052	1	0.213813	1	0.724661	0.377266	0.530934	0.382455	0.428886	0.445531	0.601418
STL	0.000769216	0.535936	0.133447	0.205947	0.205315	0.391071	0.537448	0.355209	0.436936	0	0.124909	0.297691	0.319203	0.310156	0.249835	1	0.695109	0.320026	0.262777	0	0	0.39323	0.322999	0.210055	0.452479	0.088843	0.839532	0.374656	0.373967	0.699036	1	0.27686	0.21803	0.50522	0.862405	0.656014	0.964382	0.355999	1	0.684277	0.254222	0.603641	0.516711	0.396359	0.668733	0.701044	0.41316	0.611125	0.666016
BanLec	0.000770351	0.517013	0.352378	0.559062	0	0.522362	0.464979	0.415674	0.486883	0.437442	0.431831	0.451938	0.294952	0.130959	0.0852592	0	0.0721112	0.173472	0.331074	0.359224	0.360055	0.0832734	0.323224	0.473048	0.509675	0.150829	0	0.0720456	0.507084	0.471666	1	0.66586	0.17967	0.651383	0.897143	0.499292	0.979096	0.42757	0.0991056	0.638326	0.119259	0.62033	0.578746	0.244599	0.449032	1	0.622288	0.383776	0.607562
ACG	0.00807905	0.506416	0	0	0.436447	0.341801	0	0	0.0577367	0	0	0	0.583461	0	0.757143	0.554945	0.12967	0.284615	0.641758	0.965934	0.0273438	0	0	0.245312	0.321094	0.375781	0.294531	0.565625	0.4875	0.691406	0.451501	0.215625	0.043956	1	0.778291	1	0.879908	0.341758	0.0842266	0.194487	0.854945	0.347253	0.809469	1	0.40625	0.520674	0	0.0103926	0.545035
PHA-E	0.00986371	0.567213	0.194702	0.256472	0.70403	0.630658	0.405864	0.201646	0.802726	0.768348	0.252058	0	0.380037	0.286893	0.0676737	0.44291	0.0232535	0.305177	0.619199	0.312034	0.0110803	0.317854	0.378436	0.412188	0.234349	0.0936288	0	0.142936	0.365651	0.672022	0.76749	0.139612	0.214151	0.441687	0.781121	1	0.603909	0.215343	0.481452	0.609021	1	0.241777	0.376286	0	1	1	0.678143	0.458333	0.854681
PSA	0.0106421	0.505969	0	0.295292	0	0.44898	0	0	0	0.279601	0	0.239658	0	0.247212	0.953532	0.0855019	0.250929	0.60223	0	1	0.217848	0	0.268188	0.0997375	0	0.165354	0.023622	0.023622	0.12336	0.548556	0.704082	0.0183727	0.730483	0.774608	0.163265	0.357143	0	0.516729	0	0.74893	0.399628	0.552045	0	0.263941	0.304462	0.659058	0.543509	0	0.846939
MPL	0.0112489	0.606586	0.520284	0.100508	0.251777	0.302231	0.0456389	0.223124	0.36714	0.305584	0.376268	0.387817	0.308629	0	0.150972	0.139013	0.542601	0.41704	0.0762332	0.058296	0.393375	0.145178	0.563452	0.15735	0.465839	0.356108	0.310559	0.345756	0.409938	0.26294	0.675456	0.269151	0.218236	1	1	0.841785	0.482759	0.173393	0.742132	0.515736	1	0.251121	0.414807	0.255605	0.184265	0	0.445685	0.595335	0.374239
Gal1	0.0334412	0.403215																			0			0.146608	0.404814	0.122538	0.43326	0.0415755	0.223195	0.413567		0.295405													0.280088
VVA	0.0334733	1.67599	0.678061	0.536838	0.566181	0.515839	0.743628	1	0.641815	0.611569	0.5845	1	0.981001	0.894665	0.794907	0.856088	0.783002	0.533153	0.616637	0.187764	0.182464	0.417775	0.349588	0.633886	0.226303	0.721564	0.219194	0.890995	0.251185	1	0	0.268957	0.214888	0.518472	0.358037	0.296891	0.195521	1	0.00759975	0.279713	0.150542	0.706751	0.990276	0.890145	0.182464	0.466751	0	0.586857	0.404597
GS-I	0.0423571	0.265251	0	0	0	0	0	0	0	0	0	0	0	0	0.262248	0.0144092	0	0.00288184	0	0	0.0185759	0	0	0	0.00619195	0.0154799	0.0154799	0.0495356	0.0278638	0.241486	0	0.47678	0	0	0	0	0	0	0	0	0	0	0.319588	1	0.712074	0	0	0	0
PA-IIL	0.0778333	0.490075	0			0	0	0	0		0										0.0143885			0.0983213	0.00879297	0.0959233	0.0871303	0	0.0967226	0.478018	0	0.181455			0	0	0						0		0.14948			0	0
PSL1a	0.0811583	0.652055	0.398852	0.0317985	0.0302722	0.457198	0.186514	0.0545194	0.0674319	0.0180107	0.0234338	1	0.0100738	0.115693	0.230195	0	0.108658	0.172403	0.306602	0.279329	0.515075	0.00859832	0.000508776	0.299247	0.244242	0.450241	0.305051	0.429072	0.449676	0.693226	0	0.211408	0.609307	0.0167387	0.0961263	0	0	0.487446	0	0.0068176	0.744372	0.434632	0.693448	0.426515	0.117736	0.0278809	0	1	0.474892
HHA	0.146931	0.818844	0.640857	0.774281	0	0.69779	0.639383	0.623414	0.70819	0.815896	0.714039	0.89255	0.594418	0.440131	0.357084	0.169206	0.633088	0.486159	0.42154	0.750614	0.62604	0.416585	0.454143	1	0.741275	0.414726	0.289015	0	0.294942	0.355462	0.976708	0.480814	0.6181	0.662896	0.785593	1	0.780583	0.562735	0.490042	0.668306	0	0.901802	0.594274	0.453481	0.441245	1	0.8127	0.551606	0.671066
GNA	0.150653	0.745401	0.545967	0.61212	0	0.600449	0.607523	0.499836	0.623866	0.624198	0.57166	0.720008	0.426764	0.227231	0.418431	0	0.598783	0.459106	0.624605	0.585532	0.415409	0.335773	0.453209	1	0.444428	0.531994	0.241367	0	0.331399	0.0969965	0.997838	0.561811	0.501061	0.704708	0.887466	1	0.898765	0.996077	0.373091	0.60965	0.020297	1	0.635444	0.427119	0.119196	1	0.646878	0.554973	0.679625
SNA-II	0.155012	1.98571	0			0	0	0	0		0										1			0.384615	0.538462	0.384615	0.769231	0.692308	0.576923	0.730769	0	0.653846			0	0	0						0		0.5			0	0
ECA	0.167465	0.476965	0			0	0	0	0		0										0.174419			0.127907	0.0232558	0.162791	0.0697674	0.151163	0.337209	0.511628	0	1			0	0	0						0		0.988372			0	0
AAL	0.179053	0.678815	0	0	0	1	0	0	0	1	0	0	0	0	0.493878	0	0	0.220408	0	0.228571	0	0	0	0.580711	0.104569	0.0629442	0.144162	0.116751	0.225381	0.903553	0	0.455838	0	0	0.832335	0	0	0	0	0	1	0	0	0.840816	1	0	0	0	0
DBA	0.187685	2.4988	0	0	1	0.497771	0.231798	0.0468053	0	0	0	0	0	0	1	0	0	0	0	0	0.454861	0	0	1	0.375	0	0.295139	0.225694	0.423611	0.767361	0	0.190972	0	0	0	0	0	0	0	0	0	0	0	0	0.375	0	0	0	0
CGL2	0.193551	0.667848	0.00769231	0.433425	1	0.292308	0.451648	0.501099	0.0769231	0.338843	0.465934	0	0.264463	0.250441	0.301587	0.0676073	0.287478	0.110523	0.232804	0.0117578	0	0.576676	0.157025	0.243407	0.16033	0.357912	0.10978	0.534945	0.443187	0.555495	0.325275	0.182418	1	0.177227	0.0153846	0.357143	0	0.144033	0.44169	0.836547	0.114638	0.349794	1	0.124045	0.286703	0.764922	0.289256	0.173626	0.247253
Malectin	0.223225	1.69921	0			0	0	0	0		0			0	1	0	0	0	0	0	0.596154			0.346154	0.346154	0.826923	0.509615	0.701923	0.865385	0.625	0	0	0		0	0	0	0			0	0	0	0	0.711538			0	0
PNA	0.231037	0.803774	0			0	0	0	0		0										0.0572687			0.502203	0	0.0132159	0.123348	0.0132159	0.167401	1	0	0.189427			0	0	0						0		0.162996			0	0
WGA	0.231037	1.45825	0.0859729	0	0.0967742	0	0	0.334842	0.18552	0	0	0	0	1	0.226562	0.507812	0.453125	0.804688	0.921875	0	0.508621	0.854839	0.967742	1	0.543103	0.275862	0.543103	0	0.62931	0.258621	1	0.534483	0	0	0	0	0	0	0	0.741935	0	0	0	0.226562	0.181034	0.342742	1	0	0.266968
Lentil	0.235683	0.706682	0	0	0.019544	0.885965	0	0	0	0	0	0	0.127036	0	1	0.113806	0.016791	0.147388	0	0.416045	0.668142	0	0	0.323009	0.225664	0.389381	0.0840708	0.141593	0.278761	0.292035	0	0	0	1	0	0	0.864035	0.195896	0	0	0.391791	0.0223881	0	0.0354478	0.738938	0.421824	0.159609	0	0.921053
ASA	0.255091	0.832634	0.495894	0.997784	0.438612	0.683092	0.636127	0.67294	0.664397	1	0.576741	0.901409	0.79728	0.0494143	0.315154	0.141288	0.270498	0.361518	0.43204	0.66386	0.39851	0.661456	0.343529	1	0.667974	0.389684	0.25201	0.163561	0.517356	0.681114	1	0.571485	0.539776	0.869161	0.781767	0.979572	0.727374	0.720229	0.734814	0.450982	0	0.776354	0.507738	0.710957	0.470288	0.939504	0	0.363749	0.63588
SBA	0.275907	1.61905	0			0	0	0	0		0										0.194805			0.831169	1	0.298701	0.961039	0.597403	0.857143	0.922078	0	0.805195			0	0	0						0		0			0	0
GRFT	0.304471	0.773954	0.438301	0.157675	0.243829	0.612079	0.620192	0.459135	0.589143	0.593183	0.551382	0.335295	0	0.0357678	0.559598	0.0382345	0.318738	0.729275	0.464364	0.101489	0.37963	0.0978421	0.180562	0.915375	0.700474	0.477821	0.382429	0.214686	0.817399	0.403747	1	0.864341	0.0588494	0.0174922	0.869792	0.913762	0.949519	1	0.163561	0.284044	0	0.719937	0.360978	0.348163	0.131568	1	0.00302436	0.0286458	0.61228
Gal3	0.306093	0.45676																			0			0.148496	0.102775	0.246581	0.205158	0.487691	0.194216	0.675655		0.0797186													0.221962
Lotus	0.309533	1.09615	0			0	0	0	0		0										0.307692			0	0.461538	1	0.769231	0.538462	0.307692	0.692308	0	1			0	0	0						0		0.153846			0	0
NPA	0.317311	0.905203	0.642738	0.8237	0	0.727764	0.666969	0.650002	0.740047	0.756945	0.713999	0.824885	0.585253	0.201307	0.667272	0.182973	0.728626	0.680523	0.441096	0.876384	0.440736	0.527321	0.602633	1	0.694285	0.680284	0.389912	0	0.561757	0.289221	0.88515	0.342731	0.351243	0.809743	0.815705	1	0.864933	0.462153	0.643976	0.618697	0	1	0.761315	0.718824	0.0130418	1	0.958789	0.637337	0.781723
Gal1-S	0.332165	0.0576923																			0			0	0	0	0.0405405	0.027027	0.0540541	0.202703		0													1
Disconldin II	0.337873	0.719298	0			0	0	0	0		0										0.0492308			0	0.0307692	0.0246154	0.0953846	0.0676923	0.12	0.403077	0	0.0646154			0	0	0						0		0.0953846			0	0
ACL	0.359397	0.790558	0			0	0	0	0		0										0			0.445183	0.129568	0.225914	0.38206	0.245847	0.631229	0.408638	0	0.289037			0	0	0						0		0.295681			0	0
Gal9	0.369043	0.59122																			0			0.229567	0.0949519	0.403846	0.397837	0.395433	0.453125	0.46875		0.103365													0.128606
MOA	0.390107	1.06297	0			0	0	0	0		0										0.0171131			0	0.451637	0.552083	0.000744048	0.410714	0.218006	0.0119048	0	0.464286			0	0	0						0		0.0171131			0	0
GS-II	0.403422	1.60087	0			0	0	0	0		0										0.933884			0.933884	0.859504	0.619835	0.553719	0.520661	0.677686	0.876033	0	0.661157			0	0	0						0		0.421488			0	0
Jacalin	0.44096	1.31322	0			0	0	0	0		0			0	1	0	0	0.391813	0	0	0.148058			0.0946602	0.208738	0.300971	0.135922	0.665049	0.424757	0.43932	0	0.179612	0		0	0	0	0			0	0	0	0	0.325243			0	0
Gal7-S	0.453914	0.72	0			0	0	0	0		0										0.0833333			0.0833333	0.138889	0.333333	0.361111	0.222222	0.277778	1	0	0.222222			0	0	0						0		0.972222			0	0
Disconldin I	0.49103	0.818182	0			0	0	0	0		0										0			0.133333	0.0666667	0	0	0	0	0.2	0	0.1			0	0	0						0		0.116667			0	0
SJA	0.491362	0.904255	0			0	0	0	0		0										0.208791			0.0549451	0	0.153846	0.175824	0.186813	0.0879121	1	0	0.230769			0	0	0						0		0.175824			0	0
F17AG	0.504463	1.51546	0			0	0	0	0		0										0.777778			0.259259	0.481481	0.666667	0.296296	0.962963	1	0.888889	0	0.37037			0	0	0						0		0.518519			0	0
PTL	0.508422	0.949052	0.181818	0.503205	0.474359	0.181818	0.14956	0.13783	0.316716	0.836538	0.387097	0.807692	1	1	0.5	0.396341	0.512195	0.396341	0.128049	0.72561	0.217391	0.599359	0.858974	0	0.26087	0.608696	0.347826	0.652174	0.521739	0.391304	0.293255	0.521739	0.304878	0.522436	0.507331	0.55132	1	0.792683	0.61859	0.176282	0	0.54878	0.266862	0.914634	0.173913	0	0.788462	0.085044	0.378299
PALa	0.54909	0.760009	0	0	0	1	0	0	0	0	0	0	0								0.059293	0	1	0.108894	0.0541619	0.117446	0	0.0216648	0.0838084	0.321551	0	0.204675		0	0	0	0		0	0			0.348315		0.194413	0	0	0	0
WFA	0.54933	1.0625	0			0	0	0	0		0										0.529412			0	0.147059	0.558824	0.411765	0.5	0.352941	1	0	0.382353			0	0	0						0		0.176471			0	0
UDA	0.55288	1.31298	0			0	0	0	0		0										0.55814			0.418605	0.255814	0.488372	0.488372	0.348837	0.44186	0.511628	0	0.302326			0	0	0						0		0.255814			0	0
BPA	0.562795	2.39095	0			0	0	0	0		0										0.140625			0.460938	0.570312	0.546875	1	0.492188	0.328125	0.6875	0	0.125			0	0	0						0		0.242188			0	0
RS-Fuc	0.610739	0.568993	0			0	0	0	0		0										0.108067			0.687976	0.178082	0.242009	0.197869	0	0.278539	1	0	0.394216			0	0	0						0		0.736682			0	0
LcH	0.617937	0.782057	0	0	0	0.0654206	0	0	0	0	0	0	0	0.0936709	1	0.351899	0.0860759	0.346835	0.177215	0.324051	0.413462	0	0	0.15	0.0634615	0.0615385	0	0.101923	0.180769	0.238462	0	0.00192308	0.308861	0	0	0	0	0.301266	0	0	0.567089	0	0	0.303797	0.282692	1	0	0	0
LSL-N	0.618016	0.79913	0.000652742	0.518283	0.208267	0.23107	0.26893	0	0.579634	0.381558	0.0926893	0.238474	0.717011	0.391304	0.430575	0.628331	0.419355	0.701262	0.921459	0.323983	0	0.551669	1	0.202055	0.0136986	0.315068	0.35274	0.267123	0.35274	0.626712	0.503264	0.178082	0.293128	0.465819	0.511097	0.71671	1	0	0.216216	0.45151	1	0.516129	0.417102	0.426367	0.486301	0.252782	0.170111	0.110313	0.244778
LBA	0.621423	3.33374	0			0	0	0	0		0										1			0.554856	0.326439	0.489209	0.329137	0.338129	0.902878	0.359712	0	0.133094			0	0	0						0		0			0	0
VFA	0.697024	1.29333	0			0	0	0	0		0			0	0.583333	0	0	1	0	0	1			0.15625	0.125	0.28125	0.40625	0.5	0	1	0	0.65625	0		0	0	0	0			0	0	0	0	0.90625			0	0
Con A	0.719303	1.01805	0	0	0.968182	0.452297	0.219081	0	0	0	0	0	0	0.441134	0.809593	0.540698	0.124273	0.268169	0.387355	0.77907	0.0960162	0	0	0.0511983	0.0606909	0.022409	0	0.0357921	0.0746965	0.46981	0	0.228603	0	0	0	0	0	0.15407	0	0	1	0	0	0.0755814	0.57423	1	0	0	0
UEA-II	0.728665	1.35268	0	0	0	0	0	0	0	1	0	0.666667	0	0	0	0	0	0	0	0	0.258621	0	0	0.265517	0.244828	0.255172	0.282759	0.248276	0.358621	0	0	0.237931	0	0	0	0	0	0	0	0	0	0	0	0	0.272414	0	0	0	0
PHA-P	0.741822	0.657233	0			0	0	0	0		0										0.0625			0.301136	0.471591	0	0.210227	0.164773	0.164773	0.244318	0	0.204545			0	0	0						0		0.477273			0	0
BC2LCN	0.764511	0.943548	0			0	0	0	0		0										0.607143			0.178571	0.5	0.285714	0.678571	0.5	0.428571	0.964286	0	0.464286			0	0	0						0		0.464286			0	0
LEA	0.764511	0.952975	0			0	0	0	0		0			0	0.676923	0	0	0.723077	0	0.123077	0.0408163			0.459184	0.227891	0.234694	0.431973	0.323129	0.459184	0.646259	0	0.204082	0		0	0	0	0			0.646154	0	0	1	0			0	0
Orysata	0.775117	0.909087	0			0	0	0	0		0			0	0.0210526	0	0	0.494737	0	0.947368	0.03138			0.263138	0.103592	0.320983	0	0.015879	0.306238	0.220038	0	0.141021	0		0	0	0	0			0	0	0	1	0.215501			0	0
PA-IL	0.787463	0.838462	0			0	0	0	0		0										0			0.103448	0.137931	0.517241	0.793103	0.448276	0.758621	1	0	0.896552			0	0	0						0		0.448276			0	0
Gal2	0.833945	1.1133	0			0	0	0	0		0										0.234568			0	0.37037	0.395062	0.148148	0.320988	0.320988	0.209877	0	0.333333			0	0	0						0		0.0864198			0	0
PHA-L	0.833983	0.75788	0	0	0.748387	1	0.125628	0	0	0	0	0	0	0	0.227045	0.397329	0	0.124374	0.0914023	0.290484	0.306686	0	0	0.482558	0.331395	0.277616	0.0188953	0	0.190407	0.619186	0	0.399709	0.0596828	0	0	0	0	0.0471619	0	0	1	0.0680301	0	0.0367279	1	1	0	0	0
EEL	0.841177	1.65738	0	0	1	0	0	0	0	0	0	0	0	0	1	0	0	0	0	0	0	0	0	0.0563719	0.69089	0.698905	0.0288539	0.433075	0.276783	0.0582421	0	0.544216	0	0	0	0	0	0	0	0	0	0	0	0	0.00667913	0	0	0	0.48503
Gal3C-S	0.857392	0.956444	0.0205479	0.186317	0.062591	0.691781	0	0.0479452	0.705479	0.084425	0	0.298399	0.197962	0.266667	0.854545	0.957576	0.539394	0.787879	0.69697	0.751515	0	0.257642	0.302766	0.163328	0.246533	0.488444	0.288136	0.702619	0.399076	0.784284	0	0.115562	0	0.352256	0.568493	0	0	0.163636	1	0.186317	1	0	1	0.939394	0.186441	0	0.292576	0.253425	0.19863
UEA I	0.895823	0.723774	0	0.0316284	0	0.770592	0.150702	0	0.533252	1	0.267846	0.0835187	0	0.401384	0.208766	0.535179	0	0.0334487	0	0.0899654	0.00213371	0	0.0635038	0.793741	0.291607	0	0.116643	0.0462304	0.029872	0.74111	0.264185	0.33926	0	0.428218	1	0	0	0	0	0	0.7797	0	0.0115924	0.0553633	0.933144	0	0	0	0.102502
CNL	0.904644	1.31967	0			0	0	0	0		0										0.3			0.533333	0.266667	0.866667	0.633333	1	0.766667	0.9	0	0.7			0	0	0						0		0.433333			0	0
PPL	0.904666	1.81034	0			0	0	0	0		0										0.552632			1	0.947368	0.263158	0.289474	0.815789	0.657895	0.868421	0	0.131579			0	0	0						0		0.631579			0	0
AAA	0.938566	1.69065	0			0	0	0	0		0										1			0.385965	0.596491	0.350877	0.210526	0.22807	0.350877	0.842105	0	0.175439			0	0	0						0		0.333333			0	0
BC2L-A	0.964514	1.0085	0.105408	0.508796	0.138024	0.796909	0.650662	0.395143	0.710265	0.114118	0.789735	0.115471	0.128101	0	1	0	0.205966	0.548295	0.0397727	0.576705	0.300518	0	0.106901	0.816062	0.481865	0	0.0492228	0.0621762	0.373057	0.533679	0.35596	0.57772	0	0.198015	1	0.212472	0.573951	0.511364	0	0.082995	0	0.0667614	0.474614	0.00426136	0.313472	1	0	0	0.591611
[truncated: 6 more columns]
