# Supplementary material for: Altered profile of glycosylated proteins in serum samples obtained from patients with Hashimoto′s thyroiditis following depletion of highly abundant proteins
Source: Frontiers journal article supplement (doi:10.3389/fimmu.2023.1182842), 2023-06-30
Supplement: Data_Sheet_1.ZIP [file original data of lectin microarrays.xlsx]

## Sheet: lectin microarray 1
Sample Name	Block	Column	Row	Name	ID	F532 Median	F532 Mean	B532 Median	B532 Mean	B532 SD	F532 Median - B532	SNR 532	Flags
2259	1	1	1	POS1	POS1	19745	16016	1030	1028	43	18715	348.558	0
2259	1	2	1	POS1	POS1	21612	18165	994	962	133	20618	129.346	0
2259	1	3	1	POS2	POS2	2667	3158	994	983	68	1673	31.985	0
2259	1	4	1	POS2	POS2	2719	3699	974	928	127	1745	21.819	0
2259	1	5	1	NEG	NEG	97	342	949	930	87	-852	-6.759	0
2259	1	6	1	NEG	NEG	66	261	846	833	96	-780	-5.958	0
2259	1	7	1	NEG	NEG	85	298	893	870	109	-808	-5.248	0
2259	1	8	1	NEG	NEG	84	310	980	980	62	-896	-10.806	0
2259	1	9	1	AAA	AAA	514	555	1022	993	216	-508	-2.028	0
2259	1	10	1	AAA	AAA	553	559	1045	1033	79	-492	-6	0
2259	1	11	1	AAL	AAL	584	616	1047	1031	78	-463	-5.321	0
2259	1	12	1	AAL	AAL	677	704	1074	1074	51	-397	-7.255	0
2259	1	1	2	ACG	ACG	747	766	1007	1009	63	-260	-3.857	0
2259	1	2	2	ACG	ACG	714	709	978	949	123	-264	-1.951	0
2259	1	3	2	ACL	ACL	340	411	1004	8591	20042	-664	-0.408	0
2259	1	4	2	ACL	ACL	364	419	998	993	53	-634	-10.83	0
2259	1	5	2	ASA	ASA	6219	5602	967	950	88	5252	52.864	0
2259	1	6	2	ASA	ASA	7704	6556	867	861	72	6837	79.097	0
2259	1	7	2	BANLEC	BANLEC	2904	2843	917	922	68	1987	28.25	0
2259	1	8	2	BANLEC	BANLEC	3761	3593	993	990	50	2768	52.06	0
2259	1	9	2	BC2L-A	BC2L-A	1080	1050	1023	1021	61	57	0.475	0
2259	1	10	2	BC2L-A	BC2L-A	1165	1074	1029	1019	87	136	0.632	0
2259	1	11	2	BC2LCN	BC2LCN	834	825	1034	1023	153	-200	-1.294	0
2259	1	12	2	BC2LCN	BC2LCN	908	914	1067	1070	55	-159	-2.836	0
2259	1	1	3	BPA; BPL	BPA; BPL	605	623	1005	1006	70	-400	-5.471	0
2259	1	2	3	BPA; BPL	BPA; BPL	629	619	974	941	122	-345	-2.639	0
2259	1	3	3	CALSEPA	CALSEPA	1716	4047	989	3396	11738	727	0.055	0
2259	1	4	3	CALSEPA	CALSEPA	2526	4013	963	962	51	1563	59.824	0
2259	1	5	3	CGL2	CGL2	900	892	962	943	92	-62	-0.554	0
2259	1	6	3	CGL2	CGL2	974	1207	903	902	60	71	5.083	0
2259	1	7	3	CNL	CNL	584	578	909	911	72	-325	-4.625	0
2259	1	8	3	CNL	CNL	566	619	972	974	83	-406	-4.277	0
2259	1	9	3	Con A	Con A	996	992	1011	1006	65	-15	-0.215	0
2259	1	10	3	Con A	Con A	904	907	1026	1017	81	-122	-1.358	0
2259	1	11	3	DBA	DBA	974	1041	1024	1020	95	-50	0.221	0
2259	1	12	3	DBA	DBA	1069	1108	1057	1056	49	12	1.061	0
2259	1	1	4	DISCOIDIN I	DISCOIDIN I	222	335	1000	1006	64	-778	-10.484	0
2259	1	2	4	DISCOIDIN I	DISCOIDIN I	188	296	965	937	119	-777	-5.387	0
2259	1	3	4	DISCOIDIN II	DISCOIDIN II	404	460	971	967	77	-567	-6.584	0
2259	1	4	4	DISCOIDIN II	DISCOIDIN II	333	406	973	971	46	-640	-12.283	0
2259	1	5	4	DSA	DSA	1956	1991	934	907	102	1022	10.627	0
2259	1	6	4	DSA	DSA	1618	1626	859	858	52	759	14.769	0
2259	1	7	4	ECA	ECA	451	471	899	896	46	-448	-9.239	0
2259	1	8	4	ECA	ECA	538	4759	946	950	64	-408	59.516	0
2259	1	9	4	EEL	EEL	428	527	991	986	52	-563	-8.827	0
2259	1	10	4	EEL	EEL	441	517	1019	1006	77	-578	-6.351	0
2259	1	11	4	F17AG	F17AG	461	498	1005	995	82	-544	-6.061	0
2259	1	12	4	F17AG	F17AG	647	681	1019	1019	51	-372	-6.627	0
2259	1	1	5	GAL1	GAL1	183	449	977	984	65	-794	-8.231	0
2259	1	2	5	GAL1	GAL1	176	335	943	915	110	-767	-5.273	0
2259	1	3	5	GAL1-S	GAL1-S	139	259	947	937	63	-808	-10.762	0
2259	1	4	5	GAL1-S	GAL1-S	133	231	953	951	49	-820	-14.694	0
2259	1	5	5	GAL2	GAL2	592	570	947	930	78	-355	-4.615	0
2259	1	6	5	GAL2	GAL2	529	530	829	812	94	-300	-3	0
2259	1	7	5	GAL3	GAL3	131	310	906	904	250	-775	-2.376	0
2259	1	8	5	GAL3	GAL3	184	364	953	938	107	-769	-5.364	0
2259	1	9	5	GAL3C-S	GAL3C-S	967	971	983	982	64	-16	-0.172	0
2259	1	10	5	GAL3C-S	GAL3C-S	1022	1021	1001	999	117	21	0.188	0
2259	1	11	5	GAL7-S	GAL7-S	826	815	972	960	117	-146	-1.239	0
2259	1	12	5	GAL7-S	GAL7-S	794	779	971	946	103	-177	-1.621	0
2259	1	1	6	GAL9	GAL9	167	298	945	948	63	-778	-10.317	0
2259	1	2	6	GAL9	GAL9	165	277	930	913	132	-765	-4.818	0
2259	1	3	6	GNA	GNA	17518	18476	901	893	62	16617	283.597	0
2259	1	4	6	GNA	GNA	17813	18132	880	882	118	16933	146.186	0
2259	1	5	6	GRFT	GRFT	2976	4134	848	799	143	2128	23.322	0
2259	1	6	6	GRFT	GRFT	3068	4704	675	654	131	2393	30.916	0
2259	1	7	6	GS-I;?GSL-I	GS-I;?GSL-I	786	765	902	901	68	-116	-2	0
2259	1	8	6	GS-I;?GSL-I	GS-I;?GSL-I	755	758	946	944	47	-191	-3.957	0
2259	1	9	6	GS-II; GSL-II	GS-II; GSL-II	459	564	955	954	47	-496	-8.298	0
2259	1	10	6	GS-II; GSL-II	GS-II; GSL-II	431	533	978	966	87	-547	-4.977	0
2259	1	11	6	HHA; HHL	HHA; HHL	13625	11942	968	959	97	12657	113.227	0
2259	1	12	6	HHA; HHL	HHA; HHL	13662	12252	970	965	75	12692	150.493	0
2259	1	1	7	Jacalin	Jacalin	565	610	885	885	44	-320	-6.25	0
2259	1	2	7	Jacalin	Jacalin	536	563	855	830	101	-319	-2.644	0
2259	1	3	7	LBA	LBA	436	437	855	853	86	-419	-4.837	0
2259	1	4	7	LBA	LBA	374	379	828	801	110	-454	-3.836	0
2259	1	5	7	LcH A	LcH A	458	487	468	479	194	-10	0.041	0
2259	1	6	7	LcH A	LcH A	384	410	398	425	200	-14	-0.075	0
2259	1	7	7	LEA	LEA	523	555	860	864	223	-337	-1.386	0
2259	1	8	7	LEA	LEA	696	705	944	942	77	-248	-3.078	0
2259	1	9	7	LENTIL	LENTIL	744	777	961	951	106	-217	-1.642	0
2259	1	10	7	LENTIL	LENTIL	727	780	967	958	86	-240	-2.07	0
2259	1	11	7	Lotus	Lotus	604	586	954	951	99	-350	-3.687	0
2259	1	12	7	Lotus	Lotus	648	649	962	957	58	-314	-5.31	0
2259	1	1	8	LSL-N	LSL-N	974	1003	918	917	38	56	2.263	0
2259	1	2	8	LSL-N	LSL-N	826	822	879	852	105	-53	-0.286	0
2259	1	3	8	MAA; MAL	MAA; MAL	2057	1902	878	870	59	1179	17.492	0
2259	1	4	8	MAA; MAL	MAA; MAL	2026	1900	858	853	49	1168	21.367	0
2259	1	5	8	MALECTIN	MALECTIN	503	537	674	655	136	-171	-0.868	0
2259	1	6	8	MALECTIN	MALECTIN	403	388	528	462	189	-125	-0.392	0
2259	1	7	8	MOA	MOA	385	445	798	800	65	-413	-5.462	0
2259	1	8	8	MOA	MOA	374	442	864	865	57	-490	-7.421	0
2259	1	9	8	MPL; MPA	MPL; MPA	1052	1060	902	879	132	150	1.371	0
2259	1	10	8	MPL; MPA	MPL; MPA	1343	1268	923	909	132	420	2.72	0
2259	1	11	8	NPA	NPA	7594	7197	907	896	84	6687	75.012	0
2259	1	12	8	NPA	NPA	7765	7240	933	938	80	6832	78.775	0
2259	1	1	9	ORYSATA	ORYSATA	662	662	941	941	39	-279	-7.154	0
2259	1	2	9	ORYSATA	ORYSATA	553	515	900	869	116	-347	-3.052	0
2259	1	3	9	PA-IIL	PA-IIL	356	461	901	893	61	-545	-7.082	0
2259	1	4	9	PA-IIL	PA-IIL	387	467	867	857	66	-480	-5.909	0
2259	1	5	9	PA-IL	PA-IL	477	458	795	782	78	-318	-4.154	0
2259	1	6	9	PA-IL	PA-IL	460	471	765	754	73	-305	-3.877	0
2259	1	7	9	PALa	PALa	631	1313	822	826	62	-191	7.855	0
2259	1	8	9	PALa	PALa	767	1190	830	832	83	-63	4.313	0
2259	1	9	9	PHA-E	PHA-E	1347	1345	854	852	43	493	11.465	0
2259	1	10	9	PHA-E	PHA-E	1575	1543	863	851	62	712	11.161	0
2259	1	11	9	PHA-L	PHA-L	577	604	850	839	68	-273	-3.456	0
2259	1	12	9	PHA-L	PHA-L	616	650	853	851	55	-237	-3.655	0
2259	1	1	10	PHA-P	PHA-P	735	758	933	932	39	-198	-4.462	0
2259	1	2	10	PHA-P	PHA-P	760	709	897	869	120	-137	-1.333	0
2259	1	3	10	PNA	PNA	479	513	907	899	64	-428	-6.031	0
2259	1	4	10	PNA	PNA	468	504	881	876	50	-413	-7.44	0
2259	1	5	10	PPL	PPL	618	633	813	800	72	-195	-2.319	0
2259	1	6	10	PPL	PPL	612	634	836	835	41	-224	-4.902	0
2259	1	7	10	PSA/PEA	PSA/PEA	696	723	874	872	41	-178	-3.634	0
2259	1	8	10	PSA/PEA	PSA/PEA	739	747	896	892	43	-157	-3.372	0
2259	1	9	10	PSL1A	PSL1A	1013	2687	911	908	47	102	37.851	0
2259	1	10	10	PSL1A	PSL1A	1648	3735	914	899	71	734	39.944	0
2259	1	11	10	PTL	PTL	872	860	899	884	71	-27	-0.338	0
2259	1	12	10	PTL	PTL	1035	1042	905	904	54	130	2.556	0
2259	1	1	11	RS-FUC	RS-FUC	723	606	950	950	36	-227	-9.556	0
2259	1	2	11	RS-FUC	RS-FUC	587	541	915	886	111	-328	-3.108	0
2259	1	3	11	SAMB	SAMB	8190	8298	911	904	65	7279	113.754	0
2259	1	4	11	SAMB	SAMB	8730	8465	908	909	53	7822	142.566	0
2259	1	5	11	SBA	SBA	383	477	832	817	71	-449	-4.789	0
2259	1	6	11	SBA	SBA	422	498	849	848	43	-427	-8.14	0
2259	1	7	11	SJA	SJA	519	494	888	886	42	-369	-9.333	0
2259	1	8	11	SJA	SJA	559	566	900	897	39	-341	-8.487	0
2259	1	9	11	SNA-I	SNA-I	1686	1642	911	906	53	775	13.887	0
2259	1	10	11	SNA-I	SNA-I	2349	2116	928	914	67	1421	17.94	0
2259	1	11	11	SNA-II	SNA-II	692	686	914	899	72	-222	-2.958	0
2259	1	12	11	SNA-II	SNA-II	883	855	934	931	50	-51	-1.52	0
2259	1	1	12	STL	STL	1390	1399	956	957	42	434	10.524	0
2259	1	2	12	STL	STL	1230	1182	920	893	117	310	2.47	0
2259	1	3	12	UDA	UDA	620	592	912	904	64	-292	-4.875	0
2259	1	4	12	UDA	UDA	677	670	906	906	58	-229	-4.069	0
2259	1	5	12	UEA I	UEA I	871	862	845	832	76	26	0.395	0
2259	1	6	12	UEA I	UEA I	711	719	847	851	176	-136	-0.75	0
2259	1	7	12	UEA-II	UEA-II	784	795	886	887	41	-102	-2.244	0
2259	1	8	12	UEA-II	UEA-II	770	786	897	897	41	-127	-2.707	0
2259	1	9	12	VFA	VFA	761	759	922	925	75	-161	-2.213	0
2259	1	10	12	VFA	VFA	795	805	924	910	78	-129	-1.346	0
2259	1	11	12	VVA	VVA	7738	7917	934	921	96	6804	72.875	0
2259	1	12	12	VVA	VVA	8169	7561	947	947	44	7222	150.318	0
2259	1	1	13	WFA	WFA	597	645	960	961	73	-363	-4.329	0
2259	1	2	13	WFA	WFA	384	455	932	907	110	-548	-4.109	0
2259	1	3	13	WGA	WGA	911	896	922	914	59	-11	-0.305	0
2259	1	4	13	WGA	WGA	944	931	912	912	39	32	0.487	0
2259	1	5	13	NEG	NEG	91	243	858	842	83	-767	-7.217	0
2259	1	6	13	NEG	NEG	72	207	836	835	41	-764	-15.317	0
2259	1	7	13	NEG	NEG	239	375	876	869	83	-637	-5.952	0
2259	1	8	13	NEG	NEG	287	426	886	876	92	-599	-4.891	0
2259	1	9	13	POS2	POS2	6430	6596	915	911	46	5515	123.587	0
2259	1	10	13	POS2	POS2	7723	7006	924	918	130	6799	46.831	0
2259	1	11	13	POS1	POS1	21136	18071	944	943	114	20192	150.246	0
2259	1	12	13	POS1	POS1	23364	20337	958	955	48	22406	403.792	0
3100	2	1	1	POS1	POS1	17086	13389	1779	1770	110	15307	105.627	0
3100	2	2	1	POS1	POS1	19733	16334	1843	1841	64	17890	226.453	0
3100	2	3	1	POS2	POS2	2467	3044	1843	1831	94	624	12.904	0
3100	2	4	1	POS2	POS2	2906	3679	1879	1870	103	1027	17.563	0
3100	2	5	1	NEG	NEG	277	817	1850	1799	222	-1573	-4.423	0
3100	2	6	1	NEG	NEG	178	604	1815	1807	83	-1637	-14.494	0
3100	2	7	1	NEG	NEG	130	443	1664	1623	225	-1534	-5.244	0
3100	2	8	1	NEG	NEG	205	517	1845	1581	521	-1640	-2.042	0
3100	2	9	1	AAA	AAA	1359	1389	1939	1808	357	-580	-1.174	0
3100	2	10	1	AAA	AAA	1408	1480	2073	2072	87	-665	-6.805	0
3100	2	11	1	AAL	AAL	1567	1573	2139	2113	128	-572	-4.219	0
3100	2	12	1	AAL	AAL	1869	1856	2228	2207	138	-359	-2.543	0
3100	2	1	2	ACG	ACG	1826	1788	1765	1772	123	61	0.13	0
3100	2	2	2	ACG	ACG	1742	1731	1792	1791	67	-50	-0.896	0
3100	2	3	2	ACL	ACL	911	982	1796	1777	110	-885	-7.227	0
3100	2	4	2	ACL	ACL	1118	1103	1837	1827	264	-719	-2.742	0
3100	2	5	2	ASA	ASA	4966	5710	1827	1783	184	3139	21.342	0
3100	2	6	2	ASA	ASA	7574	6835	1826	1831	72	5748	69.5	0
3100	2	7	2	BANLEC	BANLEC	3951	4075	1742	1735	118	2209	19.831	0
3100	2	8	2	BANLEC	BANLEC	4834	4885	1911	1889	143	2923	20.951	0
3100	2	9	2	BC2L-A	BC2L-A	1639	1557	1923	1863	234	-284	-1.308	0
3100	2	10	2	BC2L-A	BC2L-A	1744	1637	1988	1985	80	-244	-4.35	0
3100	2	11	2	BC2LCN	BC2LCN	1742	1709	2092	2092	162	-350	-2.364	0
3100	2	12	2	BC2LCN	BC2LCN	1723	1702	2188	2213	237	-465	-2.156	0
3100	2	1	3	BPA; BPL	BPA; BPL	1012	1032	1648	1655	134	-636	-4.649	0
3100	2	2	3	BPA; BPL	BPA; BPL	1194	1229	1734	1755	160	-540	-3.287	0
3100	2	3	3	CALSEPA	CALSEPA	4340	7858	1718	1706	106	2622	58.038	0
3100	2	4	3	CALSEPA	CALSEPA	4977	6834	1778	1765	100	3199	50.69	0
3100	2	5	3	CGL2	CGL2	1765	2028	1770	1726	174	-5	1.736	0
3100	2	6	3	CGL2	CGL2	1957	3220	1792	1795	67	165	21.269	0
3100	2	7	3	CNL	CNL	1092	1049	1725	1718	116	-633	-5.767	0
3100	2	8	3	CNL	CNL	1148	1154	1878	1851	170	-730	-4.1	0
3100	2	9	3	Con A	Con A	990	1119	1924	1890	165	-934	-4.673	0
3100	2	10	3	Con A	Con A	1026	1125	1914	1903	121	-888	-6.43	0
3100	2	11	3	DBA	DBA	1166	1334	1968	1915	206	-802	-2.82	0
3100	2	12	3	DBA	DBA	1273	1480	2088	2072	125	-815	-4.736	0
3100	2	1	4	DISCOIDIN I	DISCOIDIN I	414	557	1606	1602	75	-1192	-13.933	0
3100	2	2	4	DISCOIDIN I	DISCOIDIN I	384	501	1660	1682	330	-1276	-3.579	0
3100	2	3	4	DISCOIDIN II	DISCOIDIN II	1071	1122	1645	1620	127	-574	-3.921	0
3100	2	4	4	DISCOIDIN II	DISCOIDIN II	896	982	1705	1685	110	-809	-6.391	0
3100	2	5	4	DSA	DSA	4355	4063	1687	1647	187	2668	12.92	0
3100	2	6	4	DSA	DSA	3525	3391	1698	1698	73	1827	23.192	0
3100	2	7	4	ECA	ECA	773	793	1661	1637	118	-888	-7.153	0
3100	2	8	4	ECA	ECA	878	918	1813	1800	123	-935	-7.171	0
3100	2	9	4	EEL	EEL	1772	1812	1887	1855	277	-115	-0.155	0
3100	2	10	4	EEL	EEL	1785	1820	1900	1889	90	-115	-0.767	0
3100	2	11	4	F17AG	F17AG	1262	1318	1943	1924	110	-681	-5.509	0
3100	2	12	4	F17AG	F17AG	1407	1444	1995	1981	141	-588	-3.809	0
3100	2	1	5	GAL1	GAL1	229	556	1562	1555	77	-1333	-12.974	0
3100	2	2	5	GAL1	GAL1	406	657	1628	1618	218	-1222	-4.408	0
3100	2	3	5	GAL1-S	GAL1-S	175	439	1684	1681	186	-1509	-6.677	0
3100	2	4	5	GAL1-S	GAL1-S	352	593	1704	1722	161	-1352	-7.012	0
3100	2	5	5	GAL2	GAL2	1048	1009	1675	1641	189	-627	-3.344	0
3100	2	6	5	GAL2	GAL2	1251	1249	1653	1647	78	-402	-5.103	0
3100	2	7	5	GAL3	GAL3	277	600	1583	1551	184	-1306	-5.168	0
3100	2	8	5	GAL3	GAL3	348	678	1773	1764	191	-1425	-5.686	0
3100	2	9	5	GAL3C-S	GAL3C-S	1839	1857	1819	1769	211	20	0.417	0
3100	2	10	5	GAL3C-S	GAL3C-S	1907	1902	1888	1880	76	19	0.289	0
3100	2	11	5	GAL7-S	GAL7-S	1731	1685	1920	1903	96	-189	-2.271	0
3100	2	12	5	GAL7-S	GAL7-S	1834	1756	1958	1942	119	-124	-1.563	0
3100	2	1	6	GAL9	GAL9	309	532	1508	1510	112	-1199	-8.732	0
3100	2	2	6	GAL9	GAL9	505	702	1593	1614	130	-1088	-7.015	0
3100	2	3	6	GNA	GNA	17441	17638	1606	1612	165	15835	97.127	0
3100	2	4	6	GNA	GNA	19927	19062	1662	1687	189	18265	91.931	0
3100	2	5	6	GRFT	GRFT	1727	4002	1661	1649	188	66	12.516	0
3100	2	6	6	GRFT	GRFT	1970	4275	1605	1614	108	365	24.639	0
3100	2	7	6	GS-I;?GSL-I	GS-I;?GSL-I	1301	1279	1534	1526	135	-233	-1.83	0
3100	2	8	6	GS-I;?GSL-I	GS-I;?GSL-I	1534	1525	1716	1711	163	-182	-1.141	0
3100	2	9	6	GS-II; GSL-II	GS-II; GSL-II	661	851	1778	1719	211	-1117	-4.114	0
3100	2	10	6	GS-II; GSL-II	GS-II; GSL-II	664	794	1866	1864	79	-1202	-13.544	0
3100	2	11	6	HHA; HHL	HHA; HHL	12816	11148	1877	1859	93	10939	99.882	0
3100	2	12	6	HHA; HHL	HHA; HHL	12818	11561	1918	1910	90	10900	107.233	0
3100	2	1	7	Jacalin	Jacalin	855	918	1432	1428	83	-577	-6.145	0
3100	2	2	7	Jacalin	Jacalin	955	1022	1506	1526	109	-551	-4.624	0
3100	2	3	7	LBA	LBA	659	668	1480	1478	99	-821	-8.182	0
3100	2	4	7	LBA	LBA	758	759	1516	1507	181	-758	-4.133	0
3100	2	5	7	LcH A	LcH A	1243	1297	1503	1485	182	-260	-1.033	0
3100	2	6	7	LcH A	LcH A	1157	1208	1427	1418	195	-270	-1.077	0
3100	2	7	7	LEA	LEA	1282	1288	1450	1457	149	-168	-1.134	0
3100	2	8	7	LEA	LEA	1447	1456	1653	1646	123	-206	-1.545	0
3100	2	9	7	LENTIL	LENTIL	1509	1571	1717	1675	179	-208	-0.581	0
3100	2	10	7	LENTIL	LENTIL	1626	1658	1800	1793	85	-174	-1.588	0
3100	2	11	7	Lotus	Lotus	1331	1279	1848	1832	105	-517	-5.267	0
3100	2	12	7	Lotus	Lotus	1453	1396	1881	1866	100	-428	-4.7	0
3100	2	1	8	LSL-N	LSL-N	1427	1347	1436	1434	80	-9	-1.087	0
3100	2	2	8	LSL-N	LSL-N	1682	1696	1502	1508	94	180	2	0
3100	2	3	8	MAA; MAL	MAA; MAL	4851	4532	1512	1511	86	3339	35.128	0
3100	2	4	8	MAA; MAL	MAA; MAL	4638	4357	1546	1547	119	3092	23.613	0
3100	2	5	8	MALECTIN	MALECTIN	1384	1358	1473	1454	166	-89	-0.578	0
3100	2	6	8	MALECTIN	MALECTIN	978	986	1231	1187	222	-253	-0.905	0
3100	2	7	8	MOA	MOA	715	822	1357	1351	98	-642	-5.398	0
3100	2	8	8	MOA	MOA	727	982	1539	1538	80	-812	-6.95	0
3100	2	9	8	MPL; MPA	MPL; MPA	2030	1947	1614	1575	162	416	2.296	0
3100	2	10	8	MPL; MPA	MPL; MPA	1918	1919	1690	1685	81	228	2.889	0
3100	2	11	8	NPA	NPA	8370	7410	1749	1744	121	6621	46.826	0
3100	2	12	8	NPA	NPA	8514	7392	1729	1719	130	6785	43.638	0
3100	2	1	9	ORYSATA	ORYSATA	1214	1087	1450	1443	71	-236	-5.014	0
3100	2	2	9	ORYSATA	ORYSATA	1191	1093	1491	1497	74	-300	-5.459	0
3100	2	3	9	PA-IIL	PA-IIL	682	777	1502	1507	183	-820	-3.989	0
3100	2	4	9	PA-IIL	PA-IIL	528	690	1536	1528	88	-1008	-9.523	0
3100	2	5	9	PA-IL	PA-IL	1028	925	1475	1447	144	-447	-3.625	0
3100	2	6	9	PA-IL	PA-IL	1147	1012	1405	1398	89	-258	-4.337	0
3100	2	7	9	PALa	PALa	785	1571	1477	1481	149	-692	0.604	0
3100	2	8	9	PALa	PALa	764	1581	1523	1524	84	-759	0.679	0
3100	2	9	9	PHA-E	PHA-E	2441	2319	1533	1419	275	908	3.273	0
3100	2	10	9	PHA-E	PHA-E	2909	2915	1587	1581	131	1322	10.183	0
3100	2	11	9	PHA-L	PHA-L	1127	1175	1625	1614	89	-498	-4.933	0
3100	2	12	9	PHA-L	PHA-L	1294	1319	1668	1657	113	-374	-2.991	0
3100	2	1	10	PHA-P	PHA-P	1296	1299	1444	1433	78	-148	-1.718	0
3100	2	2	10	PHA-P	PHA-P	1428	1419	1480	1471	84	-52	-0.619	0
3100	2	3	10	PNA	PNA	886	904	1485	1474	84	-599	-6.786	0
3100	2	4	10	PNA	PNA	977	983	1533	1526	113	-556	-4.805	0
3100	2	5	10	PPL	PPL	1096	1115	1465	1432	147	-369	-2.156	0
3100	2	6	10	PPL	PPL	1082	1131	1457	1458	83	-375	-3.94	0
3100	2	7	10	PSA/PEA	PSA/PEA	1336	1429	1518	1498	107	-182	-0.645	0
3100	2	8	10	PSA/PEA	PSA/PEA	1427	1467	1585	1588	76	-158	-1.592	0
3100	2	9	10	PSL1A	PSL1A	1772	5739	1618	1569	191	154	21.832	0
3100	2	10	10	PSL1A	PSL1A	3629	7574	1690	1691	126	1939	46.69	0
3100	2	11	10	PTL	PTL	1689	1732	1726	1712	96	-37	0.208	0
3100	2	12	10	PTL	PTL	1891	1895	1784	1780	113	107	1.018	0
3100	2	1	11	RS-FUC	RS-FUC	1024	901	1402	1359	143	-378	-3.203	0
3100	2	2	11	RS-FUC	RS-FUC	789	843	1469	1472	72	-680	-8.736	0
3100	2	3	11	SAMB	SAMB	12938	11691	1484	1482	116	11454	88.009	0
3100	2	4	11	SAMB	SAMB	13903	13258	1533	1539	178	12370	65.837	0
3100	2	5	11	SBA	SBA	544	728	1467	1431	149	-923	-4.718	0
3100	2	6	11	SBA	SBA	618	766	1471	1469	214	-853	-3.285	0
3100	2	7	11	SJA	SJA	1071	987	1524	1507	98	-453	-5.306	0
3100	2	8	11	SJA	SJA	1233	1114	1593	1593	109	-360	-4.394	0
3100	2	9	11	SNA-I	SNA-I	2902	10209	1639	1601	169	1263	50.935	0
3100	2	10	11	SNA-I	SNA-I	5418	4979	1693	1659	178	3725	18.652	0
3100	2	11	11	SNA-II	SNA-II	1318	1345	1741	1728	101	-423	-3.792	0
3100	2	12	11	SNA-II	SNA-II	1434	1463	1805	1812	275	-371	-1.269	0
3100	2	1	12	STL	STL	2849	2818	1423	1416	69	1426	20.319	0
3100	2	2	12	STL	STL	2754	2630	1478	1478	92	1276	12.522	0
3100	2	3	12	UDA	UDA	1102	1098	1461	1448	96	-359	-3.646	0
3100	2	4	12	UDA	UDA	1087	1084	1483	1467	103	-396	-3.718	0
3100	2	5	12	UEA I	UEA I	1330	1346	1445	1415	147	-115	-0.469	0
3100	2	6	12	UEA I	UEA I	1379	1373	1443	1433	87	-64	-0.69	0
3100	2	7	12	UEA-II	UEA-II	1392	1397	1521	1505	105	-129	-1.029	0
3100	2	8	12	UEA-II	UEA-II	1363	1402	1588	1585	83	-225	-2.205	0
3100	2	9	12	VFA	VFA	1448	1437	1640	1617	174	-192	-1.034	0
3100	2	10	12	VFA	VFA	1463	1470	1684	1675	88	-221	-2.33	0
3100	2	11	12	VVA	VVA	8361	7880	1730	1718	108	6631	57.056	0
3100	2	12	12	VVA	VVA	8586	8459	1810	1801	104	6776	64.019	0
3100	2	1	13	WFA	WFA	593	774	1415	1410	88	-822	-7.227	0
3100	2	2	13	WFA	WFA	616	805	1463	1467	74	-847	-8.946	0
3100	2	3	13	WGA	WGA	1359	1362	1468	1457	78	-109	-1.218	0
3100	2	4	13	WGA	WGA	1432	1436	1473	1439	158	-41	-0.019	0
3100	2	5	13	NEG	NEG	187	477	1418	1360	174	-1231	-5.075	0
3100	2	6	13	NEG	NEG	156	367	1348	1240	287	-1192	-3.042	0
3100	2	7	13	NEG	NEG	397	536	1494	1480	182	-1097	-5.187	0
3100	2	8	13	NEG	NEG	443	552	1575	1574	54	-1132	-18.926	0
3100	2	9	13	POS2	POS2	6779	6251	1613	1566	173	5166	27.081	0
3100	2	10	13	POS2	POS2	7684	6740	1679	1678	90	6005	56.244	0
3100	2	11	13	POS1	POS1	20968	19214	1726	1716	107	19242	163.533	0
3100	2	12	13	POS1	POS1	22822	20732	1798	1792	99	21024	191.313	0
2569	3	1	1	POS1	POS1	18813	14715	622	637	434	18191	32.438	0
2569	3	2	1	POS1	POS1	21232	16457	592	573	87	20640	182.575	0
2569	3	3	1	POS2	POS2	2530	2882	614	611	40	1916	56.775	0
2569	3	4	1	POS2	POS2	2629	3448	610	614	46	2019	61.609	0
2569	3	5	1	NEG	NEG	87	274	581	574	49	-494	-6.122	0
2569	3	6	1	NEG	NEG	75	275	538	542	58	-463	-4.603	0
2569	3	7	1	NEG	NEG	170	288	527	528	46	-357	-5.217	0
2569	3	8	1	NEG	NEG	144	285	579	577	37	-435	-7.892	0
2569	3	9	1	AAA	AAA	359	403	605	605	33	-246	-6.121	0
2569	3	10	1	AAA	AAA	399	433	608	602	51	-209	-3.314	0
2569	3	11	1	AAL	AAL	777	764	605	596	50	172	3.36	0
2569	3	12	1	AAL	AAL	760	759	596	597	39	164	4.154	0
2569	3	1	2	ACG	ACG	777	750	624	630	163	153	0.736	0
2569	3	2	2	ACG	ACG	743	713	598	581	78	145	1.692	0
2569	3	3	2	ACL	ACL	237	292	615	613	49	-378	-6.551	0
2569	3	4	2	ACL	ACL	267	293	611	610	34	-344	-9.324	0
2569	3	5	2	ASA	ASA	7901	6848	589	582	53	7312	118.226	0
2569	3	6	2	ASA	ASA	9862	8193	549	551	46	9313	166.13	0
2569	3	7	2	BANLEC	BANLEC	3734	3701	541	544	56	3193	56.375	0
2569	3	8	2	BANLEC	BANLEC	4188	3600	585	585	36	3603	83.75	0
2569	3	9	2	BC2L-A	BC2L-A	1266	1181	601	599	38	665	15.316	0
2569	3	10	2	BC2L-A	BC2L-A	1389	1262	608	601	47	781	14.064	0
2569	3	11	2	BC2LCN	BC2LCN	525	519	611	605	56	-86	-1.536	0
2569	3	12	2	BC2LCN	BC2LCN	551	545	601	603	196	-50	-0.296	0
2569	3	1	3	BPA; BPL	BPA; BPL	471	480	629	641	267	-158	-0.603	0
2569	3	2	3	BPA; BPL	BPA; BPL	430	444	619	605	87	-189	-1.851	0
2569	3	3	3	CALSEPA	CALSEPA	1765	4482	617	618	122	1148	31.672	0
2569	3	4	3	CALSEPA	CALSEPA	3908	5255	604	616	128	3304	36.242	0
2569	3	5	3	CGL2	CGL2	718	871	588	584	59	130	4.864	0
2569	3	6	3	CGL2	CGL2	682	1071	544	545	38	138	13.842	0
2569	3	7	3	CNL	CNL	494	414	521	524	70	-27	-1.571	0
2569	3	8	3	CNL	CNL	520	433	564	564	32	-44	-4.094	0
2569	3	9	3	Con A	Con A	813	774	594	592	32	219	5.688	0
2569	3	10	3	Con A	Con A	897	845	602	596	50	295	4.98	0
2569	3	11	3	DBA	DBA	891	880	610	607	57	281	4.789	0
2569	3	12	3	DBA	DBA	1002	988	611	610	36	391	10.5	0
2569	3	1	4	DISCOIDIN I	DISCOIDIN I	164	279	631	639	61	-467	-5.902	0
2569	3	2	4	DISCOIDIN I	DISCOIDIN I	265	304	631	627	257	-366	-1.257	0
2569	3	3	4	DISCOIDIN II	DISCOIDIN II	313	373	634	639	59	-321	-4.508	0
2569	3	4	4	DISCOIDIN II	DISCOIDIN II	314	375	597	598	45	-283	-4.956	0
2569	3	5	4	DSA	DSA	2564	2281	571	564	51	1993	33.667	0
2569	3	6	4	DSA	DSA	2400	2120	520	524	46	1880	34.696	0
2569	3	7	4	ECA	ECA	443	2119	504	507	36	-61	44.778	0
2569	3	8	4	ECA	ECA	362	389	561	563	48	-199	-3.625	0
2569	3	9	4	EEL	EEL	307	361	585	588	37	-278	-6.135	0
2569	3	10	4	EEL	EEL	319	364	592	587	45	-273	-4.956	0
2569	3	11	4	F17AG	F17AG	454	461	599	593	46	-145	-2.87	0
2569	3	12	4	F17AG	F17AG	463	480	605	604	45	-142	-2.756	0
2569	3	1	5	GAL1	GAL1	81	250	618	627	56	-537	-6.732	0
2569	3	2	5	GAL1	GAL1	65	204	619	607	86	-554	-4.686	0
2569	3	3	5	GAL1-S	GAL1-S	122	185	605	607	49	-483	-8.612	0
2569	3	4	5	GAL1-S	GAL1-S	118	188	588	592	47	-470	-8.596	0
2569	3	5	5	GAL2	GAL2	358	397	560	561	64	-202	-2.562	0
2569	3	6	5	GAL2	GAL2	336	345	520	519	36	-184	-4.833	0
2569	3	7	5	GAL3	GAL3	53	118	515	521	48	-462	-8.396	0
2569	3	8	5	GAL3	GAL3	59	136	545	528	71	-486	-5.521	0
2569	3	9	5	GAL3C-S	GAL3C-S	642	647	580	585	51	62	1.216	0
2569	3	10	5	GAL3C-S	GAL3C-S	625	624	584	576	46	41	1.043	0
2569	3	11	5	GAL7-S	GAL7-S	578	573	590	588	53	-12	-0.283	0
2569	3	12	5	GAL7-S	GAL7-S	571	554	590	588	41	-19	-0.829	0
2569	3	1	6	GAL9	GAL9	151	221	572	573	34	-421	-10.353	0
2569	3	2	6	GAL9	GAL9	121	202	569	558	81	-448	-4.395	0
2569	3	3	6	GNA	GNA	19452	18044	558	578	463	18894	37.724	0
2569	3	4	6	GNA	GNA	18525	16704	542	553	145	17983	111.386	0
2569	3	5	6	GRFT	GRFT	3617	5294	536	532	57	3081	83.544	0
2569	3	6	6	GRFT	GRFT	3662	5764	487	490	40	3175	131.85	0
2569	3	7	6	GS-I;?GSL-I	GS-I;?GSL-I	464	449	488	488	37	-24	-1.054	0
2569	3	8	6	GS-I;?GSL-I	GS-I;?GSL-I	475	474	532	537	67	-57	-0.94	0
2569	3	9	6	GS-II; GSL-II	GS-II; GSL-II	358	425	571	580	64	-213	-2.422	0
2569	3	10	6	GS-II; GSL-II	GS-II; GSL-II	374	409	576	573	52	-202	-3.154	0
2569	3	11	6	HHA; HHL	HHA; HHL	14460	11321	576	573	55	13884	195.418	0
2569	3	12	6	HHA; HHL	HHA; HHL	14291	11279	587	584	40	13704	267.375	0
2569	3	1	7	Jacalin	Jacalin	476	502	531	533	32	-55	-0.969	0
2569	3	2	7	Jacalin	Jacalin	437	463	515	506	84	-78	-0.512	0
2569	3	3	7	LBA	LBA	414	431	505	503	36	-91	-2	0
2569	3	4	7	LBA	LBA	372	392	490	493	34	-118	-2.971	0
2569	3	5	7	LcH A	LcH A	458	490	458	455	43	0	0.814	0
2569	3	6	7	LcH A	LcH A	460	511	444	447	36	16	1.778	0
2569	3	7	7	LEA	LEA	340	348	480	480	38	-140	-3.474	0
2569	3	8	7	LEA	LEA	384	388	517	517	31	-133	-4.161	0
2569	3	9	7	LENTIL	LENTIL	632	693	535	535	64	97	2.469	0
2569	3	10	7	LENTIL	LENTIL	667	692	560	557	47	107	2.872	0
2569	3	11	7	Lotus	Lotus	344	343	561	561	61	-217	-3.574	0
2569	3	12	7	Lotus	Lotus	403	405	569	565	49	-166	-3.265	0
2569	3	1	8	LSL-N	LSL-N	860	832	573	574	31	287	8.323	0
2569	3	2	8	LSL-N	LSL-N	620	645	551	540	114	69	0.921	0
2569	3	3	8	MAA; MAL	MAA; MAL	3042	2587	541	542	52	2501	39.327	0
2569	3	4	8	MAA; MAL	MAA; MAL	2962	2578	524	525	36	2438	57.028	0
2569	3	5	8	MALECTIN	MALECTIN	436	452	449	447	45	-13	0.111	0
2569	3	6	8	MALECTIN	MALECTIN	377	372	404	405	30	-27	-1.1	0
2569	3	7	8	MOA	MOA	261	308	459	460	32	-198	-4.75	0
2569	3	8	8	MOA	MOA	267	325	484	483	35	-217	-4.514	0
2569	3	9	8	MPL; MPA	MPL; MPA	738	712	518	525	224	220	0.835	0
2569	3	10	8	MPL; MPA	MPL; MPA	671	652	536	526	55	135	2.291	0
2569	3	11	8	NPA	NPA	8765	7372	556	556	62	8209	109.935	0
2569	3	12	8	NPA	NPA	7642	6437	553	550	36	7089	163.528	0
2569	3	1	9	ORYSATA	ORYSATA	524	505	589	626	881	-65	-0.137	0
2569	3	2	9	ORYSATA	ORYSATA	420	404	554	531	81	-134	-1.568	0
2569	3	3	9	PA-IIL	PA-IIL	349	374	565	562	42	-216	-4.476	0
2569	3	4	9	PA-IIL	PA-IIL	256	316	545	676	1659	-289	-0.217	0
2569	3	5	9	PA-IL	PA-IL	301	305	495	492	44	-194	-4.25	0
2569	3	6	9	PA-IL	PA-IL	316	314	474	472	48	-158	-3.292	0
2569	3	7	9	PALa	PALa	462	1572	509	509	49	-47	21.694	0
2569	3	8	9	PALa	PALa	651	1154	513	512	45	138	14.267	0
2569	3	9	9	PHA-E	PHA-E	1793	1731	517	517	36	1276	33.722	0
2569	3	10	9	PHA-E	PHA-E	2141	2047	517	510	60	1624	25.617	0
2569	3	11	9	PHA-L	PHA-L	687	693	530	528	46	157	3.587	0
2569	3	12	9	PHA-L	PHA-L	774	787	531	528	41	243	6.317	0
2569	3	1	10	PHA-P	PHA-P	507	519	597	607	243	-90	-0.362	0
2569	3	2	10	PHA-P	PHA-P	540	485	582	561	83	-42	-0.916	0
2569	3	3	10	PNA	PNA	335	365	574	577	177	-239	-1.198	0
2569	3	4	10	PNA	PNA	353	379	561	560	32	-208	-5.656	0
2569	3	5	10	PPL	PPL	415	424	505	500	43	-90	-1.767	0
2569	3	6	10	PPL	PPL	390	400	525	526	34	-135	-3.706	0
2569	3	7	10	PSA/PEA	PSA/PEA	601	669	564	564	32	37	3.281	0
2569	3	8	10	PSA/PEA	PSA/PEA	631	660	578	577	32	53	2.594	0
2569	3	9	10	PSL1A	PSL1A	764	2561	597	599	58	167	33.828	0
2569	3	10	10	PSL1A	PSL1A	1378	3263	587	584	54	791	49.611	0
2569	3	11	10	PTL	PTL	615	619	592	1030	4810	23	-0.085	0
2569	3	12	10	PTL	PTL	677	656	597	601	187	80	0.294	0
2569	3	1	11	RS-FUC	RS-FUC	601	547	602	606	47	-1	-1.255	0
2569	3	2	11	RS-FUC	RS-FUC	543	479	596	582	72	-53	-1.431	0
2569	3	3	11	SAMB	SAMB	9019	8433	594	597	125	8425	62.688	0
2569	3	4	11	SAMB	SAMB	9143	8836	583	596	131	8560	62.901	0
2569	3	5	11	SBA	SBA	265	321	516	513	53	-251	-3.623	0
2569	3	6	11	SBA	SBA	283	338	540	540	35	-257	-5.771	0
2569	3	7	11	SJA	SJA	394	410	580	577	46	-186	-3.63	0
2569	3	8	11	SJA	SJA	443	448	593	590	59	-150	-2.407	0
2569	3	9	11	SNA-I	SNA-I	773	879	613	614	33	160	8.03	0
2569	3	10	11	SNA-I	SNA-I	2609	2487	610	603	51	1999	36.941	0
2569	3	11	11	SNA-II	SNA-II	479	482	611	603	50	-132	-2.42	0
2569	3	12	11	SNA-II	SNA-II	520	525	619	614	42	-99	-2.119	0
2569	3	1	12	STL	STL	1633	1588	604	605	31	1029	31.71	0
2569	3	2	12	STL	STL	1366	1241	595	582	77	771	8.558	0
2569	3	3	12	UDA	UDA	426	413	591	587	128	-165	-1.359	0
2569	3	4	12	UDA	UDA	404	403	587	586	36	-183	-5.083	0
2569	3	5	12	UEA I	UEA I	1058	1017	538	533	55	520	8.8	0
2569	3	6	12	UEA I	UEA I	1280	1218	535	538	48	745	14.167	0
2569	3	7	12	UEA-II	UEA-II	526	519	579	593	254	-53	-0.291	0
2569	3	8	12	UEA-II	UEA-II	518	524	595	594	34	-77	-2.059	0
2569	3	9	12	VFA	VFA	515	515	617	613	35	-102	-2.8	0
2569	3	10	12	VFA	VFA	634	633	626	616	51	8	0.333	0
2569	3	11	12	VVA	VVA	6884	6804	624	615	50	6260	123.78	0
2569	3	12	12	VVA	VVA	7306	7032	641	641	53	6665	120.585	0
2569	3	1	13	WFA	WFA	279	367	606	604	37	-327	-6.405	0
2569	3	2	13	WFA	WFA	276	347	599	584	72	-323	-3.292	0
2569	3	3	13	WGA	WGA	550	540	601	599	36	-51	-1.639	0
2569	3	4	13	WGA	WGA	557	554	600	598	35	-43	-1.257	0
2569	3	5	13	NEG	NEG	82	197	558	556	37	-476	-9.703	0
2569	3	6	13	NEG	NEG	56	166	515	513	82	-459	-4.232	0
2569	3	7	13	NEG	NEG	117	195	584	584	35	-467	-11.114	0
2569	3	8	13	NEG	NEG	145	223	600	597	40	-455	-9.35	0
2569	3	9	13	POS2	POS2	6691	6364	616	615	34	6075	169.088	0
2569	3	10	13	POS2	POS2	7879	7044	625	615	48	7254	133.938	0
2569	3	11	13	POS1	POS1	23048	19348	643	647	81	22405	230.877	0
2569	3	12	13	POS1	POS1	24909	21740	649	646	45	24260	468.756	0
3101	4	1	1	POS1	POS1	16880	13646	825	824	54	16055	237.444	0
3101	4	2	1	POS1	POS1	19155	15167	821	816	55	18334	260.927	0
3101	4	3	1	POS2	POS2	2423	2682	861	862	52	1562	35	0
3101	4	4	1	POS2	POS2	2462	3108	978	967	79	1484	27.101	0
3101	4	5	1	NEG	NEG	109	396	1039	1016	108	-930	-5.741	0
3101	4	6	1	NEG	NEG	109	490	1102	1098	52	-993	-11.692	0
3101	4	7	1	NEG	NEG	151	542	1083	1075	75	-932	-7.107	0
3101	4	8	1	NEG	NEG	227	497	1225	1222	56	-998	-12.946	0
3101	4	9	1	AAA	AAA	839	889	1254	1211	147	-415	-2.19	0
3101	4	10	1	AAA	AAA	882	934	1283	1282	54	-401	-6.444	0
3101	4	11	1	AAL	AAL	1051	1062	1261	1252	70	-210	-2.714	0
3101	4	12	1	AAL	AAL	1154	1166	1306	1298	65	-152	-2.031	0
3101	4	1	2	ACG	ACG	1411	1367	959	954	79	452	5.228	0
3101	4	2	2	ACG	ACG	1166	1116	915	916	51	251	3.922	0
3101	4	3	2	ACL	ACL	515	541	877	874	55	-362	-6.055	0
3101	4	4	2	ACL	ACL	604	602	920	914	112	-316	-2.786	0
3101	4	5	2	ASA	ASA	6513	6376	988	970	115	5525	47.009	0
3101	4	6	2	ASA	ASA	7912	7470	1061	1058	111	6851	57.766	0
3101	4	7	2	BANLEC	BANLEC	4232	4273	1066	1057	80	3166	40.2	0
3101	4	8	2	BANLEC	BANLEC	5539	5318	1232	1233	48	4307	85.104	0
3101	4	9	2	BC2L-A	BC2L-A	1667	1601	1244	1204	151	423	2.629	0
3101	4	10	2	BC2L-A	BC2L-A	1766	1663	1327	1328	45	439	7.444	0
3101	4	11	2	BC2LCN	BC2LCN	1208	1206	1320	1304	85	-112	-1.153	0
3101	4	12	2	BC2LCN	BC2LCN	1193	1180	1311	1310	64	-118	-2.031	0
3101	4	1	3	BPA; BPL	BPA; BPL	676	687	1021	1019	57	-345	-5.825	0
3101	4	2	3	BPA; BPL	BPA; BPL	719	733	1018	1028	90	-299	-3.278	0
3101	4	3	3	CALSEPA	CALSEPA	2623	6465	958	956	67	1665	82.224	0
3101	4	4	3	CALSEPA	CALSEPA	3367	6901	932	924	58	2435	103.052	0
3101	4	5	3	CGL2	CGL2	1250	1907	932	918	99	318	9.99	0
3101	4	6	3	CGL2	CGL2	1604	2884	1010	1008	60	594	31.267	0
3101	4	7	3	CNL	CNL	921	736	1021	1017	89	-100	-3.157	0
3101	4	8	3	CNL	CNL	978	838	1206	1203	55	-228	-6.636	0
3101	4	9	3	Con A	Con A	912	965	1280	1241	137	-368	-2.015	0
3101	4	10	3	Con A	Con A	1263	1258	1321	1321	76	-58	-0.829	0
3101	4	11	3	DBA	DBA	1145	1185	1341	1333	101	-196	-1.465	0
3101	4	12	3	DBA	DBA	1113	1180	1351	1346	83	-238	-2	0
3101	4	1	4	DISCOIDIN I	DISCOIDIN I	299	370	1037	1033	80	-738	-8.287	0
3101	4	2	4	DISCOIDIN I	DISCOIDIN I	311	395	1067	1073	59	-756	-11.492	0
3101	4	3	4	DISCOIDIN II	DISCOIDIN II	741	775	1042	1038	71	-301	-3.704	0
3101	4	4	4	DISCOIDIN II	DISCOIDIN II	577	630	988	991	209	-411	-1.727	0
3101	4	5	4	DSA	DSA	4362	3954	926	944	955	3436	3.152	0
3101	4	6	4	DSA	DSA	4299	3761	957	955	66	3342	42.515	0
3101	4	7	4	ECA	ECA	564	660	976	977	185	-412	-1.714	0
3101	4	8	4	ECA	ECA	633	642	1149	1350	2152	-516	-0.329	0
3101	4	9	4	EEL	EEL	1161	1185	1237	1201	177	-76	-0.09	0
3101	4	10	4	EEL	EEL	1218	1220	1314	1314	71	-96	-1.324	0
3101	4	11	4	F17AG	F17AG	731	765	1337	1325	84	-606	-6.667	0
3101	4	12	4	F17AG	F17AG	1018	1043	1365	1357	69	-347	-4.551	0
3101	4	1	5	GAL1	GAL1	140	317	1054	1047	52	-914	-14.038	0
3101	4	2	5	GAL1	GAL1	180	380	1089	1102	88	-909	-8.205	0
3101	4	3	5	GAL1-S	GAL1-S	258	387	1113	1127	111	-855	-6.667	0
3101	4	4	5	GAL1-S	GAL1-S	283	407	1079	1086	89	-796	-7.629	0
3101	4	5	5	GAL2	GAL2	645	636	1003	992	116	-358	-3.069	0
3101	4	6	5	GAL2	GAL2	612	631	962	957	55	-350	-5.927	0
3101	4	7	5	GAL3	GAL3	225	372	942	928	112	-717	-4.964	0
3101	4	8	5	GAL3	GAL3	209	408	1090	1080	129	-881	-5.209	0
3101	4	9	5	GAL3C-S	GAL3C-S	1252	1265	1172	1129	150	80	0.907	0
3101	4	10	5	GAL3C-S	GAL3C-S	1345	1351	1277	1278	53	68	1.377	0
3101	4	11	5	GAL7-S	GAL7-S	1272	1207	1304	1297	141	-32	-0.638	0
3101	4	12	5	GAL7-S	GAL7-S	1294	1235	1358	1354	65	-64	-1.831	0
3101	4	1	6	GAL9	GAL9	179	327	1055	1060	78	-876	-9.397	0
3101	4	2	6	GAL9	GAL9	207	322	1111	1132	112	-904	-7.232	0
3101	4	3	6	GNA	GNA	20520	19695	1091	1105	208	19429	89.375	0
3101	4	4	6	GNA	GNA	20678	19077	1093	1107	133	19585	135.113	0
3101	4	5	6	GRFT	GRFT	1842	4630	1057	1058	137	785	26.073	0
3101	4	6	6	GRFT	GRFT	3984	5235	1020	1039	140	2964	29.971	0
3101	4	7	6	GS-I;?GSL-I	GS-I;?GSL-I	1044	986	946	950	132	98	0.273	0
3101	4	8	6	GS-I;?GSL-I	GS-I;?GSL-I	980	981	1045	1048	68	-65	-0.985	0
3101	4	9	6	GS-II; GSL-II	GS-II; GSL-II	479	598	1105	1071	132	-626	-3.583	0
3101	4	10	6	GS-II; GSL-II	GS-II; GSL-II	506	611	1218	1218	65	-712	-9.338	0
3101	4	11	6	HHA; HHL	HHA; HHL	11824	10522	1249	1236	89	10575	104.337	0
3101	4	12	6	HHA; HHL	HHA; HHL	14274	12345	1332	1335	51	12942	215.882	0
3101	4	1	7	Jacalin	Jacalin	687	738	1019	1019	65	-332	-4.323	0
3101	4	2	7	Jacalin	Jacalin	751	795	1047	1053	75	-296	-3.44	0
3101	4	3	7	LBA	LBA	805	815	1016	1012	71	-211	-2.775	0
3101	4	4	7	LBA	LBA	695	708	1010	1004	73	-315	-4.055	0
3101	4	5	7	LcH A	LcH A	767	826	972	955	128	-205	-1.008	0
3101	4	6	7	LcH A	LcH A	765	824	910	913	85	-145	-1.047	0
3101	4	7	7	LEA	LEA	863	850	937	936	95	-74	-0.905	0
3101	4	8	7	LEA	LEA	945	952	1019	1028	64	-74	-1.187	0
3101	4	9	7	LENTIL	LENTIL	1069	1126	1044	1012	119	25	0.958	0
3101	4	10	7	LENTIL	LENTIL	1083	1093	1120	1120	57	-37	-0.474	0
3101	4	11	7	Lotus	Lotus	904	879	1178	1171	270	-274	-1.081	0
3101	4	12	7	Lotus	Lotus	1024	979	1286	1282	65	-262	-4.662	0
3101	4	1	8	LSL-N	LSL-N	1278	1321	1062	1059	60	216	4.367	0
3101	4	2	8	LSL-N	LSL-N	1500	1400	1075	1077	53	425	6.094	0
3101	4	3	8	MAA; MAL	MAA; MAL	4203	3924	1062	1063	219	3141	13.064	0
3101	4	4	8	MAA; MAL	MAA; MAL	4129	3810	1056	1048	64	3073	43.156	0
3101	4	5	8	MALECTIN	MALECTIN	959	941	997	973	104	-38	-0.308	0
3101	4	6	8	MALECTIN	MALECTIN	744	744	830	826	83	-86	-0.988	0
3101	4	7	8	MOA	MOA	466	527	892	891	179	-426	-2.034	0
3101	4	8	8	MOA	MOA	458	565	977	979	43	-519	-9.628	0
3101	4	9	8	MPL; MPA	MPL; MPA	1208	1294	983	1004	264	225	1.098	0
3101	4	10	8	MPL; MPA	MPL; MPA	1263	1237	1022	1026	52	241	4.058	0
3101	4	11	8	NPA	NPA	9245	8348	1077	1075	85	8168	85.565	0
3101	4	12	8	NPA	NPA	8989	7985	1157	1154	85	7832	80.365	0
3101	4	1	9	ORYSATA	ORYSATA	841	795	1081	1077	61	-240	-4.623	0
3101	4	2	9	ORYSATA	ORYSATA	818	761	1101	1101	45	-283	-7.556	0
3101	4	3	9	PA-IIL	PA-IIL	461	572	1088	1086	77	-627	-6.675	0
3101	4	4	9	PA-IIL	PA-IIL	491	582	1084	1073	64	-593	-7.672	0
3101	4	5	9	PA-IL	PA-IL	679	626	1018	994	113	-339	-3.257	0
3101	4	6	9	PA-IL	PA-IL	733	655	946	945	63	-213	-4.603	0
3101	4	7	9	PALa	PALa	973	1839	987	986	317	-14	2.691	0
3101	4	8	9	PALa	PALa	1066	1771	1019	1022	85	47	8.812	0
3101	4	9	9	PHA-E	PHA-E	1699	1633	990	958	116	709	5.819	0
3101	4	10	9	PHA-E	PHA-E	2205	2136	1003	1022	650	1202	1.714	0
3101	4	11	9	PHA-L	PHA-L	761	787	1000	991	66	-239	-3.091	0
3101	4	12	9	PHA-L	PHA-L	855	894	1068	1065	61	-213	-2.803	0
3101	4	1	10	PHA-P	PHA-P	999	994	1088	1087	84	-89	-1.107	0
3101	4	2	10	PHA-P	PHA-P	1072	1044	1112	1090	100	-40	-0.46	0
3101	4	3	10	PNA	PNA	717	741	1108	1106	78	-391	-4.679	0
3101	4	4	10	PNA	PNA	766	774	1102	1096	98	-336	-3.286	0
3101	4	5	10	PPL	PPL	787	811	1025	1004	105	-238	-1.838	0
3101	4	6	10	PPL	PPL	731	764	1005	999	60	-274	-3.917	0
3101	4	7	10	PSA/PEA	PSA/PEA	977	1043	1062	1031	106	-85	0.113	0
3101	4	8	10	PSA/PEA	PSA/PEA	977	1022	1101	1100	94	-124	-0.83	0
3101	4	9	10	PSL1A	PSL1A	1462	4688	1054	996	192	408	19.229	0
3101	4	10	10	PSL1A	PSL1A	2141	6095	1097	1125	571	1044	8.704	0
3101	4	11	10	PTL	PTL	1147	1149	1081	1070	122	66	0.648	0
3101	4	12	10	PTL	PTL	1191	1193	1125	1126	56	66	1.196	0
3101	4	1	11	RS-FUC	RS-FUC	923	749	1080	1079	53	-157	-6.226	0
3101	4	2	11	RS-FUC	RS-FUC	745	727	1124	1115	92	-379	-4.217	0
3101	4	3	11	SAMB	SAMB	12021	11621	1095	1092	103	10926	102.223	0
3101	4	4	11	SAMB	SAMB	11859	11448	1098	1088	78	10761	132.821	0
3101	4	5	11	SBA	SBA	413	549	1032	1012	134	-619	-3.455	0
3101	4	6	11	SBA	SBA	470	586	1024	1016	70	-554	-6.143	0
3101	4	7	11	SJA	SJA	777	774	1085	1067	93	-308	-3.151	0
3101	4	8	11	SJA	SJA	905	855	1125	1120	68	-220	-3.897	0
3101	4	9	11	SNA-I	SNA-I	2357	2314	1132	1096	130	1225	9.369	0
3101	4	10	11	SNA-I	SNA-I	3404	3261	1143	1139	55	2261	38.582	0
3101	4	11	11	SNA-II	SNA-II	903	918	1135	1121	86	-232	-2.36	0
3101	4	12	11	SNA-II	SNA-II	1010	1020	1173	1172	56	-163	-2.714	0
3101	4	1	12	STL	STL	2346	2269	1093	1139	1138	1253	0.993	0
3101	4	2	12	STL	STL	2205	2058	1143	1145	70	1062	13.043	0
3101	4	3	12	UDA	UDA	788	777	1123	1107	79	-335	-4.177	0
3101	4	4	12	UDA	UDA	827	835	1121	1110	81	-294	-3.395	0
3101	4	5	12	UEA I	UEA I	1032	1039	1061	1040	111	-29	-0.009	0
3101	4	6	12	UEA I	UEA I	1090	1083	1040	1030	67	50	0.791	0
3101	4	7	12	UEA-II	UEA-II	989	1016	1103	1089	78	-114	-0.936	0
3101	4	8	12	UEA-II	UEA-II	1047	1071	1147	1145	49	-100	-1.51	0
3101	4	9	12	VFA	VFA	1000	991	1131	1094	134	-131	-0.769	0
3101	4	10	12	VFA	VFA	1068	1079	1171	1185	113	-103	-0.938	0
3101	4	11	12	VVA	VVA	10599	10021	1172	1162	71	9427	124.775	0
3101	4	12	12	VVA	VVA	7915	7576	1197	1196	86	6718	74.186	0
3101	4	1	13	WFA	WFA	537	658	1126	1122	53	-589	-8.755	0
3101	4	2	13	WFA	WFA	533	659	1144	1145	108	-611	-4.5	0
3101	4	3	13	WGA	WGA	1098	1080	1126	1117	61	-28	-0.607	0
3101	4	4	13	WGA	WGA	1131	1106	1109	1095	71	22	0.155	0
3101	4	5	13	NEG	NEG	239	381	1082	1063	107	-843	-6.374	0
3101	4	6	13	NEG	NEG	226	388	1016	1003	80	-790	-7.687	0
3101	4	7	13	NEG	NEG	877	837	1093	1076	102	-216	-2.343	0
3101	4	8	13	NEG	NEG	412	515	1145	1134	121	-733	-5.116	0
3101	4	9	13	POS2	POS2	6655	6160	1136	1099	154	5519	32.864	0
3101	4	10	13	POS2	POS2	7421	6579	1171	1170	42	6250	128.786	0
3101	4	11	13	POS1	POS1	21484	19952	1166	1151	78	20318	241.038	0
3101	4	12	13	POS1	POS1	21837	19614	1228	1228	45	20609	408.578	0
2602	5	1	1	POS1	POS1	18567	14438	720	719	52	17847	263.827	0
2602	5	2	1	POS1	POS1	21200	16558	757	740	94	20443	168.277	0
2602	5	3	1	POS2	POS2	2558	2944	786	783	53	1772	40.774	0
2602	5	4	1	POS2	POS2	2610	3542	780	778	43	1830	64.279	0
2602	5	5	1	NEG	NEG	120	368	727	713	68	-607	-5.074	0
2602	5	6	1	NEG	NEG	112	358	686	691	156	-574	-2.135	0
2602	5	7	1	NEG	NEG	98	349	699	702	65	-601	-5.431	0
2602	5	8	1	NEG	NEG	175	429	752	746	65	-577	-4.877	0
2602	5	9	1	AAA	AAA	445	504	786	785	45	-341	-6.244	0
2602	5	10	1	AAA	AAA	477	523	795	784	59	-318	-4.424	0
2602	5	11	1	AAL	AAL	667	680	800	795	167	-133	-0.689	0
2602	5	12	1	AAL	AAL	721	727	794	792	49	-73	-1.327	0
2602	5	1	2	ACG	ACG	834	826	791	789	44	43	0.841	0
2602	5	2	2	ACG	ACG	711	700	784	763	92	-73	-0.685	0
2602	5	3	2	ACL	ACL	295	361	775	771	56	-480	-7.321	0
2602	5	4	2	ACL	ACL	326	370	782	785	55	-456	-7.545	0
2602	5	5	2	ASA	ASA	7468	6711	749	740	93	6719	64.204	0
2602	5	6	2	ASA	ASA	9475	7636	707	710	61	8768	113.541	0
2602	5	7	2	BANLEC	BANLEC	3148	3201	701	703	48	2447	52.042	0
2602	5	8	2	BANLEC	BANLEC	4417	4480	757	759	49	3660	75.939	0
2602	5	9	2	BC2L-A	BC2L-A	1345	1333	790	790	50	555	10.86	0
2602	5	10	2	BC2L-A	BC2L-A	1434	1252	808	799	60	626	7.55	0
2602	5	11	2	BC2LCN	BC2LCN	633	638	807	794	71	-174	-2.197	0
2602	5	12	2	BC2LCN	BC2LCN	641	655	799	798	133	-158	-1.075	0
2602	5	1	3	BPA; BPL	BPA; BPL	589	596	807	818	105	-218	-2.114	0
2602	5	2	3	BPA; BPL	BPA; BPL	475	496	783	760	93	-308	-2.839	0
2602	5	3	3	CALSEPA	CALSEPA	1449	3823	762	765	111	687	27.55	0
2602	5	4	3	CALSEPA	CALSEPA	2267	4459	772	775	89	1495	41.393	0
2602	5	5	3	CGL2	CGL2	967	1502	760	758	69	207	10.783	0
2602	5	6	3	CGL2	CGL2	930	1330	724	727	83	206	7.265	0
2602	5	7	3	CNL	CNL	644	543	692	713	530	-48	-0.321	0
2602	5	8	3	CNL	CNL	626	557	752	753	48	-126	-4.083	0
2602	5	9	3	Con A	Con A	924	927	783	782	42	141	3.452	0
2602	5	10	3	Con A	Con A	899	932	790	796	540	109	0.252	0
2602	5	11	3	DBA	DBA	938	964	808	796	64	130	2.625	0
2602	5	12	3	DBA	DBA	1000	1040	816	814	62	184	3.645	0
2602	5	1	4	DISCOIDIN I	DISCOIDIN I	392	437	781	783	80	-389	-4.325	0
2602	5	2	4	DISCOIDIN I	DISCOIDIN I	750	571	788	757	161	-38	-1.155	0
2602	5	3	4	DISCOIDIN II	DISCOIDIN II	380	455	748	756	62	-368	-4.855	0
2602	5	4	4	DISCOIDIN II	DISCOIDIN II	323	407	773	771	67	-450	-5.433	0
2602	5	5	4	DSA	DSA	2147	1962	741	735	61	1406	20.115	0
2602	5	6	4	DSA	DSA	1989	1972	705	707	45	1284	28.111	0
2602	5	7	4	ECA	ECA	399	437	681	681	40	-282	-6.1	0
2602	5	8	4	ECA	ECA	596	5730	741	742	42	-145	118.762	0
2602	5	9	4	EEL	EEL	340	426	773	770	55	-433	-6.255	0
2602	5	10	4	EEL	EEL	388	450	790	781	65	-402	-5.092	0
2602	5	11	4	F17AG	F17AG	547	562	792	784	62	-245	-3.581	0
2602	5	12	4	F17AG	F17AG	623	625	802	795	53	-179	-3.208	0
2602	5	1	5	GAL1	GAL1	150	406	780	788	89	-630	-4.292	0
2602	5	2	5	GAL1	GAL1	177	385	792	786	124	-615	-3.234	0
2602	5	3	5	GAL1-S	GAL1-S	401	442	759	752	117	-358	-2.65	0
2602	5	4	5	GAL1-S	GAL1-S	600	499	777	765	129	-177	-2.062	0
2602	5	5	5	GAL2	GAL2	501	493	761	762	63	-260	-4.27	0
2602	5	6	5	GAL2	GAL2	482	483	691	696	64	-209	-3.328	0
2602	5	7	5	GAL3	GAL3	83	248	675	674	78	-592	-5.462	0
2602	5	8	5	GAL3	GAL3	122	331	728	720	90	-606	-4.322	0
2602	5	9	5	GAL3C-S	GAL3C-S	749	747	753	752	41	-4	-0.122	0
2602	5	10	5	GAL3C-S	GAL3C-S	761	754	762	752	58	-1	0.034	0
2602	5	11	5	GAL7-S	GAL7-S	742	722	775	762	71	-33	-0.563	0
2602	5	12	5	GAL7-S	GAL7-S	761	751	787	781	47	-26	-0.638	0
2602	5	1	6	GAL9	GAL9	136	271	753	761	85	-617	-5.765	0
2602	5	2	6	GAL9	GAL9	197	293	752	742	113	-555	-3.973	0
2602	5	3	6	GNA	GNA	19968	20937	741	742	83	19227	243.313	0
2602	5	4	6	GNA	GNA	18843	18830	761	770	71	18082	254.366	0
2602	5	5	6	GRFT	GRFT	3844	5778	723	726	89	3121	56.764	0
2602	5	6	6	GRFT	GRFT	3915	5765	699	703	63	3216	80.349	0
2602	5	7	6	GS-I;?GSL-I	GS-I;?GSL-I	658	638	666	670	58	-8	-0.552	0
2602	5	8	6	GS-I;?GSL-I	GS-I;?GSL-I	626	616	720	725	69	-94	-1.58	0
2602	5	9	6	GS-II; GSL-II	GS-II; GSL-II	403	491	743	744	53	-340	-4.774	0
2602	5	10	6	GS-II; GSL-II	GS-II; GSL-II	397	465	747	740	63	-350	-4.365	0
2602	5	11	6	HHA; HHL	HHA; HHL	14345	12143	759	751	72	13586	158.222	0
2602	5	12	6	HHA; HHL	HHA; HHL	12480	10794	775	773	77	11705	130.143	0
2602	5	1	7	Jacalin	Jacalin	506	548	704	715	66	-198	-2.53	0
2602	5	2	7	Jacalin	Jacalin	480	509	698	690	98	-218	-1.847	0
2602	5	3	7	LBA	LBA	473	474	648	650	66	-175	-2.667	0
2602	5	4	7	LBA	LBA	291	301	656	638	113	-365	-2.982	0
2602	5	5	7	LcH A	LcH A	498	538	636	642	140	-138	-0.743	0
2602	5	6	7	LcH A	LcH A	537	553	600	596	73	-63	-0.589	0
2602	5	7	7	LEA	LEA	489	506	646	651	58	-157	-2.5	0
2602	5	8	7	LEA	LEA	528	547	703	708	58	-175	-2.776	0
2602	5	9	7	LENTIL	LENTIL	664	696	729	734	62	-65	-0.613	0
2602	5	10	7	LENTIL	LENTIL	646	652	740	742	87	-94	-1.034	0
2602	5	11	7	Lotus	Lotus	495	500	747	738	75	-252	-3.173	0
2602	5	12	7	Lotus	Lotus	478	490	740	719	87	-262	-2.632	0
2602	5	1	8	LSL-N	LSL-N	1035	978	738	748	81	297	2.84	0
2602	5	2	8	LSL-N	LSL-N	842	833	725	711	109	117	1.119	0
2602	5	3	8	MAA; MAL	MAA; MAL	2630	2400	699	697	67	1931	25.418	0
2602	5	4	8	MAA; MAL	MAA; MAL	2718	2437	652	646	69	2066	25.957	0
2602	5	5	8	MALECTIN	MALECTIN	457	458	606	594	91	-149	-1.495	0
2602	5	6	8	MALECTIN	MALECTIN	373	364	487	486	87	-114	-1.402	0
2602	5	7	8	MOA	MOA	311	387	630	653	631	-319	-0.422	0
2602	5	8	8	MOA	MOA	305	373	665	663	42	-360	-6.905	0
2602	5	9	8	MPL; MPA	MPL; MPA	757	732	694	692	42	63	0.952	0
2602	5	10	8	MPL; MPA	MPL; MPA	745	736	706	700	55	39	0.655	0
2602	5	11	8	NPA	NPA	7451	6884	717	708	58	6734	106.483	0
2602	5	12	8	NPA	NPA	8014	7443	722	720	56	7292	120.054	0
2602	5	1	9	ORYSATA	ORYSATA	524	543	781	789	71	-257	-3.465	0
2602	5	2	9	ORYSATA	ORYSATA	443	448	724	707	103	-281	-2.515	0
2602	5	3	9	PA-IIL	PA-IIL	446	553	707	704	56	-261	-2.696	0
2602	5	4	9	PA-IIL	PA-IIL	476	594	697	698	54	-221	-1.926	0
2602	5	5	9	PA-IL	PA-IL	349	348	632	641	78	-283	-3.756	0
2602	5	6	9	PA-IL	PA-IL	343	376	641	635	66	-298	-3.924	0
2602	5	7	9	PALa	PALa	448	1411	654	653	45	-206	16.844	0
2602	5	8	9	PALa	PALa	629	1285	661	661	51	-32	12.235	0
2602	5	9	9	PHA-E	PHA-E	1526	1440	683	688	66	843	11.394	0
2602	5	10	9	PHA-E	PHA-E	1871	1850	688	685	57	1183	20.439	0
2602	5	11	9	PHA-L	PHA-L	658	673	698	690	65	-40	-0.262	0
2602	5	12	9	PHA-L	PHA-L	790	802	698	697	56	92	1.875	0
2602	5	1	10	PHA-P	PHA-P	591	556	791	793	79	-200	-3	0
2602	5	2	10	PHA-P	PHA-P	622	611	720	697	126	-98	-0.683	0
2602	5	3	10	PNA	PNA	389	427	735	731	50	-346	-6.08	0
2602	5	4	10	PNA	PNA	401	438	719	723	55	-318	-5.182	0
2602	5	5	10	PPL	PPL	541	559	673	671	61	-132	-1.836	0
2602	5	6	10	PPL	PPL	504	542	687	685	52	-183	-2.75	0
2602	5	7	10	PSA/PEA	PSA/PEA	589	642	716	720	83	-127	-0.94	0
2602	5	8	10	PSA/PEA	PSA/PEA	644	664	733	730	44	-89	-1.5	0
2602	5	9	10	PSL1A	PSL1A	835	1612	764	762	50	71	17	0
2602	5	10	10	PSL1A	PSL1A	1078	2350	757	750	89	321	17.978	0
2602	5	11	10	PTL	PTL	798	782	759	748	69	39	0.493	0
2602	5	12	10	PTL	PTL	828	816	775	785	315	53	0.098	0
2602	5	1	11	RS-FUC	RS-FUC	698	594	793	794	66	-95	-3.03	0
2602	5	2	11	RS-FUC	RS-FUC	557	513	736	719	143	-179	-1.441	0
2602	5	3	11	SAMB	SAMB	9251	9081	751	753	48	8500	173.5	0
2602	5	4	11	SAMB	SAMB	9124	8559	734	736	59	8390	132.593	0
2602	5	5	11	SBA	SBA	330	393	673	672	50	-343	-5.58	0
2602	5	6	11	SBA	SBA	357	429	700	697	91	-343	-2.945	0
2602	5	7	11	SJA	SJA	477	498	749	750	189	-272	-1.333	0
2602	5	8	11	SJA	SJA	554	560	777	772	56	-223	-3.786	0
2602	5	9	11	SNA-I	SNA-I	1588	1605	805	802	47	783	17.085	0
2602	5	10	11	SNA-I	SNA-I	2647	2481	804	796	61	1843	27.623	0
2602	5	11	11	SNA-II	SNA-II	586	589	789	776	85	-203	-2.2	0
2602	5	12	11	SNA-II	SNA-II	553	562	799	792	56	-246	-4.107	0
2602	5	1	12	STL	STL	2044	1912	785	786	74	1259	15.216	0
2602	5	2	12	STL	STL	1884	1774	743	724	104	1141	10.096	0
2602	5	3	12	UDA	UDA	542	535	750	760	462	-208	-0.487	0
2602	5	4	12	UDA	UDA	539	528	733	745	462	-194	-0.47	0
2602	5	5	12	UEA I	UEA I	834	830	677	674	68	157	2.294	0
2602	5	6	12	UEA I	UEA I	807	849	715	707	55	92	2.582	0
2602	5	7	12	UEA-II	UEA-II	666	709	776	786	330	-110	-0.233	0
2602	5	8	12	UEA-II	UEA-II	630	648	823	822	47	-193	-3.702	0
2602	5	9	12	VFA	VFA	637	656	858	856	58	-221	-3.448	0
2602	5	10	12	VFA	VFA	728	727	867	859	84	-139	-1.571	0
2602	5	11	12	VVA	VVA	7319	7296	848	846	86	6471	75	0
2602	5	12	12	VVA	VVA	8810	8771	810	806	49	8000	162.551	0
2602	5	1	13	WFA	WFA	468	545	800	807	247	-332	-1.061	0
2602	5	2	13	WFA	WFA	367	432	742	719	118	-375	-2.432	0
2602	5	3	13	WGA	WGA	687	677	781	780	40	-94	-2.575	0
2602	5	4	13	WGA	WGA	700	698	758	754	45	-58	-1.244	0
2602	5	5	13	NEG	NEG	69	232	700	702	124	-631	-3.79	0
2602	5	6	13	NEG	NEG	88	225	726	717	59	-638	-8.339	0
2602	5	7	13	NEG	NEG	194	336	791	788	81	-597	-5.58	0
2602	5	8	13	NEG	NEG	270	395	832	823	85	-562	-5.035	0
2602	5	9	13	POS2	POS2	7273	7256	794	728	201	6479	32.478	0
2602	5	10	13	POS2	POS2	7700	8171	808	773	151	6892	48.993	0
2602	5	11	13	POS1	POS1	23050	19547	855	858	105	22195	177.99	0
2602	5	12	13	POS1	POS1	25904	23271	824	825	72	25080	311.75	0
3102	6	1	1	POS1	POS1	17911	14850	987	982	62	16924	223.677	0
3102	6	2	1	POS1	POS1	20224	16092	940	941	53	19284	285.868	0
3102	6	3	1	POS2	POS2	2358	2762	894	888	60	1464	31.233	0
3102	6	4	1	POS2	POS2	2362	3221	895	883	67	1467	34.896	0
3102	6	5	1	NEG	NEG	72	334	960	938	102	-888	-5.922	0
3102	6	6	1	NEG	NEG	97	297	1021	1013	55	-924	-13.018	0
3102	6	7	1	NEG	NEG	95	371	1071	1070	80	-976	-8.737	0
3102	6	8	1	NEG	NEG	120	449	1198	1198	73	-1078	-10.26	0
3102	6	9	1	AAA	AAA	886	950	1211	1172	147	-325	-1.51	0
3102	6	10	1	AAA	AAA	941	997	1275	1262	95	-334	-2.789	0
3102	6	11	1	AAL	AAL	1165	1162	1222	1190	129	-57	-0.217	0
3102	6	12	1	AAL	AAL	1250	1254	1311	1269	114	-61	-0.132	0
3102	6	1	2	ACG	ACG	1270	1276	1019	1014	57	251	4.596	0
3102	6	2	2	ACG	ACG	1240	1210	1017	1017	46	223	4.196	0
3102	6	3	2	ACL	ACL	543	546	983	975	73	-440	-5.877	0
3102	6	4	2	ACL	ACL	606	608	946	943	65	-340	-5.154	0
3102	6	5	2	ASA	ASA	7892	7465	954	932	101	6938	64.683	0
3102	6	6	2	ASA	ASA	9552	8363	1009	1003	54	8543	136.296	0
3102	6	7	2	BANLEC	BANLEC	4135	3837	1066	1063	93	3069	29.828	0
3102	6	8	2	BANLEC	BANLEC	5945	5892	1195	1193	111	4750	42.333	0
3102	6	9	2	BC2L-A	BC2L-A	1682	1692	1205	1156	153	477	3.503	0
3102	6	10	2	BC2L-A	BC2L-A	1880	1745	1283	1282	47	597	9.851	0
3102	6	11	2	BC2LCN	BC2LCN	1063	1068	1298	1278	86	-235	-2.442	0
3102	6	12	2	BC2LCN	BC2LCN	1096	1111	1351	1351	57	-255	-4.211	0
3102	6	1	3	BPA; BPL	BPA; BPL	693	691	1024	1020	54	-331	-6.093	0
3102	6	2	3	BPA; BPL	BPA; BPL	770	802	1040	1041	49	-270	-4.878	0
3102	6	3	3	CALSEPA	CALSEPA	3574	3892	1025	1019	62	2549	46.339	0
3102	6	4	3	CALSEPA	CALSEPA	5289	10508	1000	1001	168	4289	56.589	0
3102	6	5	3	CGL2	CGL2	1029	1121	968	948	101	61	1.713	0
3102	6	6	3	CGL2	CGL2	1161	1445	995	989	55	166	8.291	0
3102	6	7	3	CNL	CNL	913	758	1034	1028	81	-121	-3.333	0
3102	6	8	3	CNL	CNL	677	638	1150	1147	67	-473	-7.597	0
3102	6	9	3	Con A	Con A	923	956	1158	1121	163	-235	-1.012	0
3102	6	10	3	Con A	Con A	964	983	1280	1279	66	-316	-4.485	0
3102	6	11	3	DBA	DBA	1104	1151	1316	1297	83	-212	-1.759	0
3102	6	12	3	DBA	DBA	1201	1237	1377	1374	59	-176	-2.322	0
3102	6	1	4	DISCOIDIN I	DISCOIDIN I	215	365	1032	1042	195	-817	-3.472	0
3102	6	2	4	DISCOIDIN I	DISCOIDIN I	305	340	1041	1042	40	-736	-17.55	0
3102	6	3	4	DISCOIDIN II	DISCOIDIN II	681	714	1036	1032	57	-355	-5.579	0
3102	6	4	4	DISCOIDIN II	DISCOIDIN II	678	708	1044	1034	105	-366	-3.105	0
3102	6	5	4	DSA	DSA	4021	3725	1003	980	105	3018	26.143	0
3102	6	6	4	DSA	DSA	3744	3489	992	990	85	2752	29.4	0
3102	6	7	4	ECA	ECA	889	5536	982	965	117	-93	39.068	0
3102	6	8	4	ECA	ECA	626	3817	1100	1031	365	-474	7.633	0
3102	6	9	4	EEL	EEL	1352	1333	1215	1175	143	137	1.105	0
3102	6	10	4	EEL	EEL	1241	1252	1295	1304	94	-54	-0.553	0
3102	6	11	4	F17AG	F17AG	941	961	1308	1289	88	-367	-3.727	0
3102	6	12	4	F17AG	F17AG	972	990	1368	1366	53	-396	-7.094	0
3102	6	1	5	GAL1	GAL1	156	389	1053	1057	95	-897	-7.032	0
3102	6	2	5	GAL1	GAL1	228	503	1059	1059	40	-831	-13.9	0
3102	6	3	5	GAL1-S	GAL1-S	429	560	1053	1026	142	-624	-3.282	0
3102	6	4	5	GAL1-S	GAL1-S	406	577	1054	1022	151	-648	-2.947	0
3102	6	5	5	GAL2	GAL2	575	541	1023	1003	97	-448	-4.763	0
3102	6	6	5	GAL2	GAL2	560	581	980	960	77	-420	-4.922	0
3102	6	7	5	GAL3	GAL3	52	128	960	950	69	-908	-11.913	0
3102	6	8	5	GAL3	GAL3	81	161	1125	1126	64	-1044	-15.078	0
3102	6	9	5	GAL3C-S	GAL3C-S	1197	1202	1190	1150	299	7	0.174	0
3102	6	10	5	GAL3C-S	GAL3C-S	1306	1314	1282	1284	53	24	0.566	0
3102	6	11	5	GAL7-S	GAL7-S	1218	1142	1311	1290	83	-93	-1.783	0
3102	6	12	5	GAL7-S	GAL7-S	1247	1165	1367	1365	58	-120	-3.448	0
3102	6	1	6	GAL9	GAL9	215	369	1074	1087	101	-859	-7.109	0
3102	6	2	6	GAL9	GAL9	208	377	1086	1095	100	-878	-7.18	0
3102	6	3	6	GNA	GNA	22163	21905	1100	1100	124	21063	167.782	0
3102	6	4	6	GNA	GNA	21753	20987	1104	1114	110	20649	180.664	0
3102	6	5	6	GRFT	GRFT	4150	5646	1069	1062	136	3081	33.706	0
3102	6	6	6	GRFT	GRFT	4033	5595	856	861	148	3177	31.986	0
3102	6	7	6	GS-I;?GSL-I	GS-I;?GSL-I	804	787	760	755	112	44	0.286	0
3102	6	8	6	GS-I;?GSL-I	GS-I;?GSL-I	848	822	1024	1000	200	-176	-0.89	0
3102	6	9	6	GS-II; GSL-II	GS-II; GSL-II	489	569	1135	1101	131	-646	-4.061	0
3102	6	10	6	GS-II; GSL-II	GS-II; GSL-II	477	590	1245	1246	50	-768	-13.12	0
3102	6	11	6	HHA; HHL	HHA; HHL	14379	12360	1274	1259	85	13105	130.6	0
3102	6	12	6	HHA; HHL	HHA; HHL	14790	12824	1358	1359	45	13432	254.778	0
3102	6	1	7	Jacalin	Jacalin	717	756	1014	1020	85	-297	-3.106	0
3102	6	2	7	Jacalin	Jacalin	759	802	1092	1111	108	-333	-2.861	0
3102	6	3	7	LBA	LBA	764	786	1089	1102	105	-325	-3.01	0
3102	6	4	7	LBA	LBA	675	671	1055	1060	84	-380	-4.631	0
3102	6	5	7	LcH A	LcH A	925	981	970	957	123	-45	0.195	0
3102	6	6	7	LcH A	LcH A	740	819	760	758	94	-20	0.649	0
3102	6	7	7	LEA	LEA	510	510	681	715	143	-171	-1.434	0
3102	6	8	7	LEA	LEA	915	924	1037	1008	109	-122	-0.771	0
3102	6	9	7	LENTIL	LENTIL	1191	1283	1097	1063	128	94	1.719	0
3102	6	10	7	LENTIL	LENTIL	1316	1349	1198	1197	52	118	2.923	0
3102	6	11	7	Lotus	Lotus	853	818	1234	1221	83	-381	-4.855	0
3102	6	12	7	Lotus	Lotus	941	924	1346	1344	53	-405	-7.925	0
3102	6	1	8	LSL-N	LSL-N	1288	1333	1052	1052	74	236	3.797	0
3102	6	2	8	LSL-N	LSL-N	1251	1307	1110	1123	84	141	2.19	0
3102	6	3	8	MAA; MAL	MAA; MAL	4493	4075	1096	1105	92	3397	32.283	0
3102	6	4	8	MAA; MAL	MAA; MAL	4415	4034	1065	1060	79	3350	37.646	0
3102	6	5	8	MALECTIN	MALECTIN	1074	1034	1004	994	136	70	0.294	0
3102	6	6	8	MALECTIN	MALECTIN	695	681	769	781	102	-74	-0.98	0
3102	6	7	8	MOA	MOA	421	501	787	804	102	-366	-2.971	0
3102	6	8	8	MOA	MOA	469	571	1025	1028	49	-556	-9.327	0
3102	6	9	8	MPL; MPA	MPL; MPA	1294	1251	1060	1023	123	234	1.854	0
3102	6	10	8	MPL; MPA	MPL; MPA	1340	1360	1148	1150	47	192	4.468	0
3102	6	11	8	NPA	NPA	9260	8309	1207	1195	94	8053	75.681	0
3102	6	12	8	NPA	NPA	9652	8396	1278	1275	105	8374	67.819	0
3102	6	1	9	ORYSATA	ORYSATA	1068	989	1068	1062	56	0	-1.304	0
3102	6	2	9	ORYSATA	ORYSATA	1006	943	1093	1096	57	-87	-2.684	0
3102	6	3	9	PA-IIL	PA-IIL	462	681	1084	1079	79	-622	-5.038	0
3102	6	4	9	PA-IIL	PA-IIL	634	670	1079	1067	81	-445	-4.901	0
3102	6	5	9	PA-IL	PA-IL	734	650	1037	1016	111	-303	-3.297	0
3102	6	6	9	PA-IL	PA-IL	701	659	973	967	95	-272	-3.242	0
3102	6	7	9	PALa	PALa	1053	2291	1022	1011	91	31	14.066	0
3102	6	8	9	PALa	PALa	750	2335	1044	1047	62	-294	20.774	0
3102	6	9	9	PHA-E	PHA-E	2936	2854	1054	1017	122	1882	15.057	0
3102	6	10	9	PHA-E	PHA-E	3001	2857	1112	1110	42	1889	41.595	0
3102	6	11	9	PHA-L	PHA-L	982	1025	1159	1143	80	-177	-1.475	0
3102	6	12	9	PHA-L	PHA-L	1172	1212	1227	1241	493	-55	-0.059	0
3102	6	1	10	PHA-P	PHA-P	968	974	1088	1081	72	-120	-1.486	0
3102	6	2	10	PHA-P	PHA-P	1037	1014	1103	1094	74	-66	-1.081	0
3102	6	3	10	PNA	PNA	705	718	1122	1118	76	-417	-5.263	0
3102	6	4	10	PNA	PNA	740	759	1108	1101	80	-368	-4.275	0
3102	6	5	10	PPL	PPL	812	834	1068	1042	118	-256	-1.763	0
3102	6	6	10	PPL	PPL	778	803	1064	1058	66	-286	-3.864	0
3102	6	7	10	PSA/PEA	PSA/PEA	1152	1251	1096	1083	74	56	2.27	0
3102	6	8	10	PSA/PEA	PSA/PEA	1250	1302	1138	1139	55	112	2.964	0
3102	6	9	10	PSL1A	PSL1A	1118	2786	1128	1093	123	-10	13.764	0
3102	6	10	10	PSL1A	PSL1A	2177	5300	1172	1171	46	1005	89.761	0
3102	6	11	10	PTL	PTL	1276	1252	1170	1155	77	106	1.26	0
3102	6	12	10	PTL	PTL	1309	1291	1245	1233	85	64	0.682	0
3102	6	1	11	RS-FUC	RS-FUC	1055	879	1084	1073	75	-29	-2.587	0
3102	6	2	11	RS-FUC	RS-FUC	994	851	1127	1127	49	-133	-5.633	0
3102	6	3	11	SAMB	SAMB	15327	13449	1125	1128	143	14202	86.161	0
3102	6	4	11	SAMB	SAMB	15653	14103	1115	1115	146	14538	88.959	0
3102	6	5	11	SBA	SBA	780	796	1091	1068	113	-311	-2.407	0
3102	6	6	11	SBA	SBA	551	627	1094	1086	61	-543	-7.525	0
3102	6	7	11	SJA	SJA	763	781	1133	1116	87	-370	-3.851	0
3102	6	8	11	SJA	SJA	933	880	1155	1156	129	-222	-2.14	0
3102	6	9	11	SNA-I	SNA-I	3143	3038	1158	1126	137	1985	13.956	0
3102	6	10	11	SNA-I	SNA-I	4697	4459	1190	1189	47	3507	69.574	0
3102	6	11	11	SNA-II	SNA-II	960	972	1196	1181	193	-236	-1.083	0
3102	6	12	11	SNA-II	SNA-II	1030	1034	1278	1286	180	-248	-1.4	0
3102	6	1	12	STL	STL	2594	2546	1068	1057	72	1526	20.681	0
3102	6	2	12	STL	STL	2516	2351	1115	1114	50	1401	24.74	0
3102	6	3	12	UDA	UDA	898	873	1101	1084	85	-203	-2.482	0
3102	6	4	12	UDA	UDA	855	831	1113	1095	84	-258	-3.143	0
3102	6	5	12	UEA I	UEA I	985	1028	1093	1071	114	-108	-0.377	0
3102	6	6	12	UEA I	UEA I	1376	1353	1098	1092	121	278	2.157	0
3102	6	7	12	UEA-II	UEA-II	1095	1105	1134	1117	84	-39	-0.143	0
3102	6	8	12	UEA-II	UEA-II	1051	1075	1166	1165	41	-115	-2.195	0
3102	6	9	12	VFA	VFA	990	1002	1153	1117	135	-163	-0.852	0
3102	6	10	12	VFA	VFA	1069	1075	1186	1187	44	-117	-2.545	0
3102	6	11	12	VVA	VVA	7360	7002	1229	1214	81	6131	71.457	0
3102	6	12	12	VVA	VVA	7351	6966	1312	1316	60	6039	94.167	0
3102	6	1	13	WFA	WFA	490	609	1086	1079	61	-596	-7.705	0
3102	6	2	13	WFA	WFA	527	606	1124	1125	45	-597	-11.533	0
3102	6	3	13	WGA	WGA	1176	1379	1107	1096	67	69	4.224	0
3102	6	4	13	WGA	WGA	1118	1092	1126	1105	91	-8	-0.143	0
3102	6	5	13	NEG	NEG	131	363	1133	1112	107	-1002	-7	0
3102	6	6	13	NEG	NEG	117	377	1094	1073	118	-977	-5.898	0
3102	6	7	13	NEG	NEG	169	262	1152	1138	87	-983	-10.069	0
3102	6	8	13	NEG	NEG	213	307	1167	1156	99	-954	-8.576	0
3102	6	9	13	POS2	POS2	6816	6405	1173	1141	121	5643	43.504	0
3102	6	10	13	POS2	POS2	7676	7038	1212	1214	60	6464	97.067	0
3102	6	11	13	POS1	POS1	23219	22176	1210	1191	109	22009	192.523	0
3102	6	12	13	POS1	POS1	23540	20962	1303	1302	45	22237	436.889	0
2609	7	1	1	POS1	POS1	19356	15167	965	958	57	18391	249.281	0
2609	7	2	1	POS1	POS1	21734	17165	933	911	141	20801	115.277	0
2609	7	3	1	POS2	POS2	2633	3122	944	986	1534	1689	1.392	0
2609	7	4	1	POS2	POS2	2660	3741	928	924	60	1732	46.95	0
2609	7	5	1	NEG	NEG	219	658	888	868	184	-669	-1.141	0
2609	7	6	1	NEG	NEG	224	392	867	866	62	-643	-7.645	0
2609	7	7	1	NEG	NEG	142	668	917	919	57	-775	-4.404	0
2609	7	8	1	NEG	NEG	184	605	947	951	82	-763	-4.22	0
2609	7	9	1	AAA	AAA	538	583	951	953	121	-413	-3.058	0
2609	7	10	1	AAA	AAA	562	606	967	954	78	-405	-4.462	0
2609	7	11	1	AAL	AAL	629	666	956	945	87	-327	-3.207	0
2609	7	12	1	AAL	AAL	706	744	949	942	60	-243	-3.3	0
2609	7	1	2	ACG	ACG	782	781	954	949	61	-172	-2.754	0
2609	7	2	2	ACG	ACG	668	673	952	923	125	-284	-2	0
2609	7	3	2	ACL	ACL	302	365	940	933	71	-638	-8	0
2609	7	4	2	ACL	ACL	424	504	945	944	84	-521	-5.238	0
2609	7	5	2	ASA	ASA	8372	7151	864	856	84	7508	74.94	0
2609	7	6	2	ASA	ASA	9759	7870	888	882	72	8871	97.056	0
2609	7	7	2	BANLEC	BANLEC	4045	3909	922	927	81	3123	36.815	0
2609	7	8	2	BANLEC	BANLEC	3349	3153	957	957	65	2392	33.785	0
2609	7	9	2	BC2L-A	BC2L-A	1384	1345	949	948	84	435	4.726	0
2609	7	10	2	BC2L-A	BC2L-A	1246	1284	963	947	91	283	3.703	0
2609	7	11	2	BC2LCN	BC2LCN	738	755	948	936	84	-210	-2.155	0
2609	7	12	2	BC2LCN	BC2LCN	765	764	982	972	70	-217	-2.971	0
2609	7	1	3	BPA; BPL	BPA; BPL	747	744	975	979	74	-228	-3.176	0
2609	7	2	3	BPA; BPL	BPA; BPL	700	711	952	927	138	-252	-1.565	0
2609	7	3	3	CALSEPA	CALSEPA	1803	4854	948	948	135	855	28.933	0
2609	7	4	3	CALSEPA	CALSEPA	2793	5896	931	934	149	1862	33.302	0
2609	7	5	3	CGL2	CGL2	1153	1677	925	919	155	228	4.89	0
2609	7	6	3	CGL2	CGL2	1138	1891	908	900	88	230	11.261	0
2609	7	7	3	CNL	CNL	697	651	909	904	125	-212	-2.024	0
2609	7	8	3	CNL	CNL	857	748	961	942	108	-104	-1.796	0
2609	7	9	3	Con A	Con A	844	885	988	982	69	-144	-1.406	0
2609	7	10	3	Con A	Con A	852	859	891	862	134	-39	-0.022	0
2609	7	11	3	DBA	DBA	950	1018	943	940	103	7	0.757	0
2609	7	12	3	DBA	DBA	1060	1110	1002	995	68	58	1.691	0
2609	7	1	4	DISCOIDIN I	DISCOIDIN I	213	310	952	956	178	-739	-3.629	0
2609	7	2	4	DISCOIDIN I	DISCOIDIN I	206	324	881	836	199	-675	-2.573	0
2609	7	3	4	DISCOIDIN II	DISCOIDIN II	434	505	931	903	115	-497	-3.461	0
2609	7	4	4	DISCOIDIN II	DISCOIDIN II	369	436	909	880	119	-540	-3.731	0
2609	7	5	4	DSA	DSA	2660	2518	840	823	122	1820	13.893	0
2609	7	6	4	DSA	DSA	2588	2486	869	852	228	1719	7.167	0
2609	7	7	4	ECA	ECA	488	552	886	879	105	-398	-3.114	0
2609	7	8	4	ECA	ECA	532	600	931	915	123	-399	-2.561	0
2609	7	9	4	EEL	EEL	934	930	988	976	106	-54	-0.434	0
2609	7	10	4	EEL	EEL	918	923	928	918	112	-10	0.045	0
2609	7	11	4	F17AG	F17AG	646	661	986	947	125	-340	-2.288	0
2609	7	12	4	F17AG	F17AG	670	680	1002	989	81	-332	-3.815	0
2609	7	1	5	GAL1	GAL1	335	544	961	949	87	-626	-4.655	0
2609	7	2	5	GAL1	GAL1	128	386	934	888	148	-806	-3.392	0
2609	7	3	5	GAL1-S	GAL1-S	461	538	902	844	170	-441	-1.8	0
2609	7	4	5	GAL1-S	GAL1-S	518	600	910	856	168	-392	-1.524	0
2609	7	5	5	GAL2	GAL2	572	568	940	936	83	-368	-4.434	0
2609	7	6	5	GAL2	GAL2	631	638	873	860	90	-242	-2.467	0
2609	7	7	5	GAL3	GAL3	84	359	945	942	81	-861	-7.198	0
2609	7	8	5	GAL3	GAL3	133	454	980	964	103	-847	-4.951	0
2609	7	9	5	GAL3C-S	GAL3C-S	963	959	979	961	108	-16	-0.019	0
2609	7	10	5	GAL3C-S	GAL3C-S	972	988	947	932	100	25	0.56	0
2609	7	11	5	GAL7-S	GAL7-S	821	819	925	880	147	-104	-0.415	0
2609	7	12	5	GAL7-S	GAL7-S	833	820	972	957	143	-139	-0.958	0
2609	7	1	6	GAL9	GAL9	172	385	940	941	69	-768	-8.058	0
2609	7	2	6	GAL9	GAL9	404	962	826	798	165	-422	0.994	0
2609	7	3	6	GNA	GNA	16361	16673	872	851	122	15489	129.689	0
2609	7	4	6	GNA	GNA	16157	15415	913	909	281	15244	51.623	0
2609	7	5	6	GRFT	GRFT	3109	4551	873	846	116	2236	31.94	0
2609	7	6	6	GRFT	GRFT	3355	4730	862	857	171	2493	22.649	0
2609	7	7	6	GS-I;?GSL-I	GS-I;?GSL-I	610	610	843	828	95	-233	-2.295	0
2609	7	8	6	GS-I;?GSL-I	GS-I;?GSL-I	641	647	929	909	106	-288	-2.472	0
2609	7	9	6	GS-II; GSL-II	GS-II; GSL-II	547	615	926	890	143	-379	-1.923	0
2609	7	10	6	GS-II; GSL-II	GS-II; GSL-II	526	569	863	832	144	-337	-1.826	0
2609	7	11	6	HHA; HHL	HHA; HHL	12227	10279	816	813	124	11411	76.339	0
2609	7	12	6	HHA; HHL	HHA; HHL	14218	11719	966	930	123	13252	87.715	0
2609	7	1	7	Jacalin	Jacalin	571	611	915	914	53	-344	-5.717	0
2609	7	2	7	Jacalin	Jacalin	598	608	835	803	137	-237	-1.423	0
2609	7	3	7	LBA	LBA	537	534	817	798	161	-280	-1.64	0
2609	7	4	7	LBA	LBA	601	640	854	848	106	-253	-1.962	0
2609	7	5	7	LcH A	LcH A	633	661	830	823	115	-197	-1.409	0
2609	7	6	7	LcH A	LcH A	703	810	780	773	87	-77	0.425	0
2609	7	7	7	LEA	LEA	633	646	858	843	144	-225	-1.368	0
2609	7	8	7	LEA	LEA	713	723	922	923	73	-209	-2.74	0
2609	7	9	7	LENTIL	LENTIL	837	849	951	944	141	-114	-0.674	0
2609	7	10	7	LENTIL	LENTIL	865	887	932	927	102	-67	-0.392	0
2609	7	11	7	Lotus	Lotus	622	667	988	971	97	-366	-3.134	0
2609	7	12	7	Lotus	Lotus	625	640	950	935	103	-325	-2.864	0
2609	7	1	8	LSL-N	LSL-N	754	798	914	870	137	-160	-0.526	0
2609	7	2	8	LSL-N	LSL-N	978	1022	839	802	172	139	1.279	0
2609	7	3	8	MAA; MAL	MAA; MAL	2392	2210	911	912	109	1481	11.908	0
2609	7	4	8	MAA; MAL	MAA; MAL	2333	2191	837	821	137	1496	10	0
2609	7	5	8	MALECTIN	MALECTIN	775	770	749	750	139	26	0.144	0
2609	7	6	8	MALECTIN	MALECTIN	605	594	699	685	99	-94	-0.919	0
2609	7	7	8	MOA	MOA	413	477	851	836	126	-438	-2.849	0
2609	7	8	8	MOA	MOA	426	493	818	804	106	-392	-2.934	0
2609	7	9	8	MPL; MPA	MPL; MPA	966	942	851	837	138	115	0.761	0
2609	7	10	8	MPL; MPA	MPL; MPA	1067	1051	905	882	117	162	1.444	0
2609	7	11	8	NPA	NPA	6564	6126	870	851	143	5694	36.888	0
2609	7	12	8	NPA	NPA	8902	8032	925	886	138	7977	51.783	0
2609	7	1	9	ORYSATA	ORYSATA	659	640	923	908	88	-264	-3.045	0
2609	7	2	9	ORYSATA	ORYSATA	585	571	877	846	146	-292	-1.884	0
2609	7	3	9	PA-IIL	PA-IIL	506	460	803	800	149	-297	-2.282	0
2609	7	4	9	PA-IIL	PA-IIL	485	504	818	796	129	-333	-2.264	0
2609	7	5	9	PA-IL	PA-IL	481	484	805	786	155	-324	-1.948	0
2609	7	6	9	PA-IL	PA-IL	572	555	778	762	132	-206	-1.568	0
2609	7	7	9	PALa	PALa	416	781	786	784	117	-370	-0.026	0
2609	7	8	9	PALa	PALa	793	1340	846	838	112	-53	4.482	0
2609	7	9	9	PHA-E	PHA-E	963	957	877	900	755	86	0.075	0
2609	7	10	9	PHA-E	PHA-E	1973	1938	827	836	125	1146	8.816	0
2609	7	11	9	PHA-L	PHA-L	817	841	840	831	242	-23	0.041	0
2609	7	12	9	PHA-L	PHA-L	726	766	896	854	162	-170	-0.543	0
2609	7	1	10	PHA-P	PHA-P	739	765	962	952	123	-223	-1.52	0
2609	7	2	10	PHA-P	PHA-P	791	770	862	818	187	-71	-0.257	0
2609	7	3	10	PNA	PNA	443	474	863	859	138	-420	-2.79	0
2609	7	4	10	PNA	PNA	554	582	914	879	130	-360	-2.285	0
2609	7	5	10	PPL	PPL	671	655	892	858	172	-221	-1.18	0
2609	7	6	10	PPL	PPL	671	679	914	893	95	-243	-2.253	0
2609	7	7	10	PSA/PEA	PSA/PEA	826	865	911	890	102	-85	-0.245	0
2609	7	8	10	PSA/PEA	PSA/PEA	809	829	851	845	121	-42	-0.132	0
2609	7	9	10	PSL1A	PSL1A	963	2027	924	918	106	39	10.462	0
2609	7	10	10	PSL1A	PSL1A	1044	1473	967	923	156	77	3.526	0
2609	7	11	10	PTL	PTL	958	949	861	845	163	97	0.638	0
2609	7	12	10	PTL	PTL	856	866	865	846	154	-9	0.13	0
2609	7	1	11	RS-FUC	RS-FUC	634	561	891	888	73	-257	-4.479	0
2609	7	2	11	RS-FUC	RS-FUC	595	556	855	824	143	-260	-1.874	0
2609	7	3	11	SAMB	SAMB	9404	8157	940	940	72	8464	100.236	0
2609	7	4	11	SAMB	SAMB	9963	8954	940	916	127	9023	63.291	0
2609	7	5	11	SBA	SBA	485	546	867	847	113	-382	-2.664	0
2609	7	6	11	SBA	SBA	461	523	918	882	124	-457	-2.895	0
2609	7	7	11	SJA	SJA	556	586	935	934	91	-379	-3.824	0
2609	7	8	11	SJA	SJA	717	692	896	889	90	-179	-2.189	0
2609	7	9	11	SNA-I	SNA-I	1317	1316	848	845	263	469	1.791	0
2609	7	10	11	SNA-I	SNA-I	1781	1863	857	844	114	924	8.939	0
2609	7	11	11	SNA-II	SNA-II	602	624	966	948	99	-364	-3.273	0
2609	7	12	11	SNA-II	SNA-II	646	678	819	835	135	-173	-1.163	0
2609	7	1	12	STL	STL	1830	1875	838	837	104	992	9.981	0
2609	7	2	12	STL	STL	1501	1517	840	790	156	661	4.66	0
2609	7	3	12	UDA	UDA	562	577	904	863	128	-342	-2.234	0
2609	7	4	12	UDA	UDA	727	721	929	914	87	-202	-2.218	0
2609	7	5	12	UEA I	UEA I	656	676	904	888	107	-248	-1.981	0
2609	7	6	12	UEA I	UEA I	728	739	892	862	139	-164	-0.885	0
2609	7	7	12	UEA-II	UEA-II	762	779	956	957	59	-194	-3.017	0
2609	7	8	12	UEA-II	UEA-II	799	1090	943	960	957	-144	0.136	0
2609	7	9	12	VFA	VFA	771	792	951	933	103	-180	-1.369	0
2609	7	10	12	VFA	VFA	778	804	869	866	133	-91	-0.466	0
2609	7	11	12	VVA	VVA	9399	8671	917	914	255	8482	30.42	0
2609	7	12	12	VVA	VVA	8594	8030	865	857	141	7729	50.872	0
2609	7	1	13	WFA	WFA	376	496	894	884	83	-518	-4.675	0
2609	7	2	13	WFA	WFA	509	547	871	839	127	-362	-2.299	0
2609	7	3	13	WGA	WGA	928	937	943	941	67	-15	-0.06	0
2609	7	4	13	WGA	WGA	1021	1002	930	919	83	91	1	0
2609	7	5	13	NEG	NEG	216	323	915	904	78	-699	-7.449	0
2609	7	6	13	NEG	NEG	269	360	949	926	104	-680	-5.442	0
2609	7	7	13	NEG	NEG	236	401	987	948	131	-751	-4.176	0
2609	7	8	13	NEG	NEG	287	384	979	946	124	-692	-4.532	0
2609	7	9	13	POS2	POS2	6789	7367	986	962	105	5803	61	0
2609	7	10	13	POS2	POS2	8129	7893	946	899	153	7183	45.712	0
2609	7	11	13	POS1	POS1	23096	20445	942	906	193	22154	101.238	0
2609	7	12	13	POS1	POS1	25331	22584	884	868	144	24447	150.806	0
3103	8	1	1	POS1	POS1	18702	15215	1385	1357	136	17317	101.897	0
3103	8	2	1	POS1	POS1	21146	17000	1455	1455	55	19691	282.636	0
3103	8	3	1	POS2	POS2	2503	3182	1476	1471	75	1027	22.813	0
3103	8	4	1	POS2	POS2	2604	3689	1565	1545	108	1039	19.852	0
3103	8	5	1	NEG	NEG	186	659	1589	1564	153	-1403	-5.915	0
3103	8	6	1	NEG	NEG	182	741	1570	1559	78	-1388	-10.487	0
3103	8	7	1	NEG	NEG	186	749	1552	1544	134	-1366	-5.933	0
3103	8	8	1	NEG	NEG	211	640	1632	1631	68	-1421	-14.574	0
3103	8	9	1	AAA	AAA	1071	1081	1534	1452	235	-463	-1.579	0
3103	8	10	1	AAA	AAA	1174	1263	1755	1738	119	-581	-3.992	0
3103	8	11	1	AAL	AAL	2015	2000	1856	1829	120	159	1.425	0
3103	8	12	1	AAL	AAL	2121	2176	2000	1997	87	121	2.057	0
3103	8	1	2	ACG	ACG	1888	1867	1431	1422	90	457	4.944	0
3103	8	2	2	ACG	ACG	1702	1682	1483	1488	75	219	2.587	0
3103	8	3	2	ACL	ACL	747	802	1475	1471	86	-728	-7.779	0
3103	8	4	2	ACL	ACL	792	830	1525	1510	114	-733	-5.965	0
3103	8	5	2	ASA	ASA	9827	9138	1562	1529	213	8265	35.723	0
3103	8	6	2	ASA	ASA	12326	10247	1575	1568	104	10751	83.452	0
3103	8	7	2	BANLEC	BANLEC	6097	6135	1573	1563	115	4524	39.757	0
3103	8	8	2	BANLEC	BANLEC	8450	7831	1678	1677	81	6772	75.975	0
3103	8	9	2	BC2L-A	BC2L-A	2580	2542	1637	1547	239	943	4.163	0
3103	8	10	2	BC2L-A	BC2L-A	2677	2329	1806	1808	83	871	6.277	0
3103	8	11	2	BC2LCN	BC2LCN	1609	1611	1853	1826	138	-244	-1.558	0
3103	8	12	2	BC2LCN	BC2LCN	1690	1725	2024	1964	260	-334	-0.919	0
3103	8	1	3	BPA; BPL	BPA; BPL	953	957	1396	1390	88	-443	-4.92	0
3103	8	2	3	BPA; BPL	BPA; BPL	1080	1115	1487	1486	57	-407	-6.509	0
3103	8	3	3	CALSEPA	CALSEPA	5473	12329	1427	1417	104	4046	104.923	0
3103	8	4	3	CALSEPA	CALSEPA	8447	14167	1507	1495	223	6940	56.825	0
3103	8	5	3	CGL2	CGL2	1520	2104	1562	1530	157	-42	3.656	0
3103	8	6	3	CGL2	CGL2	1653	2227	1595	1587	83	58	7.711	0
3103	8	7	3	CNL	CNL	1546	1310	1574	1561	132	-28	-1.902	0
3103	8	8	3	CNL	CNL	1573	1309	1707	1712	67	-134	-6.015	0
3103	8	9	3	Con A	Con A	1654	1625	1751	1700	225	-97	-0.333	0
3103	8	10	3	Con A	Con A	1182	1248	1843	1844	98	-661	-6.082	0
3103	8	11	3	DBA	DBA	1220	1334	1880	1846	154	-660	-3.325	0
3103	8	12	3	DBA	DBA	1243	1491	2078	2085	91	-835	-6.527	0
3103	8	1	4	DISCOIDIN I	DISCOIDIN I	332	513	1389	1379	87	-1057	-9.954	0
3103	8	2	4	DISCOIDIN I	DISCOIDIN I	328	424	1466	1470	160	-1138	-6.537	0
3103	8	3	4	DISCOIDIN II	DISCOIDIN II	917	968	1468	1463	107	-551	-4.626	0
3103	8	4	4	DISCOIDIN II	DISCOIDIN II	738	849	1502	1487	110	-764	-5.8	0
3103	8	5	4	DSA	DSA	5950	5445	1520	1489	150	4430	26.373	0
3103	8	6	4	DSA	DSA	5789	5452	1569	1567	131	4220	29.656	0
3103	8	7	4	ECA	ECA	796	796	1588	1590	76	-792	-10.447	0
3103	8	8	4	ECA	ECA	854	858	1691	1675	120	-837	-6.808	0
3103	8	9	4	EEL	EEL	1048	1197	1804	1740	221	-756	-2.457	0
3103	8	10	4	EEL	EEL	1041	1129	1895	1900	68	-854	-11.338	0
3103	8	11	4	F17AG	F17AG	1268	1285	1943	1914	138	-675	-4.558	0
3103	8	12	4	F17AG	F17AG	1355	1373	2089	2100	134	-734	-5.425	0
3103	8	1	5	GAL1	GAL1	281	574	1343	1337	81	-1062	-9.42	0
3103	8	2	5	GAL1	GAL1	299	583	1435	1436	55	-1136	-15.509	0
3103	8	3	5	GAL1-S	GAL1-S	178	349	1451	1443	201	-1273	-5.443	0
3103	8	4	5	GAL1-S	GAL1-S	175	344	1490	1472	104	-1315	-10.846	0
3103	8	5	5	GAL2	GAL2	818	834	1527	1499	148	-709	-4.493	0
3103	8	6	5	GAL2	GAL2	1013	1023	1568	1555	85	-555	-6.259	0
3103	8	7	5	GAL3	GAL3	83	249	1575	1550	133	-1492	-9.782	0
3103	8	8	5	GAL3	GAL3	242	525	1724	1704	133	-1482	-8.865	0
3103	8	9	5	GAL3C-S	GAL3C-S	1824	1808	1773	1718	208	51	0.433	0
3103	8	10	5	GAL3C-S	GAL3C-S	1861	1878	1827	1812	122	34	0.541	0
3103	8	11	5	GAL7-S	GAL7-S	1723	1638	1883	1848	151	-160	-1.391	0
3103	8	12	5	GAL7-S	GAL7-S	1733	1675	2028	2020	136	-295	-2.537	0
3103	8	1	6	GAL9	GAL9	225	451	1290	1290	94	-1065	-8.926	0
3103	8	2	6	GAL9	GAL9	277	502	1409	1413	88	-1132	-10.352	0
3103	8	3	6	GNA	GNA	29793	28942	1427	1426	93	28366	295.871	0
3103	8	4	6	GNA	GNA	27498	26051	1460	1446	96	26038	256.302	0
3103	8	5	6	GRFT	GRFT	5803	8024	1500	1467	179	4303	36.631	0
3103	8	6	6	GRFT	GRFT	6063	8452	1537	1535	110	4526	62.882	0
3103	8	7	6	GS-I;?GSL-I	GS-I;?GSL-I	1507	1498	1581	1546	139	-74	-0.345	0
3103	8	8	6	GS-I;?GSL-I	GS-I;?GSL-I	1533	2383	1728	1719	87	-195	7.632	0
3103	8	9	6	GS-II; GSL-II	GS-II; GSL-II	1201	1211	1711	1617	244	-510	-1.664	0
3103	8	10	6	GS-II; GSL-II	GS-II; GSL-II	600	757	1836	1788	226	-1236	-4.562	0
3103	8	11	6	HHA; HHL	HHA; HHL	18145	15107	1945	1919	137	16200	96.263	0
3103	8	12	6	HHA; HHL	HHA; HHL	16928	14479	2087	2086	76	14841	163.066	0
3103	8	1	7	Jacalin	Jacalin	1014	1011	1181	1184	184	-167	-0.94	0
3103	8	2	7	Jacalin	Jacalin	1172	1183	1365	1378	150	-193	-1.3	0
3103	8	3	7	LBA	LBA	1063	1080	1434	1445	147	-371	-2.483	0
3103	8	4	7	LBA	LBA	1253	1261	1435	1439	125	-182	-1.424	0
3103	8	5	7	LcH A	LcH A	1349	1393	1483	1466	166	-134	-0.44	0
3103	8	6	7	LcH A	LcH A	1321	1392	1443	1443	119	-122	-0.429	0
3103	8	7	7	LEA	LEA	1277	1301	1552	1542	112	-275	-2.152	0
3103	8	8	7	LEA	LEA	1365	1389	1695	1690	97	-330	-3.103	0
3103	8	9	7	LENTIL	LENTIL	1679	1773	1790	1725	224	-111	0.214	0
3103	8	10	7	LENTIL	LENTIL	1755	1804	1887	1885	83	-132	-0.976	0
3103	8	11	7	Lotus	Lotus	1260	1284	1864	1856	171	-604	-3.345	0
3103	8	12	7	Lotus	Lotus	1445	1457	2105	2104	84	-660	-7.702	0
3103	8	1	8	LSL-N	LSL-N	1867	1897	1390	1571	2952	477	0.11	0
3103	8	2	8	LSL-N	LSL-N	1740	1774	1432	1456	144	308	2.208	0
3103	8	3	8	MAA; MAL	MAA; MAL	6937	6171	1500	1507	147	5437	31.728	0
3103	8	4	8	MAA; MAL	MAA; MAL	7056	6259	1542	1542	144	5514	32.757	0
3103	8	5	8	MALECTIN	MALECTIN	1464	1385	1496	1483	180	-32	-0.544	0
3103	8	6	8	MALECTIN	MALECTIN	1189	1176	1326	1324	93	-137	-1.591	0
3103	8	7	8	MOA	MOA	570	653	1460	1453	108	-890	-7.407	0
3103	8	8	8	MOA	MOA	575	711	1614	1612	100	-1039	-9.01	0
3103	8	9	8	MPL; MPA	MPL; MPA	2028	1982	1699	1637	231	329	1.494	0
3103	8	10	8	MPL; MPA	MPL; MPA	2527	2357	1813	1788	139	714	4.094	0
3103	8	11	8	NPA	NPA	10828	9423	1874	1852	184	8954	41.147	0
3103	8	12	8	NPA	NPA	10261	8855	2077	2072	90	8184	75.367	0
3103	8	1	9	ORYSATA	ORYSATA	1460	1360	1464	1486	168	-4	-0.75	0
3103	8	2	9	ORYSATA	ORYSATA	1423	1302	1537	1564	152	-114	-1.724	0
3103	8	3	9	PA-IIL	PA-IIL	952	1054	1543	1570	166	-591	-3.108	0
3103	8	4	9	PA-IIL	PA-IIL	893	977	1533	1543	168	-640	-3.369	0
3103	8	5	9	PA-IL	PA-IL	1104	1025	1515	1493	164	-411	-2.854	0
3103	8	6	9	PA-IL	PA-IL	1262	1132	1440	1436	126	-178	-2.413	0
3103	8	7	9	PALa	PALa	1494	2225	1598	1606	137	-104	4.518	0
3103	8	8	9	PALa	PALa	1511	2934	1588	1589	116	-77	11.595	0
3103	8	9	9	PHA-E	PHA-E	2916	2786	1660	1616	198	1256	5.909	0
3103	8	10	9	PHA-E	PHA-E	3967	3708	1738	1724	159	2229	12.478	0
3103	8	11	9	PHA-L	PHA-L	1393	1445	1879	1862	152	-486	-2.743	0
3103	8	12	9	PHA-L	PHA-L	942	1023	1991	1992	102	-1049	-9.5	0
3103	8	1	10	PHA-P	PHA-P	1522	1540	1536	1554	161	-14	-0.087	0
3103	8	2	10	PHA-P	PHA-P	1484	1482	1524	1538	152	-40	-0.368	0
3103	8	3	10	PNA	PNA	1070	1088	1544	1559	214	-474	-2.201	0
3103	8	4	10	PNA	PNA	1153	1178	1604	1608	203	-451	-2.118	0
3103	8	5	10	PPL	PPL	1291	1320	1603	1597	241	-312	-1.149	0
3103	8	6	10	PPL	PPL	1100	1149	1544	1585	315	-444	-1.384	0
3103	8	7	10	PSA/PEA	PSA/PEA	1723	1824	1707	1773	1722	16	0.03	0
3103	8	8	10	PSA/PEA	PSA/PEA	1791	1866	1773	1769	112	18	0.866	0
3103	8	9	10	PSL1A	PSL1A	1534	3204	1847	1799	208	-313	6.755	0
3103	8	10	10	PSL1A	PSL1A	2469	5128	1953	1959	79	516	40.114	0
3103	8	11	10	PTL	PTL	2135	2167	1996	1967	139	139	1.439	0
3103	8	12	10	PTL	PTL	2205	2202	2130	2140	270	75	0.23	0
3103	8	1	11	RS-FUC	RS-FUC	1361	1173	1547	1568	161	-186	-2.453	0
3103	8	2	11	RS-FUC	RS-FUC	1172	1168	1527	1532	72	-355	-5.056	0
3103	8	3	11	SAMB	SAMB	18269	17138	1550	1553	100	16719	155.85	0
3103	8	4	11	SAMB	SAMB	20569	19153	1643	1656	154	18926	113.617	0
3103	8	5	11	SBA	SBA	792	865	1596	1591	209	-804	-3.474	0
3103	8	6	11	SBA	SBA	883	1016	1616	1613	137	-733	-4.358	0
3103	8	7	11	SJA	SJA	1162	1208	1716	1707	162	-554	-3.08	0
3103	8	8	11	SJA	SJA	1418	1408	1830	1823	107	-412	-3.879	0
3103	8	9	11	SNA-I	SNA-I	4284	4127	1879	1805	236	2405	9.839	0
3103	8	10	11	SNA-I	SNA-I	6231	5594	2018	2021	87	4213	41.069	0
3103	8	11	11	SNA-II	SNA-II	1519	1518	2059	2030	153	-540	-3.346	0
3103	8	12	11	SNA-II	SNA-II	2002	1999	2205	2215	136	-203	-1.588	0
3103	8	1	12	STL	STL	3146	3275	1511	1520	121	1635	14.504	0
3103	8	2	12	STL	STL	3637	3665	1540	1542	79	2097	26.873	0
3103	8	3	12	UDA	UDA	1205	1241	1563	1556	93	-358	-3.387	0
3103	8	4	12	UDA	UDA	1345	1321	1604	1596	140	-259	-1.964	0
3103	8	5	12	UEA I	UEA I	2212	2121	1589	1563	159	623	3.509	0
3103	8	6	12	UEA I	UEA I	2631	2580	1613	1609	115	1018	8.443	0
3103	8	7	12	UEA-II	UEA-II	1576	1584	1731	1730	152	-155	-0.961	0
3103	8	8	12	UEA-II	UEA-II	1631	1650	1838	1866	149	-207	-1.45	0
3103	8	9	12	VFA	VFA	1552	1609	1935	1868	245	-383	-1.057	0
3103	8	10	12	VFA	VFA	1819	1816	2057	2062	91	-238	-2.703	0
3103	8	11	12	VVA	VVA	9478	8743	2129	2089	160	7349	41.588	0
3103	8	12	12	VVA	VVA	6765	6498	2260	2285	238	4505	17.702	0
3103	8	1	13	WFA	WFA	962	1041	1475	1471	89	-513	-4.831	0
3103	8	2	13	WFA	WFA	751	886	1570	1568	74	-819	-9.216	0
3103	8	3	13	WGA	WGA	1593	1583	1587	1582	75	6	0.013	0
3103	8	4	13	WGA	WGA	1587	1560	1600	1570	118	-13	-0.085	0
3103	8	5	13	NEG	NEG	104	311	1515	1386	366	-1411	-2.937	0
3103	8	6	13	NEG	NEG	190	393	1611	1597	99	-1421	-12.162	0
3103	8	7	13	NEG	NEG	292	463	1717	1709	138	-1425	-9.029	0
3103	8	8	13	NEG	NEG	288	436	1836	1836	104	-1548	-13.462	0
3103	8	9	13	POS2	POS2	7434	6835	1904	1862	228	5530	21.811	0
3103	8	10	13	POS2	POS2	9053	8063	2079	2083	80	6974	74.75	0
3103	8	11	13	POS1	POS1	23739	20908	2156	2114	162	21583	116.012	0
3103	8	12	13	POS1	POS1	25251	21728	2293	2310	132	22958	147.106	0
2612	9	1	1	POS1	POS1	19154	15323	926	926	52	18228	276.865	0
2612	9	2	1	POS1	POS1	22441	17330	901	873	120	21540	137.142	0
2612	9	3	1	POS2	POS2	2689	3252	926	924	52	1763	44.769	0
2612	9	4	1	POS2	POS2	2665	3723	902	897	62	1763	45.581	0
2612	9	5	1	NEG	NEG	203	547	893	885	61	-690	-5.541	0
2612	9	6	1	NEG	NEG	213	626	835	831	68	-622	-3.015	0
2612	9	7	1	NEG	NEG	192	481	860	859	66	-668	-5.727	0
2612	9	8	1	NEG	NEG	256	652	925	924	62	-669	-4.387	0
2612	9	9	1	AAA	AAA	671	708	960	961	64	-289	-3.953	0
2612	9	10	1	AAA	AAA	531	583	974	965	72	-443	-5.306	0
2612	9	11	1	AAL	AAL	688	737	992	973	92	-304	-2.565	0
2612	9	12	1	AAL	AAL	737	769	1000	990	66	-263	-3.348	0
2612	9	1	2	ACG	ACG	695	696	917	915	50	-222	-4.38	0
2612	9	2	2	ACG	ACG	602	618	901	875	218	-299	-1.179	0
2612	9	3	2	ACL	ACL	289	356	924	920	52	-635	-10.846	0
2612	9	4	2	ACL	ACL	308	367	931	926	68	-623	-8.221	0
2612	9	5	2	ASA	ASA	6414	5952	905	878	116	5509	43.741	0
2612	9	6	2	ASA	ASA	9395	7674	856	848	70	8539	97.514	0
2612	9	7	2	BANLEC	BANLEC	3297	3375	867	870	69	2430	36.304	0
2612	9	8	2	BANLEC	BANLEC	4196	4239	917	915	51	3279	65.176	0
2612	9	9	2	BC2L-A	BC2L-A	1711	1598	947	943	56	764	11.696	0
2612	9	10	2	BC2L-A	BC2L-A	1645	1476	976	969	74	669	6.851	0
2612	9	11	2	BC2LCN	BC2LCN	922	917	995	986	93	-73	-0.742	0
2612	9	12	2	BC2LCN	BC2LCN	759	757	1007	997	64	-248	-3.75	0
2612	9	1	3	BPA; BPL	BPA; BPL	592	602	921	921	48	-329	-6.646	0
2612	9	2	3	BPA; BPL	BPA; BPL	655	664	899	878	214	-244	-1	0
2612	9	3	3	CALSEPA	CALSEPA	1778	5439	927	928	55	851	82.018	0
2612	9	4	3	CALSEPA	CALSEPA	2360	5714	932	927	103	1428	46.476	0
2612	9	5	3	CGL2	CGL2	1041	1266	911	908	59	130	6.068	0
2612	9	6	3	CGL2	CGL2	1154	1553	858	852	67	296	10.463	0
2612	9	7	3	CNL	CNL	604	644	895	899	60	-291	-4.25	0
2612	9	8	3	CNL	CNL	790	724	927	932	149	-137	-1.396	0
2612	9	9	3	Con A	Con A	849	848	963	958	84	-114	-1.31	0
2612	9	10	3	Con A	Con A	993	1002	987	976	77	6	0.338	0
2612	9	11	3	DBA	DBA	949	971	995	978	88	-46	-0.08	0
2612	9	12	3	DBA	DBA	951	972	1010	1002	63	-59	-0.476	0
2612	9	1	4	DISCOIDIN I	DISCOIDIN I	414	459	896	891	69	-482	-6.261	0
2612	9	2	4	DISCOIDIN I	DISCOIDIN I	767	588	876	820	176	-109	-1.318	0
2612	9	3	4	DISCOIDIN II	DISCOIDIN II	383	469	914	916	53	-531	-8.434	0
2612	9	4	4	DISCOIDIN II	DISCOIDIN II	357	461	917	1181	3853	-560	-0.187	0
2612	9	5	4	DSA	DSA	2598	2425	896	893	59	1702	25.966	0
2612	9	6	4	DSA	DSA	2359	2223	855	851	151	1504	9.086	0
2612	9	7	4	ECA	ECA	438	3421	865	866	43	-427	59.419	0
2612	9	8	4	ECA	ECA	535	3625	929	930	52	-394	51.827	0
2612	9	9	4	EEL	EEL	872	877	969	964	60	-97	-1.45	0
2612	9	10	4	EEL	EEL	896	895	996	990	93	-100	-1.022	0
2612	9	11	4	F17AG	F17AG	654	673	1003	988	85	-349	-3.706	0
2612	9	12	4	F17AG	F17AG	654	670	1012	1002	78	-358	-4.256	0
2612	9	1	5	GAL1	GAL1	98	381	886	885	43	-788	-11.721	0
2612	9	2	5	GAL1	GAL1	143	376	867	843	118	-724	-3.958	0
2612	9	3	5	GAL1-S	GAL1-S	126	317	913	913	42	-787	-14.19	0
2612	9	4	5	GAL1-S	GAL1-S	212	353	916	910	61	-704	-9.131	0
2612	9	5	5	GAL2	GAL2	508	509	907	904	61	-399	-6.475	0
2612	9	6	5	GAL2	GAL2	541	546	855	847	69	-314	-4.362	0
2612	9	7	5	GAL3	GAL3	107	282	863	860	83	-756	-6.964	0
2612	9	8	5	GAL3	GAL3	135	341	938	930	114	-803	-5.167	0
2612	9	9	5	GAL3C-S	GAL3C-S	946	956	962	962	101	-16	-0.059	0
2612	9	10	5	GAL3C-S	GAL3C-S	950	937	988	985	89	-38	-0.539	0
2612	9	11	5	GAL7-S	GAL7-S	796	750	989	976	76	-193	-2.974	0
2612	9	12	5	GAL7-S	GAL7-S	920	868	1014	1007	92	-94	-1.511	0
2612	9	1	6	GAL9	GAL9	121	276	876	877	59	-755	-10.186	0
2612	9	2	6	GAL9	GAL9	142	293	850	821	115	-708	-4.591	0
2612	9	3	6	GNA	GNA	18628	18340	862	863	45	17766	388.378	0
2612	9	4	6	GNA	GNA	18221	17702	868	862	57	17353	295.439	0
2612	9	5	6	GRFT	GRFT	3479	5322	880	872	65	2599	68.462	0
2612	9	6	6	GRFT	GRFT	3892	5491	841	828	77	3051	60.558	0
2612	9	7	6	GS-I;?GSL-I	GS-I;?GSL-I	659	651	854	824	126	-195	-1.373	0
2612	9	8	6	GS-I;?GSL-I	GS-I;?GSL-I	765	737	928	927	60	-163	-3.167	0
2612	9	9	6	GS-II; GSL-II	GS-II; GSL-II	820	829	955	951	65	-135	-1.877	0
2612	9	10	6	GS-II; GSL-II	GS-II; GSL-II	470	520	975	966	64	-505	-6.969	0
2612	9	11	6	HHA; HHL	HHA; HHL	15605	13041	979	966	85	14626	142.059	0
2612	9	12	6	HHA; HHL	HHA; HHL	14596	12279	995	985	62	13601	182.161	0
2612	9	1	7	Jacalin	Jacalin	589	631	830	843	420	-241	-0.505	0
2612	9	2	7	Jacalin	Jacalin	546	583	796	771	110	-250	-1.709	0
2612	9	3	7	LBA	LBA	555	566	824	824	45	-269	-5.733	0
2612	9	4	7	LBA	LBA	440	455	801	799	49	-361	-7.02	0
2612	9	5	7	LcH A	LcH A	580	609	752	760	91	-172	-1.659	0
2612	9	6	7	LcH A	LcH A	563	604	737	724	72	-174	-1.667	0
2612	9	7	7	LEA	LEA	520	532	830	828	52	-310	-5.692	0
2612	9	8	7	LEA	LEA	567	585	876	876	56	-309	-5.196	0
2612	9	9	7	LENTIL	LENTIL	714	761	931	928	58	-217	-2.879	0
2612	9	10	7	LENTIL	LENTIL	795	802	951	939	68	-156	-2.015	0
2612	9	11	7	Lotus	Lotus	625	643	957	946	77	-332	-3.935	0
2612	9	12	7	Lotus	Lotus	671	674	993	983	66	-322	-4.682	0
2612	9	1	8	LSL-N	LSL-N	870	890	838	837	85	32	0.624	0
2612	9	2	8	LSL-N	LSL-N	827	831	715	668	175	112	0.931	0
2612	9	3	8	MAA; MAL	MAA; MAL	2522	2233	828	806	107	1694	13.336	0
2612	9	4	8	MAA; MAL	MAA; MAL	2436	2189	837	840	72	1599	18.736	0
2612	9	5	8	MALECTIN	MALECTIN	664	663	735	732	59	-71	-1.169	0
2612	9	6	8	MALECTIN	MALECTIN	548	542	636	628	81	-88	-1.062	0
2612	9	7	8	MOA	MOA	377	441	816	817	48	-439	-7.833	0
2612	9	8	8	MOA	MOA	423	483	859	859	54	-436	-6.963	0
2612	9	9	8	MPL; MPA	MPL; MPA	1072	1064	908	905	56	164	2.839	0
2612	9	10	8	MPL; MPA	MPL; MPA	1204	1163	940	928	73	264	3.219	0
2612	9	11	8	NPA	NPA	8482	7597	954	938	82	7528	81.207	0
2612	9	12	8	NPA	NPA	8438	7549	956	949	63	7482	104.762	0
2612	9	1	9	ORYSATA	ORYSATA	635	673	920	924	47	-285	-5.34	0
2612	9	2	9	ORYSATA	ORYSATA	564	564	899	870	119	-335	-2.571	0
2612	9	3	9	PA-IIL	PA-IIL	640	573	899	874	151	-259	-1.993	0
2612	9	4	9	PA-IIL	PA-IIL	848	677	882	862	129	-34	-1.434	0
2612	9	5	9	PA-IL	PA-IL	410	398	793	794	54	-383	-7.333	0
2612	9	6	9	PA-IL	PA-IL	386	427	763	753	85	-377	-3.835	0
2612	9	7	9	PALa	PALa	695	1621	815	815	44	-120	18.318	0
2612	9	8	9	PALa	PALa	647	1253	854	852	42	-207	9.548	0
2612	9	9	9	PHA-E	PHA-E	1452	1470	872	869	46	580	13.065	0
2612	9	10	9	PHA-E	PHA-E	1747	1780	899	889	66	848	13.5	0
2612	9	11	9	PHA-L	PHA-L	609	635	920	908	74	-311	-3.689	0
2612	9	12	9	PHA-L	PHA-L	719	747	914	908	64	-195	-2.516	0
2612	9	1	10	PHA-P	PHA-P	585	619	947	957	79	-362	-4.278	0
2612	9	2	10	PHA-P	PHA-P	877	815	929	881	164	-52	-0.402	0
2612	9	3	10	PNA	PNA	443	487	939	939	57	-496	-7.93	0
2612	9	4	10	PNA	PNA	445	494	909	908	70	-464	-5.914	0
2612	9	5	10	PPL	PPL	724	706	862	861	59	-138	-2.627	0
2612	9	6	10	PPL	PPL	575	593	797	758	139	-222	-1.187	0
2612	9	7	10	PSA/PEA	PSA/PEA	636	663	769	760	99	-133	-0.98	0
2612	9	8	10	PSA/PEA	PSA/PEA	863	884	836	825	87	27	0.678	0
2612	9	9	10	PSL1A	PSL1A	921	1529	930	922	62	-9	9.79	0
2612	9	10	10	PSL1A	PSL1A	1014	1783	954	947	66	60	12.667	0
2612	9	11	10	PTL	PTL	1029	1011	965	948	85	64	0.741	0
2612	9	12	10	PTL	PTL	1086	1058	977	966	65	109	1.415	0
2612	9	1	11	RS-FUC	RS-FUC	746	657	992	1002	90	-246	-3.833	0
2612	9	2	11	RS-FUC	RS-FUC	659	590	949	931	131	-290	-2.603	0
2612	9	3	11	SAMB	SAMB	9085	8432	980	992	97	8105	76.701	0
2612	9	4	11	SAMB	SAMB	9055	8472	949	962	103	8106	72.913	0
2612	9	5	11	SBA	SBA	606	625	878	877	70	-272	-3.6	0
2612	9	6	11	SBA	SBA	636	656	910	903	89	-274	-2.775	0
2612	9	7	11	SJA	SJA	581	623	956	953	65	-375	-5.077	0
2612	9	8	11	SJA	SJA	672	675	965	960	59	-293	-4.831	0
2612	9	9	11	SNA-I	SNA-I	1998	1898	992	988	50	1006	18.2	0
2612	9	10	11	SNA-I	SNA-I	2360	2163	988	975	73	1372	16.274	0
2612	9	11	11	SNA-II	SNA-II	903	892	994	978	93	-91	-0.925	0
2612	9	12	11	SNA-II	SNA-II	820	818	1002	992	67	-182	-2.597	0
2612	9	1	12	STL	STL	1396	1386	1019	1034	90	377	3.911	0
2612	9	2	12	STL	STL	1319	1376	987	971	166	332	2.44	0
2612	9	3	12	UDA	UDA	752	727	988	994	96	-236	-2.781	0
2612	9	4	12	UDA	UDA	729	701	939	940	92	-210	-2.598	0
2612	9	5	12	UEA I	UEA I	1090	1067	879	878	104	211	1.817	0
2612	9	6	12	UEA I	UEA I	1182	1166	952	947	97	230	2.258	0
2612	9	7	12	UEA-II	UEA-II	771	797	976	976	70	-205	-2.557	0
2612	9	8	12	UEA-II	UEA-II	804	819	992	990	50	-188	-3.42	0
2612	9	9	12	VFA	VFA	809	815	1005	1001	53	-196	-3.509	0
2612	9	10	12	VFA	VFA	880	894	1018	1010	100	-138	-1.16	0
2612	9	11	12	VVA	VVA	7571	7027	1004	988	92	6567	65.641	0
2612	9	12	12	VVA	VVA	7847	7023	1023	1013	72	6824	83.472	0
2612	9	1	13	WFA	WFA	394	511	956	958	54	-562	-8.278	0
2612	9	2	13	WFA	WFA	440	525	921	886	124	-481	-2.911	0
2612	9	3	13	WGA	WGA	825	817	938	944	100	-113	-1.27	0
2612	9	4	13	WGA	WGA	920	911	963	965	105	-43	-0.514	0
2612	9	5	13	NEG	NEG	93	270	900	897	56	-807	-11.196	0
2612	9	6	13	NEG	NEG	101	298	911	898	85	-810	-7.059	0
2612	9	7	13	NEG	NEG	166	367	977	970	82	-811	-7.354	0
2612	9	8	13	NEG	NEG	267	404	992	981	85	-725	-6.788	0
2612	9	9	13	POS2	POS2	7364	7158	1016	1010	53	6348	116	0
2612	9	10	13	POS2	POS2	8309	7809	1032	1021	64	7277	106.063	0
2612	9	11	13	POS1	POS1	24041	22628	1020	1004	102	23021	212	0
2612	9	12	13	POS1	POS1	25369	22485	1031	1017	70	24338	306.686	0
3104	10	1	1	POS1	POS1	19376	15795	1862	1854	242	17514	57.607	0
3104	10	2	1	POS1	POS1	21732	18219	1950	1954	99	19782	164.293	0
3104	10	3	1	POS2	POS2	2632	3486	1981	1971	98	651	15.459	0
3104	10	4	1	POS2	POS2	2670	3991	2054	2029	130	616	15.092	0
3104	10	5	1	NEG	NEG	322	1266	2100	2060	217	-1778	-3.659	0
3104	10	6	1	NEG	NEG	570	1237	2089	2076	120	-1519	-6.992	0
3104	10	7	1	NEG	NEG	556	1054	2207	2181	156	-1651	-7.224	0
3104	10	8	1	NEG	NEG	764	1456	2387	2376	124	-1623	-7.419	0
3104	10	9	1	AAA	AAA	1627	1692	2501	2415	297	-874	-2.434	0
3104	10	10	1	AAA	AAA	1888	2009	2657	2657	85	-769	-7.624	0
3104	10	11	1	AAL	AAL	2047	2138	2693	2629	213	-646	-2.305	0
3104	10	12	1	AAL	AAL	2387	2423	2839	2850	136	-452	-3.14	0
3104	10	1	2	ACG	ACG	2055	2037	1833	1821	92	222	2.348	0
3104	10	2	2	ACG	ACG	2120	2116	1949	1952	87	171	1.885	0
3104	10	3	2	ACL	ACL	978	1085	1991	1980	118	-1013	-7.585	0
3104	10	4	2	ACL	ACL	1144	1199	2052	2028	130	-908	-6.377	0
3104	10	5	2	ASA	ASA	13162	10948	2100	2057	208	11062	42.745	0
3104	10	6	2	ASA	ASA	15376	13745	2134	2134	176	13242	65.972	0
3104	10	7	2	BANLEC	BANLEC	8401	8358	2215	2209	159	6186	38.673	0
3104	10	8	2	BANLEC	BANLEC	8748	7953	2403	2388	119	6345	46.765	0
3104	10	9	2	BC2L-A	BC2L-A	2928	2770	2491	2421	304	437	1.148	0
3104	10	10	2	BC2L-A	BC2L-A	2893	2716	2683	2695	118	210	0.178	0
3104	10	11	2	BC2LCN	BC2LCN	2593	2429	2691	2629	195	-98	-1.026	0
3104	10	12	2	BC2LCN	BC2LCN	1588	1714	2833	2832	93	-1245	-12.022	0
3104	10	1	3	BPA; BPL	BPA; BPL	1307	1316	1854	1845	119	-547	-4.445	0
3104	10	2	3	BPA; BPL	BPA; BPL	1896	1894	1962	1968	119	-66	-0.622	0
3104	10	3	3	CALSEPA	CALSEPA	5925	13755	1967	1983	401	3958	29.357	0
3104	10	4	3	CALSEPA	CALSEPA	8101	15484	2042	2019	135	6059	99.741	0
3104	10	5	3	CGL2	CGL2	2594	2790	2101	2065	208	493	3.486	0
3104	10	6	3	CGL2	CGL2	1922	2572	2117	2101	129	-195	3.651	0
3104	10	7	3	CNL	CNL	2128	1828	2207	2180	183	-79	-1.923	0
3104	10	8	3	CNL	CNL	2312	2017	2391	2394	169	-79	-2.231	0
3104	10	9	3	Con A	Con A	1214	1373	2504	2399	321	-1290	-3.196	0
3104	10	10	3	Con A	Con A	1950	1997	2675	2695	155	-725	-4.503	0
3104	10	11	3	DBA	DBA	1606	1863	2719	2659	193	-1113	-4.124	0
3104	10	12	3	DBA	DBA	1465	1815	2832	2831	82	-1367	-12.39	0
3104	10	1	4	DISCOIDIN I	DISCOIDIN I	531	840	1840	1819	122	-1309	-8.025	0
3104	10	2	4	DISCOIDIN I	DISCOIDIN I	1773	1267	1941	1873	311	-168	-1.949	0
3104	10	3	4	DISCOIDIN II	DISCOIDIN II	1281	1346	1967	1967	123	-686	-5.049	0
3104	10	4	4	DISCOIDIN II	DISCOIDIN II	1010	1121	2042	2026	143	-1032	-6.329	0
3104	10	5	4	DSA	DSA	5681	5231	2078	2039	204	3603	15.647	0
3104	10	6	4	DSA	DSA	5640	5237	2114	2100	137	3526	22.898	0
3104	10	7	4	ECA	ECA	1036	1469	2205	2207	90	-1169	-8.2	0
3104	10	8	4	ECA	ECA	995	4721	2387	2337	213	-1392	11.192	0
3104	10	9	4	EEL	EEL	1585	1679	2507	2417	320	-922	-2.306	0
3104	10	10	4	EEL	EEL	1458	1665	2663	2667	79	-1205	-12.684	0
3104	10	11	4	F17AG	F17AG	1761	1811	2689	2637	195	-928	-4.236	0
3104	10	12	4	F17AG	F17AG	1828	1892	2832	2835	77	-1004	-12.247	0
3104	10	1	5	GAL1	GAL1	330	803	1856	1843	108	-1526	-9.63	0
3104	10	2	5	GAL1	GAL1	460	866	1952	1952	210	-1492	-5.171	0
3104	10	3	5	GAL1-S	GAL1-S	1189	1164	1956	1918	527	-767	-1.431	0
3104	10	4	5	GAL1-S	GAL1-S	1205	1147	2005	1945	305	-800	-2.616	0
3104	10	5	5	GAL2	GAL2	1133	1174	2064	2028	195	-931	-4.379	0
3104	10	6	5	GAL2	GAL2	1355	1384	2130	2113	114	-775	-6.395	0
3104	10	7	5	GAL3	GAL3	234	511	2226	2210	141	-1992	-12.05	0
3104	10	8	5	GAL3	GAL3	167	569	2407	2396	143	-2240	-12.776	0
3104	10	9	5	GAL3C-S	GAL3C-S	2263	2135	2469	2398	299	-206	-0.88	0
3104	10	10	5	GAL3C-S	GAL3C-S	2588	2576	2633	2631	93	-45	-0.591	0
3104	10	11	5	GAL7-S	GAL7-S	2245	2166	2549	2498	212	-304	-1.566	0
3104	10	12	5	GAL7-S	GAL7-S	2411	2313	2838	2838	90	-427	-5.833	0
3104	10	1	6	GAL9	GAL9	353	668	1842	1847	394	-1489	-2.992	0
3104	10	2	6	GAL9	GAL9	464	788	1920	1922	81	-1456	-14	0
3104	10	3	6	GNA	GNA	33093	34592	1956	1951	117	31137	278.983	0
3104	10	4	6	GNA	GNA	32002	30030	1995	1987	152	30007	184.493	0
3104	10	5	6	GRFT	GRFT	6780	9356	2013	1972	218	4767	33.872	0
3104	10	6	6	GRFT	GRFT	7432	10353	2070	2063	151	5362	54.901	0
3104	10	7	6	GS-I;?GSL-I	GS-I;?GSL-I	1798	1773	2199	2188	180	-401	-2.306	0
3104	10	8	6	GS-I;?GSL-I	GS-I;?GSL-I	2309	2272	2371	2355	118	-62	-0.703	0
3104	10	9	6	GS-II; GSL-II	GS-II; GSL-II	1486	1503	2444	2375	275	-958	-3.171	0
3104	10	10	6	GS-II; GSL-II	GS-II; GSL-II	1680	1751	2623	2629	104	-943	-8.442	0
3104	10	11	6	HHA; HHL	HHA; HHL	22965	19321	2648	2591	185	20317	90.432	0
3104	10	12	6	HHA; HHL	HHA; HHL	21055	17957	2815	2819	136	18240	111.309	0
3104	10	1	7	Jacalin	Jacalin	1473	1490	1789	1789	151	-316	-1.98	0
3104	10	2	7	Jacalin	Jacalin	1520	1557	1888	1914	166	-368	-2.151	0
3104	10	3	7	LBA	LBA	1605	1634	1918	1926	147	-313	-1.986	0
3104	10	4	7	LBA	LBA	1312	1329	1943	1922	136	-631	-4.36	0
3104	10	5	7	LcH A	LcH A	1627	1640	1979	1950	220	-352	-1.409	0
3104	10	6	7	LcH A	LcH A	1688	1758	1944	1937	138	-256	-1.297	0
3104	10	7	7	LEA	LEA	1760	1772	2093	2081	165	-333	-1.873	0
3104	10	8	7	LEA	LEA	1955	1930	2352	2343	118	-397	-3.5	0
3104	10	9	7	LENTIL	LENTIL	2084	2163	2431	2349	300	-347	-0.62	0
3104	10	10	7	LENTIL	LENTIL	2800	2895	2620	2620	80	180	3.438	0
3104	10	11	7	Lotus	Lotus	1831	1805	2648	2597	177	-817	-4.475	0
3104	10	12	7	Lotus	Lotus	2007	2043	2804	2801	111	-797	-6.829	0
3104	10	1	8	LSL-N	LSL-N	2376	2297	1862	1910	785	514	0.493	0
3104	10	2	8	LSL-N	LSL-N	2230	2291	1971	1986	171	259	1.784	0
3104	10	3	8	MAA; MAL	MAA; MAL	6995	6276	1977	1982	134	5018	32.045	0
3104	10	4	8	MAA; MAL	MAA; MAL	7353	6510	2045	2026	135	5308	33.215	0
3104	10	5	8	MALECTIN	MALECTIN	1853	1788	2026	1997	228	-173	-0.917	0
3104	10	6	8	MALECTIN	MALECTIN	1639	1612	1824	1806	130	-185	-1.492	0
3104	10	7	8	MOA	MOA	715	785	1991	1994	328	-1276	-3.686	0
3104	10	8	8	MOA	MOA	764	961	2214	2210	134	-1450	-9.321	0
3104	10	9	8	MPL; MPA	MPL; MPA	2595	2466	2341	2267	301	254	0.661	0
3104	10	10	8	MPL; MPA	MPL; MPA	3011	2883	2542	2555	117	469	2.803	0
3104	10	11	8	NPA	NPA	11812	10211	2581	2534	184	9231	41.723	0
3104	10	12	8	NPA	NPA	12070	10327	2710	2715	96	9360	79.292	0
3104	10	1	9	ORYSATA	ORYSATA	1821	1649	1906	1909	162	-85	-1.605	0
3104	10	2	9	ORYSATA	ORYSATA	1704	1574	1997	2014	129	-293	-3.411	0
3104	10	3	9	PA-IIL	PA-IIL	1381	1444	2025	2038	166	-644	-3.578	0
3104	10	4	9	PA-IIL	PA-IIL	1290	1465	2134	2134	208	-844	-3.216	0
3104	10	5	9	PA-IL	PA-IL	1319	1253	2070	2043	221	-751	-3.575	0
3104	10	6	9	PA-IL	PA-IL	1487	1453	1980	1963	135	-493	-3.778	0
3104	10	7	9	PALa	PALa	1510	3641	2200	2199	154	-690	9.364	0
3104	10	8	9	PALa	PALa	1458	3126	2181	2173	196	-723	4.862	0
3104	10	9	9	PHA-E	PHA-E	4063	3972	2283	2216	274	1780	6.409	0
3104	10	10	9	PHA-E	PHA-E	4104	4054	2452	2452	81	1652	19.778	0
3104	10	11	9	PHA-L	PHA-L	1510	1581	2485	2429	192	-975	-4.417	0
3104	10	12	9	PHA-L	PHA-L	1818	1877	2579	2582	105	-761	-6.714	0
3104	10	1	10	PHA-P	PHA-P	1822	1848	1988	1999	169	-166	-0.893	0
3104	10	2	10	PHA-P	PHA-P	1902	1847	1999	1990	177	-97	-0.808	0
3104	10	3	10	PNA	PNA	1434	1481	2101	2129	162	-667	-4	0
3104	10	4	10	PNA	PNA	1302	1372	2214	2209	208	-912	-4.024	0
3104	10	5	10	PPL	PPL	1740	1753	2196	2170	254	-456	-1.642	0
3104	10	6	10	PPL	PPL	1698	1781	2152	2165	219	-454	-1.753	0
3104	10	7	10	PSA/PEA	PSA/PEA	2098	2173	2288	2284	183	-190	-0.607	0
3104	10	8	10	PSA/PEA	PSA/PEA	2663	2664	2333	2321	174	330	1.971	0
3104	10	9	10	PSL1A	PSL1A	1671	2452	2423	2339	289	-752	0.391	0
3104	10	10	10	PSL1A	PSL1A	2624	3564	2566	2568	99	58	10.061	0
3104	10	11	10	PTL	PTL	2711	2692	2582	2538	172	129	0.895	0
3104	10	12	10	PTL	PTL	2746	2720	2734	2733	99	12	-0.131	0
3104	10	1	11	RS-FUC	RS-FUC	1614	1370	2072	2102	221	-458	-3.312	0
3104	10	2	11	RS-FUC	RS-FUC	1224	1275	2065	2073	118	-841	-6.763	0
3104	10	3	11	SAMB	SAMB	22849	21762	2172	2207	236	20677	82.86	0
3104	10	4	11	SAMB	SAMB	23535	22201	2342	2371	257	21193	77.16	0
3104	10	5	11	SBA	SBA	1459	1451	2290	2300	312	-831	-2.721	0
3104	10	6	11	SBA	SBA	1103	1258	2262	2275	174	-1159	-5.845	0
3104	10	7	11	SJA	SJA	1450	1375	2368	2349	272	-918	-3.581	0
3104	10	8	11	SJA	SJA	1588	1572	2431	2444	178	-843	-4.899	0
3104	10	9	11	SNA-I	SNA-I	5927	5583	2496	2430	335	3431	9.412	0
3104	10	10	11	SNA-I	SNA-I	7793	7426	2609	2609	104	5184	46.317	0
3104	10	11	11	SNA-II	SNA-II	2125	2143	2657	2618	179	-532	-2.654	0
3104	10	12	11	SNA-II	SNA-II	2416	2371	2816	2821	117	-400	-3.846	0
3104	10	1	12	STL	STL	4436	4510	2188	2216	220	2248	10.427	0
3104	10	2	12	STL	STL	4245	3983	2197	2213	185	2048	9.568	0
3104	10	3	12	UDA	UDA	1795	1768	2163	2192	225	-368	-1.884	0
3104	10	4	12	UDA	UDA	1774	1716	2270	2271	210	-496	-2.643	0
3104	10	5	12	UEA I	UEA I	2555	2515	2279	2290	311	276	0.723	0
3104	10	6	12	UEA I	UEA I	2461	2449	2302	2324	245	159	0.51	0
3104	10	7	12	UEA-II	UEA-II	2392	2344	2423	2428	210	-31	-0.4	0
3104	10	8	12	UEA-II	UEA-II	2479	2454	2476	2482	158	3	-0.177	0
3104	10	9	12	VFA	VFA	2195	2161	2518	2445	297	-323	-0.956	0
3104	10	10	12	VFA	VFA	2414	2375	2610	2620	131	-196	-1.87	0
3104	10	11	12	VVA	VVA	7787	7710	2691	2647	188	5096	26.931	0
3104	10	12	12	VVA	VVA	7197	6786	2869	2868	95	4328	41.242	0
3104	10	1	13	WFA	WFA	923	1181	2205	2241	231	-1282	-4.589	0
3104	10	2	13	WFA	WFA	995	1222	2238	2275	226	-1243	-4.659	0
3104	10	3	13	WGA	WGA	2368	2303	2163	2199	194	205	0.536	0
3104	10	4	13	WGA	WGA	2287	2183	2269	2295	245	18	-0.457	0
3104	10	5	13	NEG	NEG	240	718	2308	2307	340	-2068	-4.674	0
3104	10	6	13	NEG	NEG	296	686	2221	2230	186	-1925	-8.301	0
3104	10	7	13	NEG	NEG	286	502	2320	2306	139	-2034	-12.978	0
3104	10	8	13	NEG	NEG	397	523	2391	2358	164	-1994	-11.189	0
3104	10	9	13	POS2	POS2	7148	7214	2475	2403	264	4673	18.223	0
3104	10	10	13	POS2	POS2	9064	8587	2628	2628	82	6436	72.671	0
3104	10	11	13	POS1	POS1	25508	22803	2717	2682	208	22791	96.736	0
3104	10	12	13	POS1	POS1	26015	23082	2903	2904	89	23112	226.719	0
2610	11	1	1	POS1	POS1	19283	15331	917	918	45	18366	320.289	0
2610	11	2	1	POS1	POS1	21415	17037	902	872	111	20513	145.631	0
2610	11	3	1	POS2	POS2	2756	3324	935	933	56	1821	42.696	0
2610	11	4	1	POS2	POS2	2790	3862	942	935	60	1848	48.783	0
2610	11	5	1	NEG	NEG	159	470	914	911	54	-755	-8.167	0
2610	11	6	1	NEG	NEG	187	575	876	869	96	-689	-3.062	0
2610	11	7	1	NEG	NEG	124	582	938	946	303	-814	-1.201	0
2610	11	8	1	NEG	NEG	309	573	956	955	54	-647	-7.074	0
2610	11	9	1	AAA	AAA	569	619	974	969	61	-405	-5.738	0
2610	11	10	1	AAA	AAA	704	730	1002	1002	85	-298	-3.2	0
2610	11	11	1	AAL	AAL	953	992	1002	990	85	-49	0.024	0
2610	11	12	1	AAL	AAL	1013	1023	1001	995	67	12	0.418	0
2610	11	1	2	ACG	ACG	951	950	921	921	39	30	0.744	0
2610	11	2	2	ACG	ACG	914	917	892	866	112	22	0.455	0
2610	11	3	2	ACL	ACL	245	350	931	932	47	-686	-12.383	0
2610	11	4	2	ACL	ACL	330	382	925	917	58	-595	-9.224	0
2610	11	5	2	ASA	ASA	8754	7326	926	920	58	7828	110.448	0
2610	11	6	2	ASA	ASA	9228	8075	884	879	70	8344	102.8	0
2610	11	7	2	BANLEC	BANLEC	3464	3469	905	911	51	2559	50.157	0
2610	11	8	2	BANLEC	BANLEC	4769	4616	958	955	51	3811	71.784	0
2610	11	9	2	BC2L-A	BC2L-A	1663	1575	959	955	56	704	11.071	0
2610	11	10	2	BC2L-A	BC2L-A	1569	1463	984	977	62	585	7.839	0
2610	11	11	2	BC2LCN	BC2LCN	895	868	964	947	81	-69	-0.975	0
2610	11	12	2	BC2LCN	BC2LCN	845	838	981	968	72	-136	-1.806	0
2610	11	1	3	BPA; BPL	BPA; BPL	562	580	917	918	44	-355	-7.682	0
2610	11	2	3	BPA; BPL	BPA; BPL	610	627	894	861	118	-284	-1.983	0
2610	11	3	3	CALSEPA	CALSEPA	2273	6544	917	921	63	1356	89.254	0
2610	11	4	3	CALSEPA	CALSEPA	3306	6954	897	886	68	2409	89.235	0
2610	11	5	3	CGL2	CGL2	915	1385	921	914	58	-6	8.121	0
2610	11	6	3	CGL2	CGL2	973	1626	895	887	73	78	10.123	0
2610	11	7	3	CNL	CNL	885	740	901	894	70	-16	-2.2	0
2610	11	8	3	CNL	CNL	906	771	953	951	46	-47	-3.913	0
2610	11	9	3	Con A	Con A	895	896	971	966	53	-76	-1.321	0
2610	11	10	3	Con A	Con A	975	960	977	964	83	-2	-0.048	0
2610	11	11	3	DBA	DBA	941	961	974	961	86	-33	0	0
2610	11	12	3	DBA	DBA	968	1008	967	945	100	1	0.63	0
2610	11	1	4	DISCOIDIN I	DISCOIDIN I	349	394	891	892	43	-542	-11.581	0
2610	11	2	4	DISCOIDIN I	DISCOIDIN I	268	336	871	838	116	-603	-4.328	0
2610	11	3	4	DISCOIDIN II	DISCOIDIN II	351	474	910	908	40	-559	-10.85	0
2610	11	4	4	DISCOIDIN II	DISCOIDIN II	332	416	891	882	59	-559	-7.898	0
2610	11	5	4	DSA	DSA	4000	3616	898	892	54	3102	50.444	0
2610	11	6	4	DSA	DSA	3806	3718	885	876	66	2921	43.061	0
2610	11	7	4	ECA	ECA	546	560	892	893	42	-346	-7.929	0
2610	11	8	4	ECA	ECA	498	697	939	936	50	-441	-4.78	0
2610	11	9	4	EEL	EEL	381	490	974	971	50	-593	-9.62	0
2610	11	10	4	EEL	EEL	435	504	972	959	84	-537	-5.417	0
2610	11	11	4	F17AG	F17AG	665	683	968	954	76	-303	-3.566	0
2610	11	12	4	F17AG	F17AG	690	713	981	968	74	-291	-3.446	0
2610	11	1	5	GAL1	GAL1	114	386	881	881	40	-767	-12.375	0
2610	11	2	5	GAL1	GAL1	251	461	875	843	114	-624	-3.351	0
2610	11	3	5	GAL1-S	GAL1-S	503	525	906	888	124	-403	-2.927	0
2610	11	4	5	GAL1-S	GAL1-S	631	528	895	866	137	-264	-2.467	0
2610	11	5	5	GAL2	GAL2	447	447	886	872	74	-439	-5.743	0
2610	11	6	5	GAL2	GAL2	543	551	881	867	72	-338	-4.389	0
2610	11	7	5	GAL3	GAL3	117	346	895	892	120	-778	-4.55	0
2610	11	8	5	GAL3	GAL3	117	355	945	932	97	-828	-5.948	0
2610	11	9	5	GAL3C-S	GAL3C-S	1064	1100	962	956	61	102	2.361	0
2610	11	10	5	GAL3C-S	GAL3C-S	975	967	972	964	62	3	0.048	0
2610	11	11	5	GAL7-S	GAL7-S	894	840	963	944	84	-69	-1.238	0
2610	11	12	5	GAL7-S	GAL7-S	956	914	998	985	404	-42	-0.176	0
2610	11	1	6	GAL9	GAL9	111	334	884	883	43	-773	-12.767	0
2610	11	2	6	GAL9	GAL9	146	309	853	822	113	-707	-4.54	0
2610	11	3	6	GNA	GNA	19145	18600	891	891	45	18254	393.533	0
2610	11	4	6	GNA	GNA	20943	21595	890	885	52	20053	398.269	0
2610	11	5	6	GRFT	GRFT	3617	5480	797	787	79	2820	59.405	0
2610	11	6	6	GRFT	GRFT	4025	5991	818	796	92	3207	56.467	0
2610	11	7	6	GS-I;?GSL-I	GS-I;?GSL-I	800	783	880	883	141	-80	-0.709	0
2610	11	8	6	GS-I;?GSL-I	GS-I;?GSL-I	768	772	934	933	56	-166	-2.875	0
2610	11	9	6	GS-II; GSL-II	GS-II; GSL-II	851	863	941	934	62	-90	-1.145	0
2610	11	10	6	GS-II; GSL-II	GS-II; GSL-II	810	805	968	964	56	-158	-2.839	0
2610	11	11	6	HHA; HHL	HHA; HHL	15226	13092	979	964	77	14247	157.506	0
2610	11	12	6	HHA; HHL	HHA; HHL	14763	12698	1013	1002	82	13750	142.634	0
2610	11	1	7	Jacalin	Jacalin	587	619	850	850	42	-263	-5.5	0
2610	11	2	7	Jacalin	Jacalin	577	626	831	800	117	-254	-1.487	0
2610	11	3	7	LBA	LBA	489	502	861	860	47	-372	-7.617	0
2610	11	4	7	LBA	LBA	539	553	809	805	55	-270	-4.582	0
2610	11	5	7	LcH A	LcH A	555	584	708	722	431	-153	-0.32	0
2610	11	6	7	LcH A	LcH A	654	692	672	646	98	-18	0.469	0
2610	11	7	7	LEA	LEA	461	492	817	822	62	-356	-5.323	0
2610	11	8	7	LEA	LEA	691	693	905	909	63	-214	-3.429	0
2610	11	9	7	LENTIL	LENTIL	797	834	948	944	52	-151	-2.115	0
2610	11	10	7	LENTIL	LENTIL	883	894	963	954	112	-80	-0.536	0
2610	11	11	7	Lotus	Lotus	646	643	952	929	97	-306	-2.948	0
2610	11	12	7	Lotus	Lotus	646	638	956	932	109	-310	-2.697	0
2610	11	1	8	LSL-N	LSL-N	1352	1306	884	883	41	468	10.317	0
2610	11	2	8	LSL-N	LSL-N	1298	1244	876	841	120	422	3.358	0
2610	11	3	8	MAA; MAL	MAA; MAL	4032	3562	888	888	50	3144	53.48	0
2610	11	4	8	MAA; MAL	MAA; MAL	4021	3462	819	813	56	3202	47.304	0
2610	11	5	8	MALECTIN	MALECTIN	607	607	686	676	85	-79	-0.812	0
2610	11	6	8	MALECTIN	MALECTIN	356	369	571	560	103	-215	-1.854	0
2610	11	7	8	MOA	MOA	342	397	788	790	100	-446	-3.93	0
2610	11	8	8	MOA	MOA	425	495	887	889	45	-462	-8.756	0
2610	11	9	8	MPL; MPA	MPL; MPA	1152	1171	943	938	52	209	4.481	0
2610	11	10	8	MPL; MPA	MPL; MPA	1168	1166	958	948	64	210	3.406	0
2610	11	11	8	NPA	NPA	9105	7944	981	967	79	8124	88.316	0
2610	11	12	8	NPA	NPA	8427	7598	996	967	108	7431	61.398	0
2610	11	1	9	ORYSATA	ORYSATA	899	1307	913	913	71	-14	5.549	0
2610	11	2	9	ORYSATA	ORYSATA	762	976	884	854	125	-122	0.976	0
2610	11	3	9	PA-IIL	PA-IIL	456	635	908	907	45	-452	-6.044	0
2610	11	4	9	PA-IIL	PA-IIL	637	635	828	825	68	-191	-2.794	0
2610	11	5	9	PA-IL	PA-IL	402	387	805	801	61	-403	-6.787	0
2610	11	6	9	PA-IL	PA-IL	406	436	759	748	92	-353	-3.391	0
2610	11	7	9	PALa	PALa	813	1178	829	827	49	-16	7.163	0
2610	11	8	9	PALa	PALa	791	1001	870	871	43	-79	3.023	0
2610	11	9	9	PHA-E	PHA-E	2553	2456	911	908	51	1642	30.353	0
2610	11	10	9	PHA-E	PHA-E	2864	2726	937	930	59	1927	30.441	0
2610	11	11	9	PHA-L	PHA-L	906	907	949	935	79	-43	-0.354	0
2610	11	12	9	PHA-L	PHA-L	956	1014	960	950	73	-4	0.877	0
2610	11	1	10	PHA-P	PHA-P	744	762	930	932	47	-186	-3.617	0
2610	11	2	10	PHA-P	PHA-P	889	856	903	861	139	-14	-0.036	0
2610	11	3	10	PNA	PNA	458	518	933	934	57	-475	-7.298	0
2610	11	4	10	PNA	PNA	452	500	904	900	63	-452	-6.349	0
2610	11	5	10	PPL	PPL	701	691	876	869	61	-175	-2.918	0
2610	11	6	10	PPL	PPL	671	670	866	859	70	-195	-2.7	0
2610	11	7	10	PSA/PEA	PSA/PEA	776	782	912	914	54	-136	-2.444	0
2610	11	8	10	PSA/PEA	PSA/PEA	1073	1065	935	954	647	138	0.172	0
2610	11	9	10	PSL1A	PSL1A	959	1715	957	951	52	2	14.692	0
2610	11	10	10	PSL1A	PSL1A	1120	2656	979	972	57	141	29.544	0
2610	11	11	10	PTL	PTL	1052	1031	975	962	73	77	0.945	0
2610	11	12	10	PTL	PTL	1078	1061	1006	993	79	72	0.861	0
2610	11	1	11	RS-FUC	RS-FUC	694	596	944	943	42	-250	-8.262	0
2610	11	2	11	RS-FUC	RS-FUC	720	654	925	895	117	-205	-2.06	0
2610	11	3	11	SAMB	SAMB	11782	11301	943	960	209	10839	49.478	0
2610	11	4	11	SAMB	SAMB	13926	13388	919	912	65	13007	191.938	0
2610	11	5	11	SBA	SBA	409	470	905	905	65	-496	-6.692	0
2610	11	6	11	SBA	SBA	497	556	928	914	78	-431	-4.59	0
2610	11	7	11	SJA	SJA	594	635	963	962	82	-369	-3.988	0
2610	11	8	11	SJA	SJA	709	702	941	937	62	-232	-3.79	0
2610	11	9	11	SNA-I	SNA-I	2097	4717	973	966	55	1124	68.2	0
2610	11	10	11	SNA-I	SNA-I	3659	3465	987	974	67	2672	37.179	0
2610	11	11	11	SNA-II	SNA-II	918	909	991	976	76	-73	-0.882	0
2610	11	12	11	SNA-II	SNA-II	922	908	1006	995	67	-84	-1.299	0
2610	11	1	12	STL	STL	1905	1835	921	903	102	984	9.137	0
2610	11	2	12	STL	STL	1908	1746	904	872	151	1004	5.788	0
2610	11	3	12	UDA	UDA	726	706	953	950	63	-227	-3.873	0
2610	11	4	12	UDA	UDA	662	668	921	912	65	-259	-3.754	0
2610	11	5	12	UEA I	UEA I	1174	1145	914	911	60	260	3.9	0
2610	11	6	12	UEA I	UEA I	1545	1484	929	912	88	616	6.5	0
2610	11	7	12	UEA-II	UEA-II	800	828	979	977	46	-179	-3.239	0
2610	11	8	12	UEA-II	UEA-II	789	6692	947	1322	3794	-158	1.415	-100
2610	11	9	12	VFA	VFA	788	788	943	937	65	-155	-2.292	0
2610	11	10	12	VFA	VFA	805	791	977	966	69	-172	-2.536	0
2610	11	11	12	VVA	VVA	7955	7153	1004	990	74	6951	83.284	0
2610	11	12	12	VVA	VVA	7826	7048	997	987	155	6829	39.103	0
2610	11	1	13	WFA	WFA	421	542	946	942	73	-525	-5.479	0
2610	11	2	13	WFA	WFA	332	406	809	747	180	-477	-1.894	0
2610	11	3	13	WGA	WGA	876	867	946	947	52	-70	-1.538	0
2610	11	4	13	WGA	WGA	1060	1031	947	941	82	113	1.098	0
2610	11	5	13	NEG	NEG	76	241	937	932	58	-861	-11.914	0
2610	11	6	13	NEG	NEG	85	361	952	938	74	-867	-7.797	0
2610	11	7	13	NEG	NEG	119	231	970	936	177	-851	-3.983	0
2610	11	8	13	NEG	NEG	148	257	989	989	64	-841	-11.437	0
2610	11	9	13	POS2	POS2	6711	7359	989	983	55	5722	115.927	0
2610	11	10	13	POS2	POS2	8281	7899	996	989	57	7285	121.228	0
2610	11	11	13	POS1	POS1	24399	21399	992	978	73	23407	279.74	0
2610	11	12	13	POS1	POS1	26477	22789	1014	1003	67	25463	325.164	0
3105	12	1	1	POS1	POS1	19355	15732	1815	1801	138	17540	100.949	0
3105	12	2	1	POS1	POS1	22096	17353	1862	1868	135	20234	114.704	0
3105	12	3	1	POS2	POS2	2693	3465	1803	1797	122	890	13.672	0
3105	12	4	1	POS2	POS2	2849	4204	1905	1877	162	944	14.364	0
3105	12	5	1	NEG	NEG	205	959	1902	1872	184	-1697	-4.962	0
3105	12	6	1	NEG	NEG	333	1111	1827	1833	404	-1494	-1.787	0
3105	12	7	1	NEG	NEG	492	1221	1940	1940	160	-1448	-4.494	0
3105	12	8	1	NEG	NEG	801	1290	2020	1998	144	-1219	-4.917	0
3105	12	9	1	AAA	AAA	1308	1377	2075	2026	211	-767	-3.076	0
3105	12	10	1	AAA	AAA	1481	1607	2240	2241	83	-759	-7.639	0
3105	12	11	1	AAL	AAL	1813	1864	2292	2262	132	-479	-3.015	0
3105	12	12	1	AAL	AAL	1993	2040	2410	2417	119	-417	-3.168	0
3105	12	1	2	ACG	ACG	2190	2117	1753	1737	111	437	3.423	0
3105	12	2	2	ACG	ACG	2155	2091	1828	1824	89	327	3	0
3105	12	3	2	ACL	ACL	1010	1066	1790	1779	133	-780	-5.361	0
3105	12	4	2	ACL	ACL	958	1017	1815	1788	146	-857	-5.281	0
3105	12	5	2	ASA	ASA	10078	8905	1829	1796	181	8249	39.276	0
3105	12	6	2	ASA	ASA	11208	10728	1759	1753	117	9449	76.709	0
3105	12	7	2	BANLEC	BANLEC	6834	6769	1821	1825	140	5013	35.314	0
3105	12	8	2	BANLEC	BANLEC	9250	8781	1983	1958	151	7267	45.185	0
3105	12	9	2	BC2L-A	BC2L-A	2559	2374	2051	2002	262	508	1.42	0
3105	12	10	2	BC2L-A	BC2L-A	2762	2721	2228	2242	127	534	3.772	0
3105	12	11	2	BC2LCN	BC2LCN	2104	2049	2283	2258	166	-179	-1.259	0
3105	12	12	2	BC2LCN	BC2LCN	1959	2011	2392	2397	98	-433	-3.939	0
3105	12	1	3	BPA; BPL	BPA; BPL	1236	1239	1752	1745	160	-516	-3.162	0
3105	12	2	3	BPA; BPL	BPA; BPL	1732	1735	1812	1802	102	-80	-0.657	0
3105	12	3	3	CALSEPA	CALSEPA	5704	14078	1808	1811	254	3896	48.295	0
3105	12	4	3	CALSEPA	CALSEPA	7766	15312	1875	1868	249	5891	53.992	0
3105	12	5	3	CGL2	CGL2	1875	2621	1876	1842	181	-1	4.304	0
3105	12	6	3	CGL2	CGL2	1783	2526	1845	1838	113	-62	6.088	0
3105	12	7	3	CNL	CNL	1362	1208	1793	1783	120	-431	-4.792	0
3105	12	8	3	CNL	CNL	1485	1489	1993	1974	143	-508	-3.392	0
3105	12	9	3	Con A	Con A	1658	1666	2025	1954	256	-367	-1.125	0
3105	12	10	3	Con A	Con A	1282	1411	2200	2202	75	-918	-10.547	0
3105	12	11	3	DBA	DBA	1467	1620	2245	2219	138	-778	-4.341	0
3105	12	12	3	DBA	DBA	1366	1651	2399	2402	90	-1033	-8.344	0
3105	12	1	4	DISCOIDIN I	DISCOIDIN I	419	718	1741	1729	106	-1322	-9.538	0
3105	12	2	4	DISCOIDIN I	DISCOIDIN I	366	526	1773	1767	92	-1407	-13.489	0
3105	12	3	4	DISCOIDIN II	DISCOIDIN II	981	1115	1788	1794	180	-807	-3.772	0
3105	12	4	4	DISCOIDIN II	DISCOIDIN II	978	1055	1814	1800	121	-836	-6.157	0
3105	12	5	4	DSA	DSA	6301	5857	1812	1790	169	4489	24.065	0
3105	12	6	4	DSA	DSA	6382	5782	1841	1835	109	4541	36.211	0
3105	12	7	4	ECA	ECA	863	988	1851	1855	77	-988	-11.26	0
3105	12	8	4	ECA	ECA	867	1320	1944	1917	193	-1077	-3.093	0
3105	12	9	4	EEL	EEL	1300	1362	2013	1964	245	-713	-2.457	0
3105	12	10	4	EEL	EEL	1346	1480	2222	2228	95	-876	-7.874	0
3105	12	11	4	F17AG	F17AG	1548	1597	2218	2190	135	-670	-4.393	0
3105	12	12	4	F17AG	F17AG	1587	1633	2381	2385	106	-794	-7.094	0
3105	12	1	5	GAL1	GAL1	287	643	1716	1704	133	-1429	-7.977	0
3105	12	2	5	GAL1	GAL1	261	557	1768	1769	85	-1507	-14.259	0
3105	12	3	5	GAL1-S	GAL1-S	390	580	1752	1748	97	-1362	-12.041	0
3105	12	4	5	GAL1-S	GAL1-S	305	506	1812	1801	151	-1507	-8.576	0
3105	12	5	5	GAL2	GAL2	1002	1013	1824	1795	183	-822	-4.273	0
3105	12	6	5	GAL2	GAL2	1185	1176	1839	1839	114	-654	-5.816	0
3105	12	7	5	GAL3	GAL3	365	726	1882	1869	233	-1517	-4.906	0
3105	12	8	5	GAL3	GAL3	452	810	1980	1945	247	-1528	-4.595	0
3105	12	9	5	GAL3C-S	GAL3C-S	1938	1858	2007	1971	219	-69	-0.516	0
3105	12	10	5	GAL3C-S	GAL3C-S	2225	2214	2179	2184	109	46	0.275	0
3105	12	11	5	GAL7-S	GAL7-S	2060	1943	2229	2217	161	-169	-1.702	0
3105	12	12	5	GAL7-S	GAL7-S	1961	1800	2336	2307	193	-375	-2.627	0
3105	12	1	6	GAL9	GAL9	331	511	1672	1677	296	-1341	-3.939	0
3105	12	2	6	GAL9	GAL9	569	897	1752	1764	133	-1183	-6.519	0
3105	12	3	6	GNA	GNA	31525	31378	1734	1738	108	29791	274.444	0
3105	12	4	6	GNA	GNA	26995	27010	1692	1670	158	25303	160.38	0
3105	12	5	6	GRFT	GRFT	6281	8666	1721	1630	316	4560	22.266	0
3105	12	6	6	GRFT	GRFT	6821	9078	1756	1762	165	5065	44.339	0
3105	12	7	6	GS-I;?GSL-I	GS-I;?GSL-I	1710	1671	1836	1842	169	-126	-1.012	0
3105	12	8	6	GS-I;?GSL-I	GS-I;?GSL-I	2026	1961	1929	1912	172	97	0.285	0
3105	12	9	6	GS-II; GSL-II	GS-II; GSL-II	1255	1286	2002	1963	204	-747	-3.319	0
3105	12	10	6	GS-II; GSL-II	GS-II; GSL-II	666	946	2158	2169	139	-1492	-8.799	0
3105	12	11	6	HHA; HHL	HHA; HHL	16802	13716	2176	2150	197	14626	58.711	0
3105	12	12	6	HHA; HHL	HHA; HHL	18528	15349	2310	2277	204	16218	64.078	0
3105	12	1	7	Jacalin	Jacalin	1174	1201	1646	1642	136	-472	-3.243	0
3105	12	2	7	Jacalin	Jacalin	1189	1270	1695	1685	97	-506	-4.278	0
3105	12	3	7	LBA	LBA	1071	1098	1681	1687	133	-610	-4.429	0
3105	12	4	7	LBA	LBA	1281	1276	1717	1700	133	-436	-3.188	0
3105	12	5	7	LcH A	LcH A	1341	1376	1683	1659	231	-342	-1.225	0
3105	12	6	7	LcH A	LcH A	1443	1508	1583	1557	156	-140	-0.314	0
3105	12	7	7	LEA	LEA	1543	1563	1789	1800	197	-246	-1.203	0
3105	12	8	7	LEA	LEA	1800	1794	1921	1914	166	-121	-0.723	0
3105	12	9	7	LENTIL	LENTIL	2204	2184	1981	1936	212	223	1.17	0
3105	12	10	7	LENTIL	LENTIL	2051	2071	2075	2087	109	-24	-0.147	0
3105	12	11	7	Lotus	Lotus	1472	1434	2094	2081	167	-622	-3.874	0
3105	12	12	7	Lotus	Lotus	1568	1595	2296	2301	264	-728	-2.674	0
3105	12	1	8	LSL-N	LSL-N	2544	2416	1715	1716	164	829	4.268	0
3105	12	2	8	LSL-N	LSL-N	2458	2312	1753	1754	149	705	3.745	0
3105	12	3	8	MAA; MAL	MAA; MAL	7088	6137	1759	1753	89	5329	49.258	0
3105	12	4	8	MAA; MAL	MAA; MAL	7042	6110	1847	1861	211	5195	20.137	0
3105	12	5	8	MALECTIN	MALECTIN	1488	1448	1745	1743	288	-257	-1.024	0
3105	12	6	8	MALECTIN	MALECTIN	1300	1282	1301	1314	175	-1	-0.183	0
3105	12	7	8	MOA	MOA	560	650	1612	1497	323	-1052	-2.622	0
3105	12	8	8	MOA	MOA	729	891	1827	1819	157	-1098	-5.911	0
3105	12	9	8	MPL; MPA	MPL; MPA	2230	2119	1929	1892	224	301	1.013	0
3105	12	10	8	MPL; MPA	MPL; MPA	2240	2164	2008	2024	109	232	1.284	0
3105	12	11	8	NPA	NPA	10918	9419	2094	2082	132	8824	55.583	0
3105	12	12	8	NPA	NPA	11574	9828	2230	2243	211	9344	35.948	0
3105	12	1	9	ORYSATA	ORYSATA	1732	1591	1751	1756	155	-19	-1.065	0
3105	12	2	9	ORYSATA	ORYSATA	1788	1631	1809	1816	132	-21	-1.402	0
3105	12	3	9	PA-IIL	PA-IIL	836	1324	1813	1830	152	-977	-3.329	0
3105	12	4	9	PA-IIL	PA-IIL	1195	1431	1866	1860	171	-671	-2.509	0
3105	12	5	9	PA-IL	PA-IL	1049	1063	1696	1664	199	-647	-3.02	0
3105	12	6	9	PA-IL	PA-IL	1301	1218	1624	1606	155	-323	-2.503	0
3105	12	7	9	PALa	PALa	1293	3463	1814	1795	201	-521	8.299	0
3105	12	8	9	PALa	PALa	1390	1994	1802	1800	163	-412	1.19	0
3105	12	9	9	PHA-E	PHA-E	2916	2721	1860	1831	196	1056	4.541	0
3105	12	10	9	PHA-E	PHA-E	3720	3639	1980	1997	132	1740	12.439	0
3105	12	11	9	PHA-L	PHA-L	1274	1352	1996	1975	124	-722	-5.024	0
3105	12	12	9	PHA-L	PHA-L	1676	1703	2079	2070	113	-403	-3.248	0
3105	12	1	10	PHA-P	PHA-P	1628	1670	1765	1755	148	-137	-0.574	0
3105	12	2	10	PHA-P	PHA-P	1862	1869	1794	1788	144	68	0.563	0
3105	12	3	10	PNA	PNA	1358	1402	1961	1979	175	-603	-3.297	0
3105	12	4	10	PNA	PNA	1082	1129	1831	1836	214	-749	-3.304	0
3105	12	5	10	PPL	PPL	1283	1276	1709	1686	184	-426	-2.228	0
3105	12	6	10	PPL	PPL	1390	1441	1850	1863	191	-460	-2.209	0
3105	12	7	10	PSA/PEA	PSA/PEA	1707	1793	1951	1986	228	-244	-0.846	0
3105	12	8	10	PSA/PEA	PSA/PEA	1870	1952	1959	1945	205	-89	0.034	0
3105	12	9	10	PSL1A	PSL1A	1739	2056	2057	1986	303	-318	0.231	0
3105	12	10	10	PSL1A	PSL1A	2175	2396	2153	2154	122	22	1.984	0
3105	12	11	10	PTL	PTL	2299	2233	2063	2053	157	236	1.146	0
3105	12	12	10	PTL	PTL	2275	2250	2129	2130	102	146	1.176	0
3105	12	1	11	RS-FUC	RS-FUC	1228	1126	1825	1832	146	-597	-4.836	0
3105	12	2	11	RS-FUC	RS-FUC	1072	1121	1871	1880	121	-799	-6.273	0
3105	12	3	11	SAMB	SAMB	13922	13437	2024	2032	203	11898	56.182	0
3105	12	4	11	SAMB	SAMB	16214	15528	1941	1968	213	14273	63.662	0
3105	12	5	11	SBA	SBA	681	904	1890	1900	246	-1209	-4.049	0
3105	12	6	11	SBA	SBA	850	1029	1918	1898	249	-1068	-3.49	0
3105	12	7	11	SJA	SJA	1562	1533	2034	2040	230	-472	-2.204	0
3105	12	8	11	SJA	SJA	1665	1615	2054	2055	255	-389	-1.725	0
3105	12	9	11	SNA-I	SNA-I	5740	5368	2123	2081	251	3617	13.096	0
3105	12	10	11	SNA-I	SNA-I	7616	7174	2165	2178	120	5451	41.633	0
3105	12	11	11	SNA-II	SNA-II	1777	1784	2153	2139	146	-376	-2.432	0
3105	12	12	11	SNA-II	SNA-II	2107	2115	2268	2271	111	-161	-1.405	0
3105	12	1	12	STL	STL	4089	3862	1929	1946	234	2160	8.188	0
3105	12	2	12	STL	STL	4001	3732	2011	2035	204	1990	8.319	0
3105	12	3	12	UDA	UDA	1671	1640	1968	1979	233	-297	-1.455	0
3105	12	4	12	UDA	UDA	1608	1550	1998	2005	216	-390	-2.106	0
3105	12	5	12	UEA I	UEA I	1465	1463	1984	1991	231	-519	-2.286	0
3105	12	6	12	UEA I	UEA I	1689	1680	1931	1948	214	-242	-1.252	0
3105	12	7	12	UEA-II	UEA-II	1972	1974	2031	2048	180	-59	-0.411	0
3105	12	8	12	UEA-II	UEA-II	2050	2048	2101	2117	195	-51	-0.354	0
3105	12	9	12	VFA	VFA	1877	1866	2127	2106	292	-250	-0.822	0
3105	12	10	12	VFA	VFA	2129	2074	2175	2183	178	-46	-0.612	0
3105	12	11	12	VVA	VVA	8082	8272	2171	2145	139	5911	44.079	0
3105	12	12	12	VVA	VVA	7172	6757	2332	2314	221	4840	20.104	0
3105	12	1	13	WFA	WFA	813	962	2018	2012	306	-1205	-3.431	0
3105	12	2	13	WFA	WFA	804	992	2065	2091	186	-1261	-5.909	0
3105	12	3	13	WGA	WGA	2026	1967	2003	2040	188	23	-0.388	0
3105	12	4	13	WGA	WGA	1974	1862	1997	2014	201	-23	-0.756	0
3105	12	5	13	NEG	NEG	182	506	2010	2005	252	-1828	-5.948	0
3105	12	6	13	NEG	NEG	153	537	1979	1998	194	-1826	-7.531	0
3105	12	7	13	NEG	NEG	334	490	2043	2082	198	-1709	-8.04	0
3105	12	8	13	NEG	NEG	402	608	2097	2109	221	-1695	-6.792	0
3105	12	9	13	POS2	POS2	7705	7696	2140	2098	219	5565	25.562	0
3105	12	10	13	POS2	POS2	9114	8381	2134	2153	196	6980	31.776	0
3105	12	11	13	POS1	POS1	24536	20940	2203	2183	138	22333	135.92	0
3105	12	12	13	POS1	POS1	27155	23472	2326	2328	118	24829	179.186	0
3106	14	1	1	POS1	POS1	19237	16721	2019	2004	145	17218	101.497	0
3106	14	2	1	POS1	POS1	22215	17977	1999	1996	93	20216	171.839	0
3106	14	3	1	POS2	POS2	2909	3740	2012	2002	91	897	19.099	0
3106	14	4	1	POS2	POS2	2771	4016	1983	1967	125	788	16.392	0
3106	14	5	1	NEG	NEG	128	1046	1959	1926	168	-1831	-5.238	0
3106	14	6	1	NEG	NEG	240	916	1928	1920	100	-1688	-10.04	0
3106	14	7	1	NEG	NEG	548	1036	1975	1973	88	-1427	-10.648	0
3106	14	8	1	NEG	NEG	542	1216	2054	2041	195	-1512	-4.231	0
3106	14	9	1	AAA	AAA	1604	1651	2129	2088	223	-525	-1.96	0
3106	14	10	1	AAA	AAA	1813	1910	2281	2294	146	-468	-2.63	0
3106	14	11	1	AAL	AAL	2204	2203	2349	2321	137	-145	-0.861	0
3106	14	12	1	AAL	AAL	2027	2065	2444	2445	79	-417	-4.81	0
3106	14	1	2	ACG	ACG	2330	2290	1948	1951	152	382	2.23	0
3106	14	2	2	ACG	ACG	2434	2355	1948	1964	337	486	1.16	0
3106	14	3	2	ACL	ACL	935	1068	1961	2040	721	-1026	-1.348	0
3106	14	4	2	ACL	ACL	1036	1082	1947	1931	108	-911	-7.861	0
3106	14	5	2	ASA	ASA	11608	11132	1937	1902	167	9671	55.269	0
3106	14	6	2	ASA	ASA	16051	13141	1913	1904	96	14138	117.052	0
3106	14	7	2	BANLEC	BANLEC	6706	6810	1968	1964	117	4738	41.419	0
3106	14	8	2	BANLEC	BANLEC	3881	3524	2100	2131	424	1781	3.285	0
3106	14	9	2	BC2L-A	BC2L-A	2302	2430	2140	2082	280	162	1.243	0
3106	14	10	2	BC2L-A	BC2L-A	2499	2627	2274	2287	127	225	2.677	0
3106	14	11	2	BC2LCN	BC2LCN	1708	1684	2300	2271	176	-592	-3.335	0
3106	14	12	2	BC2LCN	BC2LCN	1995	2001	2451	2452	122	-456	-3.697	0
3106	14	1	3	BPA; BPL	BPA; BPL	1255	1312	1874	1865	123	-619	-4.496	0
3106	14	2	3	BPA; BPL	BPA; BPL	1463	1515	1899	1891	95	-436	-3.958	0
3106	14	3	3	CALSEPA	CALSEPA	5411	14320	1922	1945	598	3489	20.694	0
3106	14	4	3	CALSEPA	CALSEPA	7274	15556	1938	1944	467	5336	29.148	0
3106	14	5	3	CGL2	CGL2	2102	3045	1958	1927	171	144	6.538	0
3106	14	6	3	CGL2	CGL2	2115	2334	1932	1917	106	183	3.934	0
3106	14	7	3	CNL	CNL	1589	1465	1998	2003	135	-409	-3.985	0
3106	14	8	3	CNL	CNL	1371	1515	2091	2086	134	-720	-4.261	0
3106	14	9	3	Con A	Con A	1810	1787	2121	2072	225	-311	-1.267	0
3106	14	10	3	Con A	Con A	2003	2026	2271	2274	85	-268	-2.918	0
3106	14	11	3	DBA	DBA	1284	1523	2310	2287	131	-1026	-5.832	0
3106	14	12	3	DBA	DBA	1450	1664	2433	2437	105	-983	-7.362	0
3106	14	1	4	DISCOIDIN I	DISCOIDIN I	346	658	1850	1830	114	-1504	-10.281	0
3106	14	2	4	DISCOIDIN I	DISCOIDIN I	394	531	1893	1886	113	-1499	-11.991	0
3106	14	3	4	DISCOIDIN II	DISCOIDIN II	1055	1174	1933	1932	71	-878	-10.676	0
3106	14	4	4	DISCOIDIN II	DISCOIDIN II	963	1056	1925	1911	131	-962	-6.527	0
3106	14	5	4	DSA	DSA	4995	4729	1910	1891	193	3085	14.705	0
3106	14	6	4	DSA	DSA	4300	4199	1939	1936	93	2361	24.333	0
3106	14	7	4	ECA	ECA	890	994	1983	1987	118	-1093	-8.415	0
3106	14	8	4	ECA	ECA	1204	3203	2063	2024	177	-859	6.661	0
3106	14	9	4	EEL	EEL	1924	1888	2169	2125	245	-245	-0.967	0
3106	14	10	4	EEL	EEL	2165	2200	2273	2286	116	-108	-0.741	0
3106	14	11	4	F17AG	F17AG	1613	1644	2302	2282	134	-689	-4.761	0
3106	14	12	4	F17AG	F17AG	1595	1620	2372	2254	283	-777	-2.24	0
3106	14	1	5	GAL1	GAL1	191	531	1831	1815	105	-1640	-12.229	0
3106	14	2	5	GAL1	GAL1	261	557	1887	1894	104	-1626	-12.856	0
3106	14	3	5	GAL1-S	GAL1-S	340	573	1928	1926	108	-1588	-12.528	0
3106	14	4	5	GAL1-S	GAL1-S	262	417	1905	1883	164	-1643	-8.939	0
3106	14	5	5	GAL2	GAL2	441	549	1824	1687	324	-1383	-3.512	0
3106	14	6	5	GAL2	GAL2	1240	1259	1940	1936	131	-700	-5.168	0
3106	14	7	5	GAL3	GAL3	132	263	1985	1990	105	-1853	-16.448	0
3106	14	8	5	GAL3	GAL3	141	282	2076	2045	174	-1935	-10.132	0
3106	14	9	5	GAL3C-S	GAL3C-S	1941	1906	2125	2080	218	-184	-0.798	0
3106	14	10	5	GAL3C-S	GAL3C-S	2295	2337	2232	2252	148	63	0.574	0
3106	14	11	5	GAL7-S	GAL7-S	1941	1837	2268	2250	129	-327	-3.202	0
3106	14	12	5	GAL7-S	GAL7-S	1724	1592	2289	2146	319	-565	-1.737	0
3106	14	1	6	GAL9	GAL9	366	659	1790	1777	123	-1424	-9.089	0
3106	14	2	6	GAL9	GAL9	470	730	1860	1858	99	-1390	-11.394	0
3106	14	3	6	GNA	GNA	33075	34166	1878	1887	117	31197	275.889	0
3106	14	4	6	GNA	GNA	31978	31495	1899	1897	164	30079	180.476	0
3106	14	5	6	GRFT	GRFT	6026	8167	1732	1684	252	4294	25.726	0
3106	14	6	6	GRFT	GRFT	6833	9076	1859	1863	147	4974	49.068	0
3106	14	7	6	GS-I;?GSL-I	GS-I;?GSL-I	1830	1792	1908	1897	157	-78	-0.669	0
3106	14	8	6	GS-I;?GSL-I	GS-I;?GSL-I	2020	1979	2052	2017	171	-32	-0.222	0
3106	14	9	6	GS-II; GSL-II	GS-II; GSL-II	676	943	2114	2064	211	-1438	-5.313	0
3106	14	10	6	GS-II; GSL-II	GS-II; GSL-II	775	1032	2221	2236	103	-1446	-11.689	0
3106	14	11	6	HHA; HHL	HHA; HHL	21970	18674	2296	2295	132	19674	124.083	0
3106	14	12	6	HHA; HHL	HHA; HHL	22187	19187	2388	2382	139	19799	120.899	0
3106	14	1	7	Jacalin	Jacalin	1044	1139	1727	1721	162	-683	-3.593	0
3106	14	2	7	Jacalin	Jacalin	1153	1278	1804	1808	141	-651	-3.759	0
3106	14	3	7	LBA	LBA	949	965	1846	1856	147	-897	-6.061	0
3106	14	4	7	LBA	LBA	1287	1300	1803	1800	136	-516	-3.676	0
3106	14	5	7	LcH A	LcH A	1459	1459	1792	1776	189	-333	-1.677	0
3106	14	6	7	LcH A	LcH A	1446	1511	1681	1669	119	-235	-1.328	0
3106	14	7	7	LEA	LEA	1543	1556	1835	1836	160	-292	-1.75	0
3106	14	8	7	LEA	LEA	1821	1821	2036	2011	175	-215	-1.086	0
3106	14	9	7	LENTIL	LENTIL	1921	2001	2103	2064	213	-182	-0.296	0
3106	14	10	7	LENTIL	LENTIL	2152	2178	2249	2264	115	-97	-0.748	0
3106	14	11	7	Lotus	Lotus	1563	1544	2288	2277	151	-725	-4.854	0
3106	14	12	7	Lotus	Lotus	1599	1664	2362	2355	181	-763	-3.818	0
3106	14	1	8	LSL-N	LSL-N	2396	2308	1847	1839	161	549	2.913	0
3106	14	2	8	LSL-N	LSL-N	2410	2304	1859	1864	114	551	3.86	0
3106	14	3	8	MAA; MAL	MAA; MAL	6881	6084	1897	1902	147	4984	28.449	0
3106	14	4	8	MAA; MAL	MAA; MAL	7145	6310	1833	1832	154	5312	29.078	0
3106	14	5	8	MALECTIN	MALECTIN	1390	1359	1764	1744	227	-374	-1.696	0
3106	14	6	8	MALECTIN	MALECTIN	1262	1257	1533	1534	115	-271	-2.409	0
3106	14	7	8	MOA	MOA	678	841	1791	1794	115	-1113	-8.287	0
3106	14	8	8	MOA	MOA	741	994	1998	1979	213	-1257	-4.624	0
3106	14	9	8	MPL; MPA	MPL; MPA	2281	2256	2103	2065	248	178	0.77	0
3106	14	10	8	MPL; MPA	MPL; MPA	2898	2716	2189	2207	144	709	3.535	0
3106	14	11	8	NPA	NPA	13641	12606	2217	2219	152	11424	68.336	0
3106	14	12	8	NPA	NPA	11915	11172	2345	2364	512	9570	17.203	0
3106	14	1	9	ORYSATA	ORYSATA	1914	2803	1914	1924	174	0	5.052	0
3106	14	2	9	ORYSATA	ORYSATA	1675	1596	1913	1917	148	-238	-2.169	0
3106	14	3	9	PA-IIL	PA-IIL	905	1082	1912	1907	128	-1007	-6.445	0
3106	14	4	9	PA-IIL	PA-IIL	1112	1200	1854	1800	230	-742	-2.609	0
3106	14	5	9	PA-IL	PA-IL	1014	1035	1797	1787	193	-783	-3.896	0
3106	14	6	9	PA-IL	PA-IL	1255	1192	1759	1731	172	-504	-3.134	0
3106	14	7	9	PALa	PALa	1278	4636	1966	1997	176	-688	14.994	0
3106	14	8	9	PALa	PALa	1043	1714	1948	1937	215	-905	-1.037	0
3106	14	9	9	PHA-E	PHA-E	3516	3316	1952	1853	259	1564	5.649	0
3106	14	10	9	PHA-E	PHA-E	4891	4779	2119	2131	127	2772	20.85	0
3106	14	11	9	PHA-L	PHA-L	1520	1554	2149	2140	175	-629	-3.349	0
3106	14	12	9	PHA-L	PHA-L	2045	2065	2203	2172	150	-158	-0.713	0
3106	14	1	10	PHA-P	PHA-P	1667	1771	1918	1933	176	-251	-0.92	0
3106	14	2	10	PHA-P	PHA-P	1950	1910	1938	1928	146	12	-0.123	0
3106	14	3	10	PNA	PNA	1132	1209	1961	1959	121	-829	-6.198	0
3106	14	4	10	PNA	PNA	1137	1185	1874	1799	259	-737	-2.371	0
3106	14	5	10	PPL	PPL	1312	1345	1823	1754	283	-511	-1.445	0
3106	14	6	10	PPL	PPL	1453	1482	1915	1911	189	-462	-2.27	0
3106	14	7	10	PSA/PEA	PSA/PEA	2322	2292	2108	2154	189	214	0.73	0
3106	14	8	10	PSA/PEA	PSA/PEA	1984	2072	2126	2127	251	-142	-0.219	0
3106	14	9	10	PSL1A	PSL1A	1732	1896	2174	2148	259	-442	-0.973	0
3106	14	10	10	PSL1A	PSL1A	2303	3003	2261	2297	181	42	3.901	0
3106	14	11	10	PTL	PTL	2356	2351	2254	2264	192	102	0.453	0
3106	14	12	10	PTL	PTL	2437	2387	2310	2311	115	127	0.661	0
3106	14	1	11	RS-FUC	RS-FUC	982	1046	1995	2020	189	-1013	-5.153	0
3106	14	2	11	RS-FUC	RS-FUC	1091	1153	1996	2022	139	-905	-6.252	0
3106	14	3	11	SAMB	SAMB	18907	18267	1988	1985	124	16919	131.306	0
3106	14	4	11	SAMB	SAMB	21280	20241	1998	1947	302	19282	60.576	0
3106	14	5	11	SBA	SBA	710	949	1950	1916	281	-1240	-3.441	0
3106	14	6	11	SBA	SBA	855	1063	1981	1997	194	-1126	-4.814	0
3106	14	7	11	SJA	SJA	1320	1388	2122	2162	172	-802	-4.5	0
[truncated: 29 more rows]

## Sheet: lectin microarray 2
Sample Name	Block	Column	Row	Name	ID	F532 Median	F532 Mean	B532 Median	B532 Mean	B532 SD	F532 Median - B532	SNR 532	Flags
2644	1	1	1	POS1	POS1	15643	12581	893	888	121	14750	96.636	0
2644	1	2	1	POS1	POS1	18831	15207	1002	973	140	17829	101.671	0
2644	1	3	1	POS2	POS2	2338	2894	1050	1043	66	1288	28.045	0
2644	1	4	1	POS2	POS2	2336	3403	1056	1054	44	1280	53.386	0
2644	1	5	1	NEG	NEG	66	518	972	959	81	-906	-5.444	0
2644	1	6	1	NEG	NEG	105	543	1028	1032	62	-923	-7.887	0
2644	1	7	1	NEG	NEG	133	500	1075	1069	64	-942	-8.891	0
2644	1	8	1	NEG	NEG	203	765	1082	1072	78	-879	-3.936	0
2644	1	9	1	AAA	AAA	560	612	1130	1132	39	-570	-13.333	0
2644	1	10	1	AAA	AAA	511	593	1125	1081	175	-614	-2.789	0
2644	1	11	1	AAL	AAL	648	749	1129	1118	74	-481	-4.986	0
2644	1	12	1	AAL	AAL	666	781	1173	1171	50	-507	-7.8	0
2644	1	1	2	ACG	ACG	861	858	1029	1031	50	-168	-3.46	0
2644	1	2	2	ACG	ACG	773	783	1042	1005	136	-269	-1.632	0
2644	1	3	2	ACL	ACL	265	357	1052	1050	75	-787	-9.24	0
2644	1	4	2	ACL	ACL	306	391	1062	1058	77	-756	-8.662	0
2644	1	5	2	ASA	ASA	7227	7079	986	974	79	6241	77.278	0
2644	1	6	2	ASA	ASA	9422	8437	1014	1014	55	8408	134.964	0
2644	1	7	2	BANLEC	BANLEC	4346	3711	1056	1057	143	3290	18.559	0
2644	1	8	2	BANLEC	BANLEC	4753	3781	1064	1058	214	3689	12.724	0
2644	1	9	2	BC2L-A	BC2L-A	1182	1290	1111	1116	64	71	2.719	0
2644	1	10	2	BC2L-A	BC2L-A	1281	1230	1113	1075	189	168	0.82	0
2644	1	11	2	BC2LCN	BC2LCN	866	856	1132	1127	49	-266	-5.531	0
2644	1	12	2	BC2LCN	BC2LCN	909	902	1166	1164	49	-257	-5.347	0
2644	1	1	3	BPA; BPL	BPA; BPL	808	920	1041	1041	49	-233	-2.469	0
2644	1	2	3	BPA; BPL	BPA; BPL	917	899	1042	1014	340	-125	-0.338	0
2644	1	3	3	CALSEPA	CALSEPA	2071	5241	1030	1021	60	1041	70.333	0
2644	1	4	3	CALSEPA	CALSEPA	2367	5448	1041	1049	168	1326	26.185	0
2644	1	5	3	CGL2	CGL2	1162	1631	992	981	84	170	7.738	0
2644	1	6	3	CGL2	CGL2	1047	1609	1006	1004	64	41	9.453	0
2644	1	7	3	CNL	CNL	671	748	1051	1052	87	-380	-3.494	0
2644	1	8	3	CNL	CNL	654	680	1068	1054	78	-414	-4.795	0
2644	1	9	3	Con A	Con A	1035	1047	1116	1125	83	-81	-0.94	0
2644	1	10	3	Con A	Con A	913	911	1119	1065	192	-206	-0.802	0
2644	1	11	3	DBA	DBA	935	965	1140	1134	58	-205	-2.914	0
2644	1	12	3	DBA	DBA	1016	1066	1150	1141	74	-134	-1.014	0
2644	1	1	4	DISCOIDIN I	DISCOIDIN I	114	301	929	912	122	-815	-5.008	0
2644	1	2	4	DISCOIDIN I	DISCOIDIN I	146	337	994	967	134	-848	-4.701	0
2644	1	3	4	DISCOIDIN II	DISCOIDIN II	364	445	1034	1028	59	-670	-9.881	0
2644	1	4	4	DISCOIDIN II	DISCOIDIN II	374	475	1058	1060	49	-684	-11.939	0
2644	1	5	4	DSA	DSA	3000	2892	987	975	93	2013	20.613	0
2644	1	6	4	DSA	DSA	2908	2847	1010	1011	44	1898	41.727	0
2644	1	7	4	ECA	ECA	438	459	1053	1056	84	-615	-7.107	0
2644	1	8	4	ECA	ECA	447	598	1072	1062	78	-625	-5.949	0
2644	1	9	4	EEL	EEL	359	450	1120	1123	54	-761	-12.463	0
2644	1	10	4	EEL	EEL	335	423	1115	1066	188	-780	-3.42	0
2644	1	11	4	F17AG	F17AG	513	575	1135	1129	60	-622	-9.233	0
2644	1	12	4	F17AG	F17AG	511	582	1163	1161	49	-652	-11.816	0
2644	1	1	5	GAL1	GAL1	97	351	1053	1051	40	-956	-17.5	0
2644	1	2	5	GAL1	GAL1	95	398	1095	1075	173	-1000	-3.913	0
2644	1	3	5	GAL1-S	GAL1-S	167	293	1063	1076	100	-896	-7.83	0
2644	1	4	5	GAL1-S	GAL1-S	175	356	1047	1055	84	-872	-8.321	0
2644	1	5	5	GAL2	GAL2	623	634	985	955	133	-362	-2.414	0
2644	1	6	5	GAL2	GAL2	653	628	1032	1036	140	-379	-2.914	0
2644	1	7	5	GAL3	GAL3	62	215	1065	1067	89	-1003	-9.573	0
2644	1	8	5	GAL3	GAL3	53	225	1074	1066	92	-1021	-9.141	0
2644	1	9	5	GAL3C-S	GAL3C-S	1233	1190	1107	1107	42	126	1.976	0
2644	1	10	5	GAL3C-S	GAL3C-S	1250	1192	1101	1091	715	149	0.141	0
2644	1	11	5	GAL7-S	GAL7-S	965	918	1103	1098	167	-138	-1.078	0
2644	1	12	5	GAL7-S	GAL7-S	993	993	1158	1157	83	-165	-1.976	0
2644	1	1	6	GAL9	GAL9	103	267	1044	1048	56	-941	-13.946	0
2644	1	2	6	GAL9	GAL9	124	303	1018	995	158	-894	-4.38	0
2644	1	3	6	GNA	GNA	22198	23253	967	969	79	21231	282.076	0
2644	1	4	6	GNA	GNA	21124	21191	936	940	71	20188	285.225	0
2644	1	5	6	GRFT	GRFT	947	4566	962	940	94	-15	38.574	0
2644	1	6	6	GRFT	GRFT	3301	4740	1026	1024	42	2275	88.476	0
2644	1	7	6	GS-I;?GSL-I	GS-I;?GSL-I	921	900	1065	1063	96	-144	-1.698	0
2644	1	8	6	GS-I;?GSL-I	GS-I;?GSL-I	860	841	1074	1066	95	-214	-2.368	0
2644	1	9	6	GS-II; GSL-II	GS-II; GSL-II	607	671	1103	1105	48	-496	-9.042	0
2644	1	10	6	GS-II; GSL-II	GS-II; GSL-II	773	793	1100	1056	156	-327	-1.686	0
2644	1	11	6	HHA; HHL	HHA; HHL	14231	12930	1128	1128	59	13103	200.034	0
2644	1	12	6	HHA; HHL	HHA; HHL	12903	11626	1164	1164	48	11739	217.958	0
2644	1	1	7	Jacalin	Jacalin	608	641	1027	1025	49	-419	-7.837	0
2644	1	2	7	Jacalin	Jacalin	598	622	1017	981	136	-419	-2.64	0
2644	1	3	7	LBA	LBA	378	383	1002	998	58	-624	-10.603	0
2644	1	4	7	LBA	LBA	386	411	947	925	97	-561	-5.299	0
2644	1	5	7	LcH A	LcH A	699	720	955	936	90	-256	-2.4	0
2644	1	6	7	LcH A	LcH A	836	883	1016	1022	198	-180	-0.702	0
2644	1	7	7	LEA	LEA	591	625	1041	1049	463	-450	-0.916	0
2644	1	8	7	LEA	LEA	620	647	1053	1061	401	-433	-1.032	0
2644	1	9	7	LENTIL	LENTIL	1027	1046	1089	1089	44	-62	-0.977	0
2644	1	10	7	LENTIL	LENTIL	1003	1036	1089	1036	175	-86	0	0
2644	1	11	7	Lotus	Lotus	823	788	1106	1097	67	-283	-4.612	0
2644	1	12	7	Lotus	Lotus	741	734	1142	1140	52	-401	-7.808	0
2644	1	1	8	LSL-N	LSL-N	1569	1584	1048	1047	47	521	11.426	0
2644	1	2	8	LSL-N	LSL-N	1672	1585	1027	998	136	645	4.316	0
2644	1	3	8	MAA; MAL	MAA; MAL	3023	2726	1015	1008	56	2008	30.679	0
2644	1	4	8	MAA; MAL	MAA; MAL	3013	2793	1003	1000	50	2010	35.86	0
2644	1	5	8	MALECTIN	MALECTIN	816	829	979	966	81	-163	-1.691	0
2644	1	6	8	MALECTIN	MALECTIN	599	638	1009	1010	45	-410	-8.267	0
2644	1	7	8	MOA	MOA	424	450	1020	1013	93	-596	-6.054	0
2644	1	8	8	MOA	MOA	421	485	1021	1017	88	-600	-6.045	0
2644	1	9	8	MPL; MPA	MPL; MPA	1674	1499	1058	1065	258	616	1.682	0
2644	1	10	8	MPL; MPA	MPL; MPA	1395	1315	1063	1013	186	332	1.624	0
2644	1	11	8	NPA	NPA	8552	7197	1077	1077	49	7475	124.898	0
2644	1	12	8	NPA	NPA	9071	7708	1111	1115	152	7960	43.375	0
2644	1	1	9	ORYSATA	ORYSATA	775	688	1061	1062	41	-286	-9.122	0
2644	1	2	9	ORYSATA	ORYSATA	745	687	1034	992	146	-289	-2.089	0
2644	1	3	9	PA-IIL	PA-IIL	220	542	1024	1016	59	-804	-8.034	0
2644	1	4	9	PA-IIL	PA-IIL	227	568	1012	1011	48	-785	-9.229	0
2644	1	5	9	PA-IL	PA-IL	344	364	1022	1006	87	-678	-7.379	0
2644	1	6	9	PA-IL	PA-IL	328	341	1068	1068	40	-740	-18.175	0
2644	1	7	9	PALa	PALa	1089	1856	1069	1082	191	20	4.052	0
2644	1	8	9	PALa	PALa	1060	1548	1071	1057	89	-11	5.517	0
2644	1	9	9	PHA-E	PHA-E	2177	2132	1113	1115	49	1064	20.755	0
2644	1	10	9	PHA-E	PHA-E	1999	1976	1117	1061	185	882	4.946	0
2644	1	11	9	PHA-L	PHA-L	702	682	1120	1117	42	-418	-10.357	0
2644	1	12	9	PHA-L	PHA-L	937	995	1138	1136	49	-201	-2.878	0
2644	1	1	10	PHA-P	PHA-P	978	989	1084	1085	39	-106	-2.462	0
2644	1	2	10	PHA-P	PHA-P	920	930	1054	1011	153	-134	-0.529	0
2644	1	3	10	PNA	PNA	473	530	1042	1034	59	-569	-8.542	0
2644	1	4	10	PNA	PNA	483	537	1048	1049	43	-565	-11.907	0
2644	1	5	10	PPL	PPL	898	765	1062	1050	87	-164	-3.276	0
2644	1	6	10	PPL	PPL	891	828	1092	1092	42	-201	-6.286	0
2644	1	7	10	PSA/PEA	PSA/PEA	1193	1199	1090	1081	63	103	1.873	0
2644	1	8	10	PSA/PEA	PSA/PEA	1177	1172	1090	1074	78	87	1.256	0
2644	1	9	10	PSL1A	PSL1A	1093	1778	1129	1146	233	-36	2.712	0
2644	1	10	10	PSL1A	PSL1A	1185	2158	1137	1109	358	48	2.93	0
2644	1	11	10	PTL	PTL	1283	1241	1130	1129	46	153	2.435	0
2644	1	12	10	PTL	PTL	1288	1310	1141	1139	50	147	3.42	0
2644	1	1	11	RS-FUC	RS-FUC	514	532	1101	1108	228	-587	-2.526	0
2644	1	2	11	RS-FUC	RS-FUC	558	535	1073	1030	152	-515	-3.257	0
2644	1	3	11	SAMB	SAMB	9218	8135	1069	1077	169	8149	41.763	0
2644	1	4	11	SAMB	SAMB	8716	9365	1074	1081	77	7642	107.584	0
2644	1	5	11	SBA	SBA	475	538	1080	1065	83	-605	-6.349	0
2644	1	6	11	SBA	SBA	438	508	1131	1131	51	-693	-12.216	0
2644	1	7	11	SJA	SJA	677	682	1127	1120	71	-450	-6.169	0
2644	1	8	11	SJA	SJA	750	746	1120	1114	178	-370	-2.067	0
2644	1	9	11	SNA-I	SNA-I	3405	3128	1143	1144	38	2262	52.211	0
2644	1	10	11	SNA-I	SNA-I	4252	3991	1150	1091	185	3102	15.676	0
2644	1	11	11	SNA-II	SNA-II	882	907	1157	1157	74	-275	-3.378	0
2644	1	12	11	SNA-II	SNA-II	902	871	1167	1166	48	-265	-6.146	0
2644	1	1	12	STL	STL	2327	2314	1124	1130	169	1203	7.006	0
2644	1	2	12	STL	STL	2147	2070	1104	1067	148	1043	6.777	0
2644	1	3	12	UDA	UDA	862	866	1074	1063	65	-212	-3.031	0
2644	1	4	12	UDA	UDA	879	874	1064	1065	46	-185	-4.152	0
2644	1	5	12	UEA I	UEA I	1325	1328	1101	1082	92	224	2.674	0
2644	1	6	12	UEA I	UEA I	1209	1201	1174	1174	98	35	0.276	0
2644	1	7	12	UEA-II	UEA-II	998	998	1156	1148	65	-158	-2.308	0
2644	1	8	12	UEA-II	UEA-II	975	973	1122	1111	77	-147	-1.792	0
2644	1	9	12	VFA	VFA	974	1006	1166	1169	49	-192	-3.327	0
2644	1	10	12	VFA	VFA	1080	1103	1172	1117	184	-92	-0.076	0
2644	1	11	12	VVA	VVA	8182	8870	1182	1184	86	7000	89.372	0
2644	1	12	12	VVA	VVA	7249	6885	1201	1206	121	6048	46.934	0
2644	1	1	13	WFA	WFA	488	568	1136	1135	40	-648	-14.175	0
2644	1	2	13	WFA	WFA	515	575	1108	1063	158	-593	-3.089	0
2644	1	3	13	WGA	WGA	1318	1294	1107	1098	67	211	2.925	0
2644	1	4	13	WGA	WGA	1112	1102	1081	1080	46	31	0.478	0
2644	1	5	13	NEG	NEG	87	318	1101	1080	96	-1014	-7.937	0
2644	1	6	13	NEG	NEG	92	353	1137	1136	40	-1045	-19.575	0
2644	1	7	13	NEG	NEG	161	283	1142	1136	61	-981	-13.984	0
2644	1	8	13	NEG	NEG	157	353	1126	1115	76	-969	-10.026	0
2644	1	9	13	POS2	POS2	6924	7978	1175	1177	48	5749	141.688	0
2644	1	10	13	POS2	POS2	8055	7816	1202	1179	194	6853	34.211	0
2644	1	11	13	POS1	POS1	21255	20780	1213	1213	81	20042	241.568	0
2644	1	12	13	POS1	POS1	23374	21804	1237	1238	49	22137	419.714	0
3107	2	1	1	POS1	POS1	15270	12655	1477	1474	118	13793	94.754	0
3107	2	2	1	POS1	POS1	17586	14876	1481	1430	203	16105	66.236	0
3107	2	3	1	POS2	POS2	2187	2675	1549	1551	72	638	15.611	0
3107	2	4	1	POS2	POS2	2173	3136	1575	1557	109	598	14.486	0
3107	2	5	1	NEG	NEG	157	596	1563	1540	116	-1406	-8.138	0
3107	2	6	1	NEG	NEG	100	605	1403	1395	209	-1303	-3.78	0
3107	2	7	1	NEG	NEG	195	573	1511	1486	130	-1316	-7.023	0
3107	2	8	1	NEG	NEG	169	631	1531	1528	95	-1362	-9.442	0
3107	2	9	1	AAA	AAA	730	790	1611	1603	90	-881	-9.033	0
3107	2	10	1	AAA	AAA	801	885	1662	1645	134	-861	-5.672	0
3107	2	11	1	AAL	AAL	849	990	1763	1754	94	-914	-8.128	0
3107	2	12	1	AAL	AAL	890	1057	1803	1770	141	-913	-5.057	0
3107	2	1	2	ACG	ACG	1308	1318	1422	1428	140	-114	-0.786	0
3107	2	2	2	ACG	ACG	1267	1254	1418	1370	187	-151	-0.62	0
3107	2	3	2	ACL	ACL	390	528	1517	1523	77	-1127	-12.922	0
3107	2	4	2	ACL	ACL	441	562	1558	1545	142	-1117	-6.923	0
3107	2	5	2	ASA	ASA	4931	6938	1534	1512	122	3397	44.475	0
3107	2	6	2	ASA	ASA	7066	8106	1396	1388	105	5670	63.981	0
3107	2	7	2	BANLEC	BANLEC	6279	5280	1546	1538	103	4733	36.33	0
3107	2	8	2	BANLEC	BANLEC	6690	5456	1535	1539	81	5155	48.358	0
3107	2	9	2	BC2L-A	BC2L-A	1180	1303	1595	1587	93	-415	-3.054	0
3107	2	10	2	BC2L-A	BC2L-A	1548	1458	1635	1641	239	-87	-0.766	0
3107	2	11	2	BC2LCN	BC2LCN	1311	1227	1746	1742	91	-435	-5.659	0
3107	2	12	2	BC2LCN	BC2LCN	1381	1329	1775	1750	133	-394	-3.165	0
3107	2	1	3	BPA; BPL	BPA; BPL	828	823	1320	1332	163	-492	-3.123	0
3107	2	2	3	BPA; BPL	BPA; BPL	937	939	1392	1352	197	-455	-2.096	0
3107	2	3	3	CALSEPA	CALSEPA	3630	8818	1430	1443	103	2200	71.602	0
3107	2	4	3	CALSEPA	CALSEPA	4406	8320	1491	1480	141	2915	48.511	0
3107	2	5	3	CGL2	CGL2	1500	2421	1486	1465	143	14	6.685	0
3107	2	6	3	CGL2	CGL2	1736	2680	1395	1394	101	341	12.733	0
3107	2	7	3	CNL	CNL	891	937	1551	1527	186	-660	-3.172	0
3107	2	8	3	CNL	CNL	890	939	1530	1540	107	-640	-5.617	0
3107	2	9	3	Con A	Con A	1138	1173	1583	1600	145	-445	-2.945	0
3107	2	10	3	Con A	Con A	1317	1313	1625	1623	163	-308	-1.902	0
3107	2	11	3	DBA	DBA	959	1089	1732	1735	95	-773	-6.8	0
3107	2	12	3	DBA	DBA	1036	1205	1789	1759	142	-753	-3.901	0
3107	2	1	4	DISCOIDIN I	DISCOIDIN I	202	406	1405	1396	105	-1203	-9.429	0
3107	2	2	4	DISCOIDIN I	DISCOIDIN I	221	418	1366	1344	214	-1145	-4.327	0
3107	2	3	4	DISCOIDIN II	DISCOIDIN II	596	695	1395	1418	133	-799	-5.436	0
3107	2	4	4	DISCOIDIN II	DISCOIDIN II	509	655	1427	1419	114	-918	-6.702	0
3107	2	5	4	DSA	DSA	4633	4407	1431	1419	120	3202	24.9	0
3107	2	6	4	DSA	DSA	4101	3915	1366	1348	108	2735	23.769	0
3107	2	7	4	ECA	ECA	528	759	1522	1524	139	-994	-5.504	0
3107	2	8	4	ECA	ECA	527	551	1587	1591	88	-1060	-11.818	0
3107	2	9	4	EEL	EEL	910	994	1578	1586	124	-668	-4.774	0
3107	2	10	4	EEL	EEL	895	977	1617	1604	153	-722	-4.098	0
3107	2	11	4	F17AG	F17AG	679	743	1661	1658	102	-982	-8.971	0
3107	2	12	4	F17AG	F17AG	710	760	1681	1651	171	-971	-5.211	0
3107	2	1	5	GAL1	GAL1	135	390	1427	1433	134	-1292	-7.784	0
3107	2	2	5	GAL1	GAL1	187	568	1462	1427	236	-1275	-3.64	0
3107	2	3	5	GAL1-S	GAL1-S	265	553	1456	1469	160	-1191	-5.725	0
3107	2	4	5	GAL1-S	GAL1-S	331	559	1452	1466	149	-1121	-6.087	0
3107	2	5	5	GAL2	GAL2	695	720	1437	1455	178	-742	-4.129	0
3107	2	6	5	GAL2	GAL2	630	611	1363	1362	174	-733	-4.316	0
3107	2	7	5	GAL3	GAL3	74	335	1542	1542	112	-1468	-10.777	0
3107	2	8	5	GAL3	GAL3	77	284	1585	1589	90	-1508	-14.5	0
3107	2	9	5	GAL3C-S	GAL3C-S	1770	1811	1590	1592	110	180	1.991	0
3107	2	10	5	GAL3C-S	GAL3C-S	1722	1744	1634	1620	132	88	0.939	0
3107	2	11	5	GAL7-S	GAL7-S	1535	1447	1653	1656	86	-118	-2.43	0
3107	2	12	5	GAL7-S	GAL7-S	1502	1385	1714	1696	133	-212	-2.338	0
3107	2	1	6	GAL9	GAL9	142	353	1395	1393	113	-1253	-9.204	0
3107	2	2	6	GAL9	GAL9	190	386	1380	1347	215	-1190	-4.47	0
3107	2	3	6	GNA	GNA	25847	27658	1384	1398	119	24463	220.672	0
3107	2	4	6	GNA	GNA	24656	25414	1270	1281	159	23386	151.78	0
3107	2	5	6	GRFT	GRFT	1241	5038	1275	1268	169	-34	22.308	0
3107	2	6	6	GRFT	GRFT	1348	5737	1226	1221	168	122	26.881	0
3107	2	7	6	GS-I;?GSL-I	GS-I;?GSL-I	1408	1340	1483	1475	99	-75	-1.364	0
3107	2	8	6	GS-I;?GSL-I	GS-I;?GSL-I	1299	1279	1579	1578	100	-280	-2.99	0
3107	2	9	6	GS-II; GSL-II	GS-II; GSL-II	833	926	1612	1615	82	-779	-8.402	0
3107	2	10	6	GS-II; GSL-II	GS-II; GSL-II	526	630	1618	1613	123	-1092	-7.992	0
3107	2	11	6	HHA; HHL	HHA; HHL	16683	13945	1652	1654	97	15031	126.711	0
3107	2	12	6	HHA; HHL	HHA; HHL	17347	15122	1703	1687	114	15644	117.851	0
3107	2	1	7	Jacalin	Jacalin	676	749	1438	1426	107	-762	-6.327	0
3107	2	2	7	Jacalin	Jacalin	779	859	1369	1335	333	-590	-1.429	0
3107	2	3	7	LBA	LBA	328	348	1366	1350	142	-1038	-7.056	0
3107	2	4	7	LBA	LBA	394	422	1195	1194	98	-801	-7.878	0
3107	2	5	7	LcH A	LcH A	856	941	922	926	121	-66	0.124	0
3107	2	6	7	LcH A	LcH A	971	991	1182	1153	144	-211	-1.125	0
3107	2	7	7	LEA	LEA	722	763	1422	1406	105	-700	-6.124	0
3107	2	8	7	LEA	LEA	773	808	1496	1494	98	-723	-7	0
3107	2	9	7	LENTIL	LENTIL	1680	1718	1599	1595	123	81	1	0
3107	2	10	7	LENTIL	LENTIL	1693	1784	1576	1561	127	117	1.756	0
3107	2	11	7	Lotus	Lotus	1134	1009	1621	1618	82	-487	-7.427	0
3107	2	12	7	Lotus	Lotus	1153	1035	1609	1597	121	-456	-4.645	0
3107	2	1	8	LSL-N	LSL-N	1784	1805	1477	1465	95	307	3.579	0
3107	2	2	8	LSL-N	LSL-N	1762	1750	1425	1385	199	337	1.834	0
3107	2	3	8	MAA; MAL	MAA; MAL	5187	4667	1403	1418	161	3784	20.18	0
3107	2	4	8	MAA; MAL	MAA; MAL	5337	4835	1257	1267	123	4080	29.008	0
3107	2	5	8	MALECTIN	MALECTIN	854	841	1227	1205	126	-373	-2.889	0
3107	2	6	8	MALECTIN	MALECTIN	1110	1083	1310	1308	91	-200	-2.473	0
3107	2	7	8	MOA	MOA	556	750	1417	1406	104	-861	-6.308	0
3107	2	8	8	MOA	MOA	515	773	1465	1465	86	-950	-8.047	0
3107	2	9	8	MPL; MPA	MPL; MPA	2072	1888	1524	1511	120	548	3.142	0
3107	2	10	8	MPL; MPA	MPL; MPA	1803	1697	1519	1511	153	284	1.216	0
3107	2	11	8	NPA	NPA	10161	8885	1546	1549	78	8615	94.051	0
3107	2	12	8	NPA	NPA	11060	9445	1535	1528	133	9525	59.526	0
3107	2	1	9	ORYSATA	ORYSATA	1068	1004	1462	1445	113	-394	-3.903	0
3107	2	2	9	ORYSATA	ORYSATA	988	937	1437	1382	198	-449	-2.247	0
3107	2	3	9	PA-IIL	PA-IIL	436	667	1434	1448	108	-998	-7.231	0
3107	2	4	9	PA-IIL	PA-IIL	450	658	1283	1277	84	-833	-7.369	0
3107	2	5	9	PA-IL	PA-IL	400	470	1320	1313	104	-920	-8.106	0
3107	2	6	9	PA-IL	PA-IL	517	552	1398	1397	73	-881	-11.575	0
3107	2	7	9	PALa	PALa	605	1467	1527	1520	102	-922	-0.52	0
3107	2	8	9	PALa	PALa	436	996	1575	1561	116	-1139	-4.871	0
3107	2	9	9	PHA-E	PHA-E	3071	2999	1631	1622	88	1440	15.648	0
3107	2	10	9	PHA-E	PHA-E	3277	3142	1648	1632	131	1629	11.527	0
3107	2	11	9	PHA-L	PHA-L	1132	1151	1644	1646	77	-512	-6.429	0
3107	2	12	9	PHA-L	PHA-L	1241	1273	1662	1646	110	-421	-3.391	0
3107	2	1	10	PHA-P	PHA-P	1162	1169	1478	1462	102	-316	-2.873	0
3107	2	2	10	PHA-P	PHA-P	1214	1206	1474	1424	208	-260	-1.048	0
3107	2	3	10	PNA	PNA	569	654	1429	1437	93	-860	-8.419	0
3107	2	4	10	PNA	PNA	492	558	1310	1305	83	-818	-9	0
3107	2	5	10	PPL	PPL	932	847	1370	1355	97	-438	-5.237	0
3107	2	6	10	PPL	PPL	962	966	1450	1448	76	-488	-6.342	0
3107	2	7	10	PSA/PEA	PSA/PEA	1816	1820	1557	1539	101	259	2.782	0
3107	2	8	10	PSA/PEA	PSA/PEA	1747	1784	1623	1617	78	124	2.141	0
3107	2	9	10	PSL1A	PSL1A	1438	3876	1658	1647	96	-220	23.219	0
3107	2	10	10	PSL1A	PSL1A	1841	4774	1692	1674	118	149	26.271	0
3107	2	11	10	PTL	PTL	1731	1706	1623	1614	100	108	0.92	0
3107	2	12	10	PTL	PTL	1825	1780	1655	1639	101	170	1.396	0
3107	2	1	11	RS-FUC	RS-FUC	733	662	1490	1478	96	-757	-8.5	0
3107	2	2	11	RS-FUC	RS-FUC	676	644	1481	1418	212	-805	-3.651	0
3107	2	3	11	SAMB	SAMB	12979	13939	1456	1458	75	11523	166.413	0
3107	2	4	11	SAMB	SAMB	11642	10668	1344	1354	161	10298	57.851	0
3107	2	5	11	SBA	SBA	694	758	1386	1374	134	-692	-4.597	0
3107	2	6	11	SBA	SBA	545	718	1455	1455	74	-910	-9.959	0
3107	2	7	11	SJA	SJA	862	844	1572	1555	103	-710	-6.903	0
3107	2	8	11	SJA	SJA	971	973	1617	1601	459	-646	-1.368	0
3107	2	9	11	SNA-I	SNA-I	3288	3211	1701	1681	106	1587	14.434	0
3107	2	10	11	SNA-I	SNA-I	4803	4552	1739	1713	147	3064	19.313	0
3107	2	11	11	SNA-II	SNA-II	1236	1162	1698	1701	96	-462	-5.615	0
3107	2	12	11	SNA-II	SNA-II	1164	1130	1695	1680	113	-531	-4.867	0
3107	2	1	12	STL	STL	2846	2801	1493	1482	100	1353	13.19	0
3107	2	2	12	STL	STL	2642	2574	1464	1412	201	1178	5.781	0
3107	2	3	12	UDA	UDA	1020	1023	1461	1462	139	-441	-3.158	0
3107	2	4	12	UDA	UDA	849	881	1322	1318	103	-473	-4.243	0
3107	2	5	12	UEA I	UEA I	1135	1150	1400	1399	140	-265	-1.779	0
3107	2	6	12	UEA I	UEA I	1266	1263	1435	1440	74	-169	-2.392	0
3107	2	7	12	UEA-II	UEA-II	1519	1511	1532	1536	494	-13	-0.051	0
3107	2	8	12	UEA-II	UEA-II	1554	1568	1639	1642	97	-85	-0.763	0
3107	2	9	12	VFA	VFA	1563	1570	1743	1727	105	-180	-1.495	0
3107	2	10	12	VFA	VFA	1437	1484	1770	1745	140	-333	-1.864	0
3107	2	11	12	VVA	VVA	7445	8365	1734	1739	94	5711	70.489	0
3107	2	12	12	VVA	VVA	7388	7748	1707	1690	117	5681	51.778	0
3107	2	1	13	WFA	WFA	567	673	1462	1453	102	-895	-7.647	0
3107	2	2	13	WFA	WFA	574	657	1456	1403	202	-882	-3.693	0
3107	2	3	13	WGA	WGA	1631	1566	1481	1481	70	150	1.214	0
3107	2	4	13	WGA	WGA	1430	1363	1330	1325	99	100	0.384	0
3107	2	5	13	NEG	NEG	86	351	1376	1358	141	-1290	-7.142	0
3107	2	6	13	NEG	NEG	109	421	1411	1418	79	-1302	-12.62	0
3107	2	7	13	NEG	NEG	159	301	1551	1542	102	-1392	-12.167	0
3107	2	8	13	NEG	NEG	219	312	1693	1688	230	-1474	-5.983	0
3107	2	9	13	POS2	POS2	6600	6892	1762	1750	94	4838	54.702	0
3107	2	10	13	POS2	POS2	7405	7614	1763	1742	137	5642	42.861	0
3107	2	11	13	POS1	POS1	21482	21096	1767	1768	89	19715	217.169	0
3107	2	12	13	POS1	POS1	22808	21127	1692	1679	115	21116	169.113	0
2642	3	1	1	POS1	POS1	16581	12757	1264	1266	49	15317	234.51	0
2642	3	2	1	POS1	POS1	17867	14756	1213	1164	170	16654	79.953	0
2642	3	3	1	POS2	POS2	2341	3005	1201	1196	77	1140	23.494	0
2642	3	4	1	POS2	POS2	2382	3339	1204	1205	67	1178	31.851	0
2642	3	5	1	NEG	NEG	108	623	1164	1151	97	-1056	-5.443	0
2642	3	6	1	NEG	NEG	121	655	1175	1179	53	-1054	-9.887	0
2642	3	7	1	NEG	NEG	173	500	1127	1120	65	-954	-9.538	0
2642	3	8	1	NEG	NEG	195	557	1112	1103	182	-917	-3	0
2642	3	9	1	AAA	AAA	476	542	1140	1140	45	-664	-13.289	0
2642	3	10	1	AAA	AAA	567	613	1120	1076	165	-553	-2.806	0
2642	3	11	1	AAL	AAL	585	654	1143	1145	76	-558	-6.461	0
2642	3	12	1	AAL	AAL	633	728	1191	1207	100	-558	-4.79	0
2642	3	1	2	ACG	ACG	986	982	1237	1237	54	-251	-4.722	0
2642	3	2	2	ACG	ACG	925	931	1203	1155	167	-278	-1.341	0
2642	3	3	2	ACL	ACL	363	446	1181	1177	89	-818	-8.213	0
2642	3	4	2	ACL	ACL	398	491	1177	1178	93	-779	-7.387	0
2642	3	5	2	ASA	ASA	10865	8635	1137	1127	79	9728	95.038	0
2642	3	6	2	ASA	ASA	11259	9193	1172	1174	48	10087	167.063	0
2642	3	7	2	BANLEC	BANLEC	3265	2899	1125	1126	107	2140	16.57	0
2642	3	8	2	BANLEC	BANLEC	3617	3100	1112	1104	147	2505	13.578	0
2642	3	9	2	BC2L-A	BC2L-A	892	1025	1126	1131	204	-234	-0.52	0
2642	3	10	2	BC2L-A	BC2L-A	1198	1155	1107	1067	159	91	0.553	0
2642	3	11	2	BC2LCN	BC2LCN	682	694	1079	1071	91	-397	-4.143	0
2642	3	12	2	BC2LCN	BC2LCN	846	817	1161	1167	69	-315	-5.072	0
2642	3	1	3	BPA; BPL	BPA; BPL	734	742	1212	1223	245	-478	-1.963	0
2642	3	2	3	BPA; BPL	BPA; BPL	860	867	1175	1124	171	-315	-1.503	0
2642	3	3	3	CALSEPA	CALSEPA	2100	4668	1151	1142	66	949	53.424	0
2642	3	4	3	CALSEPA	CALSEPA	2399	5264	1144	1145	63	1255	65.381	0
2642	3	5	3	CGL2	CGL2	1432	1769	1109	1113	195	323	3.364	0
2642	3	6	3	CGL2	CGL2	1453	2037	1108	1107	46	345	20.217	0
2642	3	7	3	CNL	CNL	656	703	1120	1110	73	-464	-5.575	0
2642	3	8	3	CNL	CNL	834	731	1086	1074	81	-252	-4.235	0
2642	3	9	3	Con A	Con A	755	772	1119	1128	254	-364	-1.402	0
2642	3	10	3	Con A	Con A	814	831	1103	1047	182	-289	-1.187	0
2642	3	11	3	DBA	DBA	909	944	1121	1120	50	-212	-3.52	0
2642	3	12	3	DBA	DBA	997	1053	1145	1141	60	-148	-1.467	0
2642	3	1	4	DISCOIDIN I	DISCOIDIN I	212	358	1200	1206	84	-988	-10.095	0
2642	3	2	4	DISCOIDIN I	DISCOIDIN I	270	421	1154	1114	165	-884	-4.2	0
2642	3	3	4	DISCOIDIN II	DISCOIDIN II	450	512	1133	1129	70	-683	-8.814	0
2642	3	4	4	DISCOIDIN II	DISCOIDIN II	431	505	1128	1132	62	-697	-10.113	0
2642	3	5	4	DSA	DSA	3304	3214	1069	1059	144	2235	14.965	0
2642	3	6	4	DSA	DSA	3178	3102	1085	1086	105	2093	19.2	0
2642	3	7	4	ECA	ECA	499	515	1115	1110	63	-616	-9.444	0
2642	3	8	4	ECA	ECA	475	489	1084	1070	77	-609	-7.545	0
2642	3	9	4	EEL	EEL	387	470	1121	1124	47	-734	-13.915	0
2642	3	10	4	EEL	EEL	312	414	1103	1049	185	-791	-3.432	0
2642	3	11	4	F17AG	F17AG	497	565	1097	1099	58	-600	-9.207	0
2642	3	12	4	F17AG	F17AG	488	557	1103	1090	150	-615	-3.553	0
2642	3	1	5	GAL1	GAL1	78	349	1179	1179	47	-1101	-17.66	0
2642	3	2	5	GAL1	GAL1	125	346	1130	1079	177	-1005	-4.141	0
2642	3	3	5	GAL1-S	GAL1-S	192	314	1093	1085	68	-901	-11.338	0
2642	3	4	5	GAL1-S	GAL1-S	184	332	1087	1083	59	-903	-12.729	0
2642	3	5	5	GAL2	GAL2	624	604	1044	1039	118	-420	-3.686	0
2642	3	6	5	GAL2	GAL2	740	769	1102	1107	86	-362	-3.93	0
2642	3	7	5	GAL3	GAL3	56	224	1121	1113	72	-1065	-12.347	0
2642	3	8	5	GAL3	GAL3	79	310	1072	1061	74	-993	-10.149	0
2642	3	9	5	GAL3C-S	GAL3C-S	1245	1189	1098	1098	70	147	1.3	0
2642	3	10	5	GAL3C-S	GAL3C-S	1193	1140	1096	1044	178	97	0.539	0
2642	3	11	5	GAL7-S	GAL7-S	778	727	1063	1059	66	-285	-5.03	0
2642	3	12	5	GAL7-S	GAL7-S	772	726	1104	1100	65	-332	-5.754	0
2642	3	1	6	GAL9	GAL9	176	364	1132	1132	45	-956	-17.067	0
2642	3	2	6	GAL9	GAL9	206	374	1086	1038	168	-880	-3.952	0
2642	3	3	6	GNA	GNA	20930	21326	1044	1050	104	19886	194.962	0
2642	3	4	6	GNA	GNA	18652	19911	1018	1027	106	17634	178.151	0
2642	3	5	6	GRFT	GRFT	1399	5024	994	990	82	405	49.195	0
2642	3	6	6	GRFT	GRFT	1918	4749	1075	1076	55	843	66.782	0
2642	3	7	6	GS-I;?GSL-I	GS-I;?GSL-I	928	924	1100	1094	73	-172	-2.329	0
2642	3	8	6	GS-I;?GSL-I	GS-I;?GSL-I	764	792	1078	1063	85	-314	-3.188	0
2642	3	9	6	GS-II; GSL-II	GS-II; GSL-II	509	544	1084	1085	41	-575	-13.195	0
2642	3	10	6	GS-II; GSL-II	GS-II; GSL-II	751	737	1081	1037	164	-330	-1.829	0
2642	3	11	6	HHA; HHL	HHA; HHL	13356	10637	1070	1063	73	12286	131.151	0
2642	3	12	6	HHA; HHL	HHA; HHL	13041	11287	1096	1094	47	11945	216.872	0
2642	3	1	7	Jacalin	Jacalin	740	779	1158	1157	45	-418	-8.4	0
2642	3	2	7	Jacalin	Jacalin	741	765	1111	1064	168	-370	-1.78	0
2642	3	3	7	LBA	LBA	410	549	1077	1067	68	-667	-7.618	0
2642	3	4	7	LBA	LBA	455	483	992	993	125	-537	-4.08	0
2642	3	5	7	LcH A	LcH A	642	673	949	926	91	-307	-2.78	0
2642	3	6	7	LcH A	LcH A	920	928	1058	1058	55	-138	-2.364	0
2642	3	7	7	LEA	LEA	664	695	1060	1057	77	-396	-4.701	0
2642	3	8	7	LEA	LEA	569	595	1044	1034	83	-475	-5.289	0
2642	3	9	7	LENTIL	LENTIL	918	925	1054	1054	46	-136	-2.804	0
2642	3	10	7	LENTIL	LENTIL	945	959	1056	1004	172	-111	-0.262	0
2642	3	11	7	Lotus	Lotus	636	618	1081	1081	56	-445	-8.268	0
2642	3	12	7	Lotus	Lotus	697	663	1067	1083	293	-370	-1.433	0
2642	3	1	8	LSL-N	LSL-N	1594	1584	1149	1158	86	445	4.953	0
2642	3	2	8	LSL-N	LSL-N	1564	1679	1125	1084	170	439	3.5	0
2642	3	3	8	MAA; MAL	MAA; MAL	3260	2971	1092	1087	109	2168	17.284	0
2642	3	4	8	MAA; MAL	MAA; MAL	2952	2734	1038	1038	49	1914	34.612	0
2642	3	5	8	MALECTIN	MALECTIN	712	730	1012	1002	84	-300	-3.238	0
2642	3	6	8	MALECTIN	MALECTIN	614	634	1055	1055	49	-441	-8.592	0
2642	3	7	8	MOA	MOA	433	541	1033	1023	76	-600	-6.342	0
2642	3	8	8	MOA	MOA	432	554	1033	1016	86	-601	-5.372	0
2642	3	9	8	MPL; MPA	MPL; MPA	1369	1272	1052	1057	97	317	2.216	0
2642	3	10	8	MPL; MPA	MPL; MPA	1262	1212	1043	996	171	219	1.263	0
2642	3	11	8	NPA	NPA	8446	7463	1075	1092	112	7371	56.884	0
2642	3	12	8	NPA	NPA	8540	7447	1048	1045	69	7492	92.783	0
2642	3	1	9	ORYSATA	ORYSATA	812	813	1156	1159	51	-344	-6.784	0
2642	3	2	9	ORYSATA	ORYSATA	805	773	1118	1070	167	-313	-1.778	0
2642	3	3	9	PA-IIL	PA-IIL	445	573	1086	1064	102	-641	-4.814	0
2642	3	4	9	PA-IIL	PA-IIL	380	549	1065	1061	66	-685	-7.758	0
2642	3	5	9	PA-IL	PA-IL	328	365	1051	1036	82	-723	-8.183	0
2642	3	6	9	PA-IL	PA-IL	340	366	1092	1093	50	-752	-14.54	0
2642	3	7	9	PALa	PALa	674	1299	1076	1068	59	-402	3.915	0
2642	3	8	9	PALa	PALa	749	1481	1056	1048	87	-307	4.977	0
2642	3	9	9	PHA-E	PHA-E	2023	1932	1113	1116	50	910	16.32	0
2642	3	10	9	PHA-E	PHA-E	1900	1819	1091	1045	169	809	4.58	0
2642	3	11	9	PHA-L	PHA-L	568	647	1112	1113	56	-544	-8.321	0
2642	3	12	9	PHA-L	PHA-L	826	855	1099	1099	48	-273	-5.083	0
2642	3	1	10	PHA-P	PHA-P	1087	1075	1161	1163	52	-74	-1.692	0
2642	3	2	10	PHA-P	PHA-P	1098	1092	1122	1081	225	-24	0.049	0
2642	3	3	10	PNA	PNA	508	587	1106	1099	68	-598	-7.529	0
2642	3	4	10	PNA	PNA	507	575	1092	1094	53	-585	-9.792	0
2642	3	5	10	PPL	PPL	849	781	1079	1066	78	-230	-3.654	0
2642	3	6	10	PPL	PPL	931	856	1110	1116	60	-179	-4.333	0
2642	3	7	10	PSA/PEA	PSA/PEA	989	996	1085	1076	60	-96	-1.333	0
2642	3	8	10	PSA/PEA	PSA/PEA	933	943	1080	1069	83	-147	-1.518	0
2642	3	9	10	PSL1A	PSL1A	1016	1862	1104	1107	52	-88	14.519	0
2642	3	10	10	PSL1A	PSL1A	1360	2515	1101	1070	153	259	9.444	0
2642	3	11	10	PTL	PTL	1215	1160	1115	1114	48	100	0.958	0
2642	3	12	10	PTL	PTL	1226	1182	1107	1106	49	119	1.551	0
2642	3	1	11	RS-FUC	RS-FUC	553	552	1166	1165	46	-613	-13.326	0
2642	3	2	11	RS-FUC	RS-FUC	567	526	1130	1085	160	-563	-3.494	0
2642	3	3	11	SAMB	SAMB	9807	9307	1108	1106	79	8699	103.81	0
2642	3	4	11	SAMB	SAMB	7624	7565	1106	1110	69	6518	93.551	0
2642	3	5	11	SBA	SBA	643	682	1076	1061	82	-433	-4.622	0
2642	3	6	11	SBA	SBA	511	569	1104	1106	48	-593	-11.187	0
2642	3	7	11	SJA	SJA	613	643	1081	1074	64	-468	-6.734	0
2642	3	8	11	SJA	SJA	644	683	1069	1057	81	-425	-4.617	0
2642	3	9	11	SNA-I	SNA-I	2138	2106	1115	1115	43	1023	23.047	0
2642	3	10	11	SNA-I	SNA-I	3277	3020	1104	1044	187	2173	10.567	0
2642	3	11	11	SNA-II	SNA-II	814	792	1130	1130	52	-316	-6.5	0
2642	3	12	11	SNA-II	SNA-II	926	909	1123	1120	49	-197	-4.306	0
2642	3	1	12	STL	STL	2428	2420	1147	1146	57	1281	22.351	0
2642	3	2	12	STL	STL	2330	2281	1143	1098	161	1187	7.348	0
2642	3	3	12	UDA	UDA	908	896	1096	1090	70	-188	-2.771	0
2642	3	4	12	UDA	UDA	865	846	1070	1082	522	-205	-0.452	0
2642	3	5	12	UEA I	UEA I	975	964	1091	1077	93	-116	-1.215	0
2642	3	6	12	UEA I	UEA I	1085	1085	1109	1122	362	-24	-0.102	0
2642	3	7	12	UEA-II	UEA-II	1070	1088	1115	1110	62	-45	-0.355	0
2642	3	8	12	UEA-II	UEA-II	1051	1088	1069	1059	71	-18	0.408	0
2642	3	9	12	VFA	VFA	1010	1012	1113	1115	44	-103	-2.341	0
2642	3	10	12	VFA	VFA	1033	1038	1127	1072	191	-94	-0.178	0
2642	3	11	12	VVA	VVA	8393	8298	1128	1135	79	7265	90.671	0
2642	3	12	12	VVA	VVA	7237	7060	1131	1132	59	6106	100.475	0
2642	3	1	13	WFA	WFA	521	616	1153	1154	52	-632	-10.346	0
2642	3	2	13	WFA	WFA	806	854	1146	1106	176	-340	-1.432	0
2642	3	3	13	WGA	WGA	1165	1148	1096	1088	66	69	0.909	0
2642	3	4	13	WGA	WGA	1210	1179	1065	1066	47	145	2.404	0
2642	3	5	13	NEG	NEG	85	282	1088	1066	109	-1003	-7.193	0
2642	3	6	13	NEG	NEG	90	338	1119	1122	46	-1029	-17.043	0
2642	3	7	13	NEG	NEG	162	396	1116	1107	65	-954	-10.938	0
2642	3	8	13	NEG	NEG	220	446	1102	1090	77	-882	-8.364	0
2642	3	9	13	POS2	POS2	6328	7119	1121	1117	76	5207	78.974	0
2642	3	10	13	POS2	POS2	7550	6875	1147	1096	182	6403	31.753	0
2642	3	11	13	POS1	POS1	21509	19169	1134	1132	71	20375	254.042	0
2642	3	12	13	POS1	POS1	22415	20548	1140	1142	63	21275	308.032	0
3108	4	1	1	POS1	POS1	18033	15205	1056	1051	108	16977	131.056	0
3108	4	2	1	POS1	POS1	19697	16777	1112	1102	178	18585	88.062	0
3108	4	3	1	POS2	POS2	2275	2913	1137	1149	81	1138	21.778	0
3108	4	4	1	POS2	POS2	2278	3103	1124	1121	106	1154	18.698	0
3108	4	5	1	NEG	NEG	163	571	1104	1098	107	-941	-4.925	0
3108	4	6	1	NEG	NEG	177	404	1027	1030	70	-850	-8.943	0
3108	4	7	1	NEG	NEG	135	440	1138	1129	84	-1003	-8.202	0
3108	4	8	1	NEG	NEG	94	367	1156	1158	84	-1062	-9.417	0
3108	4	9	1	AAA	AAA	560	660	1215	1207	85	-655	-6.435	0
3108	4	10	1	AAA	AAA	627	662	1247	1241	105	-620	-5.514	0
3108	4	11	1	AAL	AAL	1282	1396	1352	1351	133	-70	0.338	0
3108	4	12	1	AAL	AAL	1316	1452	1412	1391	98	-96	0.622	0
3108	4	1	2	ACG	ACG	1358	1299	1017	1025	107	341	2.561	0
3108	4	2	2	ACG	ACG	1342	1278	1039	1029	171	303	1.456	0
3108	4	3	2	ACL	ACL	321	399	1010	1030	112	-689	-5.634	0
3108	4	4	2	ACL	ACL	373	448	1026	1037	116	-653	-5.078	0
3108	4	5	2	ASA	ASA	6677	6801	999	1009	110	5678	52.655	0
3108	4	6	2	ASA	ASA	11466	9430	961	965	88	10505	96.193	0
3108	4	7	2	BANLEC	BANLEC	4841	4160	1081	1073	92	3760	33.554	0
3108	4	8	2	BANLEC	BANLEC	5416	4516	1165	1165	60	4251	55.85	0
3108	4	9	2	BC2L-A	BC2L-A	1170	1263	1199	1196	78	-29	0.859	0
3108	4	10	2	BC2L-A	BC2L-A	1349	1328	1235	1240	115	114	0.765	0
3108	4	11	2	BC2LCN	BC2LCN	1021	990	1319	1319	64	-298	-5.141	0
3108	4	12	2	BC2LCN	BC2LCN	1129	1084	1386	1370	98	-257	-2.918	0
3108	4	1	3	BPA; BPL	BPA; BPL	651	665	1093	1112	123	-442	-3.634	0
3108	4	2	3	BPA; BPL	BPA; BPL	1125	1093	1111	1095	173	14	-0.012	0
3108	4	3	3	CALSEPA	CALSEPA	3025	8061	1095	1109	92	1930	75.565	0
3108	4	4	3	CALSEPA	CALSEPA	4046	9313	1055	1120	668	2991	12.265	0
3108	4	5	3	CGL2	CGL2	1271	2235	1016	1025	115	255	10.522	0
3108	4	6	3	CGL2	CGL2	1597	2667	1005	1018	89	592	18.528	0
3108	4	7	3	CNL	CNL	742	794	1143	1141	122	-401	-2.844	0
3108	4	8	3	CNL	CNL	761	720	1167	1163	69	-406	-6.42	0
3108	4	9	3	Con A	Con A	1029	1045	1173	1168	79	-144	-1.557	0
3108	4	10	3	Con A	Con A	918	945	1226	1221	108	-308	-2.556	0
3108	4	11	3	DBA	DBA	905	998	1293	1297	79	-388	-3.785	0
3108	4	12	3	DBA	DBA	978	1058	1359	1343	102	-381	-2.794	0
3108	4	1	4	DISCOIDIN I	DISCOIDIN I	216	414	1112	1123	116	-896	-6.112	0
3108	4	2	4	DISCOIDIN I	DISCOIDIN I	268	369	1084	1067	170	-816	-4.106	0
3108	4	3	4	DISCOIDIN II	DISCOIDIN II	411	504	1132	1150	91	-721	-7.099	0
3108	4	4	4	DISCOIDIN II	DISCOIDIN II	409	506	1063	1077	106	-654	-5.387	0
3108	4	5	4	DSA	DSA	3956	3902	989	996	108	2967	26.907	0
3108	4	6	4	DSA	DSA	3613	3677	985	1005	103	2628	25.942	0
3108	4	7	4	ECA	ECA	393	412	1134	1144	113	-741	-6.478	0
3108	4	8	4	ECA	ECA	414	437	1177	1175	66	-763	-11.182	0
3108	4	9	4	EEL	EEL	386	534	1195	1203	95	-809	-7.042	0
3108	4	10	4	EEL	EEL	371	513	1213	1204	97	-842	-7.124	0
3108	4	11	4	F17AG	F17AG	524	591	1258	1266	99	-734	-6.818	0
3108	4	12	4	F17AG	F17AG	603	658	1322	1310	99	-719	-6.586	0
3108	4	1	5	GAL1	GAL1	105	341	1073	1085	103	-968	-7.223	0
3108	4	2	5	GAL1	GAL1	149	432	1047	1030	172	-898	-3.477	0
3108	4	3	5	GAL1-S	GAL1-S	167	317	1089	1109	102	-922	-7.765	0
3108	4	4	5	GAL1-S	GAL1-S	232	408	1036	1048	105	-804	-6.095	0
3108	4	5	5	GAL2	GAL2	418	448	998	1004	107	-580	-5.196	0
3108	4	6	5	GAL2	GAL2	485	489	1010	1027	98	-525	-5.49	0
3108	4	7	5	GAL3	GAL3	67	278	1138	1143	102	-1071	-8.48	0
3108	4	8	5	GAL3	GAL3	56	277	1155	1155	59	-1099	-14.881	0
3108	4	9	5	GAL3C-S	GAL3C-S	1312	1326	1166	1169	93	146	1.688	0
3108	4	10	5	GAL3C-S	GAL3C-S	1324	1342	1206	1190	93	118	1.634	0
3108	4	11	5	GAL7-S	GAL7-S	1090	1026	1234	1238	68	-144	-3.118	0
3108	4	12	5	GAL7-S	GAL7-S	1266	1168	1298	1289	131	-32	-0.924	0
3108	4	1	6	GAL9	GAL9	124	347	1043	1053	108	-919	-6.537	0
3108	4	2	6	GAL9	GAL9	212	398	1010	992	156	-798	-3.808	0
3108	4	3	6	GNA	GNA	21976	21839	1008	1023	89	20968	233.888	0
3108	4	4	6	GNA	GNA	19546	19498	934	933	80	18612	232.063	0
3108	4	5	6	GRFT	GRFT	1016	5398	874	874	105	142	43.086	0
3108	4	6	6	GRFT	GRFT	1330	5510	952	952	92	378	49.543	0
3108	4	7	6	GS-I;?GSL-I	GS-I;?GSL-I	1169	1089	1082	1080	87	87	0.103	0
3108	4	8	6	GS-I;?GSL-I	GS-I;?GSL-I	1260	1174	1137	1135	83	123	0.47	0
3108	4	9	6	GS-II; GSL-II	GS-II; GSL-II	432	523	1176	1177	83	-744	-7.88	0
3108	4	10	6	GS-II; GSL-II	GS-II; GSL-II	438	506	1177	1171	91	-739	-7.308	0
3108	4	11	6	HHA; HHL	HHA; HHL	15194	12292	1193	1192	68	14001	163.235	0
3108	4	12	6	HHA; HHL	HHA; HHL	14477	12427	1250	1241	86	13227	130.07	0
3108	4	1	7	Jacalin	Jacalin	603	633	1059	1058	84	-456	-5.06	0
3108	4	2	7	Jacalin	Jacalin	720	774	1039	1014	162	-319	-1.481	0
3108	4	3	7	LBA	LBA	287	327	1011	1019	80	-724	-8.65	0
3108	4	4	7	LBA	LBA	353	377	858	863	83	-505	-5.855	0
3108	4	5	7	LcH A	LcH A	658	694	728	719	70	-70	-0.357	0
3108	4	6	7	LcH A	LcH A	820	939	855	864	78	-35	0.962	0
3108	4	7	7	LEA	LEA	524	553	1004	995	87	-480	-5.08	0
3108	4	8	7	LEA	LEA	579	607	1089	1090	88	-510	-5.489	0
3108	4	9	7	LENTIL	LENTIL	1397	1432	1129	1125	71	268	4.324	0
3108	4	10	7	LENTIL	LENTIL	1504	1521	1125	1111	103	379	3.981	0
3108	4	11	7	Lotus	Lotus	747	710	1151	1148	76	-404	-5.763	0
3108	4	12	7	Lotus	Lotus	798	748	1141	1126	99	-343	-3.818	0
3108	4	1	8	LSL-N	LSL-N	1545	1482	1079	1082	100	466	4	0
3108	4	2	8	LSL-N	LSL-N	1525	1473	1042	1023	202	483	2.228	0
3108	4	3	8	MAA; MAL	MAA; MAL	4981	4189	931	937	85	4050	38.259	0
3108	4	4	8	MAA; MAL	MAA; MAL	5127	4442	852	856	90	4275	39.844	0
3108	4	5	8	MALECTIN	MALECTIN	614	602	868	860	87	-254	-2.966	0
3108	4	6	8	MALECTIN	MALECTIN	793	777	913	907	109	-120	-1.193	0
3108	4	7	8	MOA	MOA	331	420	977	907	226	-646	-2.155	0
3108	4	8	8	MOA	MOA	334	470	1046	1050	82	-712	-7.073	0
3108	4	9	8	MPL; MPA	MPL; MPA	1390	1314	1094	1095	123	296	1.78	0
3108	4	10	8	MPL; MPA	MPL; MPA	1368	1295	1079	1073	99	289	2.242	0
3108	4	11	8	NPA	NPA	8850	7848	1123	1117	85	7727	79.188	0
3108	4	12	8	NPA	NPA	9384	7895	1130	1116	102	8254	66.461	0
3108	4	1	9	ORYSATA	ORYSATA	971	1168	1081	1075	79	-110	1.177	0
3108	4	2	9	ORYSATA	ORYSATA	964	1128	992	962	138	-28	1.203	0
3108	4	3	9	PA-IIL	PA-IIL	284	488	842	839	78	-558	-4.5	0
3108	4	4	9	PA-IIL	PA-IIL	381	578	914	906	77	-533	-4.26	0
3108	4	5	9	PA-IL	PA-IL	254	272	961	953	72	-707	-9.458	0
3108	4	6	9	PA-IL	PA-IL	263	277	1007	1014	75	-744	-9.827	0
3108	4	7	9	PALa	PALa	646	2105	1060	1059	94	-414	11.128	0
3108	4	8	9	PALa	PALa	810	1542	1114	1127	95	-304	4.368	0
3108	4	9	9	PHA-E	PHA-E	1817	1819	1176	1178	94	641	6.819	0
3108	4	10	9	PHA-E	PHA-E	3143	3038	1200	1187	127	1943	14.575	0
3108	4	11	9	PHA-L	PHA-L	880	946	1186	1194	125	-306	-1.984	0
3108	4	12	9	PHA-L	PHA-L	1080	1102	1212	1205	85	-132	-1.212	0
3108	4	1	10	PHA-P	PHA-P	866	847	1001	986	120	-135	-1.158	0
3108	4	2	10	PHA-P	PHA-P	781	773	846	828	139	-65	-0.396	0
3108	4	3	10	PNA	PNA	412	473	944	908	119	-532	-3.655	0
3108	4	4	10	PNA	PNA	389	462	955	953	68	-566	-7.221	0
3108	4	5	10	PPL	PPL	845	770	1018	1014	91	-173	-2.681	0
3108	4	6	10	PPL	PPL	839	826	1062	1082	99	-223	-2.586	0
3108	4	7	10	PSA/PEA	PSA/PEA	1434	1451	1105	1105	89	329	3.888	0
3108	4	8	10	PSA/PEA	PSA/PEA	1550	1597	1176	1189	104	374	3.923	0
3108	4	9	10	PSL1A	PSL1A	1279	3666	1182	1192	111	97	22.288	0
3108	4	10	10	PSL1A	PSL1A	1703	4736	1239	1230	91	464	38.527	0
3108	4	11	10	PTL	PTL	1242	1193	1211	1214	81	31	-0.259	0
3108	4	12	10	PTL	PTL	1321	1287	1250	1242	91	71	0.495	0
3108	4	1	11	RS-FUC	RS-FUC	395	459	937	927	128	-542	-3.656	0
3108	4	2	11	RS-FUC	RS-FUC	565	545	1040	996	146	-475	-3.089	0
3108	4	3	11	SAMB	SAMB	12678	11556	1054	1060	94	11624	111.66	0
3108	4	4	11	SAMB	SAMB	10883	10127	953	961	101	9930	90.752	0
3108	4	5	11	SBA	SBA	299	398	1020	1011	76	-721	-8.066	0
3108	4	6	11	SBA	SBA	522	589	1065	1066	55	-543	-8.673	0
3108	4	7	11	SJA	SJA	632	642	1122	1121	79	-490	-6.063	0
3108	4	8	11	SJA	SJA	676	700	1174	1182	85	-498	-5.671	0
3108	4	9	11	SNA-I	SNA-I	2975	2861	1212	1210	90	1763	18.344	0
3108	4	10	11	SNA-I	SNA-I	4341	4056	1282	1265	125	3059	22.328	0
3108	4	11	11	SNA-II	SNA-II	685	702	1255	1263	122	-570	-4.598	0
3108	4	12	11	SNA-II	SNA-II	930	924	1281	1272	88	-351	-3.955	0
3108	4	1	12	STL	STL	2050	1992	1095	1085	78	955	11.628	0
3108	4	2	12	STL	STL	2056	2599	1067	1030	136	989	11.537	0
3108	4	3	12	UDA	UDA	742	738	1064	1065	74	-322	-4.419	0
3108	4	4	12	UDA	UDA	593	626	956	949	66	-363	-4.894	0
3108	4	5	12	UEA I	UEA I	1606	1597	1022	1021	96	584	6	0
3108	4	6	12	UEA I	UEA I	1913	1854	1062	1063	57	851	13.877	0
3108	4	7	12	UEA-II	UEA-II	1257	1245	1118	1126	92	139	1.293	0
3108	4	8	12	UEA-II	UEA-II	898	910	1162	1165	77	-264	-3.312	0
3108	4	9	12	VFA	VFA	1138	1163	1251	1243	125	-113	-0.64	0
3108	4	10	12	VFA	VFA	1164	1154	1324	1296	156	-160	-0.91	0
3108	4	11	12	VVA	VVA	8346	10417	1301	1305	92	7045	99.043	0
3108	4	12	12	VVA	VVA	7188	7160	1292	1281	96	5896	61.24	0
3108	4	1	13	WFA	WFA	516	607	1095	1085	77	-579	-6.208	0
3108	4	2	13	WFA	WFA	448	564	1081	1038	145	-633	-3.269	0
3108	4	3	13	WGA	WGA	1118	1099	1076	1076	45	42	0.511	0
3108	4	4	13	WGA	WGA	956	893	960	958	64	-4	-1.016	0
3108	4	5	13	NEG	NEG	70	226	1008	1000	78	-938	-9.923	0
3108	4	6	13	NEG	NEG	88	258	1071	1081	81	-983	-10.16	0
3108	4	7	13	NEG	NEG	172	372	1123	1135	108	-951	-7.065	0
3108	4	8	13	NEG	NEG	219	386	1190	1194	73	-971	-11.068	0
3108	4	9	13	POS2	POS2	6252	6463	1225	1181	185	5027	28.551	0
3108	4	10	13	POS2	POS2	7524	7120	1206	1179	440	6318	13.502	0
3108	4	11	13	POS1	POS1	27890	25549	1324	1323	65	26566	372.708	0
3108	4	12	13	POS1	POS1	23302	21552	1310	1299	94	21992	215.457	0
2339	5	1	1	POS1	POS1	16131	13248	1131	1131	47	15000	257.809	0
2339	5	2	1	POS1	POS1	18047	15346	1089	1044	162	16958	88.284	0
2339	5	3	1	POS2	POS2	2375	2941	1043	1041	101	1332	18.812	0
2339	5	4	1	POS2	POS2	2350	3404	1023	1020	49	1327	48.653	0
2339	5	5	1	NEG	NEG	101	411	973	965	79	-872	-7.013	0
2339	5	6	1	NEG	NEG	138	545	984	989	78	-846	-5.692	0
2339	5	7	1	NEG	NEG	68	428	1047	1042	69	-979	-8.899	0
2339	5	8	1	NEG	NEG	157	500	1049	1036	89	-892	-6.022	0
2339	5	9	1	AAA	AAA	489	543	1062	1063	46	-573	-11.304	0
2339	5	10	1	AAA	AAA	453	512	1060	1019	168	-607	-3.018	0
2339	5	11	1	AAL	AAL	669	753	1084	1087	67	-415	-4.985	0
2339	5	12	1	AAL	AAL	681	766	1106	1111	72	-425	-4.792	0
2339	5	1	2	ACG	ACG	1064	1049	1122	1126	93	-58	-0.828	0
2339	5	2	2	ACG	ACG	1006	1014	1086	1046	158	-80	-0.203	0
2339	5	3	2	ACL	ACL	286	370	1046	1041	66	-760	-10.167	0
2339	5	4	2	ACL	ACL	322	435	1019	1021	118	-697	-4.966	0
2339	5	5	2	ASA	ASA	13023	10504	962	958	66	12061	144.636	0
2339	5	6	2	ASA	ASA	14172	11892	953	956	70	13219	156.229	0
2339	5	7	2	BANLEC	BANLEC	5228	4676	1004	997	76	4224	48.408	0
2339	5	8	2	BANLEC	BANLEC	6066	5381	1017	1057	827	5049	5.229	0
2339	5	9	2	BC2L-A	BC2L-A	1667	1695	1050	1053	62	617	10.355	0
2339	5	10	2	BC2L-A	BC2L-A	1556	1672	1043	1004	156	513	4.282	0
2339	5	11	2	BC2LCN	BC2LCN	819	781	1050	1048	73	-231	-3.658	0
2339	5	12	2	BC2LCN	BC2LCN	736	724	1068	1068	49	-332	-7.02	0
2339	5	1	3	BPA; BPL	BPA; BPL	735	737	1106	1106	50	-371	-7.38	0
2339	5	2	3	BPA; BPL	BPA; BPL	774	822	1070	1024	164	-296	-1.232	0
2339	5	3	3	CALSEPA	CALSEPA	2465	5212	1012	1021	227	1453	18.463	0
2339	5	4	3	CALSEPA	CALSEPA	2745	6573	997	1001	202	1748	27.584	0
2339	5	5	3	CGL2	CGL2	1171	1836	922	914	70	249	13.171	0
2339	5	6	3	CGL2	CGL2	1173	1892	910	913	54	263	18.13	0
2339	5	7	3	CNL	CNL	588	600	973	968	64	-385	-5.75	0
2339	5	8	3	CNL	CNL	679	627	1006	994	116	-327	-3.164	0
2339	5	9	3	Con A	Con A	1071	1083	1063	1064	43	8	0.442	0
2339	5	10	3	Con A	Con A	1011	992	1053	1004	168	-42	-0.071	0
2339	5	11	3	DBA	DBA	960	948	1055	1053	53	-95	-1.981	0
2339	5	12	3	DBA	DBA	1015	1024	1066	1067	45	-51	-0.956	0
2339	5	1	4	DISCOIDIN I	DISCOIDIN I	195	447	1106	1114	127	-911	-5.252	0
2339	5	2	4	DISCOIDIN I	DISCOIDIN I	175	325	1078	1052	188	-903	-3.867	0
2339	5	3	4	DISCOIDIN II	DISCOIDIN II	347	404	1002	1023	130	-655	-4.762	0
2339	5	4	4	DISCOIDIN II	DISCOIDIN II	357	423	1000	1007	74	-643	-7.892	0
2339	5	5	4	DSA	DSA	3573	3477	890	885	70	2683	37.029	0
2339	5	6	4	DSA	DSA	3206	3232	894	928	501	2312	4.599	0
2339	5	7	4	ECA	ECA	391	416	1015	1019	81	-624	-7.444	0
2339	5	8	4	ECA	ECA	433	1597	999	989	78	-566	7.795	0
2339	5	9	4	EEL	EEL	871	891	1063	1066	67	-192	-2.612	0
2339	5	10	4	EEL	EEL	781	794	1034	978	179	-253	-1.028	0
2339	5	11	4	F17AG	F17AG	416	432	1005	956	151	-589	-3.47	0
2339	5	12	4	F17AG	F17AG	336	369	1043	1042	43	-707	-15.651	0
2339	5	1	5	GAL1	GAL1	89	340	1144	1150	123	-1055	-6.585	0
2339	5	2	5	GAL1	GAL1	121	339	1040	1023	194	-919	-3.526	0
2339	5	3	5	GAL1-S	GAL1-S	106	270	985	990	95	-879	-7.579	0
2339	5	4	5	GAL1-S	GAL1-S	199	359	945	953	77	-746	-7.714	0
2339	5	5	5	GAL2	GAL2	520	520	893	889	72	-373	-5.125	0
2339	5	6	5	GAL2	GAL2	535	513	908	912	57	-373	-7	0
2339	5	7	5	GAL3	GAL3	77	236	995	984	73	-918	-10.247	0
2339	5	8	5	GAL3	GAL3	109	194	997	986	72	-888	-11	0
2339	5	9	5	GAL3C-S	GAL3C-S	1128	1238	1036	1040	58	92	3.414	0
2339	5	10	5	GAL3C-S	GAL3C-S	1124	1094	1021	965	181	103	0.713	0
2339	5	11	5	GAL7-S	GAL7-S	719	661	1017	1014	61	-298	-5.787	0
2339	5	12	5	GAL7-S	GAL7-S	647	632	1021	1006	86	-374	-4.349	0
2339	5	1	6	GAL9	GAL9	148	268	999	1020	138	-851	-5.449	0
2339	5	2	6	GAL9	GAL9	127	265	945	910	195	-818	-3.308	0
2339	5	3	6	GNA	GNA	24500	25913	908	909	102	23592	245.137	0
2339	5	4	6	GNA	GNA	23930	24068	827	813	94	23103	247.394	0
2339	5	5	6	GRFT	GRFT	2655	6216	815	812	69	1840	78.319	0
2339	5	6	6	GRFT	GRFT	1050	6409	910	909	42	140	130.952	0
2339	5	7	6	GS-I;?GSL-I	GS-I;?GSL-I	755	723	960	960	105	-205	-2.257	0
2339	5	8	6	GS-I;?GSL-I	GS-I;?GSL-I	682	714	978	969	70	-296	-3.643	0
2339	5	9	6	GS-II; GSL-II	GS-II; GSL-II	502	539	1020	1021	46	-518	-10.478	0
2339	5	10	6	GS-II; GSL-II	GS-II; GSL-II	484	510	1025	1004	744	-541	-0.664	0
2339	5	11	6	HHA; HHL	HHA; HHL	15002	12443	1022	1027	83	13980	137.542	0
2339	5	12	6	HHA; HHL	HHA; HHL	17046	13769	976	965	77	16070	166.286	0
2339	5	1	7	Jacalin	Jacalin	541	569	831	791	158	-290	-1.405	0
2339	5	2	7	Jacalin	Jacalin	569	609	902	861	160	-333	-1.575	0
2339	5	3	7	LBA	LBA	308	384	782	786	147	-474	-2.735	0
2339	5	4	7	LBA	LBA	356	394	644	646	129	-288	-1.953	0
2339	5	5	7	LcH A	LcH A	540	565	730	685	129	-190	-0.93	0
2339	5	6	7	LcH A	LcH A	519	581	884	885	51	-365	-5.961	0
2339	5	7	7	LEA	LEA	480	520	934	927	61	-454	-6.672	0
2339	5	8	7	LEA	LEA	494	519	952	942	70	-458	-6.043	0
2339	5	9	7	LENTIL	LENTIL	964	947	990	992	44	-26	-1.023	0
2339	5	10	7	LENTIL	LENTIL	901	903	992	945	170	-91	-0.247	0
2339	5	11	7	Lotus	Lotus	654	636	969	965	79	-315	-4.165	0
2339	5	12	7	Lotus	Lotus	686	660	919	917	59	-233	-4.356	0
2339	5	1	8	LSL-N	LSL-N	1416	1444	956	955	67	460	7.299	0
2339	5	2	8	LSL-N	LSL-N	1326	1325	923	876	161	403	2.789	0
2339	5	3	8	MAA; MAL	MAA; MAL	3653	3235	851	783	173	2802	14.173	0
2339	5	4	8	MAA; MAL	MAA; MAL	3453	3055	833	824	88	2620	25.352	0
2339	5	5	8	MALECTIN	MALECTIN	601	601	814	808	212	-213	-0.976	0
2339	5	6	8	MALECTIN	MALECTIN	724	712	862	862	47	-138	-3.191	0
2339	5	7	8	MOA	MOA	371	461	904	900	71	-533	-6.183	0
2339	5	8	8	MOA	MOA	387	479	893	890	78	-506	-5.269	0
2339	5	9	8	MPL; MPA	MPL; MPA	1121	1053	934	934	53	187	2.245	0
2339	5	10	8	MPL; MPA	MPL; MPA	1238	1135	933	888	161	305	1.534	0
2339	5	11	8	NPA	NPA	9021	8128	965	967	62	8056	115.5	0
2339	5	12	8	NPA	NPA	10015	8533	957	950	65	9058	116.662	0
2339	5	1	9	ORYSATA	ORYSATA	779	766	995	1006	341	-216	-0.704	0
2339	5	2	9	ORYSATA	ORYSATA	768	818	952	915	141	-184	-0.688	0
2339	5	3	9	PA-IIL	PA-IIL	363	560	926	920	71	-563	-5.07	0
2339	5	4	9	PA-IIL	PA-IIL	439	593	920	919	47	-481	-6.936	0
2339	5	5	9	PA-IL	PA-IL	259	283	901	900	160	-642	-3.856	0
2339	5	6	9	PA-IL	PA-IL	251	286	943	941	40	-692	-16.375	0
2339	5	7	9	PALa	PALa	654	2789	980	978	79	-326	22.924	0
2339	5	8	9	PALa	PALa	696	2368	965	958	81	-269	17.407	0
2339	5	9	9	PHA-E	PHA-E	920	920	1010	1012	48	-90	-1.917	0
2339	5	10	9	PHA-E	PHA-E	2602	2574	1023	978	166	1579	9.614	0
2339	5	11	9	PHA-L	PHA-L	876	926	1050	1049	55	-174	-2.236	0
2339	5	12	9	PHA-L	PHA-L	958	984	1030	1033	47	-72	-1.043	0
2339	5	1	10	PHA-P	PHA-P	809	813	1025	1020	53	-216	-3.906	0
2339	5	2	10	PHA-P	PHA-P	839	835	1001	966	133	-162	-0.985	0
2339	5	3	10	PNA	PNA	438	487	959	955	63	-521	-7.429	0
2339	5	4	10	PNA	PNA	417	460	947	943	60	-530	-8.05	0
2339	5	5	10	PPL	PPL	801	748	963	954	81	-162	-2.543	0
2339	5	6	10	PPL	PPL	826	773	971	973	47	-145	-4.255	0
2339	5	7	10	PSA/PEA	PSA/PEA	1116	1078	992	992	111	124	0.775	0
2339	5	8	10	PSA/PEA	PSA/PEA	1089	1080	1004	1000	78	85	1.026	0
2339	5	9	10	PSL1A	PSL1A	1123	2487	1044	1049	64	79	22.469	0
2339	5	10	10	PSL1A	PSL1A	1589	3318	1041	998	162	548	14.321	0
2339	5	11	10	PTL	PTL	1139	1076	1061	1062	52	78	0.269	0
2339	5	12	10	PTL	PTL	1164	1108	1053	1053	47	111	1.17	0
2339	5	1	11	RS-FUC	RS-FUC	460	521	1052	1053	48	-592	-11.083	0
2339	5	2	11	RS-FUC	RS-FUC	510	481	1012	976	139	-502	-3.561	0
2339	5	3	11	SAMB	SAMB	13491	13210	993	995	82	12498	148.963	0
2339	5	4	11	SAMB	SAMB	11033	10281	967	998	196	10066	47.362	0
2339	5	5	11	SBA	SBA	376	449	989	975	75	-613	-7.013	0
2339	5	6	11	SBA	SBA	313	400	987	990	48	-674	-12.292	0
2339	5	7	11	SJA	SJA	567	545	1009	1005	68	-442	-6.765	0
2339	5	8	11	SJA	SJA	628	641	1019	1005	79	-391	-4.608	0
2339	5	9	11	SNA-I	SNA-I	2562	2486	1058	1059	47	1504	30.362	0
2339	5	10	11	SNA-I	SNA-I	4185	3799	1050	995	177	3135	15.842	0
2339	5	11	11	SNA-II	SNA-II	871	862	1081	1081	50	-210	-4.38	0
2339	5	12	11	SNA-II	SNA-II	799	774	1077	1094	302	-278	-1.06	0
2339	5	1	12	STL	STL	2180	2189	1056	1048	76	1124	15.013	0
2339	5	2	12	STL	STL	1786	1749	1034	997	137	752	5.489	0
2339	5	3	12	UDA	UDA	770	756	990	982	64	-220	-3.531	0
2339	5	4	12	UDA	UDA	691	693	959	965	224	-268	-1.214	0
2339	5	5	12	UEA I	UEA I	1009	1005	990	976	83	19	0.349	0
2339	5	6	12	UEA I	UEA I	1133	1121	1022	1024	47	111	2.064	0
2339	5	7	12	UEA-II	UEA-II	909	891	1024	1020	60	-115	-2.15	0
2339	5	8	12	UEA-II	UEA-II	974	991	1015	1006	65	-41	-0.231	0
2339	5	9	12	VFA	VFA	958	950	1068	1069	51	-110	-2.333	0
2339	5	10	12	VFA	VFA	983	973	1074	1023	186	-91	-0.269	0
2339	5	11	12	VVA	VVA	8133	7895	1091	1088	53	7042	128.434	0
2339	5	12	12	VVA	VVA	7986	7818	1093	1102	221	6893	30.389	0
2339	5	1	13	WFA	WFA	619	679	1094	1093	45	-475	-9.2	0
2339	5	2	13	WFA	WFA	703	717	1064	1024	142	-361	-2.162	0
2339	5	3	13	WGA	WGA	981	953	1018	1014	52	-37	-1.173	0
2339	5	4	13	WGA	WGA	904	875	959	959	49	-55	-1.714	0
2339	5	5	13	NEG	NEG	81	249	1010	994	85	-929	-8.765	0
2339	5	6	13	NEG	NEG	100	285	1060	1059	43	-960	-18	0
2339	5	7	13	NEG	NEG	146	289	1041	1035	61	-895	-12.23	0
2339	5	8	13	NEG	NEG	191	328	1012	1005	70	-821	-9.671	0
2339	5	9	13	POS2	POS2	6468	6791	1028	1029	54	5440	106.704	0
2339	5	10	13	POS2	POS2	7556	7301	1045	1001	183	6511	34.426	0
2339	5	11	13	POS1	POS1	21991	21385	1101	1100	99	20890	204.899	0
2339	5	12	13	POS1	POS1	22866	21132	1109	1111	68	21757	294.426	0
3109	6	1	1	POS1	POS1	15862	13102	1401	1392	95	14461	123.263	0
3109	6	2	1	POS1	POS1	17507	14749	1439	1388	191	16068	69.953	0
3109	6	3	1	POS2	POS2	2345	2924	1445	1453	89	900	16.528	0
3109	6	4	1	POS2	POS2	2334	3486	1453	1445	100	881	20.41	0
3109	6	5	1	NEG	NEG	161	660	1491	1467	123	-1330	-6.561	0
3109	6	6	1	NEG	NEG	209	892	1430	1429	69	-1221	-7.783	0
3109	6	7	1	NEG	NEG	189	650	1560	1551	88	-1371	-10.239	0
3109	6	8	1	NEG	NEG	271	933	1553	1554	65	-1282	-9.554	0
3109	6	9	1	AAA	AAA	636	736	1569	1555	96	-933	-8.531	0
3109	6	10	1	AAA	AAA	638	811	1601	1580	127	-963	-6.055	0
3109	6	11	1	AAL	AAL	914	1050	1632	1645	102	-718	-5.833	0
3109	6	12	1	AAL	AAL	970	1140	1716	1700	131	-746	-4.275	0
3109	6	1	2	ACG	ACG	1499	1501	1413	1403	98	86	1	0
3109	6	2	2	ACG	ACG	1453	1449	1410	1370	207	43	0.382	0
3109	6	3	2	ACL	ACL	460	558	1453	1452	94	-993	-9.511	0
3109	6	4	2	ACL	ACL	452	619	1411	1396	240	-959	-3.237	0
3109	6	5	2	ASA	ASA	9011	8940	1388	1373	136	7623	55.64	0
3109	6	6	2	ASA	ASA	10190	8981	1418	1418	71	8772	106.521	0
3109	6	7	2	BANLEC	BANLEC	6317	5684	1552	1532	113	4765	36.743	0
3109	6	8	2	BANLEC	BANLEC	6767	6257	1488	1445	221	5279	21.774	0
3109	6	9	2	BC2L-A	BC2L-A	1540	1798	1506	1414	267	34	1.438	0
3109	6	10	2	BC2L-A	BC2L-A	1731	1583	1579	1570	119	152	0.109	0
3109	6	11	2	BC2LCN	BC2LCN	1287	1221	1634	1650	93	-347	-4.613	0
3109	6	12	2	BC2LCN	BC2LCN	1197	1238	1669	1649	132	-472	-3.114	0
3109	6	1	3	BPA; BPL	BPA; BPL	832	883	1500	1507	169	-668	-3.692	0
3109	6	2	3	BPA; BPL	BPA; BPL	980	1002	1478	1451	227	-498	-1.978	0
3109	6	3	3	CALSEPA	CALSEPA	3535	7723	1463	1478	123	2072	50.772	0
3109	6	4	3	CALSEPA	CALSEPA	5212	8783	1378	1361	137	3834	54.175	0
3109	6	5	3	CGL2	CGL2	1878	2651	1309	1293	172	569	7.895	0
3109	6	6	3	CGL2	CGL2	1756	2724	1374	1384	111	382	12.072	0
3109	6	7	3	CNL	CNL	887	870	1490	1480	120	-603	-5.083	0
3109	6	8	3	CNL	CNL	1171	1044	1526	1525	91	-355	-5.286	0
3109	6	9	3	Con A	Con A	861	958	1530	1522	95	-669	-5.937	0
3109	6	10	3	Con A	Con A	1281	1300	1606	1588	157	-325	-1.834	0
3109	6	11	3	DBA	DBA	1002	1115	1631	1645	110	-629	-4.818	0
3109	6	12	3	DBA	DBA	1138	1200	1678	1664	128	-540	-3.625	0
3109	6	1	4	DISCOIDIN I	DISCOIDIN I	248	433	1570	1577	141	-1322	-8.113	0
3109	6	2	4	DISCOIDIN I	DISCOIDIN I	270	452	1516	1478	232	-1246	-4.422	0
3109	6	3	4	DISCOIDIN II	DISCOIDIN II	502	611	1525	1545	141	-1023	-6.624	0
3109	6	4	4	DISCOIDIN II	DISCOIDIN II	377	503	1385	1393	122	-1008	-7.295	0
3109	6	5	4	DSA	DSA	5649	5638	1343	1337	125	4306	34.408	0
3109	6	6	4	DSA	DSA	6068	5968	1325	1321	127	4743	36.591	0
3109	6	7	4	ECA	ECA	454	478	1362	1360	138	-908	-6.391	0
3109	6	8	4	ECA	ECA	458	507	1540	1540	86	-1082	-12.012	0
3109	6	9	4	EEL	EEL	385	595	1553	1535	98	-1168	-9.592	0
3109	6	10	4	EEL	EEL	449	631	1594	1583	156	-1145	-6.103	0
3109	6	11	4	F17AG	F17AG	616	655	1635	1637	76	-1019	-12.921	0
3109	6	12	4	F17AG	F17AG	647	688	1655	1650	134	-1008	-7.179	0
3109	6	1	5	GAL1	GAL1	108	516	1573	1577	138	-1465	-7.688	0
3109	6	2	5	GAL1	GAL1	136	614	1517	1482	222	-1381	-3.91	0
3109	6	3	5	GAL1-S	GAL1-S	216	411	1496	1515	137	-1280	-8.058	0
3109	6	4	5	GAL1-S	GAL1-S	283	552	1395	1407	130	-1112	-6.577	0
3109	6	5	5	GAL2	GAL2	585	598	1382	1389	154	-797	-5.136	0
3109	6	6	5	GAL2	GAL2	619	644	1343	1363	136	-724	-5.287	0
3109	6	7	5	GAL3	GAL3	76	226	1427	1423	101	-1351	-11.851	0
3109	6	8	5	GAL3	GAL3	66	241	1540	1537	99	-1474	-13.091	0
3109	6	9	5	GAL3C-S	GAL3C-S	1639	1643	1557	1557	106	82	0.811	0
3109	6	10	5	GAL3C-S	GAL3C-S	1669	1691	1556	1546	137	113	1.058	0
3109	6	11	5	GAL7-S	GAL7-S	1420	1343	1621	1622	68	-201	-4.103	0
3109	6	12	5	GAL7-S	GAL7-S	1372	1351	1648	1637	134	-276	-2.134	0
3109	6	1	6	GAL9	GAL9	169	465	1502	1509	138	-1333	-7.565	0
3109	6	2	6	GAL9	GAL9	302	494	1448	1423	274	-1146	-3.391	0
3109	6	3	6	GNA	GNA	25487	25877	1409	1416	138	24078	177.254	0
3109	6	4	6	GNA	GNA	23868	23905	1333	1352	131	22535	172.16	0
3109	6	5	6	GRFT	GRFT	2494	6196	1287	1291	149	1207	32.919	0
3109	6	6	6	GRFT	GRFT	3639	7008	1320	1327	85	2319	66.835	0
3109	6	7	6	GS-I;?GSL-I	GS-I;?GSL-I	1212	1183	1426	1416	100	-214	-2.33	0
3109	6	8	6	GS-I;?GSL-I	GS-I;?GSL-I	1500	1399	1501	1500	112	-1	-0.902	0
3109	6	9	6	GS-II; GSL-II	GS-II; GSL-II	370	559	1562	1556	141	-1192	-7.071	0
3109	6	10	6	GS-II; GSL-II	GS-II; GSL-II	868	976	1551	1545	122	-683	-4.664	0
3109	6	11	6	HHA; HHL	HHA; HHL	15447	12390	1600	1606	366	13847	29.464	0
3109	6	12	6	HHA; HHL	HHA; HHL	16089	12734	1610	1602	102	14479	109.137	0
3109	6	1	7	Jacalin	Jacalin	761	809	1458	1469	142	-697	-4.648	0
3109	6	2	7	Jacalin	Jacalin	797	845	1447	1397	384	-650	-1.437	0
3109	6	3	7	LBA	LBA	477	511	1392	1409	119	-915	-7.546	0
3109	6	4	7	LBA	LBA	459	518	1295	1298	104	-836	-7.5	0
3109	6	5	7	LcH A	LcH A	768	847	1170	1162	112	-402	-2.812	0
3109	6	6	7	LcH A	LcH A	898	958	1251	1252	71	-353	-4.141	0
3109	6	7	7	LEA	LEA	657	711	1394	1378	116	-737	-5.75	0
3109	6	8	7	LEA	LEA	772	766	1468	1470	135	-696	-5.215	0
3109	6	9	7	LENTIL	LENTIL	1532	1531	1543	1533	111	-11	-0.018	0
3109	6	10	7	LENTIL	LENTIL	1497	1537	1513	1494	136	-16	0.316	0
3109	6	11	7	Lotus	Lotus	957	947	1546	1547	77	-589	-7.792	0
3109	6	12	7	Lotus	Lotus	1039	1011	1538	1528	113	-499	-4.575	0
3109	6	1	8	LSL-N	LSL-N	1729	1714	1406	1413	137	323	2.197	0
3109	6	2	8	LSL-N	LSL-N	1883	1851	1385	1349	206	498	2.437	0
3109	6	3	8	MAA; MAL	MAA; MAL	5729	5127	1367	1382	95	4362	39.421	0
3109	6	4	8	MAA; MAL	MAA; MAL	5734	5155	1290	1289	91	4444	42.484	0
3109	6	5	8	MALECTIN	MALECTIN	804	780	1267	1258	123	-463	-3.886	0
3109	6	6	8	MALECTIN	MALECTIN	1036	999	1316	1330	95	-280	-3.484	0
3109	6	7	8	MOA	MOA	387	489	1376	1374	132	-989	-6.705	0
3109	6	8	8	MOA	MOA	407	528	1433	1428	122	-1026	-7.377	0
3109	6	9	8	MPL; MPA	MPL; MPA	1910	1808	1470	1443	147	440	2.483	0
3109	6	10	8	MPL; MPA	MPL; MPA	1970	1817	1509	1501	151	461	2.093	0
3109	6	11	8	NPA	NPA	8503	7720	1546	1534	108	6957	57.278	0
3109	6	12	8	NPA	NPA	10178	8670	1578	1561	111	8600	64.045	0
3109	6	1	9	ORYSATA	ORYSATA	1041	1101	1381	1370	98	-340	-2.745	0
3109	6	2	9	ORYSATA	ORYSATA	1049	1111	1393	1357	208	-344	-1.183	0
3109	6	3	9	PA-IIL	PA-IIL	367	594	1357	1359	95	-990	-8.053	0
3109	6	4	9	PA-IIL	PA-IIL	386	602	1260	1255	79	-874	-8.266	0
3109	6	5	9	PA-IL	PA-IL	379	427	1314	1303	112	-935	-7.821	0
3109	6	6	9	PA-IL	PA-IL	337	399	1359	1374	125	-1022	-7.8	0
3109	6	7	9	PALa	PALa	969	2264	1454	1464	145	-485	5.517	0
3109	6	8	9	PALa	PALa	965	2015	1504	1525	136	-539	3.603	0
3109	6	9	9	PHA-E	PHA-E	2419	2463	1549	1550	118	870	7.737	0
3109	6	10	9	PHA-E	PHA-E	3538	3446	1598	1585	148	1940	12.574	0
3109	6	11	9	PHA-L	PHA-L	661	729	1624	1624	79	-963	-11.329	0
3109	6	12	9	PHA-L	PHA-L	1247	1307	1655	1636	121	-408	-2.719	0
3109	6	1	10	PHA-P	PHA-P	1162	1145	1380	1377	110	-218	-2.109	0
3109	6	2	10	PHA-P	PHA-P	1130	1139	1349	1306	198	-219	-0.843	0
3109	6	3	10	PNA	PNA	541	623	1368	1372	94	-827	-7.968	0
3109	6	4	10	PNA	PNA	399	487	1271	1266	77	-872	-10.117	0
3109	6	5	10	PPL	PPL	944	943	1358	1359	142	-414	-2.93	0
3109	6	6	10	PPL	PPL	1058	1043	1397	1407	104	-339	-3.5	0
3109	6	7	10	PSA/PEA	PSA/PEA	1732	1694	1444	1442	116	288	2.172	0
3109	6	8	10	PSA/PEA	PSA/PEA	1786	1754	1547	1561	167	239	1.156	0
3109	6	9	10	PSL1A	PSL1A	1511	4171	1600	1605	135	-89	19.007	0
3109	6	10	10	PSL1A	PSL1A	1887	4814	1662	1639	140	225	22.679	0
3109	6	11	10	PTL	PTL	1629	1591	1617	1619	83	12	-0.337	0
3109	6	12	10	PTL	PTL	1721	1686	1646	1627	112	75	0.527	0
3109	6	1	11	RS-FUC	RS-FUC	623	584	1368	1360	87	-745	-8.92	0
3109	6	2	11	RS-FUC	RS-FUC	594	591	1355	1304	200	-761	-3.565	0
3109	6	3	11	SAMB	SAMB	14930	15259	1392	1397	79	13538	175.468	0
3109	6	4	11	SAMB	SAMB	12957	11956	1293	1293	108	11664	98.731	0
3109	6	5	11	SBA	SBA	537	601	1343	1333	108	-806	-6.778	0
3109	6	6	11	SBA	SBA	475	585	1399	1394	72	-924	-11.236	0
3109	6	7	11	SJA	SJA	878	881	1435	1425	110	-557	-4.945	0
3109	6	8	11	SJA	SJA	920	887	1541	1538	103	-621	-6.32	0
3109	6	9	11	SNA-I	SNA-I	4217	3917	1595	1583	123	2622	18.976	0
3109	6	10	11	SNA-I	SNA-I	5002	4751	1643	1618	159	3359	19.704	0
3109	6	11	11	SNA-II	SNA-II	1018	1027	1641	1636	96	-623	-6.344	0
3109	6	12	11	SNA-II	SNA-II	1236	1222	1666	1659	417	-430	-1.048	0
3109	6	1	12	STL	STL	3311	3194	1353	1347	95	1958	19.442	0
3109	6	2	12	STL	STL	2783	2616	1353	1300	191	1430	6.89	0
3109	6	3	12	UDA	UDA	922	943	1369	1374	86	-447	-5.012	0
3109	6	4	12	UDA	UDA	854	869	1282	1273	103	-428	-3.922	0
3109	6	5	12	UEA I	UEA I	1191	1164	1338	1322	103	-147	-1.534	0
3109	6	6	12	UEA I	UEA I	1297	1294	1401	1401	64	-104	-1.672	0
3109	6	7	12	UEA-II	UEA-II	1121	1116	1420	1413	77	-299	-3.857	0
3109	6	8	12	UEA-II	UEA-II	1232	1236	1502	1507	96	-270	-2.823	0
3109	6	9	12	VFA	VFA	1434	1470	1600	1603	164	-166	-0.811	0
3109	6	10	12	VFA	VFA	1334	1330	1633	1616	167	-299	-1.713	0
3109	6	11	12	VVA	VVA	9119	10947	1662	1660	90	7457	103.189	0
3109	6	12	12	VVA	VVA	6930	6776	1670	1649	111	5260	46.189	0
3109	6	1	13	WFA	WFA	445	585	1329	1316	83	-884	-8.807	0
3109	6	2	13	WFA	WFA	788	846	1365	1321	216	-577	-2.199	0
3109	6	3	13	WGA	WGA	1476	1432	1381	1380	78	95	0.667	0
3109	6	4	13	WGA	WGA	1413	1346	1322	1312	92	91	0.37	0
3109	6	5	13	NEG	NEG	95	322	1355	1348	122	-1260	-8.41	0
3109	6	6	13	NEG	NEG	119	401	1401	1401	77	-1282	-12.987	0
3109	6	7	13	NEG	NEG	197	430	1435	1425	90	-1238	-11.056	0
3109	6	8	13	NEG	NEG	321	421	1515	1516	69	-1194	-15.87	0
3109	6	9	13	POS2	POS2	6167	6798	1582	1573	105	4585	49.762	0
3109	6	10	13	POS2	POS2	7893	7725	1613	1593	139	6280	44.115	0
3109	6	11	13	POS1	POS1	28423	25387	1656	1652	109	26767	217.752	0
3109	6	12	13	POS1	POS1	23256	22045	1690	1666	113	21566	180.345	0
2480	7	1	1	POS1	POS1	15859	13127	884	882	50	14975	244.9	0
2480	7	2	1	POS1	POS1	18695	15227	804	765	128	17891	112.984	0
2480	7	3	1	POS2	POS2	2268	2777	811	807	50	1457	39.4	0
2480	7	4	1	POS2	POS2	2205	3199	807	803	48	1398	49.917	0
2480	7	5	1	NEG	NEG	111	358	796	788	71	-685	-6.056	0
2480	7	6	1	NEG	NEG	250	450	810	824	83	-560	-4.506	0
2480	7	7	1	NEG	NEG	125	355	803	809	66	-678	-6.879	0
2480	7	8	1	NEG	NEG	151	390	783	781	62	-632	-6.306	0
2480	7	9	1	AAA	AAA	358	418	804	809	58	-446	-6.741	0
2480	7	10	1	AAA	AAA	355	400	767	733	129	-412	-2.581	0
2480	7	11	1	AAL	AAL	529	573	778	776	57	-249	-3.561	0
2480	7	12	1	AAL	AAL	566	620	794	793	47	-228	-3.681	0
2480	7	1	2	ACG	ACG	1011	1028	878	879	46	133	3.239	0
2480	7	2	2	ACG	ACG	948	900	794	757	128	154	1.117	0
2480	7	3	2	ACL	ACL	262	325	761	745	81	-499	-5.185	0
2480	7	4	2	ACL	ACL	296	378	801	794	53	-505	-7.849	0
2480	7	5	2	ASA	ASA	8923	7563	780	775	53	8143	128.075	0
2480	7	6	2	ASA	ASA	8830	7511	779	780	40	8051	168.275	0
2480	7	7	2	BANLEC	BANLEC	1985	2244	777	772	49	1208	30.041	0
2480	7	8	2	BANLEC	BANLEC	3410	2732	783	780	71	2627	27.493	0
2480	7	9	2	BC2L-A	BC2L-A	907	1020	800	808	55	107	3.855	0
2480	7	10	2	BC2L-A	BC2L-A	959	1106	758	726	129	201	2.946	0
2480	7	11	2	BC2LCN	BC2LCN	704	666	781	782	40	-77	-2.9	0
2480	7	12	2	BC2LCN	BC2LCN	726	691	793	796	56	-67	-1.875	0
2480	7	1	3	BPA; BPL	BPA; BPL	613	608	859	860	39	-246	-6.462	0
2480	7	2	3	BPA; BPL	BPA; BPL	687	678	832	797	124	-145	-0.96	0
2480	7	3	3	CALSEPA	CALSEPA	2176	4133	751	760	131	1425	25.748	0
2480	7	4	3	CALSEPA	CALSEPA	3294	4837	798	802	105	2496	38.429	0
2480	7	5	3	CGL2	CGL2	1546	1539	773	773	53	773	14.453	0
2480	7	6	3	CGL2	CGL2	1120	1646	764	765	37	356	23.811	0
2480	7	7	3	CNL	CNL	490	504	760	753	50	-270	-4.98	0
2480	7	8	3	CNL	CNL	612	545	776	765	62	-164	-3.548	0
2480	7	9	3	Con A	Con A	911	903	810	812	42	101	2.167	0
2480	7	10	3	Con A	Con A	889	880	775	737	132	114	1.083	0
2480	7	11	3	DBA	DBA	814	844	792	793	48	22	1.063	0
2480	7	12	3	DBA	DBA	828	865	806	808	48	22	1.188	0
2480	7	1	4	DISCOIDIN I	DISCOIDIN I	210	343	853	859	62	-643	-8.323	0
2480	7	2	4	DISCOIDIN I	DISCOIDIN I	195	316	803	758	142	-608	-3.113	0
2480	7	3	4	DISCOIDIN II	DISCOIDIN II	316	360	795	797	100	-479	-4.37	0
2480	7	4	4	DISCOIDIN II	DISCOIDIN II	326	380	764	767	67	-438	-5.776	0
2480	7	5	4	DSA	DSA	2573	2466	741	734	55	1832	31.491	0
2480	7	6	4	DSA	DSA	2524	2372	756	757	35	1768	46.143	0
2480	7	7	4	ECA	ECA	381	422	760	763	134	-379	-2.545	0
2480	7	8	4	ECA	ECA	389	424	763	755	53	-374	-6.245	0
2480	7	9	4	EEL	EEL	1555	1489	796	797	44	759	15.727	0
2480	7	10	4	EEL	EEL	1506	1442	782	741	131	724	5.351	0
2480	7	11	4	F17AG	F17AG	309	376	791	799	254	-482	-1.665	0
2480	7	12	4	F17AG	F17AG	379	400	799	780	92	-420	-4.13	0
2480	7	1	5	GAL1	GAL1	86	312	868	879	64	-782	-8.859	0
2480	7	2	5	GAL1	GAL1	105	330	823	789	123	-718	-3.732	0
2480	7	3	5	GAL1-S	GAL1-S	132	252	800	793	49	-668	-11.041	0
2480	7	4	5	GAL1-S	GAL1-S	172	329	780	781	64	-608	-7.062	0
2480	7	5	5	GAL2	GAL2	489	475	747	743	62	-258	-4.323	0
2480	7	6	5	GAL2	GAL2	532	525	758	763	55	-226	-4.327	0
2480	7	7	5	GAL3	GAL3	64	121	775	768	60	-711	-10.783	0
2480	7	8	5	GAL3	GAL3	61	131	766	761	58	-705	-10.862	0
2480	7	9	5	GAL3C-S	GAL3C-S	837	840	817	820	52	20	0.385	0
2480	7	10	5	GAL3C-S	GAL3C-S	874	838	784	746	131	90	0.702	0
2480	7	11	5	GAL7-S	GAL7-S	547	490	794	794	41	-247	-7.415	0
2480	7	12	5	GAL7-S	GAL7-S	474	465	803	802	37	-329	-9.108	0
2480	7	1	6	GAL9	GAL9	126	267	823	828	75	-697	-7.48	0
2480	7	2	6	GAL9	GAL9	193	323	821	786	125	-628	-3.704	0
2480	7	3	6	GNA	GNA	14591	15258	757	751	65	13834	223.185	0
2480	7	4	6	GNA	GNA	13273	13709	735	723	79	12538	164.38	0
2480	7	5	6	GRFT	GRFT	1556	3841	729	726	56	827	55.625	0
2480	7	6	6	GRFT	GRFT	2933	3475	726	711	86	2207	32.14	0
2480	7	7	6	GS-I;?GSL-I	GS-I;?GSL-I	611	597	778	773	50	-167	-3.52	0
2480	7	8	6	GS-I;?GSL-I	GS-I;?GSL-I	635	634	777	768	57	-142	-2.351	0
2480	7	9	6	GS-II; GSL-II	GS-II; GSL-II	419	452	794	796	36	-375	-9.556	0
2480	7	10	6	GS-II; GSL-II	GS-II; GSL-II	429	462	792	760	127	-363	-2.346	0
2480	7	11	6	HHA; HHL	HHA; HHL	9336	7526	783	785	45	8553	149.8	0
2480	7	12	6	HHA; HHL	HHA; HHL	9693	8189	792	795	42	8901	176.048	0
2480	7	1	7	Jacalin	Jacalin	604	624	832	838	103	-228	-2.078	0
2480	7	2	7	Jacalin	Jacalin	665	684	814	782	128	-149	-0.766	0
2480	7	3	7	LBA	LBA	327	343	776	773	55	-449	-7.818	0
2480	7	4	7	LBA	LBA	366	394	739	729	61	-373	-5.492	0
2480	7	5	7	LcH A	LcH A	607	626	694	689	84	-87	-0.75	0
2480	7	6	7	LcH A	LcH A	648	680	737	739	39	-89	-1.513	0
2480	7	7	7	LEA	LEA	460	490	771	766	51	-311	-5.412	0
2480	7	8	7	LEA	LEA	438	456	765	756	106	-327	-2.83	0
2480	7	9	7	LENTIL	LENTIL	811	838	784	787	37	27	1.378	0
2480	7	10	7	LENTIL	LENTIL	777	793	778	736	136	-1	0.419	0
2480	7	11	7	Lotus	Lotus	467	458	780	773	66	-313	-4.773	0
2480	7	12	7	Lotus	Lotus	502	471	768	768	43	-266	-6.907	0
2480	7	1	8	LSL-N	LSL-N	1211	1164	847	856	72	364	4.278	0
2480	7	2	8	LSL-N	LSL-N	1105	1080	801	776	121	304	2.512	0
2480	7	3	8	MAA; MAL	MAA; MAL	3132	2802	792	810	744	2340	2.677	0
2480	7	4	8	MAA; MAL	MAA; MAL	3220	2928	760	756	51	2460	42.588	0
2480	7	5	8	MALECTIN	MALECTIN	556	559	726	722	96	-170	-1.698	0
2480	7	6	8	MALECTIN	MALECTIN	563	558	731	733	39	-168	-4.487	0
2480	7	7	8	MOA	MOA	370	431	740	741	114	-370	-2.719	0
2480	7	8	8	MOA	MOA	387	442	739	734	96	-352	-3.042	0
2480	7	9	8	MPL; MPA	MPL; MPA	1083	1018	765	766	34	318	7.412	0
2480	7	10	8	MPL; MPA	MPL; MPA	1087	1028	764	723	139	323	2.194	0
2480	7	11	8	NPA	NPA	6192	5382	711	669	159	5481	29.642	0
2480	7	12	8	NPA	NPA	6150	5126	773	771	41	5377	106.22	0
2480	7	1	9	ORYSATA	ORYSATA	691	655	841	847	76	-150	-2.526	0
2480	7	2	9	ORYSATA	ORYSATA	712	679	779	754	122	-67	-0.615	0
2480	7	3	9	PA-IIL	PA-IIL	262	415	764	762	65	-502	-5.338	0
2480	7	4	9	PA-IIL	PA-IIL	320	456	758	734	102	-438	-2.725	0
2480	7	5	9	PA-IL	PA-IL	267	270	742	739	64	-475	-7.328	0
2480	7	6	9	PA-IL	PA-IL	238	249	756	759	41	-518	-12.439	0
2480	7	7	9	PALa	PALa	502	2332	755	759	131	-253	12.008	0
2480	7	8	9	PALa	PALa	721	1797	751	774	734	-30	1.394	0
2480	7	9	9	PHA-E	PHA-E	1803	1711	773	781	253	1030	3.676	0
2480	7	10	9	PHA-E	PHA-E	2915	2885	779	741	131	2136	16.366	0
2480	7	11	9	PHA-L	PHA-L	815	830	804	803	42	11	0.643	0
2480	7	12	9	PHA-L	PHA-L	917	954	810	819	65	107	2.077	0
2480	7	1	10	PHA-P	PHA-P	705	659	836	837	42	-131	-4.238	0
2480	7	2	10	PHA-P	PHA-P	649	654	772	740	124	-123	-0.694	0
2480	7	3	10	PNA	PNA	393	417	767	759	58	-374	-5.897	0
2480	7	4	10	PNA	PNA	383	413	773	762	63	-390	-5.54	0
2480	7	5	10	PPL	PPL	648	575	752	740	68	-104	-2.426	0
2480	7	6	10	PPL	PPL	708	640	753	742	60	-45	-1.7	0
2480	7	7	10	PSA/PEA	PSA/PEA	744	765	768	763	47	-24	0.043	0
2480	7	8	10	PSA/PEA	PSA/PEA	763	761	771	765	56	-8	-0.071	0
2480	7	9	10	PSL1A	PSL1A	962	2163	783	807	470	179	2.885	0
2480	7	10	10	PSL1A	PSL1A	1199	2300	781	752	118	418	13.119	0
2480	7	11	10	PTL	PTL	926	882	817	817	38	109	1.711	0
2480	7	12	10	PTL	PTL	882	857	811	812	40	71	1.125	0
2480	7	1	11	RS-FUC	RS-FUC	425	420	841	842	46	-416	-9.174	0
2480	7	2	11	RS-FUC	RS-FUC	399	387	792	751	131	-393	-2.779	0
2480	7	3	11	SAMB	SAMB	9423	8650	769	791	195	8654	40.303	0
2480	7	4	11	SAMB	SAMB	11827	11615	782	796	129	11045	83.868	0
2480	7	5	11	SBA	SBA	329	368	779	772	58	-450	-6.966	0
2480	7	6	11	SBA	SBA	346	385	793	793	36	-447	-11.333	0
2480	7	7	11	SJA	SJA	444	452	780	774	47	-336	-6.851	0
2480	7	8	11	SJA	SJA	462	478	783	773	66	-321	-4.47	0
2480	7	9	11	SNA-I	SNA-I	2151	2023	806	808	38	1345	31.974	0
2480	7	10	11	SNA-I	SNA-I	3265	2981	784	747	129	2481	17.318	0
2480	7	11	11	SNA-II	SNA-II	721	694	834	832	39	-113	-3.538	0
2480	7	12	11	SNA-II	SNA-II	628	619	811	810	42	-183	-4.548	0
2480	7	1	12	STL	STL	1806	1761	835	835	39	971	23.744	0
2480	7	2	12	STL	STL	1717	1658	814	780	124	903	7.081	0
2480	7	3	12	UDA	UDA	612	600	770	762	53	-158	-3.057	0
2480	7	4	12	UDA	UDA	608	598	768	768	50	-160	-3.4	0
2480	7	5	12	UEA I	UEA I	743	734	790	788	152	-47	-0.355	0
2480	7	6	12	UEA I	UEA I	747	738	800	803	36	-53	-1.806	0
2480	7	7	12	UEA-II	UEA-II	519	530	796	793	42	-277	-6.262	0
2480	7	8	12	UEA-II	UEA-II	761	759	794	785	58	-33	-0.448	0
2480	7	9	12	VFA	VFA	745	736	816	816	39	-71	-2.051	0
2480	7	10	12	VFA	VFA	715	721	799	760	136	-84	-0.287	0
2480	7	11	12	VVA	VVA	8460	7893	827	836	255	7633	27.675	0
2480	7	12	12	VVA	VVA	7263	6880	822	824	46	6441	131.652	0
2480	7	1	13	WFA	WFA	377	449	852	853	37	-475	-10.919	0
2480	7	2	13	WFA	WFA	433	487	820	787	130	-387	-2.308	0
2480	7	3	13	WGA	WGA	728	681	789	785	46	-61	-2.261	0
2480	7	4	13	WGA	WGA	863	835	776	776	36	87	1.639	0
2480	7	5	13	NEG	NEG	60	187	796	782	70	-736	-8.5	0
2480	7	6	13	NEG	NEG	100	247	823	824	40	-723	-14.425	0
2480	7	7	13	NEG	NEG	216	373	795	792	135	-579	-3.104	0
2480	7	8	13	NEG	NEG	199	323	788	780	60	-589	-7.617	0
2480	7	9	13	POS2	POS2	7095	7063	800	805	46	6295	136.043	0
2480	7	10	13	POS2	POS2	8450	7913	822	795	129	7628	55.178	0
2480	7	11	13	POS1	POS1	22190	19501	832	835	56	21358	333.321	0
2480	7	12	13	POS1	POS1	23210	21509	838	838	39	22372	530.026	0
3110	8	1	1	POS1	POS1	14810	12578	849	843	65	13961	180.538	0
3110	8	2	1	POS1	POS1	18107	14782	792	772	95	17315	147.474	0
3110	8	3	1	POS2	POS2	2385	2779	800	803	56	1585	35.286	0
3110	8	4	1	POS2	POS2	2291	3194	778	777	50	1513	48.34	0
3110	8	5	1	NEG	NEG	75	327	805	795	67	-730	-6.985	0
3110	8	6	1	NEG	NEG	72	280	778	778	46	-706	-10.826	0
3110	8	7	1	NEG	NEG	122	317	884	879	72	-762	-7.806	0
3110	8	8	1	NEG	NEG	183	401	912	911	52	-729	-9.808	0
3110	8	9	1	AAA	AAA	333	408	936	934	56	-603	-9.393	0
3110	8	10	1	AAA	AAA	341	404	982	970	77	-641	-7.351	0
3110	8	11	1	AAL	AAL	712	773	1023	1025	49	-311	-5.143	0
3110	8	12	1	AAL	AAL	703	771	1051	1040	73	-348	-3.685	0
3110	8	1	2	ACG	ACG	1012	973	834	832	63	178	2.238	0
3110	8	2	2	ACG	ACG	958	938	794	772	97	164	1.711	0
3110	8	3	2	ACL	ACL	239	297	801	798	57	-562	-8.789	0
3110	8	4	2	ACL	ACL	244	313	777	779	46	-533	-10.13	0
3110	8	5	2	ASA	ASA	13144	10865	765	757	71	12379	142.366	0
3110	8	6	2	ASA	ASA	12738	10932	784	784	56	11954	181.214	0
3110	8	7	2	BANLEC	BANLEC	7034	6366	865	859	75	6169	73.427	0
3110	8	8	2	BANLEC	BANLEC	8314	7856	921	924	59	7393	117.492	0
3110	8	9	2	BC2L-A	BC2L-A	2016	2051	931	929	58	1085	19.345	0
3110	8	10	2	BC2L-A	BC2L-A	2119	1834	985	977	99	1134	8.657	0
3110	8	11	2	BC2LCN	BC2LCN	713	702	1009	1007	57	-296	-5.351	0
3110	8	12	2	BC2LCN	BC2LCN	719	733	1034	1016	100	-315	-2.83	0
3110	8	1	3	BPA; BPL	BPA; BPL	479	485	830	827	58	-351	-5.897	0
3110	8	2	3	BPA; BPL	BPA; BPL	729	733	796	770	108	-67	-0.343	0
3110	8	3	3	CALSEPA	CALSEPA	4122	8058	779	783	55	3343	132.273	0
3110	8	4	3	CALSEPA	CALSEPA	4210	8866	763	756	82	3447	98.902	0
3110	8	5	3	CGL2	CGL2	1023	2620	732	725	65	291	29.154	0
3110	8	6	3	CGL2	CGL2	1378	2253	796	801	63	582	23.048	0
3110	8	7	3	CNL	CNL	512	480	859	850	63	-347	-5.873	0
3110	8	8	3	CNL	CNL	601	538	915	919	149	-314	-2.557	0
3110	8	9	3	Con A	Con A	1133	1134	933	927	59	200	3.508	0
3110	8	10	3	Con A	Con A	1013	988	991	984	100	22	0.04	0
3110	8	11	3	DBA	DBA	922	891	999	1000	49	-77	-2.224	0
3110	8	12	3	DBA	DBA	825	917	1028	1021	70	-203	-1.486	0
3110	8	1	4	DISCOIDIN I	DISCOIDIN I	157	348	849	850	74	-692	-6.784	0
3110	8	2	4	DISCOIDIN I	DISCOIDIN I	161	324	823	807	129	-662	-3.744	0
3110	8	3	4	DISCOIDIN II	DISCOIDIN II	380	433	773	771	70	-393	-4.829	0
3110	8	4	4	DISCOIDIN II	DISCOIDIN II	278	351	738	706	129	-460	-2.752	0
3110	8	5	4	DSA	DSA	3525	3396	708	708	72	2817	37.333	0
3110	8	6	4	DSA	DSA	3593	3524	726	734	74	2867	37.703	0
3110	8	7	4	ECA	ECA	363	380	861	854	74	-498	-6.405	0
3110	8	8	4	ECA	ECA	364	383	933	929	93	-569	-5.871	0
3110	8	9	4	EEL	EEL	488	532	943	945	82	-455	-5.037	0
3110	8	10	4	EEL	EEL	484	526	974	969	95	-490	-4.663	0
3110	8	11	4	F17AG	F17AG	403	458	992	991	46	-589	-11.587	0
3110	8	12	4	F17AG	F17AG	416	489	1013	1004	70	-597	-7.357	0
3110	8	1	5	GAL1	GAL1	87	269	860	871	89	-773	-6.764	0
3110	8	2	5	GAL1	GAL1	125	319	828	804	126	-703	-3.849	0
3110	8	3	5	GAL1-S	GAL1-S	168	263	779	781	67	-611	-7.731	0
3110	8	4	5	GAL1-S	GAL1-S	169	267	731	731	61	-562	-7.607	0
3110	8	5	5	GAL2	GAL2	302	307	669	672	68	-367	-5.368	0
3110	8	6	5	GAL2	GAL2	330	341	714	721	70	-384	-5.429	0
3110	8	7	5	GAL3	GAL3	68	226	845	846	79	-777	-7.848	0
3110	8	8	5	GAL3	GAL3	80	258	904	902	74	-824	-8.703	0
3110	8	9	5	GAL3C-S	GAL3C-S	973	989	932	931	73	41	0.795	0
3110	8	10	5	GAL3C-S	GAL3C-S	967	971	941	930	75	26	0.547	0
3110	8	11	5	GAL7-S	GAL7-S	727	694	983	982	57	-256	-5.053	0
3110	8	12	5	GAL7-S	GAL7-S	854	790	969	937	125	-115	-1.176	0
3110	8	1	6	GAL9	GAL9	116	231	839	840	77	-723	-7.909	0
3110	8	2	6	GAL9	GAL9	153	276	812	794	130	-659	-3.985	0
3110	8	3	6	GNA	GNA	30980	31664	758	762	84	30222	367.881	0
3110	8	4	6	GNA	GNA	30032	29824	681	684	56	29351	520.357	0
3110	8	5	6	GRFT	GRFT	6417	8478	608	602	66	5809	119.333	0
3110	8	6	6	GRFT	GRFT	7168	9018	692	697	73	6476	113.986	0
3110	8	7	6	GS-I;?GSL-I	GS-I;?GSL-I	784	738	825	824	75	-41	-1.147	0
3110	8	8	6	GS-I;?GSL-I	GS-I;?GSL-I	623	614	877	876	68	-254	-3.853	0
3110	8	9	6	GS-II; GSL-II	GS-II; GSL-II	629	635	929	930	75	-300	-3.933	0
3110	8	10	6	GS-II; GSL-II	GS-II; GSL-II	615	621	916	910	74	-301	-3.905	0
3110	8	11	6	HHA; HHL	HHA; HHL	17734	14260	950	953	52	16784	255.904	0
3110	8	12	6	HHA; HHL	HHA; HHL	17846	14349	908	893	77	16938	174.753	0
3110	8	1	7	Jacalin	Jacalin	580	616	885	889	90	-305	-3.033	0
3110	8	2	7	Jacalin	Jacalin	552	582	882	857	136	-330	-2.022	0
3110	8	3	7	LBA	LBA	240	247	811	816	85	-571	-6.694	0
3110	8	4	7	LBA	LBA	340	363	665	665	54	-325	-5.593	0
3110	8	5	7	LcH A	LcH A	574	623	524	521	60	50	1.7	0
3110	8	6	7	LcH A	LcH A	642	738	644	644	50	-2	1.88	0
3110	8	7	7	LEA	LEA	365	412	775	771	82	-410	-4.378	0
3110	8	8	7	LEA	LEA	374	431	842	845	79	-468	-5.241	0
3110	8	9	7	LENTIL	LENTIL	1157	1179	885	883	76	272	3.895	0
3110	8	10	7	LENTIL	LENTIL	1119	1182	871	862	76	248	4.211	0
3110	8	11	7	Lotus	Lotus	515	525	893	890	55	-378	-6.636	0
3110	8	12	7	Lotus	Lotus	485	494	806	795	119	-321	-2.529	0
3110	8	1	8	LSL-N	LSL-N	1228	1180	905	912	101	323	2.653	0
3110	8	2	8	LSL-N	LSL-N	1225	1165	852	834	130	373	2.546	0
3110	8	3	8	MAA; MAL	MAA; MAL	4597	4086	835	836	63	3762	51.587	0
3110	8	4	8	MAA; MAL	MAA; MAL	4243	3830	705	713	62	3538	50.274	0
3110	8	5	8	MALECTIN	MALECTIN	477	459	677	672	80	-200	-2.662	0
3110	8	6	8	MALECTIN	MALECTIN	533	529	727	730	64	-194	-3.141	0
3110	8	7	8	MOA	MOA	309	398	780	783	86	-471	-4.477	0
3110	8	8	8	MOA	MOA	308	436	876	883	92	-568	-4.859	0
3110	8	9	8	MPL; MPA	MPL; MPA	1077	1018	884	886	77	193	1.714	0
3110	8	10	8	MPL; MPA	MPL; MPA	1087	1026	887	874	84	200	1.81	0
3110	8	11	8	NPA	NPA	10281	9058	923	915	66	9358	123.379	0
3110	8	12	8	NPA	NPA	10021	8643	926	915	88	9095	87.818	0
3110	8	1	9	ORYSATA	ORYSATA	898	1169	962	968	88	-64	2.284	0
3110	8	2	9	ORYSATA	ORYSATA	873	990	901	879	136	-28	0.816	0
3110	8	3	9	PA-IIL	PA-IIL	527	551	873	875	73	-346	-4.438	0
3110	8	4	9	PA-IIL	PA-IIL	469	517	738	785	1088	-269	-0.246	0
3110	8	5	9	PA-IL	PA-IL	276	295	746	743	70	-470	-6.4	0
3110	8	6	9	PA-IL	PA-IL	232	272	808	817	70	-576	-7.786	0
3110	8	7	9	PALa	PALa	886	2679	859	866	88	27	20.602	0
3110	8	8	9	PALa	PALa	722	1678	964	974	92	-242	7.652	0
3110	8	9	9	PHA-E	PHA-E	2867	2822	987	987	71	1880	25.845	0
3110	8	10	9	PHA-E	PHA-E	3399	3312	1004	1000	100	2395	23.12	0
3110	8	11	9	PHA-L	PHA-L	951	978	986	987	50	-35	-0.18	0
3110	8	12	9	PHA-L	PHA-L	1206	1279	1014	1010	74	192	3.635	0
3110	8	1	10	PHA-P	PHA-P	659	666	938	944	94	-279	-2.957	0
3110	8	2	10	PHA-P	PHA-P	687	697	885	866	148	-198	-1.142	0
3110	8	3	10	PNA	PNA	362	409	871	871	75	-509	-6.16	0
3110	8	4	10	PNA	PNA	300	323	780	780	57	-480	-8.018	0
3110	8	5	10	PPL	PPL	597	558	790	789	70	-193	-3.3	0
3110	8	6	10	PPL	PPL	672	630	849	853	58	-177	-3.845	0
3110	8	7	10	PSA/PEA	PSA/PEA	1008	1142	892	891	69	116	3.638	0
3110	8	8	10	PSA/PEA	PSA/PEA	1339	1386	991	998	97	348	4	0
3110	8	9	10	PSL1A	PSL1A	1085	3657	1018	1018	79	67	33.405	0
3110	8	10	10	PSL1A	PSL1A	1507	4959	1024	1014	88	483	44.83	0
3110	8	11	10	PTL	PTL	1016	1007	1020	1021	84	-4	-0.167	0
3110	8	12	10	PTL	PTL	1080	1072	1044	1032	79	36	0.506	0
3110	8	1	11	RS-FUC	RS-FUC	575	538	936	931	110	-361	-3.573	0
3110	8	2	11	RS-FUC	RS-FUC	545	498	893	855	167	-348	-2.138	0
3110	8	3	11	SAMB	SAMB	13263	16069	878	878	94	12385	161.606	0
3110	8	4	11	SAMB	SAMB	14719	15553	806	808	77	13913	191.494	0
3110	8	5	11	SBA	SBA	354	393	817	813	75	-463	-5.6	0
3110	8	6	11	SBA	SBA	287	356	870	874	62	-583	-8.355	0
3110	8	7	11	SJA	SJA	499	517	910	909	76	-411	-5.158	0
3110	8	8	11	SJA	SJA	602	611	973	981	87	-371	-4.253	0
3110	8	9	11	SNA-I	SNA-I	2593	2473	1013	1017	90	1580	16.178	0
3110	8	10	11	SNA-I	SNA-I	4394	4077	1027	1016	95	3367	32.221	0
3110	8	11	11	SNA-II	SNA-II	715	750	1049	1050	49	-334	-6.122	0
3110	8	12	11	SNA-II	SNA-II	762	762	1060	1043	84	-298	-3.345	0
3110	8	1	12	STL	STL	2828	2874	894	892	73	1934	27.151	0
3110	8	2	12	STL	STL	2380	2270	873	851	119	1507	11.924	0
3110	8	3	12	UDA	UDA	476	517	861	869	124	-385	-2.839	0
3110	8	4	12	UDA	UDA	456	477	794	790	57	-338	-5.491	0
3110	8	5	12	UEA I	UEA I	734	742	825	824	69	-91	-1.188	0
3110	8	6	12	UEA I	UEA I	849	850	867	873	61	-18	-0.377	0
3110	8	7	12	UEA-II	UEA-II	931	935	909	910	74	22	0.338	0
3110	8	8	12	UEA-II	UEA-II	647	660	934	936	48	-287	-5.75	0
3110	8	9	12	VFA	VFA	877	861	1014	1009	81	-137	-1.827	0
3110	8	10	12	VFA	VFA	842	845	1042	1025	90	-200	-2	0
3110	8	11	12	VVA	VVA	9115	9316	1071	1073	55	8044	149.873	0
3110	8	12	12	VVA	VVA	6634	6328	1075	1065	75	5559	70.173	0
3110	8	1	13	WFA	WFA	282	384	874	877	102	-592	-4.833	0
3110	8	2	13	WFA	WFA	362	452	891	862	119	-529	-3.445	0
3110	8	3	13	WGA	WGA	933	891	862	874	78	71	0.218	0
3110	8	4	13	WGA	WGA	806	788	790	788	62	16	0	0
3110	8	5	13	NEG	NEG	80	240	838	835	70	-758	-8.5	0
3110	8	6	13	NEG	NEG	108	270	862	868	66	-754	-9.061	0
3110	8	7	13	NEG	NEG	164	288	929	940	173	-765	-3.769	0
3110	8	8	13	NEG	NEG	133	234	954	956	57	-821	-12.667	0
3110	8	9	13	POS2	POS2	6682	6614	1014	1016	75	5668	74.64	0
3110	8	10	13	POS2	POS2	7626	7319	1047	1038	115	6579	54.617	0
3110	8	11	13	POS1	POS1	21550	20338	1090	1093	54	20460	356.389	0
3110	8	12	13	POS1	POS1	23551	21448	1082	1071	87	22469	234.218	0
2611	9	1	1	POS1	POS1	15574	12457	1182	1187	74	14392	152.297	0
2611	9	2	1	POS1	POS1	18464	14941	1143	1094	169	17321	81.935	0
2611	9	3	1	POS2	POS2	2418	3041	1117	1116	67	1301	28.731	0
2611	9	4	1	POS2	POS2	2378	3554	1111	1105	71	1267	34.493	0
2611	9	5	1	NEG	NEG	116	445	1094	1084	82	-978	-7.793	0
2611	9	6	1	NEG	NEG	212	485	1105	1106	110	-893	-5.645	0
2611	9	7	1	NEG	NEG	138	474	1130	1127	93	-992	-7.022	0
2611	9	8	1	NEG	NEG	159	640	1143	1137	126	-984	-3.944	0
2611	9	9	1	AAA	AAA	440	500	1174	1200	917	-734	-0.763	0
2611	9	10	1	AAA	AAA	458	484	1096	1039	185	-638	-3	0
2611	9	11	1	AAL	AAL	1180	1192	1135	1137	82	45	0.671	0
2611	9	12	1	AAL	AAL	1187	1208	1140	1135	57	47	1.281	0
2611	9	1	2	ACG	ACG	1270	1274	1216	1215	65	54	0.908	0
2611	9	2	2	ACG	ACG	1104	1093	1163	1117	176	-59	-0.136	0
2611	9	3	2	ACL	ACL	313	415	1133	1129	67	-820	-10.657	0
2611	9	4	2	ACL	ACL	371	455	1104	1094	80	-733	-7.987	0
2611	9	5	2	ASA	ASA	14391	12037	1079	1078	61	13312	179.656	0
2611	9	6	2	ASA	ASA	13083	10538	1079	1081	52	12004	181.865	0
2611	9	7	2	BANLEC	BANLEC	5046	4197	1097	1136	321	3949	9.536	0
2611	9	8	2	BANLEC	BANLEC	5246	4865	1105	1154	423	4141	8.773	0
2611	9	9	2	BC2L-A	BC2L-A	1169	1299	1152	1151	49	17	3.02	0
2611	9	10	2	BC2L-A	BC2L-A	1374	1618	1136	1083	176	238	3.04	0
2611	9	11	2	BC2LCN	BC2LCN	664	628	1137	1138	74	-473	-6.892	0
2611	9	12	2	BC2LCN	BC2LCN	788	769	1132	1134	47	-344	-7.766	0
2611	9	1	3	BPA; BPL	BPA; BPL	871	868	1242	1240	57	-371	-6.526	0
2611	9	2	3	BPA; BPL	BPA; BPL	812	807	1167	1126	281	-355	-1.135	0
2611	9	3	3	CALSEPA	CALSEPA	2934	5200	1152	1180	313	1782	12.843	0
2611	9	4	3	CALSEPA	CALSEPA	3105	5364	1114	1136	335	1991	12.621	0
2611	9	5	3	CGL2	CGL2	1368	2093	1090	1090	111	278	9.036	0
2611	9	6	3	CGL2	CGL2	1215	2047	1084	1085	49	131	19.633	0
2611	9	7	3	CNL	CNL	764	696	1110	1108	76	-346	-5.421	0
2611	9	8	3	CNL	CNL	888	749	1121	1105	87	-233	-4.092	0
2611	9	9	3	Con A	Con A	955	843	1175	1179	60	-220	-5.6	0
2611	9	10	3	Con A	Con A	1170	1194	1139	1087	194	31	0.552	0
2611	9	11	3	DBA	DBA	993	1015	1128	1130	57	-135	-2.018	0
2611	9	12	3	DBA	DBA	997	1022	1139	1143	77	-142	-1.571	0
2611	9	1	4	DISCOIDIN I	DISCOIDIN I	176	354	1198	1199	59	-1022	-14.322	0
2611	9	2	4	DISCOIDIN I	DISCOIDIN I	203	348	1147	1106	170	-944	-4.459	0
2611	9	3	4	DISCOIDIN II	DISCOIDIN II	417	498	1153	1148	61	-736	-10.656	0
2611	9	4	4	DISCOIDIN II	DISCOIDIN II	339	436	1131	1131	61	-792	-11.393	0
2611	9	5	4	DSA	DSA	4765	4460	1070	1063	73	3695	46.534	0
2611	9	6	4	DSA	DSA	4115	4056	1058	1063	52	3057	57.558	0
2611	9	7	4	ECA	ECA	436	511	1104	1099	64	-668	-9.187	0
2611	9	8	4	ECA	ECA	441	464	1124	1117	84	-683	-7.774	0
2611	9	9	4	EEL	EEL	364	475	1206	1214	83	-842	-8.904	0
2611	9	10	4	EEL	EEL	358	456	1175	1117	206	-817	-3.209	0
2611	9	11	4	F17AG	F17AG	481	531	1147	1152	74	-666	-8.392	0
2611	9	12	4	F17AG	F17AG	338	382	1151	1152	74	-813	-10.405	0
2611	9	1	5	GAL1	GAL1	136	406	1186	1189	55	-1050	-14.236	0
2611	9	2	5	GAL1	GAL1	176	500	1186	1143	183	-1010	-3.514	0
2611	9	3	5	GAL1-S	GAL1-S	173	362	1162	1155	70	-989	-11.329	0
2611	9	4	5	GAL1-S	GAL1-S	185	354	1138	1129	80	-953	-9.687	0
2611	9	5	5	GAL2	GAL2	608	597	1069	1061	75	-461	-6.187	0
2611	9	6	5	GAL2	GAL2	788	761	1030	1037	85	-242	-3.247	0
2611	9	7	5	GAL3	GAL3	56	257	1101	1090	82	-1045	-10.159	0
2611	9	8	5	GAL3	GAL3	61	217	1132	1129	256	-1071	-3.562	0
2611	9	9	5	GAL3C-S	GAL3C-S	1296	1276	1224	1227	81	72	0.605	0
2611	9	10	5	GAL3C-S	GAL3C-S	1266	1244	1213	1148	201	53	0.478	0
2611	9	11	5	GAL7-S	GAL7-S	763	707	1181	1182	60	-418	-7.917	0
2611	9	12	5	GAL7-S	GAL7-S	591	585	1148	1151	56	-557	-10.107	0
2611	9	1	6	GAL9	GAL9	166	316	1183	1197	154	-1017	-5.721	0
2611	9	2	6	GAL9	GAL9	182	428	1161	1118	175	-979	-3.943	0
2611	9	3	6	GNA	GNA	26413	28111	1095	1089	67	25318	403.313	0
2611	9	4	6	GNA	GNA	22860	22656	1082	1069	105	21778	205.59	0
2611	9	5	6	GRFT	GRFT	4839	6516	1023	1026	78	3816	70.385	0
2611	9	6	6	GRFT	GRFT	4552	6530	1060	1054	100	3492	54.76	0
2611	9	7	6	GS-I;?GSL-I	GS-I;?GSL-I	1007	950	1120	1119	77	-113	-2.195	0
2611	9	8	6	GS-I;?GSL-I	GS-I;?GSL-I	936	921	1160	1145	87	-224	-2.575	0
2611	9	9	6	GS-II; GSL-II	GS-II; GSL-II	488	555	1211	1211	73	-723	-8.986	0
2611	9	10	6	GS-II; GSL-II	GS-II; GSL-II	518	565	1209	1154	187	-691	-3.15	0
2611	9	11	6	HHA; HHL	HHA; HHL	16338	12894	1218	1216	56	15120	208.536	0
2611	9	12	6	HHA; HHL	HHA; HHL	16773	13467	1166	1169	60	15607	204.967	0
2611	9	1	7	Jacalin	Jacalin	633	684	1193	1203	79	-560	-6.57	0
2611	9	2	7	Jacalin	Jacalin	664	718	1159	1116	166	-495	-2.398	0
2611	9	3	7	LBA	LBA	399	410	1117	1119	279	-718	-2.541	0
2611	9	4	7	LBA	LBA	523	542	1074	1074	123	-551	-4.325	0
2611	9	5	7	LcH A	LcH A	692	721	1014	1017	75	-322	-3.947	0
2611	9	6	7	LcH A	LcH A	742	765	1092	1096	80	-350	-4.137	0
2611	9	7	7	LEA	LEA	700	721	1111	1104	77	-411	-4.974	0
2611	9	8	7	LEA	LEA	667	680	1150	1135	93	-483	-4.892	0
2611	9	9	7	LENTIL	LENTIL	1307	1293	1215	1215	57	92	1.368	0
2611	9	10	7	LENTIL	LENTIL	993	1014	1190	1134	193	-197	-0.622	0
2611	9	11	7	Lotus	Lotus	681	669	1197	1195	62	-516	-8.484	0
2611	9	12	7	Lotus	Lotus	679	674	1136	1140	205	-457	-2.273	0
2611	9	1	8	LSL-N	LSL-N	1541	1550	1196	1202	82	345	4.244	0
2611	9	2	8	LSL-N	LSL-N	1574	1593	1142	1103	170	432	2.882	0
2611	9	3	8	MAA; MAL	MAA; MAL	5589	5015	1197	1201	99	4392	38.525	0
2611	9	4	8	MAA; MAL	MAA; MAL	5254	4719	1117	1119	91	4137	39.56	0
2611	9	5	8	MALECTIN	MALECTIN	782	807	1082	1080	86	-300	-3.174	0
2611	9	6	8	MALECTIN	MALECTIN	586	600	1097	1102	62	-511	-8.097	0
2611	9	7	8	MOA	MOA	395	469	1100	1097	71	-705	-8.845	0
2611	9	8	8	MOA	MOA	399	471	1110	1099	80	-711	-7.85	0
2611	9	9	8	MPL; MPA	MPL; MPA	1518	1384	1191	1191	55	327	3.509	0
2611	9	10	8	MPL; MPA	MPL; MPA	1522	1392	1155	1101	185	367	1.573	0
2611	9	11	8	NPA	NPA	10124	8829	1169	1167	56	8955	136.821	0
2611	9	12	8	NPA	NPA	8804	7662	1152	1246	268	7652	23.94	0
2611	9	1	9	ORYSATA	ORYSATA	1061	1135	1310	1328	123	-249	-1.569	0
2611	9	2	9	ORYSATA	ORYSATA	971	1043	1243	1219	190	-272	-0.926	0
2611	9	3	9	PA-IIL	PA-IIL	568	730	1247	1256	124	-679	-4.242	0
2611	9	4	9	PA-IIL	PA-IIL	486	669	1177	1178	106	-691	-4.802	0
2611	9	5	9	PA-IL	PA-IL	312	315	1132	1127	144	-820	-5.639	0
2611	9	6	9	PA-IL	PA-IL	307	310	1148	1152	73	-841	-11.534	0
2611	9	7	9	PALa	PALa	900	3343	1157	1155	73	-257	29.973	0
2611	9	8	9	PALa	PALa	851	3068	1151	1146	96	-300	20.021	0
2611	9	9	9	PHA-E	PHA-E	2239	2218	1225	1225	61	1014	16.279	0
2611	9	10	9	PHA-E	PHA-E	3603	3655	1210	1147	197	2393	12.731	0
2611	9	11	9	PHA-L	PHA-L	1024	1072	1233	1230	59	-209	-2.678	0
2611	9	12	9	PHA-L	PHA-L	1159	1204	1201	1203	64	-42	0.016	0
2611	9	1	10	PHA-P	PHA-P	1008	1031	1316	1323	144	-308	-2.028	0
2611	9	2	10	PHA-P	PHA-P	1019	1034	1231	1201	181	-212	-0.923	0
2611	9	3	10	PNA	PNA	390	454	1198	1185	144	-808	-5.076	0
2611	9	4	10	PNA	PNA	509	588	1139	1126	107	-630	-5.028	0
2611	9	5	10	PPL	PPL	988	854	1189	1187	73	-201	-4.562	0
2611	9	6	10	PPL	PPL	1007	917	1211	1212	57	-204	-5.175	0
2611	9	7	10	PSA/PEA	PSA/PEA	1503	1434	1192	1191	169	311	1.438	0
2611	9	8	10	PSA/PEA	PSA/PEA	1056	1062	1169	1162	86	-113	-1.163	0
2611	9	9	10	PSL1A	PSL1A	1305	2740	1220	1219	55	85	27.655	0
2611	9	10	10	PSL1A	PSL1A	1492	2880	1221	1172	181	271	9.436	0
2611	9	11	10	PTL	PTL	1341	1300	1199	1198	64	142	1.594	0
2611	9	12	10	PTL	PTL	1257	1229	1106	1067	135	151	1.2	0
2611	9	1	11	RS-FUC	RS-FUC	660	629	1235	1252	103	-575	-6.049	0
2611	9	2	11	RS-FUC	RS-FUC	655	642	1218	1173	171	-563	-3.105	0
2611	9	3	11	SAMB	SAMB	19256	17795	1193	1188	75	18063	221.427	0
2611	9	4	11	SAMB	SAMB	16098	16976	1208	1216	146	14890	107.945	0
2611	9	5	11	SBA	SBA	448	510	1197	1195	77	-749	-8.896	0
2611	9	6	11	SBA	SBA	517	576	1237	1241	101	-720	-6.584	0
2611	9	7	11	SJA	SJA	650	657	1195	1193	86	-545	-6.233	0
2611	9	8	11	SJA	SJA	732	739	1195	1187	81	-463	-5.531	0
2611	9	9	11	SNA-I	SNA-I	2663	2509	1234	1236	72	1429	17.681	0
2611	9	10	11	SNA-I	SNA-I	4272	3893	1210	1152	197	3062	13.914	0
2611	9	11	11	SNA-II	SNA-II	1029	983	1166	1162	62	-137	-2.887	0
2611	9	12	11	SNA-II	SNA-II	902	876	1155	1139	93	-253	-2.828	0
2611	9	1	12	STL	STL	1969	1935	1260	1263	58	709	11.586	0
2611	9	2	12	STL	STL	1743	1707	1227	1184	167	516	3.132	0
2611	9	3	12	UDA	UDA	914	890	1203	1201	77	-289	-4.039	0
2611	9	4	12	UDA	UDA	855	858	1191	1187	76	-336	-4.329	0
2611	9	5	12	UEA I	UEA I	3393	3234	1231	1226	86	2162	23.349	0
2611	9	6	12	UEA I	UEA I	3136	2987	1249	1248	63	1887	27.603	0
2611	9	7	12	UEA-II	UEA-II	1282	1277	1250	1246	70	32	0.443	0
2611	9	8	12	UEA-II	UEA-II	1215	1208	1224	1221	83	-9	-0.157	0
2611	9	9	12	VFA	VFA	1200	1205	1307	1317	87	-107	-1.287	0
2611	9	10	12	VFA	VFA	950	957	1220	1164	192	-270	-1.078	0
2611	9	11	12	VVA	VVA	10010	9143	1197	1209	235	8813	33.762	0
2611	9	12	12	VVA	VVA	6699	5827	1223	1241	223	5476	20.565	0
2611	9	1	13	WFA	WFA	596	664	1298	1301	62	-702	-10.274	0
2611	9	2	13	WFA	WFA	637	685	1242	1202	174	-605	-2.971	0
2611	9	3	13	WGA	WGA	1171	1145	1199	1153	169	-28	-0.047	0
2611	9	4	13	WGA	WGA	1217	1180	1209	1202	73	8	-0.301	0
2611	9	5	13	NEG	NEG	89	299	1238	1225	93	-1149	-9.957	0
2611	9	6	13	NEG	NEG	84	334	1276	1277	74	-1192	-12.743	0
2611	9	7	13	NEG	NEG	202	341	1265	1260	86	-1063	-10.686	0
2611	9	8	13	NEG	NEG	192	376	1234	1215	105	-1042	-7.99	0
2611	9	9	13	POS2	POS2	6336	7051	1286	1291	71	5050	81.127	0
2611	9	10	13	POS2	POS2	7678	7727	1259	1205	180	6419	36.233	0
2611	9	11	13	POS1	POS1	21896	20882	1287	1284	94	20609	208.489	0
2611	9	12	13	POS1	POS1	23573	21983	1291	1289	115	22282	179.948	0
3111	10	1	1	POS1	POS1	15928	12957	1650	1647	111	14278	101.892	0
3111	10	2	1	POS1	POS1	18128	15708	1634	1593	209	16494	67.536	0
3111	10	3	1	POS2	POS2	2372	3153	1637	1639	79	735	19.165	0
3111	10	4	1	POS2	POS2	2335	3520	1635	1635	118	700	15.975	0
3111	10	5	1	NEG	NEG	125	786	1599	1583	177	-1474	-4.503	0
3111	10	6	1	NEG	NEG	119	666	1576	1586	145	-1457	-6.345	0
3111	10	7	1	NEG	NEG	290	709	1706	1696	126	-1416	-7.833	0
3111	10	8	1	NEG	NEG	277	803	1790	1773	188	-1513	-5.16	0
3111	10	9	1	AAA	AAA	736	900	1806	1798	103	-1070	-8.718	0
3111	10	10	1	AAA	AAA	770	1036	1909	1889	152	-1139	-5.612	0
3111	10	11	1	AAL	AAL	1040	1225	2005	2023	176	-965	-4.534	0
3111	10	12	1	AAL	AAL	1202	1405	2032	2000	198	-830	-3.005	0
3111	10	1	2	ACG	ACG	1543	1526	1642	1639	131	-99	-0.863	0
3111	10	2	2	ACG	ACG	1500	1491	1600	1554	191	-100	-0.33	0
3111	10	3	2	ACL	ACL	480	732	1618	1623	98	-1138	-9.092	0
3111	10	4	2	ACL	ACL	497	769	1608	1610	117	-1111	-7.188	0
3111	10	5	2	ASA	ASA	12591	10763	1616	1603	130	10975	70.462	0
3111	10	6	2	ASA	ASA	13368	11327	1663	1659	161	11705	60.05	0
3111	10	7	2	BANLEC	BANLEC	4592	4929	1691	1699	287	2901	11.254	0
3111	10	8	2	BANLEC	BANLEC	6535	6181	1793	1781	178	4742	24.719	0
3111	10	9	2	BC2L-A	BC2L-A	1905	1966	1816	1839	373	89	0.34	0
3111	10	10	2	BC2L-A	BC2L-A	1954	1891	1890	1886	222	64	0.023	0
3111	10	11	2	BC2LCN	BC2LCN	1094	1107	1986	2002	145	-892	-6.172	0
3111	10	12	2	BC2LCN	BC2LCN	1237	1303	2036	2020	274	-799	-2.617	0
3111	10	1	3	BPA; BPL	BPA; BPL	946	985	1637	1627	124	-691	-5.177	0
3111	10	2	3	BPA; BPL	BPA; BPL	947	949	1555	1515	191	-608	-2.963	0
3111	10	3	3	CALSEPA	CALSEPA	4275	8405	1548	1552	164	2727	41.787	0
3111	10	4	3	CALSEPA	CALSEPA	5184	9321	1573	1584	265	3611	29.196	0
3111	10	5	3	CGL2	CGL2	1695	3205	1584	1573	135	111	12.089	0
3111	10	6	3	CGL2	CGL2	2597	3829	1617	1645	185	980	11.805	0
3111	10	7	3	CNL	CNL	1067	1130	1701	1705	152	-634	-3.783	0
3111	10	8	3	CNL	CNL	1341	1338	1843	1850	153	-502	-3.346	0
3111	10	9	3	Con A	Con A	930	1109	1921	1936	163	-991	-5.074	0
3111	10	10	3	Con A	Con A	967	1112	1894	1909	196	-927	-4.066	0
3111	10	11	3	DBA	DBA	1105	1278	1991	1997	105	-886	-6.848	0
3111	10	12	3	DBA	DBA	1235	1345	2037	2021	131	-802	-5.16	0
3111	10	1	4	DISCOIDIN I	DISCOIDIN I	257	562	1691	1684	143	-1434	-7.846	0
3111	10	2	4	DISCOIDIN I	DISCOIDIN I	284	462	1576	1546	231	-1292	-4.693	0
3111	10	3	4	DISCOIDIN II	DISCOIDIN II	433	598	1557	1575	112	-1124	-8.723	0
3111	10	4	4	DISCOIDIN II	DISCOIDIN II	549	696	1541	1546	141	-992	-6.028	0
3111	10	5	4	DSA	DSA	5891	5775	1509	1508	133	4382	32.083	0
3111	10	6	4	DSA	DSA	6010	5827	1500	1517	142	4510	30.352	0
3111	10	7	4	ECA	ECA	538	569	1692	1699	154	-1154	-7.338	0
3111	10	8	4	ECA	ECA	538	566	1796	1823	185	-1258	-6.795	0
3111	10	9	4	EEL	EEL	1328	1425	1887	1887	189	-559	-2.444	0
3111	10	10	4	EEL	EEL	1247	1344	1905	1897	202	-658	-2.738	0
3111	10	11	4	F17AG	F17AG	777	870	1959	1975	141	-1182	-7.837	0
3111	10	12	4	F17AG	F17AG	812	926	1999	1981	138	-1187	-7.645	0
3111	10	1	5	GAL1	GAL1	166	637	1730	1745	197	-1564	-5.624	0
3111	10	2	5	GAL1	GAL1	255	635	1638	1608	221	-1383	-4.403	0
3111	10	3	5	GAL1-S	GAL1-S	329	515	1506	1497	138	-1177	-7.116	0
3111	10	4	5	GAL1-S	GAL1-S	318	448	1443	1424	136	-1125	-7.176	0
3111	10	5	5	GAL2	GAL2	656	634	1473	1470	148	-817	-5.649	0
3111	10	6	5	GAL2	GAL2	688	663	1437	1468	218	-749	-3.693	0
3111	10	7	5	GAL3	GAL3	87	415	1736	1738	161	-1649	-8.217	0
3111	10	8	5	GAL3	GAL3	157	460	1786	1821	343	-1629	-3.968	0
3111	10	9	5	GAL3C-S	GAL3C-S	1916	1964	1862	1877	237	54	0.367	0
3111	10	10	5	GAL3C-S	GAL3C-S	1920	1918	1907	1923	368	13	-0.014	0
3111	10	11	5	GAL7-S	GAL7-S	1298	1242	1945	1950	113	-647	-6.265	0
3111	10	12	5	GAL7-S	GAL7-S	1416	1330	1970	1955	136	-554	-4.596	0
3111	10	1	6	GAL9	GAL9	186	419	1654	1675	167	-1468	-7.521	0
3111	10	2	6	GAL9	GAL9	286	455	1548	1534	347	-1262	-3.11	0
3111	10	3	6	GNA	GNA	25341	25730	1468	1476	149	23873	162.779	0
3111	10	4	6	GNA	GNA	23728	22274	1275	1305	174	22453	120.511	0
3111	10	5	6	GRFT	GRFT	5335	7753	1174	1168	133	4161	49.511	0
3111	10	6	6	GRFT	GRFT	6579	7936	1372	1400	189	5207	34.582	0
3111	10	7	6	GS-I;?GSL-I	GS-I;?GSL-I	1590	1519	1632	1631	140	-42	-0.8	0
3111	10	8	6	GS-I;?GSL-I	GS-I;?GSL-I	1471	1384	1775	1795	152	-304	-2.704	0
3111	10	9	6	GS-II; GSL-II	GS-II; GSL-II	549	779	1847	1867	204	-1298	-5.333	0
3111	10	10	6	GS-II; GSL-II	GS-II; GSL-II	930	1015	1906	1899	188	-976	-4.702	0
3111	10	11	6	HHA; HHL	HHA; HHL	16013	13321	1861	1838	156	14152	73.609	0
3111	10	12	6	HHA; HHL	HHA; HHL	17271	13965	1938	1922	135	15333	89.207	0
3111	10	1	7	Jacalin	Jacalin	891	978	1699	1709	185	-808	-3.951	0
3111	10	2	7	Jacalin	Jacalin	836	906	1648	1632	238	-812	-3.05	0
3111	10	3	7	LBA	LBA	387	423	1523	1529	183	-1136	-6.044	0
3111	10	4	7	LBA	LBA	423	462	1220	1217	148	-797	-5.101	0
3111	10	5	7	LcH A	LcH A	881	896	1007	1013	136	-126	-0.86	0
3111	10	6	7	LcH A	LcH A	1018	1071	1237	1246	168	-219	-1.042	0
3111	10	7	7	LEA	LEA	789	862	1564	1550	152	-775	-4.526	0
3111	10	8	7	LEA	LEA	950	1023	1711	1717	164	-761	-4.232	0
3111	10	9	7	LENTIL	LENTIL	1557	1638	1761	1775	157	-204	-0.873	0
3111	10	10	7	LENTIL	LENTIL	1635	1648	1793	1773	171	-158	-0.731	0
3111	10	11	7	Lotus	Lotus	965	945	1789	1784	141	-824	-5.95	0
3111	10	12	7	Lotus	Lotus	1055	1077	1701	1693	155	-646	-3.974	0
3111	10	1	8	LSL-N	LSL-N	2003	1987	1752	1772	188	251	1.144	0
3111	10	2	8	LSL-N	LSL-N	2053	2084	1767	1736	304	286	1.145	0
3111	10	3	8	MAA; MAL	MAA; MAL	6223	5169	1664	1688	178	4559	19.556	0
3111	10	4	8	MAA; MAL	MAA; MAL	6196	5081	1433	1449	149	4763	24.376	0
3111	10	5	8	MALECTIN	MALECTIN	916	892	1285	1264	105	-369	-3.543	0
3111	10	6	8	MALECTIN	MALECTIN	1054	1031	1391	1401	146	-337	-2.534	0
3111	10	7	8	MOA	MOA	481	606	1566	1517	289	-1085	-3.152	0
3111	10	8	8	MOA	MOA	537	720	1706	1714	185	-1169	-5.373	0
3111	10	9	8	MPL; MPA	MPL; MPA	2365	2194	1790	1810	227	575	1.692	0
3111	10	10	8	MPL; MPA	MPL; MPA	2096	1965	1889	1882	267	207	0.311	0
3111	10	11	8	NPA	NPA	10446	9575	1840	1832	147	8606	52.673	0
3111	10	12	8	NPA	NPA	10794	9511	1897	1885	246	8897	31	0
3111	10	1	9	ORYSATA	ORYSATA	1347	1290	1898	1903	166	-551	-3.693	0
3111	10	2	9	ORYSATA	ORYSATA	1427	1380	1861	1833	249	-434	-1.819	0
3111	10	3	9	PA-IIL	PA-IIL	769	1157	1739	1746	181	-970	-3.254	0
3111	10	4	9	PA-IIL	PA-IIL	685	1056	1468	1492	123	-783	-3.545	0
3111	10	5	9	PA-IL	PA-IL	451	520	1456	1459	147	-1005	-6.388	0
3111	10	6	9	PA-IL	PA-IL	425	476	1597	1612	125	-1172	-9.088	0
3111	10	7	9	PALa	PALa	1493	2737	1777	1809	229	-284	4.052	0
3111	10	8	9	PALa	PALa	1302	2272	1828	1865	177	-526	2.299	0
3111	10	9	9	PHA-E	PHA-E	2257	2279	1903	1919	189	354	1.905	0
3111	10	10	9	PHA-E	PHA-E	3698	3716	2012	2002	205	1686	8.361	0
3111	10	11	9	PHA-L	PHA-L	1113	1223	1960	1986	163	-847	-4.681	0
3111	10	12	9	PHA-L	PHA-L	1300	1396	2006	1996	140	-706	-4.286	0
3111	10	1	10	PHA-P	PHA-P	1430	1443	1940	1960	329	-510	-1.571	0
3111	10	2	10	PHA-P	PHA-P	1507	1528	1835	1816	264	-328	-1.091	0
3111	10	3	10	PNA	PNA	721	831	1794	1812	211	-1073	-4.649	0
3111	10	4	10	PNA	PNA	621	766	1525	1533	153	-904	-5.013	0
3111	10	5	10	PPL	PPL	1281	1156	1604	1608	147	-323	-3.075	0
3111	10	6	10	PPL	PPL	1367	1245	1675	1700	129	-308	-3.527	0
3111	10	7	10	PSA/PEA	PSA/PEA	1618	1640	1749	1744	221	-131	-0.471	0
3111	10	8	10	PSA/PEA	PSA/PEA	1748	1780	1845	1865	173	-97	-0.491	0
3111	10	9	10	PSL1A	PSL1A	2016	5280	1882	1889	227	134	14.938	0
3111	10	10	10	PSL1A	PSL1A	2234	5243	2042	2018	234	192	13.782	0
3111	10	11	10	PTL	PTL	2043	2005	1994	2003	99	49	0.02	0
3111	10	12	10	PTL	PTL	2080	2054	2021	2006	144	59	0.333	0
3111	10	1	11	RS-FUC	RS-FUC	1037	898	2022	2036	182	-985	-6.253	0
3111	10	2	11	RS-FUC	RS-FUC	793	770	1931	1912	273	-1138	-4.183	0
3111	10	3	11	SAMB	SAMB	23232	21875	1859	1887	214	21373	93.402	0
3111	10	4	11	SAMB	SAMB	22137	19834	1574	1624	253	20563	71.976	0
3111	10	5	11	SBA	SBA	662	735	1610	1600	126	-948	-6.865	0
3111	10	6	11	SBA	SBA	425	574	1666	1675	89	-1241	-12.371	0
3111	10	7	11	SJA	SJA	1032	1044	1749	1761	155	-717	-4.626	0
3111	10	8	11	SJA	SJA	1213	1245	1922	1947	206	-709	-3.408	0
3111	10	9	11	SNA-I	SNA-I	5546	4942	1875	1875	169	3671	18.148	0
3111	10	10	11	SNA-I	SNA-I	6017	5648	2010	1994	180	4007	20.3	0
3111	10	11	11	SNA-II	SNA-II	1336	1342	2056	2058	98	-720	-7.306	0
3111	10	12	11	SNA-II	SNA-II	1440	1455	2043	2030	148	-603	-3.885	0
3111	10	1	12	STL	STL	3710	3560	1995	2001	200	1715	7.795	0
3111	10	2	12	STL	STL	3361	3199	1942	1911	301	1419	4.279	0
3111	10	3	12	UDA	UDA	1252	1262	1788	1795	154	-536	-3.461	0
3111	10	4	12	UDA	UDA	991	1017	1567	1580	138	-576	-4.08	0
3111	10	5	12	UEA I	UEA I	1284	1285	1622	1610	117	-338	-2.778	0
3111	10	6	12	UEA I	UEA I	1179	1178	1690	1700	103	-511	-5.068	0
3111	10	7	12	UEA-II	UEA-II	1491	1508	1763	1756	91	-272	-2.725	0
3111	10	8	12	UEA-II	UEA-II	1538	1547	1827	1825	77	-289	-3.61	0
3111	10	9	12	VFA	VFA	1642	1692	1935	1948	140	-293	-1.829	0
3111	10	10	12	VFA	VFA	1608	1687	1979	1963	167	-371	-1.653	0
3111	10	11	12	VVA	VVA	7157	7061	2122	2139	176	5035	27.966	0
3111	10	12	12	VVA	VVA	10519	10687	2032	2015	152	8487	57.053	0
3111	10	1	13	WFA	WFA	558	784	1846	1871	168	-1288	-6.47	0
3111	10	2	13	WFA	WFA	646	851	1852	1812	236	-1206	-4.072	0
3111	10	3	13	WGA	WGA	1683	1682	1825	1843	153	-142	-1.052	0
3111	10	4	13	WGA	WGA	1585	1572	1611	1630	214	-26	-0.271	0
3111	10	5	13	NEG	NEG	184	429	1633	1627	114	-1449	-10.509	0
3111	10	6	13	NEG	NEG	146	456	1718	1719	91	-1572	-13.879	0
3111	10	7	13	NEG	NEG	276	490	1806	1796	121	-1530	-10.793	0
3111	10	8	13	NEG	NEG	298	476	1878	1884	83	-1580	-16.964	0
3111	10	9	13	POS2	POS2	6833	7993	1958	1970	180	4875	33.461	0
3111	10	10	13	POS2	POS2	7289	7880	1998	1990	153	5291	38.497	0
3111	10	11	13	POS1	POS1	22151	19715	2134	2139	129	20017	136.248	0
3111	10	12	13	POS1	POS1	23801	20328	2080	2075	146	21721	125.021	0
2616	11	1	1	POS1	POS1	15894	13054	1141	1146	69	14753	172.58	0
2616	11	2	1	POS1	POS1	18207	15072	1109	1082	125	17098	111.92	0
2616	11	3	1	POS2	POS2	2460	2913	1063	1063	93	1397	19.892	0
2616	11	4	1	POS2	POS2	2343	3407	1043	1038	60	1300	39.483	0
2616	11	5	1	NEG	NEG	93	356	999	1002	69	-906	-9.362	0
2616	11	6	1	NEG	NEG	79	363	976	980	65	-897	-9.492	0
2616	11	7	1	NEG	NEG	124	393	1074	1067	65	-950	-10.369	0
2616	11	8	1	NEG	NEG	102	417	1088	1085	70	-986	-9.543	0
2616	11	9	1	AAA	AAA	399	485	1109	1108	51	-710	-12.216	0
2616	11	10	1	AAA	AAA	410	490	1072	1050	158	-662	-3.544	0
2616	11	11	1	AAL	AAL	814	879	1106	1114	81	-292	-2.901	0
2616	11	12	1	AAL	AAL	821	835	1093	1090	56	-272	-4.554	0
2616	11	1	2	ACG	ACG	970	964	1092	1093	58	-122	-2.224	0
2616	11	2	2	ACG	ACG	984	959	1062	1039	125	-78	-0.64	0
2616	11	3	2	ACL	ACL	293	356	1033	1028	54	-740	-12.444	0
2616	11	4	2	ACL	ACL	366	430	1025	1017	72	-659	-8.153	0
2616	11	5	2	ASA	ASA	13224	10714	979	982	53	12245	183.623	0
2616	11	6	2	ASA	ASA	12435	10315	966	971	58	11469	161.103	0
2616	11	7	2	BANLEC	BANLEC	4938	4414	1057	1053	70	3881	48.014	0
2616	11	8	2	BANLEC	BANLEC	5425	4280	1075	1071	76	4350	42.224	0
2616	11	9	2	BC2L-A	BC2L-A	1173	1361	1119	1119	51	54	4.745	0
2616	11	10	2	BC2L-A	BC2L-A	1279	1356	1075	1048	160	204	1.925	0
2616	11	11	2	BC2LCN	BC2LCN	845	813	1076	1080	57	-231	-4.684	0
2616	11	12	2	BC2LCN	BC2LCN	861	847	1121	1118	60	-260	-4.517	0
2616	11	1	3	BPA; BPL	BPA; BPL	704	725	1113	1114	69	-409	-5.638	0
2616	11	2	3	BPA; BPL	BPA; BPL	986	970	1059	1029	129	-73	-0.457	0
2616	11	3	3	CALSEPA	CALSEPA	2198	3604	1023	1022	58	1175	44.517	0
2616	11	4	3	CALSEPA	CALSEPA	2310	4079	998	997	59	1312	52.237	0
2616	11	5	3	CGL2	CGL2	991	1328	975	976	52	16	6.769	0
2616	11	6	3	CGL2	CGL2	976	1479	952	965	78	24	6.59	0
2616	11	7	3	CNL	CNL	600	621	1031	1028	71	-431	-5.732	0
2616	11	8	3	CNL	CNL	724	681	1077	1074	69	-353	-5.696	0
2616	11	9	3	Con A	Con A	962	973	1127	1130	59	-165	-2.661	0
2616	11	10	3	Con A	Con A	827	825	1077	1055	261	-250	-0.881	0
2616	11	11	3	DBA	DBA	934	947	1072	1074	51	-138	-2.49	0
2616	11	12	3	DBA	DBA	966	1004	1139	1139	58	-173	-2.328	0
2616	11	1	4	DISCOIDIN I	DISCOIDIN I	199	358	1149	1148	60	-950	-13.167	0
2616	11	2	4	DISCOIDIN I	DISCOIDIN I	229	342	1027	974	161	-798	-3.925	0
2616	11	3	4	DISCOIDIN II	DISCOIDIN II	311	399	983	970	101	-672	-5.653	0
2616	11	4	4	DISCOIDIN II	DISCOIDIN II	343	411	984	987	57	-641	-10.105	0
2616	11	5	4	DSA	DSA	2729	2664	936	939	70	1793	24.643	0
2616	11	6	4	DSA	DSA	3104	2967	919	928	72	2185	28.319	0
2616	11	7	4	ECA	ECA	409	432	1024	1025	76	-615	-7.803	0
2616	11	8	4	ECA	ECA	409	428	1087	1079	74	-678	-8.797	0
2616	11	9	4	EEL	EEL	436	508	1118	1122	71	-682	-8.648	0
2616	11	10	4	EEL	EEL	371	447	1115	1076	149	-744	-4.221	0
2616	11	11	4	F17AG	F17AG	541	611	1086	1087	53	-545	-8.981	0
2616	11	12	4	F17AG	F17AG	551	619	1108	1110	64	-557	-7.672	0
2616	11	1	5	GAL1	GAL1	85	340	1117	1115	62	-1032	-12.5	0
2616	11	2	5	GAL1	GAL1	121	302	1029	1005	131	-908	-5.366	0
2616	11	3	5	GAL1-S	GAL1-S	139	267	995	994	107	-856	-6.794	0
2616	11	4	5	GAL1-S	GAL1-S	180	304	949	944	69	-769	-9.275	0
2616	11	5	5	GAL2	GAL2	444	457	896	899	65	-452	-6.8	0
2616	11	6	5	GAL2	GAL2	436	422	921	925	63	-485	-7.984	0
2616	11	7	5	GAL3	GAL3	62	144	1009	1014	64	-947	-13.594	0
2616	11	8	5	GAL3	GAL3	63	161	1068	1062	80	-1005	-11.262	0
2616	11	9	5	GAL3C-S	GAL3C-S	1231	1186	1129	1127	56	102	1.054	0
2616	11	10	5	GAL3C-S	GAL3C-S	1272	1217	1102	1067	142	170	1.056	0
2616	11	11	5	GAL7-S	GAL7-S	673	621	1096	1102	62	-423	-7.758	0
2616	11	12	5	GAL7-S	GAL7-S	465	520	1084	1086	64	-619	-8.844	0
2616	11	1	6	GAL9	GAL9	94	223	1030	1025	67	-936	-11.97	0
2616	11	2	6	GAL9	GAL9	148	274	976	957	207	-828	-3.3	0
2616	11	3	6	GNA	GNA	26627	26402	898	903	112	25729	227.67	0
2616	11	4	6	GNA	GNA	25368	23410	820	817	229	24548	98.659	0
2616	11	5	6	GRFT	GRFT	1335	6865	736	736	92	599	66.62	0
2616	11	6	6	GRFT	GRFT	4466	7770	912	918	67	3554	102.269	0
2616	11	7	6	GS-I;?GSL-I	GS-I;?GSL-I	863	874	973	973	53	-110	-1.868	0
2616	11	8	6	GS-I;?GSL-I	GS-I;?GSL-I	856	843	1023	1023	75	-167	-2.4	0
2616	11	9	6	GS-II; GSL-II	GS-II; GSL-II	500	573	1111	1112	83	-611	-6.494	0
2616	11	10	6	GS-II; GSL-II	GS-II; GSL-II	694	714	1112	1079	143	-418	-2.552	0
2616	11	11	6	HHA; HHL	HHA; HHL	17141	13636	1131	1128	57	16010	219.439	0
2616	11	12	6	HHA; HHL	HHA; HHL	17029	13703	1065	1066	47	15964	268.872	0
2616	11	1	7	Jacalin	Jacalin	692	712	1051	1052	68	-359	-5	0
2616	11	2	7	Jacalin	Jacalin	584	614	1047	1026	198	-463	-2.081	0
2616	11	3	7	LBA	LBA	386	450	878	896	133	-492	-3.353	0
2616	11	4	7	LBA	LBA	391	413	740	736	118	-349	-2.737	0
2616	11	5	7	LcH A	LcH A	435	467	604	599	73	-169	-1.808	0
2616	11	6	7	LcH A	LcH A	570	620	874	863	89	-304	-2.73	0
2616	11	7	7	LEA	LEA	580	621	970	972	78	-390	-4.5	0
2616	11	8	7	LEA	LEA	596	638	1001	1003	128	-405	-2.852	0
2616	11	9	7	LENTIL	LENTIL	773	820	1083	1081	116	-310	-2.25	0
2616	11	10	7	LENTIL	LENTIL	772	804	1055	1026	138	-283	-1.609	0
2616	11	11	7	Lotus	Lotus	665	625	1067	1063	77	-402	-5.688	0
2616	11	12	7	Lotus	Lotus	609	588	978	969	81	-369	-4.704	0
2616	11	1	8	LSL-N	LSL-N	1488	1418	1060	1076	94	428	3.638	0
2616	11	2	8	LSL-N	LSL-N	1316	1322	1057	1079	518	259	0.469	0
2616	11	3	8	MAA; MAL	MAA; MAL	2786	2576	956	942	114	1830	14.333	0
2616	11	4	8	MAA; MAL	MAA; MAL	2813	2552	775	769	78	2038	22.859	0
2616	11	5	8	MALECTIN	MALECTIN	645	648	838	830	128	-193	-1.422	0
2616	11	6	8	MALECTIN	MALECTIN	683	683	920	930	330	-237	-0.748	0
2616	11	7	8	MOA	MOA	333	407	945	950	84	-612	-6.464	0
2616	11	8	8	MOA	MOA	337	405	957	959	73	-620	-7.589	0
2616	11	9	8	MPL; MPA	MPL; MPA	1413	1292	1035	1039	74	378	3.419	0
2616	11	10	8	MPL; MPA	MPL; MPA	1455	1331	1058	1028	143	397	2.119	0
2616	11	11	8	NPA	NPA	9696	8652	1081	1076	72	8615	105.222	0
2616	11	12	8	NPA	NPA	9572	8649	1064	1052	99	8508	76.737	0
2616	11	1	9	ORYSATA	ORYSATA	648	665	1110	1113	93	-462	-4.817	0
2616	11	2	9	ORYSATA	ORYSATA	629	672	1072	1041	139	-443	-2.655	0
2616	11	3	9	PA-IIL	PA-IIL	245	479	1008	998	88	-763	-5.898	0
2616	11	4	9	PA-IIL	PA-IIL	211	439	848	839	89	-637	-4.494	0
2616	11	5	9	PA-IL	PA-IL	287	274	989	986	82	-702	-8.683	0
2616	11	6	9	PA-IL	PA-IL	243	264	1027	1029	49	-784	-15.612	0
2616	11	7	9	PALa	PALa	575	2324	1034	1035	76	-459	16.961	0
2616	11	8	9	PALa	PALa	596	1851	1061	1071	249	-465	3.133	0
2616	11	9	9	PHA-E	PHA-E	978	967	1114	1120	77	-136	-1.987	0
2616	11	10	9	PHA-E	PHA-E	1817	1880	1153	1109	165	664	4.673	0
2616	11	11	9	PHA-L	PHA-L	737	751	1156	1156	53	-419	-7.642	0
2616	11	12	9	PHA-L	PHA-L	833	858	1166	1180	90	-333	-3.578	0
2616	11	1	10	PHA-P	PHA-P	738	760	1108	1117	67	-370	-5.328	0
2616	11	2	10	PHA-P	PHA-P	766	778	1078	1065	138	-312	-2.08	0
2616	11	3	10	PNA	PNA	476	572	1003	973	147	-527	-2.728	0
2616	11	4	10	PNA	PNA	500	536	903	890	148	-403	-2.392	0
2616	11	5	10	PPL	PPL	870	809	1047	1049	64	-177	-3.75	0
2616	11	6	10	PPL	PPL	864	791	1065	1071	79	-201	-3.544	0
2616	11	7	10	PSA/PEA	PSA/PEA	1073	1043	1066	1063	56	7	-0.357	0
2616	11	8	10	PSA/PEA	PSA/PEA	1243	1193	1080	1078	73	163	1.575	0
2616	11	9	10	PSL1A	PSL1A	20616	23905	1115	1118	88	19501	258.943	0
2616	11	10	10	PSL1A	PSL1A	1286	2454	1130	1099	148	156	9.155	0
2616	11	11	10	PTL	PTL	1345	1282	1186	1182	57	159	1.754	0
2616	11	12	10	PTL	PTL	1323	1265	1198	1194	64	125	1.109	0
2616	11	1	11	RS-FUC	RS-FUC	568	506	1110	1129	439	-542	-1.419	0
2616	11	2	11	RS-FUC	RS-FUC	486	486	1087	1034	190	-601	-2.884	0
2616	11	3	11	SAMB	SAMB	9635	10674	1059	1053	88	8576	109.33	0
2616	11	4	11	SAMB	SAMB	9093	8945	1028	1039	116	8065	68.155	0
2616	11	5	11	SBA	SBA	329	408	1095	1095	102	-766	-6.735	0
2616	11	6	11	SBA	SBA	389	454	1108	1111	55	-719	-11.945	0
2616	11	7	11	SJA	SJA	682	679	1090	1088	51	-408	-8.02	0
2616	11	8	11	SJA	SJA	838	828	1089	1086	65	-251	-3.969	0
2616	11	9	11	SNA-I	SNA-I	1912	1901	1133	1139	68	779	11.206	0
2616	11	10	11	SNA-I	SNA-I	2619	2537	1141	1116	136	1478	10.449	0
2616	11	11	11	SNA-II	SNA-II	802	778	1202	1197	67	-400	-6.254	0
2616	11	12	11	SNA-II	SNA-II	994	963	1224	1219	66	-230	-3.879	0
2616	11	1	12	STL	STL	2255	2204	1129	1128	91	1126	11.824	0
2616	11	2	12	STL	STL	2150	2141	1110	1037	204	1040	5.412	0
2616	11	3	12	UDA	UDA	701	706	1059	1039	116	-358	-2.871	0
2616	11	4	12	UDA	UDA	687	697	1040	1038	68	-353	-5.015	0
2616	11	5	12	UEA I	UEA I	1232	1220	1109	1113	68	123	1.574	0
2616	11	6	12	UEA I	UEA I	1351	1275	1134	1139	58	217	2.345	0
2616	11	7	12	UEA-II	UEA-II	1149	1173	1112	1098	105	37	0.714	0
2616	11	8	12	UEA-II	UEA-II	1086	1097	1107	1101	52	-21	-0.077	0
2616	11	9	12	VFA	VFA	973	970	1148	1160	70	-175	-2.714	0
2616	11	10	12	VFA	VFA	981	976	1161	1142	223	-180	-0.744	0
2616	11	11	12	VVA	VVA	8247	8072	1232	1233	73	7015	93.685	0
2616	11	12	12	VVA	VVA	10355	10393	1241	1237	71	9114	128.958	0
2616	11	1	13	WFA	WFA	433	531	1153	1158	105	-720	-5.971	0
2616	11	2	13	WFA	WFA	490	552	1130	1103	128	-640	-4.305	0
2616	11	3	13	WGA	WGA	1030	1009	1124	1124	87	-94	-1.322	0
2616	11	4	13	WGA	WGA	1065	1057	1056	1039	102	9	0.176	0
2616	11	5	13	NEG	NEG	84	275	1101	1102	70	-1017	-11.814	0
2616	11	6	13	NEG	NEG	99	298	1172	1172	57	-1073	-15.333	0
2616	11	7	13	NEG	NEG	189	308	1143	1140	91	-954	-9.143	0
2616	11	8	13	NEG	NEG	191	307	1120	1115	64	-929	-12.625	0
2616	11	9	13	POS2	POS2	6334	6922	1155	1164	64	5179	89.969	0
2616	11	10	13	POS2	POS2	7904	7362	1165	1135	142	6739	43.852	0
2616	11	11	13	POS1	POS1	22247	19848	1211	1197	100	21036	186.51	0
2616	11	12	13	POS1	POS1	22590	19936	1201	1185	100	21389	187.51	0
3112	12	1	1	POS1	POS1	16402	13183	1642	1639	104	14760	111	0
3112	12	2	1	POS1	POS1	19038	15004	1635	1601	158	17403	84.829	0
3112	12	3	1	POS2	POS2	2373	3100	1637	1641	81	736	18.012	0
3112	12	4	1	POS2	POS2	2254	3427	1632	1642	94	622	18.989	0
3112	12	5	1	NEG	NEG	523	915	1646	1639	128	-1123	-5.656	0
3112	12	6	1	NEG	NEG	409	826	1590	1587	98	-1181	-7.765	0
3112	12	7	1	NEG	NEG	608	814	1735	1726	134	-1127	-6.806	0
3112	12	8	1	NEG	NEG	634	977	1714	1708	86	-1080	-8.5	0
3112	12	9	1	AAA	AAA	831	1009	1781	1796	121	-950	-6.504	0
3112	12	10	1	AAA	AAA	653	876	1847	1861	176	-1194	-5.597	0
3112	12	11	1	AAL	AAL	904	1159	1906	1917	109	-1002	-6.954	0
3112	12	12	1	AAL	AAL	1047	1270	1905	1905	169	-858	-3.757	0
3112	12	1	2	ACG	ACG	1562	1558	1624	1628	108	-62	-0.648	0
3112	12	2	2	ACG	ACG	1707	1671	1588	1560	166	119	0.669	0
3112	12	3	2	ACL	ACL	561	732	1608	1616	107	-1047	-8.262	0
3112	12	4	2	ACL	ACL	576	753	1602	1605	77	-1026	-11.065	0
3112	12	5	2	ASA	ASA	11971	10026	1649	1647	176	10322	47.608	0
3112	12	6	2	ASA	ASA	12272	10218	1587	1586	102	10685	84.627	0
3112	12	7	2	BANLEC	BANLEC	4238	3899	1766	1762	157	2472	13.611	0
3112	12	8	2	BANLEC	BANLEC	4067	3990	1740	1754	120	2327	18.633	0
3112	12	9	2	BC2L-A	BC2L-A	1815	1755	1781	1809	159	34	-0.34	0
3112	12	10	2	BC2L-A	BC2L-A	1745	1725	1855	1860	155	-110	-0.871	0
3112	12	11	2	BC2LCN	BC2LCN	1068	1108	1924	1940	127	-856	-6.551	0
3112	12	12	2	BC2LCN	BC2LCN	1177	1229	1930	1928	162	-753	-4.315	0
3112	12	1	3	BPA; BPL	BPA; BPL	889	924	1648	1647	116	-759	-6.233	0
3112	12	2	3	BPA; BPL	BPA; BPL	935	984	1600	1568	178	-665	-3.281	0
3112	12	3	3	CALSEPA	CALSEPA	4681	8345	1580	1584	109	3101	62.028	0
3112	12	4	3	CALSEPA	CALSEPA	5059	9318	1581	1583	84	3478	92.083	0
3112	12	5	3	CGL2	CGL2	1712	2961	1606	1623	169	106	7.917	0
3112	12	6	3	CGL2	CGL2	1958	3093	1543	1572	164	415	9.274	0
3112	12	7	3	CNL	CNL	1099	1065	1757	1759	140	-658	-4.957	0
3112	12	8	3	CNL	CNL	1166	1089	1756	1778	145	-590	-4.752	0
3112	12	9	3	Con A	Con A	1200	1271	1763	1774	167	-563	-3.012	0
3112	12	10	3	Con A	Con A	1275	1302	1802	1808	174	-527	-2.908	0
3112	12	11	3	DBA	DBA	1020	1225	1917	1923	87	-897	-8.023	0
3112	12	12	3	DBA	DBA	1191	1279	1891	1882	114	-700	-5.289	0
3112	12	1	4	DISCOIDIN I	DISCOIDIN I	272	525	1687	1694	144	-1415	-8.118	0
3112	12	2	4	DISCOIDIN I	DISCOIDIN I	311	471	1617	1583	186	-1306	-5.978	0
3112	12	3	4	DISCOIDIN II	DISCOIDIN II	497	611	1592	1605	109	-1095	-9.119	0
3112	12	4	4	DISCOIDIN II	DISCOIDIN II	621	727	1577	1590	112	-956	-7.705	0
3112	12	5	4	DSA	DSA	5864	5754	1520	1525	110	4344	38.445	0
3112	12	6	4	DSA	DSA	6111	6075	1482	1486	123	4629	37.309	0
3112	12	7	4	ECA	ECA	529	540	1688	1681	166	-1159	-6.873	0
3112	12	8	4	ECA	ECA	543	545	1817	1832	190	-1274	-6.774	0
3112	12	9	4	EEL	EEL	544	746	1755	1786	170	-1211	-6.118	0
3112	12	10	4	EEL	EEL	550	769	1814	1821	179	-1264	-5.877	0
3112	12	11	4	F17AG	F17AG	764	903	1883	1902	110	-1119	-9.082	0
3112	12	12	4	F17AG	F17AG	748	796	1851	1845	103	-1103	-10.184	0
3112	12	1	5	GAL1	GAL1	153	558	1749	1756	169	-1596	-7.089	0
3112	12	2	5	GAL1	GAL1	228	586	1675	1661	219	-1447	-4.909	0
3112	12	3	5	GAL1-S	GAL1-S	207	403	1634	1650	149	-1427	-8.369	0
3112	12	4	5	GAL1-S	GAL1-S	223	454	1534	1556	126	-1311	-8.746	0
3112	12	5	5	GAL2	GAL2	651	675	1487	1494	130	-836	-6.3	0
3112	12	6	5	GAL2	GAL2	681	680	1439	1423	209	-758	-3.555	0
3112	12	7	5	GAL3	GAL3	78	284	1686	1706	178	-1608	-7.989	0
3112	12	8	5	GAL3	GAL3	78	386	1872	1888	171	-1794	-8.784	0
3112	12	9	5	GAL3C-S	GAL3C-S	2437	2267	1781	1799	150	656	3.12	0
3112	12	10	5	GAL3C-S	GAL3C-S	1898	1904	1800	1803	134	98	0.754	0
3112	12	11	5	GAL7-S	GAL7-S	1437	1340	1851	1878	124	-414	-4.339	0
3112	12	12	5	GAL7-S	GAL7-S	1300	1219	1804	1794	92	-504	-6.25	0
3112	12	1	6	GAL9	GAL9	173	447	1682	1688	161	-1509	-7.708	0
3112	12	2	6	GAL9	GAL9	274	422	1615	1610	210	-1341	-5.657	0
3112	12	3	6	GNA	GNA	21305	22360	1504	1515	172	19801	121.192	0
3112	12	4	6	GNA	GNA	20378	20238	1420	1436	129	18958	145.752	0
3112	12	5	6	GRFT	GRFT	1786	6192	1380	1392	143	406	33.566	0
3112	12	6	6	GRFT	GRFT	3100	5810	1454	1472	153	1646	28.353	0
3112	12	7	6	GS-I;?GSL-I	GS-I;?GSL-I	1334	1278	1617	1637	184	-283	-1.951	0
3112	12	8	6	GS-I;?GSL-I	GS-I;?GSL-I	1669	1572	1846	1850	211	-177	-1.318	0
3112	12	9	6	GS-II; GSL-II	GS-II; GSL-II	486	604	1807	1834	179	-1321	-6.872	0
3112	12	10	6	GS-II; GSL-II	GS-II; GSL-II	859	927	1778	1780	136	-919	-6.272	0
3112	12	11	6	HHA; HHL	HHA; HHL	14474	12402	1769	1772	74	12705	143.649	0
3112	12	12	6	HHA; HHL	HHA; HHL	14462	12442	1741	1733	93	12721	115.151	0
3112	12	1	7	Jacalin	Jacalin	948	973	1702	1714	186	-754	-3.984	0
3112	12	2	7	Jacalin	Jacalin	941	998	1592	1588	229	-651	-2.576	0
3112	12	3	7	LBA	LBA	374	440	1512	1532	160	-1138	-6.825	0
3112	12	4	7	LBA	LBA	483	542	1335	1339	165	-852	-4.83	0
3112	12	5	7	LcH A	LcH A	813	847	1232	1237	127	-419	-3.071	0
3112	12	6	7	LcH A	LcH A	1083	1114	1395	1403	140	-312	-2.064	0
3112	12	7	7	LEA	LEA	863	908	1618	1622	159	-755	-4.491	0
3112	12	8	7	LEA	LEA	1008	1051	1783	1794	318	-775	-2.336	0
3112	12	9	7	LENTIL	LENTIL	1525	1550	1786	1787	160	-261	-1.481	0
3112	12	10	7	LENTIL	LENTIL	1681	1690	1687	1674	136	-6	0.118	0
3112	12	11	7	Lotus	Lotus	907	872	1646	1630	106	-739	-7.151	0
3112	12	12	7	Lotus	Lotus	908	855	1495	1454	200	-587	-2.995	0
3112	12	1	8	LSL-N	LSL-N	2094	2090	1711	1726	184	383	1.978	0
3112	12	2	8	LSL-N	LSL-N	1955	1955	1665	1639	239	290	1.322	0
3112	12	3	8	MAA; MAL	MAA; MAL	5960	5498	1652	1653	161	4308	23.882	0
3112	12	4	8	MAA; MAL	MAA; MAL	5344	4893	1416	1408	166	3928	20.994	0
3112	12	5	8	MALECTIN	MALECTIN	971	966	1429	1423	157	-458	-2.911	0
3112	12	6	8	MALECTIN	MALECTIN	674	783	1536	1554	141	-862	-5.468	0
3112	12	7	8	MOA	MOA	389	481	1609	1627	153	-1220	-7.49	0
3112	12	8	8	MOA	MOA	383	537	1657	1640	226	-1274	-4.881	0
3112	12	9	8	MPL; MPA	MPL; MPA	2468	2266	1809	1810	138	659	3.304	0
3112	12	10	8	MPL; MPA	MPL; MPA	2180	2015	1715	1703	154	465	2.026	0
3112	12	11	8	NPA	NPA	9546	8549	1712	1705	93	7834	73.591	0
3112	12	12	8	NPA	NPA	9620	8223	1705	1689	104	7915	62.827	0
3112	12	1	9	ORYSATA	ORYSATA	1228	1266	1850	1842	216	-622	-2.667	0
3112	12	2	9	ORYSATA	ORYSATA	1292	1276	1801	1776	238	-509	-2.101	0
3112	12	3	9	PA-IIL	PA-IIL	545	749	1741	1704	231	-1196	-4.134	0
3112	12	4	9	PA-IIL	PA-IIL	590	723	1490	1469	191	-900	-3.906	0
3112	12	5	9	PA-IL	PA-IL	423	425	1572	1581	136	-1149	-8.5	0
3112	12	6	9	PA-IL	PA-IL	401	419	1649	1669	134	-1248	-9.328	0
3112	12	7	9	PALa	PALa	1057	4296	1745	1759	177	-688	14.333	0
3112	12	8	9	PALa	PALa	979	2346	1699	1691	269	-720	2.435	0
3112	12	9	9	PHA-E	PHA-E	2934	2806	1879	1839	251	1055	3.853	0
3112	12	10	9	PHA-E	PHA-E	3187	3199	1910	1909	185	1277	6.973	0
3112	12	11	9	PHA-L	PHA-L	933	1041	1843	1846	82	-910	-9.817	0
3112	12	12	9	PHA-L	PHA-L	1427	1479	1840	1827	107	-413	-3.252	0
3112	12	1	10	PHA-P	PHA-P	1332	1328	1870	1865	195	-538	-2.754	0
3112	12	2	10	PHA-P	PHA-P	1519	1565	1902	1881	259	-383	-1.22	0
3112	12	3	10	PNA	PNA	664	776	1764	1766	197	-1100	-5.025	0
3112	12	4	10	PNA	PNA	565	687	1594	1620	137	-1029	-6.81	0
3112	12	5	10	PPL	PPL	1221	1096	1608	1622	146	-387	-3.603	0
3112	12	6	10	PPL	PPL	1284	1175	1689	1714	145	-405	-3.717	0
3112	12	7	10	PSA/PEA	PSA/PEA	1692	1666	1679	1679	151	13	-0.086	0
3112	12	8	10	PSA/PEA	PSA/PEA	1399	1412	1778	1792	139	-379	-2.734	0
3112	12	9	10	PSL1A	PSL1A	1582	4397	1934	1955	164	-352	14.89	0
3112	12	10	10	PSL1A	PSL1A	2016	4882	2018	2001	175	-2	16.463	0
3112	12	11	10	PTL	PTL	1928	1823	1818	1788	144	110	0.243	0
3112	12	12	10	PTL	PTL	1983	1920	1868	1855	103	115	0.631	0
3112	12	1	11	RS-FUC	RS-FUC	709	714	1876	1889	166	-1167	-7.078	0
3112	12	2	11	RS-FUC	RS-FUC	679	707	2022	1994	261	-1343	-4.931	0
3112	12	3	11	SAMB	SAMB	17980	16735	1866	1869	193	16114	77.026	0
3112	12	4	11	SAMB	SAMB	17301	18788	1678	1701	151	15623	113.159	0
3112	12	5	11	SBA	SBA	364	543	1684	1677	177	-1320	-6.407	0
3112	12	6	11	SBA	SBA	562	672	1751	1775	145	-1189	-7.607	0
3112	12	7	11	SJA	SJA	1105	1052	1689	1700	167	-584	-3.88	0
3112	12	8	11	SJA	SJA	1113	1098	1787	1801	166	-674	-4.235	0
3112	12	9	11	SNA-I	SNA-I	4548	4253	1867	1883	168	2681	14.107	0
3112	12	10	11	SNA-I	SNA-I	5499	5123	1968	1928	202	3531	15.817	0
3112	12	11	11	SNA-II	SNA-II	1066	1040	1817	1787	174	-751	-4.293	0
3112	12	12	11	SNA-II	SNA-II	1249	1265	1754	1754	155	-505	-3.155	0
3112	12	1	12	STL	STL	4168	4155	1905	1915	160	2263	14	0
3112	12	2	12	STL	STL	4117	4075	1994	1955	284	2123	7.465	0
3112	12	3	12	UDA	UDA	1238	1227	1929	1922	207	-691	-3.357	0
3112	12	4	12	UDA	UDA	910	949	1654	1671	154	-744	-4.688	0
3112	12	5	12	UEA I	UEA I	1401	1409	1722	1734	164	-321	-1.982	0
3112	12	6	12	UEA I	UEA I	1260	1275	1717	1736	138	-457	-3.341	0
3112	12	7	12	UEA-II	UEA-II	1577	1560	1699	1709	114	-122	-1.307	0
3112	12	8	12	UEA-II	UEA-II	1534	1563	1678	1697	140	-144	-0.957	0
3112	12	9	12	VFA	VFA	1614	1624	1793	1799	121	-179	-1.446	0
3112	12	10	12	VFA	VFA	1517	1483	1937	1915	168	-420	-2.571	0
3112	12	11	12	VVA	VVA	7334	7315	1922	1938	114	5412	47.167	0
3112	12	12	12	VVA	VVA	7632	7627	1616	1609	233	6016	25.828	0
3112	12	1	13	WFA	WFA	889	992	1982	1980	167	-1093	-5.916	0
3112	12	2	13	WFA	WFA	575	786	1908	1899	240	-1333	-4.637	0
3112	12	3	13	WGA	WGA	1823	1752	1985	2003	204	-162	-1.23	0
3112	12	4	13	WGA	WGA	1484	1411	1673	1694	150	-189	-1.887	0
3112	12	5	13	NEG	NEG	118	467	1670	1689	151	-1552	-8.093	0
3112	12	6	13	NEG	NEG	152	464	1696	1718	117	-1544	-10.718	0
3112	12	7	13	NEG	NEG	252	413	1715	1724	132	-1463	-9.932	0
3112	12	8	13	NEG	NEG	268	441	1786	1813	172	-1518	-7.977	0
3112	12	9	13	POS2	POS2	6925	6883	1799	1817	163	5126	31.08	0
3112	12	10	13	POS2	POS2	8183	7627	1965	1953	156	6218	36.372	0
3112	12	11	13	POS1	POS1	22427	19837	2061	2055	124	20366	143.403	0
3112	12	12	13	POS1	POS1	23192	21480	1792	1751	185	21400	106.643	0
2620	13	1	1	POS1	POS1	16128	12811	966	967	53	15162	223.472	0
2620	13	2	1	POS1	POS1	19193	15365	926	909	95	18267	152.168	0
2620	13	3	1	POS2	POS2	2323	2890	910	909	57	1413	34.754	0
2620	13	4	1	POS2	POS2	2303	3359	881	879	53	1422	46.792	0
2620	13	5	1	NEG	NEG	63	274	811	813	48	-748	-11.229	0
2620	13	6	1	NEG	NEG	95	289	771	781	67	-676	-7.343	0
2620	13	7	1	NEG	NEG	86	277	896	901	53	-810	-11.774	0
2620	13	8	1	NEG	NEG	112	324	934	933	60	-822	-10.15	0
2620	13	9	1	AAA	AAA	454	485	962	965	61	-508	-7.869	0
2620	13	10	1	AAA	AAA	443	467	971	948	106	-528	-4.538	0
2620	13	11	1	AAL	AAL	696	726	957	963	56	-261	-4.232	0
2620	13	12	1	AAL	AAL	696	745	959	967	82	-263	-2.707	0
2620	13	1	2	ACG	ACG	1151	1116	954	960	125	197	1.248	0
2620	13	2	2	ACG	ACG	1084	1023	898	882	97	186	1.454	0
2620	13	3	2	ACL	ACL	355	383	905	905	55	-550	-9.491	0
2620	13	4	2	ACL	ACL	323	371	852	863	214	-529	-2.299	0
2620	13	5	2	ASA	ASA	11683	9272	807	808	50	10876	169.28	0
2620	13	6	2	ASA	ASA	11906	9175	760	761	60	11146	140.233	0
2620	13	7	2	BANLEC	BANLEC	3589	3362	899	900	60	2690	41.033	0
2620	13	8	2	BANLEC	BANLEC	4937	3944	923	925	115	4014	26.252	0
2620	13	9	2	BC2L-A	BC2L-A	1060	1299	974	974	59	86	5.508	0
2620	13	10	2	BC2L-A	BC2L-A	1164	1289	964	947	108	200	3.167	0
2620	13	11	2	BC2LCN	BC2LCN	799	762	989	991	51	-190	-4.49	0
2620	13	12	2	BC2LCN	BC2LCN	709	678	957	958	58	-248	-4.828	0
2620	13	1	3	BPA; BPL	BPA; BPL	610	617	929	933	56	-319	-5.643	0
2620	13	2	3	BPA; BPL	BPA; BPL	641	640	859	850	111	-218	-1.892	0
2620	13	3	3	CALSEPA	CALSEPA	2290	4237	875	880	163	1415	20.595	0
2620	13	4	3	CALSEPA	CALSEPA	3111	4703	862	890	266	2249	14.335	0
2620	13	5	3	CGL2	CGL2	957	1557	821	824	52	136	14.096	0
2620	13	6	3	CGL2	CGL2	971	1675	779	785	66	192	13.485	0
2620	13	7	3	CNL	CNL	461	485	912	910	78	-451	-5.449	0
2620	13	8	3	CNL	CNL	438	388	891	909	354	-453	-1.472	0
2620	13	9	3	Con A	Con A	786	783	959	960	57	-173	-3.105	0
2620	13	10	3	Con A	Con A	842	808	959	948	102	-117	-1.373	0
2620	13	11	3	DBA	DBA	940	956	991	996	147	-51	-0.272	0
2620	13	12	3	DBA	DBA	964	979	956	958	62	8	0.339	0
2620	13	1	4	DISCOIDIN I	DISCOIDIN I	150	337	915	914	58	-765	-9.948	0
2620	13	2	4	DISCOIDIN I	DISCOIDIN I	217	337	845	835	97	-628	-5.134	0
2620	13	3	4	DISCOIDIN II	DISCOIDIN II	369	422	863	861	51	-494	-8.608	0
2620	13	4	4	DISCOIDIN II	DISCOIDIN II	344	402	855	855	59	-511	-7.678	0
2620	13	5	4	DSA	DSA	3149	3155	786	790	53	2363	44.623	0
2620	13	6	4	DSA	DSA	2912	3075	764	770	60	2148	38.417	0
2620	13	7	4	ECA	ECA	393	493	875	879	77	-482	-5.013	0
2620	13	8	4	ECA	ECA	398	441	915	915	79	-517	-6	0
2620	13	9	4	EEL	EEL	556	613	942	944	66	-386	-5.015	0
2620	13	10	4	EEL	EEL	534	568	927	909	114	-393	-2.991	0
2620	13	11	4	F17AG	F17AG	552	586	963	972	70	-411	-5.514	0
2620	13	12	4	F17AG	F17AG	520	556	906	901	80	-386	-4.312	0
2620	13	1	5	GAL1	GAL1	93	295	881	892	79	-788	-7.557	0
2620	13	2	5	GAL1	GAL1	102	290	867	861	87	-765	-6.563	0
2620	13	3	5	GAL1-S	GAL1-S	107	203	833	840	77	-726	-8.273	0
2620	13	4	5	GAL1-S	GAL1-S	129	216	773	754	102	-644	-5.275	0
2620	13	5	5	GAL2	GAL2	348	361	722	719	66	-374	-5.424	0
2620	13	6	5	GAL2	GAL2	434	406	760	769	70	-326	-5.186	0
2620	13	7	5	GAL3	GAL3	81	167	846	856	74	-765	-9.311	0
2620	13	8	5	GAL3	GAL3	74	169	879	874	236	-805	-2.987	0
2620	13	9	5	GAL3C-S	GAL3C-S	1000	1000	919	926	83	81	0.892	0
2620	13	10	5	GAL3C-S	GAL3C-S	1050	1030	928	914	113	122	1.027	0
2620	13	11	5	GAL7-S	GAL7-S	600	567	897	893	92	-297	-3.543	0
2620	13	12	5	GAL7-S	GAL7-S	532	574	886	877	73	-354	-4.151	0
2620	13	1	6	GAL9	GAL9	101	228	834	843	71	-733	-8.662	0
2620	13	2	6	GAL9	GAL9	153	243	796	797	95	-643	-5.832	0
2620	13	3	6	GNA	GNA	21941	23138	721	719	87	21220	257.69	0
2620	13	4	6	GNA	GNA	19819	21043	498	514	73	19321	281.219	0
2620	13	5	6	GRFT	GRFT	743	5168	581	588	90	162	50.889	0
2620	13	6	6	GRFT	GRFT	662	5136	773	777	89	-111	48.978	0
2620	13	7	6	GS-I;?GSL-I	GS-I;?GSL-I	743	738	821	851	837	-78	-0.135	0
2620	13	8	6	GS-I;?GSL-I	GS-I;?GSL-I	696	667	871	870	70	-175	-2.9	0
2620	13	9	6	GS-II; GSL-II	GS-II; GSL-II	393	456	893	899	57	-500	-7.772	0
2620	13	10	6	GS-II; GSL-II	GS-II; GSL-II	429	500	921	907	111	-492	-3.667	0
2620	13	11	6	HHA; HHL	HHA; HHL	15088	12435	866	866	66	14222	175.288	0
2620	13	12	6	HHA; HHL	HHA; HHL	13769	11418	867	871	60	12902	175.783	0
2620	13	1	7	Jacalin	Jacalin	586	619	892	902	85	-306	-3.329	0
2620	13	2	7	Jacalin	Jacalin	654	672	814	809	96	-160	-1.427	0
2620	13	3	7	LBA	LBA	316	306	740	739	101	-424	-4.287	0
2620	13	4	7	LBA	LBA	435	460	499	512	74	-64	-0.703	0
2620	13	5	7	LcH A	LcH A	483	517	543	554	83	-60	-0.446	0
2620	13	6	7	LcH A	LcH A	573	604	725	732	73	-152	-1.753	0
2620	13	7	7	LEA	LEA	606	615	771	770	98	-165	-1.582	0
2620	13	8	7	LEA	LEA	653	678	851	850	87	-198	-1.977	0
2620	13	9	7	LENTIL	LENTIL	824	835	849	852	84	-25	-0.202	0
2620	13	10	7	LENTIL	LENTIL	1000	1022	817	801	98	183	2.255	0
2620	13	11	7	Lotus	Lotus	530	516	782	786	97	-252	-2.784	0
2620	13	12	7	Lotus	Lotus	539	520	746	747	95	-207	-2.389	0
2620	13	1	8	LSL-N	LSL-N	1377	1287	929	943	82	448	4.195	0
2620	13	2	8	LSL-N	LSL-N	1413	1316	873	866	128	540	3.516	0
2620	13	3	8	MAA; MAL	MAA; MAL	3336	3046	822	826	91	2514	24.396	0
2620	13	4	8	MAA; MAL	MAA; MAL	3198	2851	669	664	110	2529	19.882	0
2620	13	5	8	MALECTIN	MALECTIN	563	569	762	763	95	-199	-2.042	0
2620	13	6	8	MALECTIN	MALECTIN	605	596	799	808	80	-194	-2.65	0
2620	13	7	8	MOA	MOA	308	387	819	823	94	-511	-4.638	0
2620	13	8	8	MOA	MOA	341	436	836	840	88	-495	-4.591	0
2620	13	9	8	MPL; MPA	MPL; MPA	1087	1028	848	845	79	239	2.316	0
2620	13	10	8	MPL; MPA	MPL; MPA	1266	1140	808	793	90	458	3.856	0
2620	13	11	8	NPA	NPA	7874	7166	839	840	80	7035	79.075	0
2620	13	12	8	NPA	NPA	9106	8284	838	876	157	8268	47.185	0
2620	13	1	9	ORYSATA	ORYSATA	795	798	1000	1008	71	-205	-2.958	0
2620	13	2	9	ORYSATA	ORYSATA	780	829	966	963	113	-186	-1.186	0
2620	13	3	9	PA-IIL	PA-IIL	279	500	867	863	119	-588	-3.05	0
2620	13	4	9	PA-IIL	PA-IIL	250	448	763	766	99	-513	-3.212	0
2620	13	5	9	PA-IL	PA-IL	285	285	854	865	87	-569	-6.667	0
2620	13	6	9	PA-IL	PA-IL	276	277	887	893	93	-611	-6.624	0
2620	13	7	9	PALa	PALa	640	1555	919	915	123	-279	5.203	0
2620	13	8	9	PALa	PALa	587	2401	927	936	76	-340	19.276	0
2620	13	9	9	PHA-E	PHA-E	1700	1702	942	991	877	758	0.811	0
2620	13	10	9	PHA-E	PHA-E	2058	2074	864	848	99	1194	12.384	0
2620	13	11	9	PHA-L	PHA-L	809	819	949	953	265	-140	-0.506	0
2620	13	12	9	PHA-L	PHA-L	726	734	942	942	63	-216	-3.302	0
2620	13	1	10	PHA-P	PHA-P	773	792	1028	1034	100	-255	-2.42	0
2620	13	2	10	PHA-P	PHA-P	732	733	975	975	114	-243	-2.123	0
2620	13	3	10	PNA	PNA	438	458	904	916	91	-466	-5.033	0
2620	13	4	10	PNA	PNA	380	404	823	833	81	-443	-5.296	0
2620	13	5	10	PPL	PPL	689	638	894	902	98	-205	-2.694	0
2620	13	6	10	PPL	PPL	772	726	957	967	79	-185	-3.051	0
2620	13	7	10	PSA/PEA	PSA/PEA	837	890	964	983	237	-127	-0.392	0
2620	13	8	10	PSA/PEA	PSA/PEA	1067	1066	952	965	226	115	0.447	0
2620	13	9	10	PSL1A	PSL1A	937	1957	979	982	64	-42	15.234	0
2620	13	10	10	PSL1A	PSL1A	1187	2388	945	926	109	242	13.413	0
2620	13	11	10	PTL	PTL	1136	1087	977	979	50	159	2.16	0
2620	13	12	10	PTL	PTL	1159	1145	974	971	73	185	2.384	0
2620	13	1	11	RS-FUC	RS-FUC	513	470	1107	1111	110	-594	-5.827	0
2620	13	2	11	RS-FUC	RS-FUC	213	278	1030	1024	117	-817	-6.376	0
2620	13	3	11	SAMB	SAMB	10386	11621	949	960	126	9437	84.611	0
2620	13	4	11	SAMB	SAMB	9582	11721	860	871	91	8722	119.231	0
2620	13	5	11	SBA	SBA	296	388	916	899	168	-620	-3.042	0
2620	13	6	11	SBA	SBA	629	633	987	1000	106	-358	-3.462	0
2620	13	7	11	SJA	SJA	611	627	1003	1016	99	-392	-3.929	0
[truncated: 185 more rows]

## Sheet: lectin microarray 3
Sample Name	Block	Column	Row	Name	ID	F532 Median	F532 Mean	B532 Median	B532 Mean	B532 SD	F532 Median - B532	SNR 532	Flags
2623	1	1	1	POS1	POS1	15725	12520	951	942	67	14774	172.806	0
2623	1	2	1	POS1	POS1	18714	14489	971	1023	747	17743	18.027	0
2623	1	3	1	POS2	POS2	2338	2759	965	955	76	1373	23.737	0
2623	1	4	1	POS2	POS2	2318	3266	1001	997	57	1317	39.807	0
2623	1	5	1	NEG	NEG	126	432	982	966	80	-856	-6.675	0
2623	1	6	1	NEG	NEG	167	551	1030	1029	90	-863	-5.311	0
2623	1	7	1	NEG	NEG	173	513	1076	1082	168	-903	-3.387	0
2623	1	8	1	NEG	NEG	200	530	1060	1067	114	-860	-4.711	0
2623	1	9	1	AAA	AAA	837	848	1064	1068	269	-227	-0.818	0
2623	1	10	1	AAA	AAA	923	931	1076	1068	64	-153	-2.141	0
2623	1	11	1	AAL	AAL	914	890	1091	1085	68	-177	-2.868	0
2623	1	12	1	AAL	AAL	971	964	1133	1129	73	-162	-2.26	0
2623	1	1	2	ACG	ACG	991	983	959	954	63	32	0.46	0
2623	1	2	2	ACG	ACG	1071	1019	958	977	141	113	0.298	0
2623	1	3	2	ACL	ACL	461	495	970	956	84	-509	-5.488	0
2623	1	4	2	ACL	ACL	524	560	1016	1018	47	-492	-9.745	0
2623	1	5	2	ASA	ASA	3091	3565	980	966	96	2111	27.073	0
2623	1	6	2	ASA	ASA	3674	4150	1040	1045	108	2634	28.75	0
2623	1	7	2	BANLEC	BANLEC	4221	4076	1069	1063	102	3152	29.539	0
2623	1	8	2	BANLEC	BANLEC	4730	5596	1069	1073	95	3661	47.611	0
2623	1	9	2	BC2L-A	BC2L-A	920	966	1082	1094	188	-162	-0.681	0
2623	1	10	2	BC2L-A	BC2L-A	987	1026	1083	1073	78	-96	-0.603	0
2623	1	11	2	BC2LCN	BC2LCN	842	837	1110	1108	59	-268	-4.593	0
2623	1	12	2	BC2LCN	BC2LCN	862	875	1114	1117	192	-252	-1.26	0
2623	1	1	3	BPA; BPL	BPA; BPL	825	849	963	955	61	-138	-1.738	0
2623	1	2	3	BPA; BPL	BPA; BPL	790	799	953	949	55	-163	-2.727	0
2623	1	3	3	CALSEPA	CALSEPA	2570	4155	956	964	302	1614	10.566	0
2623	1	4	3	CALSEPA	CALSEPA	2877	4644	959	963	58	1918	63.466	0
2623	1	5	3	CGL2	CGL2	1119	1425	976	964	85	143	5.424	0
2623	1	6	3	CGL2	CGL2	1313	1563	1022	1014	63	291	8.714	0
2623	1	7	3	CNL	CNL	691	721	1070	1064	84	-379	-4.083	0
2623	1	8	3	CNL	CNL	740	664	1048	1045	51	-308	-7.471	0
2623	1	9	3	Con A	Con A	1458	1415	1071	1078	89	387	3.787	0
2623	1	10	3	Con A	Con A	1319	1313	1097	1096	64	222	3.391	0
2623	1	11	3	DBA	DBA	933	966	1112	1110	57	-179	-2.526	0
2623	1	12	3	DBA	DBA	944	975	1122	1119	58	-178	-2.483	0
2623	1	1	4	DISCOIDIN I	DISCOIDIN I	376	431	937	932	58	-561	-8.638	0
2623	1	2	4	DISCOIDIN I	DISCOIDIN I	345	407	909	907	52	-564	-9.615	0
2623	1	3	4	DISCOIDIN II	DISCOIDIN II	544	558	927	928	89	-383	-4.157	0
2623	1	4	4	DISCOIDIN II	DISCOIDIN II	524	563	922	922	44	-398	-8.159	0
2623	1	5	4	DSA	DSA	2283	2255	934	926	81	1349	16.407	0
2623	1	6	4	DSA	DSA	1878	1770	980	973	76	898	10.487	0
2623	1	7	4	ECA	ECA	719	723	1044	1041	267	-325	-1.191	0
2623	1	8	4	ECA	ECA	719	737	1019	1001	86	-300	-3.07	0
2623	1	9	4	EEL	EEL	990	1005	1033	1036	69	-43	-0.449	0
2623	1	10	4	EEL	EEL	1083	1077	1086	1082	68	-3	-0.074	0
2623	1	11	4	F17AG	F17AG	755	771	1092	1087	59	-337	-5.356	0
2623	1	12	4	F17AG	F17AG	792	803	1129	1125	68	-337	-4.735	0
2623	1	1	5	GAL1	GAL1	222	374	932	936	80	-710	-7.025	0
2623	1	2	5	GAL1	GAL1	151	318	891	890	49	-740	-11.673	0
2623	1	3	5	GAL1-S	GAL1-S	180	252	878	866	78	-698	-7.872	0
2623	1	4	5	GAL1-S	GAL1-S	212	276	872	846	125	-660	-4.56	0
2623	1	5	5	GAL2	GAL2	607	606	839	842	93	-232	-2.538	0
2623	1	6	5	GAL2	GAL2	676	668	968	964	61	-292	-4.852	0
2623	1	7	5	GAL3	GAL3	126	296	1022	1017	235	-896	-3.068	0
2623	1	8	5	GAL3	GAL3	123	262	1012	1007	60	-889	-12.417	0
2623	1	9	5	GAL3C-S	GAL3C-S	1028	1029	1026	1022	51	2	0.137	0
2623	1	10	5	GAL3C-S	GAL3C-S	1100	1127	1056	1051	72	44	1.056	0
2623	1	11	5	GAL7-S	GAL7-S	606	641	1086	1084	57	-480	-7.772	0
2623	1	12	5	GAL7-S	GAL7-S	519	533	1111	1106	59	-592	-9.712	0
2623	1	1	6	GAL9	GAL9	332	437	918	910	70	-586	-6.757	0
2623	1	2	6	GAL9	GAL9	280	341	903	906	64	-623	-8.828	0
2623	1	3	6	GNA	GNA	15251	15228	848	841	77	14403	186.844	0
2623	1	4	6	GNA	GNA	14280	13024	648	688	170	13632	72.565	0
2623	1	5	6	GRFT	GRFT	763	3651	706	713	130	57	22.6	0
2623	1	6	6	GRFT	GRFT	1272	4332	921	914	71	351	48.141	0
2623	1	7	6	GS-I;?GSL-I	GS-I;?GSL-I	907	946	1007	1000	62	-100	-0.871	0
2623	1	8	6	GS-I;?GSL-I	GS-I;?GSL-I	906	941	1010	1008	56	-104	-1.196	0
2623	1	9	6	GS-II; GSL-II	GS-II; GSL-II	633	658	1021	1017	57	-388	-6.298	0
2623	1	10	6	GS-II; GSL-II	GS-II; GSL-II	673	713	1046	1046	67	-373	-4.97	0
2623	1	11	6	HHA; HHL	HHA; HHL	10344	8901	1075	1072	62	9269	126.274	0
2623	1	12	6	HHA; HHL	HHA; HHL	10970	9405	1079	1074	57	9891	146.158	0
2623	1	1	7	Jacalin	Jacalin	960	963	919	898	98	41	0.663	0
2623	1	2	7	Jacalin	Jacalin	791	798	931	928	60	-140	-2.167	0
2623	1	3	7	LBA	LBA	786	794	907	888	114	-121	-0.825	0
2623	1	4	7	LBA	LBA	664	650	768	761	162	-104	-0.685	0
2623	1	5	7	LcH A	LcH A	822	887	793	769	133	29	0.887	0
2623	1	6	7	LcH A	LcH A	919	960	909	905	67	10	0.821	0
2623	1	7	7	LEA	LEA	984	985	987	986	64	-3	-0.016	0
2623	1	8	7	LEA	LEA	984	986	986	979	83	-2	0.084	0
2623	1	9	7	LENTIL	LENTIL	938	936	992	985	61	-54	-0.803	0
2623	1	10	7	LENTIL	LENTIL	1009	995	1023	1023	230	-14	-0.122	0
2623	1	11	7	Lotus	Lotus	694	693	1042	1042	82	-348	-4.256	0
2623	1	12	7	Lotus	Lotus	657	665	1036	1033	87	-379	-4.23	0
2623	1	1	8	LSL-N	LSL-N	1207	1231	952	947	74	255	3.838	0
2623	1	2	8	LSL-N	LSL-N	1146	1180	941	933	283	205	0.873	0
2623	1	3	8	MAA; MAL	MAA; MAL	3155	2850	932	916	93	2223	20.796	0
2623	1	4	8	MAA; MAL	MAA; MAL	3380	2916	937	936	87	2443	22.759	0
2623	1	5	8	MALECTIN	MALECTIN	772	797	925	918	91	-153	-1.33	0
2623	1	6	8	MALECTIN	MALECTIN	871	882	975	977	149	-104	-0.638	0
2623	1	7	8	MOA	MOA	679	744	981	980	58	-302	-4.069	0
2623	1	8	8	MOA	MOA	696	792	981	974	80	-285	-2.275	0
2623	1	9	8	MPL; MPA	MPL; MPA	1177	1216	1004	1001	69	173	3.116	0
2623	1	10	8	MPL; MPA	MPL; MPA	1145	1193	998	993	81	147	2.469	0
2623	1	11	8	NPA	NPA	4899	4405	1053	1050	87	3846	38.563	0
2623	1	12	8	NPA	NPA	5012	4640	1090	1071	101	3922	35.337	0
2623	1	1	9	ORYSATA	ORYSATA	726	672	931	928	190	-205	-1.347	0
2623	1	2	9	ORYSATA	ORYSATA	673	682	945	942	57	-272	-4.561	0
2623	1	3	9	PA-IIL	PA-IIL	558	567	933	915	88	-375	-3.955	0
2623	1	4	9	PA-IIL	PA-IIL	460	538	961	971	345	-501	-1.255	0
2623	1	5	9	PA-IL	PA-IL	661	627	958	944	81	-297	-3.914	0
2623	1	6	9	PA-IL	PA-IL	697	661	1014	1010	57	-317	-6.123	0
2623	1	7	9	PALa	PALa	651	877	1035	1036	56	-384	-2.839	0
2623	1	8	9	PALa	PALa	559	832	1004	1001	68	-445	-2.485	0
2623	1	9	9	PHA-E	PHA-E	4648	4313	1032	1029	51	3616	64.392	0
2623	1	10	9	PHA-E	PHA-E	4241	4170	1051	1043	70	3190	44.671	0
2623	1	11	9	PHA-L	PHA-L	928	973	1108	1103	100	-180	-1.3	0
2623	1	12	9	PHA-L	PHA-L	1186	1225	1129	1124	108	57	0.935	0
2623	1	1	10	PHA-P	PHA-P	841	833	853	848	70	-12	-0.214	0
2623	1	2	10	PHA-P	PHA-P	814	809	902	905	211	-88	-0.455	0
2623	1	3	10	PNA	PNA	716	751	917	894	99	-201	-1.444	0
2623	1	4	10	PNA	PNA	728	769	962	955	65	-234	-2.862	0
2623	1	5	10	PPL	PPL	849	822	979	968	72	-130	-2.028	0
2623	1	6	10	PPL	PPL	866	837	1026	1020	77	-160	-2.377	0
2623	1	7	10	PSA/PEA	PSA/PEA	1120	1119	1054	1049	52	66	1.346	0
2623	1	8	10	PSA/PEA	PSA/PEA	1107	1122	1038	1030	73	69	1.26	0
2623	1	9	10	PSL1A	PSL1A	2206	3027	1053	1051	59	1153	33.492	0
2623	1	10	10	PSL1A	PSL1A	3163	3617	1054	1049	57	2109	45.053	0
2623	1	11	10	PTL	PTL	1185	1197	1099	1091	63	86	1.683	0
2623	1	12	10	PTL	PTL	1194	1209	1114	1097	91	80	1.231	0
2623	1	1	11	RS-FUC	RS-FUC	607	557	836	829	56	-229	-4.857	0
2623	1	2	11	RS-FUC	RS-FUC	714	631	845	841	42	-131	-5	0
2623	1	3	11	SAMB	SAMB	11850	11103	862	873	504	10988	20.298	0
2623	1	4	11	SAMB	SAMB	11130	10761	925	923	53	10205	185.623	0
2623	1	5	11	SBA	SBA	518	606	959	949	67	-441	-5.119	0
2623	1	6	11	SBA	SBA	578	630	1010	1004	60	-432	-6.233	0
2623	1	7	11	SJA	SJA	975	883	1052	1035	133	-77	-1.143	0
2623	1	8	11	SJA	SJA	976	901	1038	1018	105	-62	-1.114	0
2623	1	9	11	SNA-I	SNA-I	3100	2963	1072	1064	63	2028	30.143	0
2623	1	10	11	SNA-I	SNA-I	4758	4343	1090	1087	83	3668	39.229	0
2623	1	11	11	SNA-II	SNA-II	1018	1037	1105	1094	79	-87	-0.722	0
2623	1	12	11	SNA-II	SNA-II	954	943	1108	1093	94	-154	-1.596	0
2623	1	1	12	STL	STL	2010	1982	905	903	62	1105	17.403	0
2623	1	2	12	STL	STL	1805	1835	894	892	52	911	18.135	0
2623	1	3	12	UDA	UDA	737	739	861	851	76	-124	-1.474	0
2623	1	4	12	UDA	UDA	720	715	883	883	41	-163	-4.098	0
2623	1	5	12	UEA I	UEA I	1050	1069	917	912	71	133	2.211	0
2623	1	6	12	UEA I	UEA I	1215	1260	998	993	67	217	3.985	0
2623	1	7	12	UEA-II	UEA-II	953	962	1034	1034	76	-81	-0.947	0
2623	1	8	12	UEA-II	UEA-II	969	987	1056	1057	162	-87	-0.432	0
2623	1	9	12	VFA	VFA	1152	1168	1123	1166	200	29	0.01	0
2623	1	10	12	VFA	VFA	979	985	1084	1078	73	-105	-1.274	0
2623	1	11	12	VVA	VVA	6702	6459	1137	1132	58	5565	91.845	0
2623	1	12	12	VVA	VVA	10373	9533	1143	1143	65	9230	129.077	0
2623	1	1	13	WFA	WFA	675	709	978	974	68	-303	-3.897	0
2623	1	2	13	WFA	WFA	593	668	942	941	58	-349	-4.707	0
2623	1	3	13	WGA	WGA	1011	1031	931	914	110	80	1.064	0
2623	1	4	13	WGA	WGA	946	986	896	895	47	50	1.936	0
2623	1	5	13	NEG	NEG	110	231	897	885	68	-787	-9.618	0
2623	1	6	13	NEG	NEG	123	259	955	950	53	-832	-13.038	0
2623	1	7	13	NEG	NEG	215	270	1007	1001	52	-792	-14.058	0
2623	1	8	13	NEG	NEG	254	335	1033	1029	68	-779	-10.206	0
2623	1	9	13	POS2	POS2	6366	6406	1072	1068	63	5294	84.73	0
2623	1	10	13	POS2	POS2	8583	7406	1077	1074	163	7506	38.847	0
2623	1	11	13	POS1	POS1	21246	20372	1122	1120	59	20124	326.305	0
2623	1	12	13	POS1	POS1	23636	21923	1133	1127	64	22503	324.938	0
3114	2	1	1	POS1	POS1	14421	10955	1175	1177	93	13246	105.14	0
3114	2	2	1	POS1	POS1	16961	13149	1177	1157	95	15784	126.232	0
3114	2	3	1	POS2	POS2	2099	2537	1164	1164	55	935	24.964	0
3114	2	4	1	POS2	POS2	2135	2861	1109	1091	76	1026	23.289	0
3114	2	5	1	NEG	NEG	111	296	1075	1078	156	-964	-5.013	0
3114	2	6	1	NEG	NEG	121	316	1181	1181	43	-1060	-20.116	0
3114	2	7	1	NEG	NEG	125	419	1238	1209	131	-1113	-6.031	0
3114	2	8	1	NEG	NEG	137	450	1268	1233	268	-1131	-2.922	0
3114	2	9	1	AAA	AAA	938	970	1306	1303	79	-368	-4.215	0
3114	2	10	1	AAA	AAA	1027	1065	1344	1337	65	-317	-4.185	0
3114	2	11	1	AAL	AAL	1086	1109	1109	1097	227	-23	0.053	0
3114	2	12	1	AAL	AAL	1192	1193	1422	1398	119	-230	-1.723	0
3114	2	1	2	ACG	ACG	1305	1300	1152	1150	48	153	3.125	0
3114	2	2	2	ACG	ACG	1334	1276	1153	1133	95	181	1.505	0
3114	2	3	2	ACL	ACL	590	621	1135	1132	53	-545	-9.642	0
3114	2	4	2	ACL	ACL	592	619	1086	1071	82	-494	-5.512	0
3114	2	5	2	ASA	ASA	4031	4394	1059	1061	61	2972	54.639	0
3114	2	6	2	ASA	ASA	7656	6433	1177	1180	45	6479	116.733	0
3114	2	7	2	BANLEC	BANLEC	11655	9677	1250	1225	128	10405	66.031	0
3114	2	8	2	BANLEC	BANLEC	12694	10388	1282	1242	136	11412	67.25	0
3114	2	9	2	BC2L-A	BC2L-A	1230	1434	1308	1304	56	-78	2.321	0
3114	2	10	2	BC2L-A	BC2L-A	1258	1458	1319	1320	50	-61	2.76	0
3114	2	11	2	BC2LCN	BC2LCN	971	995	1317	1267	176	-346	-1.545	0
3114	2	12	2	BC2LCN	BC2LCN	927	919	1343	1317	118	-416	-3.373	0
3114	2	1	3	BPA; BPL	BPA; BPL	841	842	1142	1141	51	-301	-5.863	0
3114	2	2	3	BPA; BPL	BPA; BPL	783	791	1121	1109	260	-338	-1.223	0
3114	2	3	3	CALSEPA	CALSEPA	3182	5025	1120	1133	192	2062	20.271	0
3114	2	4	3	CALSEPA	CALSEPA	3726	5535	1069	1067	178	2657	25.101	0
3114	2	5	3	CGL2	CGL2	1069	1389	1038	1039	43	31	8.14	0
3114	2	6	3	CGL2	CGL2	1119	1528	1142	1142	53	-23	7.283	0
3114	2	7	3	CNL	CNL	926	762	1234	1230	72	-308	-6.5	0
3114	2	8	3	CNL	CNL	883	771	1270	1241	118	-387	-3.983	0
3114	2	9	3	Con A	Con A	1297	1309	1288	1285	84	9	0.286	0
3114	2	10	3	Con A	Con A	1453	1443	1302	1300	61	151	2.344	0
3114	2	11	3	DBA	DBA	952	994	1332	1299	150	-380	-2.033	0
3114	2	12	3	DBA	DBA	962	1015	1331	1311	111	-369	-2.667	0
3114	2	1	4	DISCOIDIN I	DISCOIDIN I	348	442	1158	1167	99	-810	-7.323	0
3114	2	2	4	DISCOIDIN I	DISCOIDIN I	343	408	1093	1082	96	-750	-7.021	0
3114	2	3	4	DISCOIDIN II	DISCOIDIN II	693	689	1074	1074	42	-381	-9.167	0
3114	2	4	4	DISCOIDIN II	DISCOIDIN II	533	567	1032	1022	79	-499	-5.759	0
3114	2	5	4	DSA	DSA	2582	2425	1012	1013	50	1570	28.24	0
3114	2	6	4	DSA	DSA	2506	2369	1137	1135	54	1369	22.852	0
3114	2	7	4	ECA	ECA	691	698	1202	1172	155	-511	-3.058	0
3114	2	8	4	ECA	ECA	717	724	1254	1223	123	-537	-4.057	0
3114	2	9	4	EEL	EEL	751	773	1263	1259	55	-512	-8.836	0
3114	2	10	4	EEL	EEL	787	803	1285	1286	42	-498	-11.5	0
3114	2	11	4	F17AG	F17AG	999	1009	1287	1250	148	-288	-1.628	0
3114	2	12	4	F17AG	F17AG	869	846	1254	1235	113	-385	-3.442	0
3114	2	1	5	GAL1	GAL1	230	412	1140	1166	121	-910	-6.231	0
3114	2	2	5	GAL1	GAL1	158	373	1118	1131	132	-960	-5.742	0
3114	2	3	5	GAL1-S	GAL1-S	201	300	1071	1080	103	-870	-7.573	0
3114	2	4	5	GAL1-S	GAL1-S	237	285	965	954	67	-728	-9.985	0
3114	2	5	5	GAL2	GAL2	622	618	982	982	56	-360	-6.5	0
3114	2	6	5	GAL2	GAL2	797	762	1122	1122	47	-325	-7.66	0
3114	2	7	5	GAL3	GAL3	140	268	1209	1198	123	-1069	-7.561	0
3114	2	8	5	GAL3	GAL3	150	270	1221	1197	112	-1071	-8.277	0
3114	2	9	5	GAL3C-S	GAL3C-S	1221	1230	1222	1220	58	-1	0.172	0
3114	2	10	5	GAL3C-S	GAL3C-S	1298	1312	1248	1248	43	50	1.488	0
3114	2	11	5	GAL7-S	GAL7-S	959	953	1257	1215	159	-298	-1.648	0
3114	2	12	5	GAL7-S	GAL7-S	739	795	1255	1234	110	-516	-3.991	0
3114	2	1	6	GAL9	GAL9	244	320	1074	1101	123	-830	-6.35	0
3114	2	2	6	GAL9	GAL9	265	384	1121	1139	143	-856	-5.28	0
3114	2	3	6	GNA	GNA	24565	24073	1042	1057	118	23523	195.051	0
3114	2	4	6	GNA	GNA	21967	21473	913	904	72	21054	285.681	0
3114	2	5	6	GRFT	GRFT	1040	6292	977	973	51	63	104.294	0
3114	2	6	6	GRFT	GRFT	4007	7510	1101	1100	53	2906	120.943	0
3114	2	7	6	GS-I;?GSL-I	GS-I;?GSL-I	1174	1204	1176	1152	113	-2	0.46	0
3114	2	8	6	GS-I;?GSL-I	GS-I;?GSL-I	1089	1122	1189	1159	114	-100	-0.325	0
3114	2	9	6	GS-II; GSL-II	GS-II; GSL-II	618	657	1211	1207	54	-593	-10.185	0
3114	2	10	6	GS-II; GSL-II	GS-II; GSL-II	546	653	1231	1230	44	-685	-13.114	0
3114	2	11	6	HHA; HHL	HHA; HHL	13555	11506	1229	1191	148	12326	69.696	0
3114	2	12	6	HHA; HHL	HHA; HHL	14885	12435	1215	1193	117	13670	96.085	0
3114	2	1	7	Jacalin	Jacalin	883	897	1020	1027	76	-137	-1.711	0
3114	2	2	7	Jacalin	Jacalin	877	866	1039	1041	124	-162	-1.411	0
3114	2	3	7	LBA	LBA	559	552	990	997	83	-431	-5.361	0
3114	2	4	7	LBA	LBA	688	728	892	883	64	-204	-2.422	0
3114	2	5	7	LcH A	LcH A	1054	1103	968	965	49	86	2.816	0
3114	2	6	7	LcH A	LcH A	1164	1217	1051	1050	42	113	3.976	0
3114	2	7	7	LEA	LEA	1016	1035	1122	1111	93	-106	-0.817	0
3114	2	8	7	LEA	LEA	1058	1081	1155	1128	109	-97	-0.431	0
3114	2	9	7	LENTIL	LENTIL	1181	1226	1151	1148	53	30	1.472	0
3114	2	10	7	LENTIL	LENTIL	1239	1278	1150	1156	84	89	1.452	0
3114	2	11	7	Lotus	Lotus	678	650	1133	1097	141	-455	-3.17	0
3114	2	12	7	Lotus	Lotus	588	565	1129	1098	114	-541	-4.675	0
3114	2	1	8	LSL-N	LSL-N	1291	1309	1026	1030	53	265	5.264	0
3114	2	2	8	LSL-N	LSL-N	1128	1161	1041	1040	105	87	1.152	0
3114	2	3	8	MAA; MAL	MAA; MAL	4189	3690	1000	1002	74	3189	36.324	0
3114	2	4	8	MAA; MAL	MAA; MAL	5106	4468	920	921	92	4186	38.554	0
3114	2	5	8	MALECTIN	MALECTIN	925	943	1034	1036	54	-109	-1.722	0
3114	2	6	8	MALECTIN	MALECTIN	821	867	1078	1072	79	-257	-2.595	0
3114	2	7	8	MOA	MOA	505	546	1091	1075	104	-586	-5.087	0
3114	2	8	8	MOA	MOA	479	565	1127	1098	112	-648	-4.759	0
3114	2	9	8	MPL; MPA	MPL; MPA	1414	1393	1126	1126	62	288	4.306	0
3114	2	10	8	MPL; MPA	MPL; MPA	1446	1457	1141	1143	64	305	4.906	0
3114	2	11	8	NPA	NPA	7270	6338	1154	1128	139	6116	37.482	0
3114	2	12	8	NPA	NPA	6917	5964	1203	1172	126	5714	38.032	0
3114	2	1	9	ORYSATA	ORYSATA	790	787	1037	1036	46	-247	-5.413	0
3114	2	2	9	ORYSATA	ORYSATA	822	879	1039	1022	96	-217	-1.49	0
3114	2	3	9	PA-IIL	PA-IIL	361	566	991	994	66	-630	-6.485	0
3114	2	4	9	PA-IIL	PA-IIL	435	581	965	959	63	-530	-6	0
3114	2	5	9	PA-IL	PA-IL	713	646	1060	1063	56	-347	-7.446	0
3114	2	6	9	PA-IL	PA-IL	757	684	1135	1134	45	-378	-10	0
3114	2	7	9	PALa	PALa	465	701	1125	1100	109	-660	-3.661	0
3114	2	8	9	PALa	PALa	466	803	1172	1136	126	-706	-2.643	0
3114	2	9	9	PHA-E	PHA-E	2910	2743	1206	1202	51	1704	30.216	0
3114	2	10	9	PHA-E	PHA-E	3532	3320	1248	1248	50	2284	41.44	0
3114	2	11	9	PHA-L	PHA-L	1075	1098	1270	1231	152	-195	-0.875	0
3114	2	12	9	PHA-L	PHA-L	1285	1292	1278	1257	106	7	0.33	0
3114	2	1	10	PHA-P	PHA-P	1011	1008	1042	1043	60	-31	-0.583	0
3114	2	2	10	PHA-P	PHA-P	935	890	1040	1023	97	-105	-1.371	0
3114	2	3	10	PNA	PNA	690	695	987	994	133	-297	-2.248	0
3114	2	4	10	PNA	PNA	691	685	987	980	60	-296	-4.917	0
3114	2	5	10	PPL	PPL	882	873	1079	1081	58	-197	-3.586	0
3114	2	6	10	PPL	PPL	937	944	1138	1138	69	-201	-2.812	0
3114	2	7	10	PSA/PEA	PSA/PEA	1390	1454	1151	1129	108	239	3.009	0
3114	2	8	10	PSA/PEA	PSA/PEA	1399	1487	1178	1140	124	221	2.798	0
3114	2	9	10	PSL1A	PSL1A	6599	8020	1220	1219	55	5379	123.655	0
3114	2	10	10	PSL1A	PSL1A	7302	9796	1248	1250	51	6054	167.569	0
3114	2	11	10	PTL	PTL	1372	1359	1274	1240	144	98	0.826	0
3114	2	12	10	PTL	PTL	1341	1309	1274	1255	105	67	0.514	0
3114	2	1	11	RS-FUC	RS-FUC	828	717	1046	1046	49	-218	-6.714	0
3114	2	2	11	RS-FUC	RS-FUC	781	739	1035	1003	113	-254	-2.336	0
3114	2	3	11	SAMB	SAMB	18051	17416	981	980	55	17070	298.836	0
3114	2	4	11	SAMB	SAMB	17161	16982	985	987	102	16176	156.814	0
3114	2	5	11	SBA	SBA	469	581	1057	1057	41	-588	-11.61	0
3114	2	6	11	SBA	SBA	535	630	1101	1101	39	-566	-12.077	0
3114	2	7	11	SJA	SJA	739	747	1147	1128	104	-408	-3.663	0
3114	2	8	11	SJA	SJA	864	827	1182	1147	121	-318	-2.645	0
3114	2	9	11	SNA-I	SNA-I	1848	1917	1218	1214	52	630	13.519	0
3114	2	10	11	SNA-I	SNA-I	3911	4721	1251	1251	41	2660	84.634	0
3114	2	11	11	SNA-II	SNA-II	987	1040	1264	1218	177	-277	-1.006	0
3114	2	12	11	SNA-II	SNA-II	1048	1044	1265	1234	125	-217	-1.52	0
3114	2	1	12	STL	STL	2178	2100	1046	1044	45	1132	23.467	0
3114	2	2	12	STL	STL	1973	1962	1021	1004	83	952	11.542	0
3114	2	3	12	UDA	UDA	735	721	967	968	58	-232	-4.259	0
3114	2	4	12	UDA	UDA	731	715	975	971	62	-244	-4.129	0
3114	2	5	12	UEA I	UEA I	1085	1111	1069	1070	48	16	0.854	0
3114	2	6	12	UEA I	UEA I	1143	1181	1110	1109	41	33	1.756	0
3114	2	7	12	UEA-II	UEA-II	1204	1226	1137	1112	114	67	1	0
3114	2	8	12	UEA-II	UEA-II	1199	1227	1184	1149	119	15	0.655	0
3114	2	9	12	VFA	VFA	1117	1127	1207	1204	57	-90	-1.351	0
3114	2	10	12	VFA	VFA	1061	1079	1242	1244	49	-181	-3.367	0
3114	2	11	12	VVA	VVA	5733	5731	1262	1233	136	4471	33.074	0
3114	2	12	12	VVA	VVA	5641	5660	1254	1237	97	4387	45.598	0
3114	2	1	13	WFA	WFA	474	526	1042	1040	45	-568	-11.422	0
3114	2	2	13	WFA	WFA	564	592	1014	1000	91	-450	-4.484	0
3114	2	3	13	WGA	WGA	1039	994	974	975	49	65	0.388	0
3114	2	4	13	WGA	WGA	1001	988	951	949	56	50	0.696	0
3114	2	5	13	NEG	NEG	138	314	1048	1049	79	-910	-9.304	0
3114	2	6	13	NEG	NEG	126	330	1111	1111	39	-985	-20.026	0
3114	2	7	13	NEG	NEG	197	266	1177	1154	121	-980	-7.339	0
3114	2	8	13	NEG	NEG	218	246	1189	1159	115	-971	-7.939	0
3114	2	9	13	POS2	POS2	6756	6353	1205	1197	101	5551	51.05	0
3114	2	10	13	POS2	POS2	7613	6847	1233	1236	136	6380	41.257	0
3114	2	11	13	POS1	POS1	20098	18793	1255	1222	145	18843	121.179	0
3114	2	12	13	POS1	POS1	21586	19580	1264	1248	101	20322	181.505	0
2629	3	1	1	POS1	POS1	16221	11811	955	951	56	15266	193.929	0
2629	3	2	1	POS1	POS1	19377	13980	935	935	53	18442	246.132	0
2629	3	3	1	POS2	POS2	2335	2754	942	933	73	1393	24.945	0
2629	3	4	1	POS2	POS2	2409	3739	930	937	77	1479	36.39	0
2629	3	5	1	NEG	NEG	97	347	865	855	66	-768	-7.697	0
2629	3	6	1	NEG	NEG	137	438	951	946	59	-814	-8.61	0
2629	3	7	1	NEG	NEG	147	447	996	996	94	-849	-5.84	0
2629	3	8	1	NEG	NEG	291	642	1014	1001	86	-723	-4.174	0
2629	3	9	1	AAA	AAA	731	759	1057	1051	56	-326	-5.214	0
2629	3	10	1	AAA	AAA	783	787	1050	1047	53	-267	-4.906	0
2629	3	11	1	AAL	AAL	998	1002	1021	1016	55	-23	-0.255	0
2629	3	12	1	AAL	AAL	1075	1081	1056	1049	65	19	0.492	0
2629	3	1	2	ACG	ACG	1266	1205	929	925	54	337	5.185	0
2629	3	2	2	ACG	ACG	1247	1174	934	934	50	313	4.8	0
2629	3	3	2	ACL	ACL	485	560	951	936	98	-466	-3.837	0
2629	3	4	2	ACL	ACL	611	612	944	936	73	-333	-4.438	0
2629	3	5	2	ASA	ASA	3209	3717	871	867	101	2338	28.218	0
2629	3	6	2	ASA	ASA	4112	4476	952	948	59	3160	59.797	0
2629	3	7	2	BANLEC	BANLEC	2917	2956	1007	1004	57	1910	34.246	0
2629	3	8	2	BANLEC	BANLEC	3644	3439	1002	1003	114	2642	21.368	0
2629	3	9	2	BC2L-A	BC2L-A	1041	992	1033	1033	64	8	-0.641	0
2629	3	10	2	BC2L-A	BC2L-A	935	864	1042	1040	54	-107	-3.259	0
2629	3	11	2	BC2LCN	BC2LCN	805	833	1038	1033	76	-233	-2.632	0
2629	3	12	2	BC2LCN	BC2LCN	779	780	1017	1001	84	-238	-2.631	0
2629	3	1	3	BPA; BPL	BPA; BPL	802	829	920	916	65	-118	-1.338	0
2629	3	2	3	BPA; BPL	BPA; BPL	876	897	914	910	55	-38	-0.236	0
2629	3	3	3	CALSEPA	CALSEPA	2250	4609	923	914	83	1327	44.518	0
2629	3	4	3	CALSEPA	CALSEPA	2543	5470	935	942	66	1608	68.606	0
2629	3	5	3	CGL2	CGL2	954	1304	873	871	97	81	4.464	0
2629	3	6	3	CGL2	CGL2	976	1456	934	939	93	42	5.559	0
2629	3	7	3	CNL	CNL	633	611	1005	997	62	-372	-6.226	0
2629	3	8	3	CNL	CNL	675	623	1001	1001	49	-326	-7.714	0
2629	3	9	3	Con A	Con A	1388	1331	1027	1021	67	361	4.627	0
2629	3	10	3	Con A	Con A	1418	1383	1033	1029	56	385	6.321	0
2629	3	11	3	DBA	DBA	880	883	1038	1034	53	-158	-2.849	0
2629	3	12	3	DBA	DBA	952	932	1056	1050	61	-104	-1.934	0
2629	3	1	4	DISCOIDIN I	DISCOIDIN I	319	385	930	935	86	-611	-6.395	0
2629	3	2	4	DISCOIDIN I	DISCOIDIN I	290	353	886	927	1387	-596	-0.414	0
2629	3	3	4	DISCOIDIN II	DISCOIDIN II	526	557	881	863	80	-355	-3.825	0
2629	3	4	4	DISCOIDIN II	DISCOIDIN II	463	478	875	868	63	-412	-6.19	0
2629	3	5	4	DSA	DSA	3547	3188	811	808	86	2736	27.674	0
2629	3	6	4	DSA	DSA	3417	3156	926	943	121	2491	18.289	0
2629	3	7	4	ECA	ECA	596	846	986	987	74	-390	-1.905	0
2629	3	8	4	ECA	ECA	622	629	984	973	70	-362	-4.914	0
2629	3	9	4	EEL	EEL	593	631	1013	1013	60	-420	-6.367	0
2629	3	10	4	EEL	EEL	610	644	1027	1027	58	-417	-6.603	0
2629	3	11	4	F17AG	F17AG	694	708	1022	1021	50	-328	-6.26	0
2629	3	12	4	F17AG	F17AG	765	757	1034	1030	57	-269	-4.789	0
2629	3	1	5	GAL1	GAL1	152	358	882	881	80	-730	-6.537	0
2629	3	2	5	GAL1	GAL1	189	380	839	831	81	-650	-5.568	0
2629	3	3	5	GAL1-S	GAL1-S	170	294	834	827	73	-664	-7.301	0
2629	3	4	5	GAL1-S	GAL1-S	224	300	853	856	76	-629	-7.316	0
2629	3	5	5	GAL2	GAL2	520	485	813	803	70	-293	-4.543	0
2629	3	6	5	GAL2	GAL2	480	478	884	891	89	-404	-4.64	0
2629	3	7	5	GAL3	GAL3	112	283	961	967	75	-849	-9.12	0
2629	3	8	5	GAL3	GAL3	124	260	979	975	54	-855	-13.241	0
2629	3	9	5	GAL3C-S	GAL3C-S	1090	1103	996	985	91	94	1.297	0
2629	3	10	5	GAL3C-S	GAL3C-S	1072	1094	1006	1001	60	66	1.55	0
2629	3	11	5	GAL7-S	GAL7-S	442	493	1011	1007	48	-569	-10.708	0
2629	3	12	5	GAL7-S	GAL7-S	413	435	1011	1006	51	-598	-11.196	0
2629	3	1	6	GAL9	GAL9	246	351	808	804	92	-562	-4.924	0
2629	3	2	6	GAL9	GAL9	228	283	791	790	46	-563	-11.022	0
2629	3	3	6	GNA	GNA	13416	13183	780	772	66	12636	188.045	0
2629	3	4	6	GNA	GNA	10472	9930	749	739	72	9723	127.653	0
2629	3	5	6	GRFT	GRFT	832	3829	787	786	67	45	45.418	0
2629	3	6	6	GRFT	GRFT	1264	4366	873	871	55	391	63.545	0
2629	3	7	6	GS-I;?GSL-I	GS-I;?GSL-I	964	1015	932	934	76	32	1.066	0
2629	3	8	6	GS-I;?GSL-I	GS-I;?GSL-I	929	939	954	952	70	-25	-0.186	0
2629	3	9	6	GS-II; GSL-II	GS-II; GSL-II	568	600	983	981	50	-415	-7.62	0
2629	3	10	6	GS-II; GSL-II	GS-II; GSL-II	563	596	986	983	55	-423	-7.036	0
2629	3	11	6	HHA; HHL	HHA; HHL	9236	7797	1001	999	53	8235	128.264	0
2629	3	12	6	HHA; HHL	HHA; HHL	8578	7823	961	957	56	7617	122.607	0
2629	3	1	7	Jacalin	Jacalin	756	770	853	849	56	-97	-1.411	0
2629	3	2	7	Jacalin	Jacalin	779	763	824	824	59	-45	-1.034	0
2629	3	3	7	LBA	LBA	486	486	790	781	67	-304	-4.403	0
2629	3	4	7	LBA	LBA	440	466	709	696	93	-269	-2.473	0
2629	3	5	7	LcH A	LcH A	892	906	771	764	73	121	1.945	0
2629	3	6	7	LcH A	LcH A	863	901	843	841	45	20	1.333	0
2629	3	7	7	LEA	LEA	847	847	911	915	132	-64	-0.515	0
2629	3	8	7	LEA	LEA	838	867	927	922	58	-89	-0.948	0
2629	3	9	7	LENTIL	LENTIL	948	962	932	926	54	16	0.667	0
2629	3	10	7	LENTIL	LENTIL	981	992	934	931	62	47	0.984	0
2629	3	11	7	Lotus	Lotus	634	677	947	929	101	-313	-2.495	0
2629	3	12	7	Lotus	Lotus	652	662	911	898	90	-259	-2.622	0
2629	3	1	8	LSL-N	LSL-N	1066	1112	807	753	153	259	2.346	0
2629	3	2	8	LSL-N	LSL-N	1228	1219	858	855	55	370	6.618	0
2629	3	3	8	MAA; MAL	MAA; MAL	4255	3771	819	805	79	3436	37.544	0
2629	3	4	8	MAA; MAL	MAA; MAL	4577	4038	846	852	135	3731	23.6	0
2629	3	5	8	MALECTIN	MALECTIN	746	767	825	816	71	-79	-0.69	0
2629	3	6	8	MALECTIN	MALECTIN	599	627	894	895	75	-295	-3.573	0
2629	3	7	8	MOA	MOA	468	593	953	949	53	-485	-6.717	0
2629	3	8	8	MOA	MOA	503	621	945	940	61	-442	-5.23	0
2629	3	9	8	MPL; MPA	MPL; MPA	1281	1262	960	963	70	321	4.271	0
2629	3	10	8	MPL; MPA	MPL; MPA	1072	1089	980	975	60	92	1.9	0
2629	3	11	8	NPA	NPA	4624	4340	1006	1005	57	3618	58.509	0
2629	3	12	8	NPA	NPA	5028	4603	979	959	105	4049	34.705	0
2629	3	1	9	ORYSATA	ORYSATA	694	956	885	859	115	-191	0.843	0
2629	3	2	9	ORYSATA	ORYSATA	672	843	886	891	225	-214	-0.213	0
2629	3	3	9	PA-IIL	PA-IIL	459	545	824	813	77	-365	-3.481	0
2629	3	4	9	PA-IIL	PA-IIL	556	607	883	889	147	-327	-1.918	0
2629	3	5	9	PA-IL	PA-IL	553	533	882	884	172	-329	-2.041	0
2629	3	6	9	PA-IL	PA-IL	595	584	922	921	52	-327	-6.481	0
2629	3	7	9	PALa	PALa	521	880	975	977	53	-454	-1.83	0
2629	3	8	9	PALa	PALa	540	825	968	968	75	-428	-1.907	0
2629	3	9	9	PHA-E	PHA-E	4921	4529	982	995	461	3939	7.666	0
2629	3	10	9	PHA-E	PHA-E	5444	4864	1007	1007	78	4437	49.449	0
2629	3	11	9	PHA-L	PHA-L	1362	1384	1023	1022	49	339	7.388	0
2629	3	12	9	PHA-L	PHA-L	1645	1723	1030	1026	64	615	10.891	0
2629	3	1	10	PHA-P	PHA-P	852	840	911	902	67	-59	-0.925	0
2629	3	2	10	PHA-P	PHA-P	822	805	894	892	55	-72	-1.582	0
2629	3	3	10	PNA	PNA	579	603	836	825	86	-257	-2.581	0
2629	3	4	10	PNA	PNA	618	642	901	901	59	-283	-4.39	0
2629	3	5	10	PPL	PPL	759	717	894	889	65	-135	-2.646	0
2629	3	6	10	PPL	PPL	776	745	930	927	53	-154	-3.434	0
2629	3	7	10	PSA/PEA	PSA/PEA	1027	1030	969	969	43	58	1.419	0
2629	3	8	10	PSA/PEA	PSA/PEA	968	982	978	974	81	-10	0.099	0
2629	3	9	10	PSL1A	PSL1A	1934	2460	993	995	76	941	19.276	0
2629	3	10	10	PSL1A	PSL1A	2251	2816	999	993	62	1252	29.403	0
2629	3	11	10	PTL	PTL	1070	1052	1031	1028	52	39	0.462	0
2629	3	12	10	PTL	PTL	1063	1059	1035	1033	58	28	0.448	0
2629	3	1	11	RS-FUC	RS-FUC	798	714	938	929	58	-140	-3.707	0
2629	3	2	11	RS-FUC	RS-FUC	681	654	899	903	58	-218	-4.293	0
2629	3	3	11	SAMB	SAMB	14850	13349	844	841	102	14006	122.627	0
2629	3	4	11	SAMB	SAMB	15985	14805	916	919	61	15069	227.639	0
2629	3	5	11	SBA	SBA	466	524	913	900	67	-447	-5.612	0
2629	3	6	11	SBA	SBA	541	570	932	931	58	-391	-6.224	0
2629	3	7	11	SJA	SJA	561	558	978	972	53	-417	-7.811	0
2629	3	8	11	SJA	SJA	656	686	979	977	49	-323	-5.939	0
2629	3	9	11	SNA-I	SNA-I	3360	3001	992	990	44	2368	45.705	0
2629	3	10	11	SNA-I	SNA-I	3283	2879	994	994	77	2289	24.481	0
2629	3	11	11	SNA-II	SNA-II	846	855	1022	1016	72	-176	-2.236	0
2629	3	12	11	SNA-II	SNA-II	839	848	1026	1012	85	-187	-1.929	0
2629	3	1	12	STL	STL	3546	3298	928	925	54	2618	43.944	0
2629	3	2	12	STL	STL	3470	3270	927	926	51	2543	45.961	0
2629	3	3	12	UDA	UDA	655	666	837	831	98	-182	-1.684	0
2629	3	4	12	UDA	UDA	712	706	910	907	50	-198	-4.02	0
2629	3	5	12	UEA I	UEA I	1125	1116	917	907	64	208	3.266	0
2629	3	6	12	UEA I	UEA I	1199	1195	941	936	58	258	4.466	0
2629	3	7	12	UEA-II	UEA-II	821	2923	974	974	83	-153	23.482	0
2629	3	8	12	UEA-II	UEA-II	884	914	998	992	57	-114	-1.368	0
2629	3	9	12	VFA	VFA	928	938	1017	1013	51	-89	-1.471	0
2629	3	10	12	VFA	VFA	952	948	1017	1011	54	-65	-1.167	0
2629	3	11	12	VVA	VVA	9571	8814	1021	1016	57	8550	136.807	0
2629	3	12	12	VVA	VVA	7046	6401	1057	1054	52	5989	102.827	0
2629	3	1	13	WFA	WFA	559	621	951	947	53	-392	-6.151	0
2629	3	2	13	WFA	WFA	467	556	907	908	66	-440	-5.333	0
2629	3	3	13	WGA	WGA	872	854	862	841	106	10	0.123	0
2629	3	4	13	WGA	WGA	935	978	878	874	68	57	1.529	0
2629	3	5	13	NEG	NEG	107	251	918	906	71	-811	-9.225	0
2629	3	6	13	NEG	NEG	142	321	935	930	54	-793	-11.278	0
2629	3	7	13	NEG	NEG	174	277	991	987	59	-817	-12.034	0
2629	3	8	13	NEG	NEG	218	366	1003	997	64	-785	-9.859	0
2629	3	9	13	POS2	POS2	6562	6546	1024	1024	47	5538	117.489	0
2629	3	10	13	POS2	POS2	7818	7372	1029	1024	55	6789	115.418	0
2629	3	11	13	POS1	POS1	20445	19072	1015	1012	51	19430	354.118	0
2629	3	12	13	POS1	POS1	22629	20265	1032	1028	59	21597	326.051	0
3115	4	1	1	POS1	POS1	15479	12181	1348	1341	61	14131	177.705	0
3115	4	2	1	POS1	POS1	18514	14432	1348	1319	115	17166	114.026	0
3115	4	3	1	POS2	POS2	2289	2849	1376	1374	51	913	28.922	0
3115	4	4	1	POS2	POS2	2298	3249	1362	1342	91	936	20.956	0
3115	4	5	1	NEG	NEG	129	393	1314	1313	60	-1185	-15.333	0
3115	4	6	1	NEG	NEG	154	564	1342	1346	105	-1188	-7.448	0
3115	4	7	1	NEG	NEG	133	488	1379	1348	156	-1246	-5.513	0
3115	4	8	1	NEG	NEG	251	724	1430	1377	160	-1179	-4.081	0
3115	4	9	1	AAA	AAA	959	997	1478	1473	66	-519	-7.212	0
3115	4	10	1	AAA	AAA	911	1001	1523	1521	60	-612	-8.667	0
3115	4	11	1	AAL	AAL	1129	1150	1555	1511	173	-426	-2.087	0
3115	4	12	1	AAL	AAL	1033	1046	1548	1518	129	-515	-3.659	0
3115	4	1	2	ACG	ACG	1471	1464	1320	1315	63	151	2.365	0
3115	4	2	2	ACG	ACG	1377	1378	1343	1320	112	34	0.518	0
3115	4	3	2	ACL	ACL	693	827	1358	1352	76	-665	-6.908	0
3115	4	4	2	ACL	ACL	831	914	1347	1325	110	-516	-3.736	0
3115	4	5	2	ASA	ASA	5249	4925	1314	1314	56	3935	64.482	0
3115	4	6	2	ASA	ASA	6170	5966	1341	1337	64	4829	72.328	0
3115	4	7	2	BANLEC	BANLEC	4907	4416	1388	1333	171	3519	18.029	0
3115	4	8	2	BANLEC	BANLEC	5560	5409	1425	1380	173	4135	23.289	0
3115	4	9	2	BC2L-A	BC2L-A	1258	1236	1474	1469	62	-216	-3.758	0
3115	4	10	2	BC2L-A	BC2L-A	1237	1228	1520	1521	73	-283	-4.014	0
3115	4	11	2	BC2LCN	BC2LCN	970	1001	1523	1476	182	-553	-2.61	0
3115	4	12	2	BC2LCN	BC2LCN	948	961	1528	1506	166	-580	-3.283	0
3115	4	1	3	BPA; BPL	BPA; BPL	926	982	1319	1345	138	-393	-2.63	0
3115	4	2	3	BPA; BPL	BPA; BPL	934	999	1327	1321	162	-393	-1.988	0
3115	4	3	3	CALSEPA	CALSEPA	4788	8124	1326	1330	57	3462	119.193	0
3115	4	4	3	CALSEPA	CALSEPA	5010	9001	1326	1315	88	3684	87.341	0
3115	4	5	3	CGL2	CGL2	1590	2214	1299	1302	64	291	14.25	0
3115	4	6	3	CGL2	CGL2	2738	2709	1320	1319	57	1418	24.386	0
3115	4	7	3	CNL	CNL	687	754	1336	1291	160	-649	-3.356	0
3115	4	8	3	CNL	CNL	844	844	1423	1374	166	-579	-3.193	0
3115	4	9	3	Con A	Con A	1227	1234	1436	1439	96	-209	-2.135	0
3115	4	10	3	Con A	Con A	1371	1387	1498	1497	50	-127	-2.2	0
3115	4	11	3	DBA	DBA	968	1015	1503	1461	178	-535	-2.506	0
3115	4	12	3	DBA	DBA	955	1008	1511	1488	123	-556	-3.902	0
3115	4	1	4	DISCOIDIN I	DISCOIDIN I	375	533	1472	1494	135	-1097	-7.119	0
3115	4	2	4	DISCOIDIN I	DISCOIDIN I	406	521	1394	1416	185	-988	-4.838	0
3115	4	3	4	DISCOIDIN II	DISCOIDIN II	792	813	1344	1371	203	-552	-2.749	0
3115	4	4	4	DISCOIDIN II	DISCOIDIN II	757	767	1284	1268	84	-527	-5.964	0
3115	4	5	4	DSA	DSA	3781	3563	1273	1291	100	2508	22.72	0
3115	4	6	4	DSA	DSA	3089	2943	1302	1303	60	1787	27.333	0
3115	4	7	4	ECA	ECA	753	769	1321	1264	166	-568	-2.982	0
3115	4	8	4	ECA	ECA	756	769	1407	1371	159	-651	-3.786	0
3115	4	9	4	EEL	EEL	877	912	1434	1430	75	-557	-6.907	0
3115	4	10	4	EEL	EEL	919	951	1484	1484	52	-565	-10.25	0
3115	4	11	4	F17AG	F17AG	891	931	1469	1421	176	-578	-2.784	0
3115	4	12	4	F17AG	F17AG	834	854	1482	1460	130	-648	-4.662	0
3115	4	1	5	GAL1	GAL1	223	494	1426	1450	132	-1203	-7.242	0
3115	4	2	5	GAL1	GAL1	115	394	1401	1413	180	-1286	-5.661	0
3115	4	3	5	GAL1-S	GAL1-S	222	339	1328	1371	187	-1106	-5.519	0
3115	4	4	5	GAL1-S	GAL1-S	287	368	1248	1248	113	-961	-7.788	0
3115	4	5	5	GAL2	GAL2	811	824	1210	1220	84	-399	-4.714	0
3115	4	6	5	GAL2	GAL2	883	897	1283	1288	75	-400	-5.213	0
3115	4	7	5	GAL3	GAL3	100	263	1330	1295	137	-1230	-7.533	0
3115	4	8	5	GAL3	GAL3	208	413	1398	1356	151	-1190	-6.245	0
3115	4	9	5	GAL3C-S	GAL3C-S	1389	1403	1422	1420	90	-33	-0.189	0
3115	4	10	5	GAL3C-S	GAL3C-S	1434	1441	1444	1449	76	-10	-0.105	0
3115	4	11	5	GAL7-S	GAL7-S	689	792	1457	1414	171	-768	-3.637	0
3115	4	12	5	GAL7-S	GAL7-S	653	676	1442	1418	116	-789	-6.397	0
3115	4	1	6	GAL9	GAL9	305	418	1331	1350	189	-1026	-4.931	0
3115	4	2	6	GAL9	GAL9	272	385	1309	1315	172	-1037	-5.407	0
3115	4	3	6	GNA	GNA	19743	18928	1252	1284	178	18491	99.124	0
3115	4	4	6	GNA	GNA	17478	17014	1094	1086	135	16384	117.985	0
3115	4	5	6	GRFT	GRFT	1083	4469	1115	1107	97	-32	34.66	0
3115	4	6	6	GRFT	GRFT	1949	5460	1247	1246	60	702	70.233	0
3115	4	7	6	GS-I;?GSL-I	GS-I;?GSL-I	1206	1188	1282	1248	146	-76	-0.411	0
3115	4	8	6	GS-I;?GSL-I	GS-I;?GSL-I	1205	1208	1367	1321	160	-162	-0.706	0
3115	4	9	6	GS-II; GSL-II	GS-II; GSL-II	559	588	1411	1404	71	-852	-11.493	0
3115	4	10	6	GS-II; GSL-II	GS-II; GSL-II	656	713	1418	1422	60	-762	-11.817	0
3115	4	11	6	HHA; HHL	HHA; HHL	12155	10272	1401	1358	168	10754	53.06	0
3115	4	12	6	HHA; HHL	HHA; HHL	11955	10111	1376	1347	128	10579	68.469	0
3115	4	1	7	Jacalin	Jacalin	1091	1122	1342	1345	106	-251	-2.104	0
3115	4	2	7	Jacalin	Jacalin	1005	1002	1324	1327	169	-319	-1.923	0
3115	4	3	7	LBA	LBA	716	714	1284	1320	155	-568	-3.91	0
3115	4	4	7	LBA	LBA	746	750	1098	1045	162	-352	-1.821	0
3115	4	5	7	LcH A	LcH A	1117	1133	1017	1013	140	100	0.857	0
3115	4	6	7	LcH A	LcH A	1202	1215	1178	1166	89	24	0.551	0
3115	4	7	7	LEA	LEA	1219	1187	1257	1228	142	-38	-0.289	0
3115	4	8	7	LEA	LEA	1085	1055	1283	1234	168	-198	-1.065	0
3115	4	9	7	LENTIL	LENTIL	1300	1287	1343	1339	73	-43	-0.712	0
3115	4	10	7	LENTIL	LENTIL	1367	1393	1356	1357	67	11	0.537	0
3115	4	11	7	Lotus	Lotus	751	770	1329	1290	168	-578	-3.095	0
3115	4	12	7	Lotus	Lotus	699	681	1281	1256	123	-582	-4.675	0
3115	4	1	8	LSL-N	LSL-N	1597	1651	1338	1346	103	259	2.961	0
3115	4	2	8	LSL-N	LSL-N	1459	1501	1328	1323	146	131	1.219	0
3115	4	3	8	MAA; MAL	MAA; MAL	5119	4857	1291	1307	131	3828	27.099	0
3115	4	4	8	MAA; MAL	MAA; MAL	5313	4860	1136	1147	127	4177	29.236	0
3115	4	5	8	MALECTIN	MALECTIN	1165	1183	1205	1204	67	-40	-0.313	0
3115	4	6	8	MALECTIN	MALECTIN	1219	1213	1250	1273	847	-31	-0.071	0
3115	4	7	8	MOA	MOA	557	707	1290	1227	204	-733	-2.549	0
3115	4	8	8	MOA	MOA	549	718	1329	1280	150	-780	-3.747	0
3115	4	9	8	MPL; MPA	MPL; MPA	1657	1611	1385	1392	306	272	0.716	0
3115	4	10	8	MPL; MPA	MPL; MPA	1620	1612	1426	1428	62	194	2.968	0
3115	4	11	8	NPA	NPA	5526	4972	1404	1354	181	4122	19.989	0
3115	4	12	8	NPA	NPA	5872	5036	1400	1382	118	4472	30.966	0
3115	4	1	9	ORYSATA	ORYSATA	1113	1230	1350	1352	74	-237	-1.649	0
3115	4	2	9	ORYSATA	ORYSATA	1058	1139	1315	1293	112	-257	-1.375	0
3115	4	3	9	PA-IIL	PA-IIL	556	696	1260	1266	69	-704	-8.261	0
3115	4	4	9	PA-IIL	PA-IIL	414	690	1157	1162	87	-743	-5.425	0
3115	4	5	9	PA-IL	PA-IL	804	739	1253	1259	73	-449	-7.123	0
3115	4	6	9	PA-IL	PA-IL	896	857	1313	1312	85	-417	-5.353	0
3115	4	7	9	PALa	PALa	639	1193	1355	1318	152	-716	-0.822	0
3115	4	8	9	PALa	PALa	702	952	1381	1333	152	-679	-2.507	0
3115	4	9	9	PHA-E	PHA-E	4226	4044	1414	1413	102	2812	25.794	0
3115	4	10	9	PHA-E	PHA-E	4713	4551	1451	1452	54	3262	57.389	0
3115	4	11	9	PHA-L	PHA-L	1423	1438	1450	1404	178	-27	0.191	0
3115	4	12	9	PHA-L	PHA-L	1624	1648	1452	1430	116	172	1.879	0
3115	4	1	10	PHA-P	PHA-P	1142	1150	1341	1342	93	-199	-2.065	0
3115	4	2	10	PHA-P	PHA-P	1074	1067	1333	1328	387	-259	-0.674	0
3115	4	3	10	PNA	PNA	872	955	1312	1303	84	-440	-4.143	0
3115	4	4	10	PNA	PNA	792	851	1182	1174	78	-390	-4.141	0
3115	4	5	10	PPL	PPL	1102	1093	1288	1291	63	-186	-3.143	0
3115	4	6	10	PPL	PPL	1081	1064	1342	1344	51	-261	-5.49	0
3115	4	7	10	PSA/PEA	PSA/PEA	1557	1552	1364	1343	175	193	1.194	0
3115	4	8	10	PSA/PEA	PSA/PEA	1605	1600	1403	1355	159	202	1.541	0
3115	4	9	10	PSL1A	PSL1A	4706	5399	1439	1438	79	3267	50.139	0
3115	4	10	10	PSL1A	PSL1A	6011	6775	1455	1454	48	4556	110.854	0
3115	4	11	10	PTL	PTL	1493	1490	1470	1428	176	23	0.352	0
3115	4	12	10	PTL	PTL	1512	1454	1483	1459	125	29	-0.04	0
3115	4	1	11	RS-FUC	RS-FUC	921	820	1340	1341	107	-419	-4.869	0
3115	4	2	11	RS-FUC	RS-FUC	762	736	1340	1315	122	-578	-4.746	0
3115	4	3	11	SAMB	SAMB	16245	15905	1332	1339	105	14913	138.724	0
3115	4	4	11	SAMB	SAMB	16517	16283	1212	1214	142	15305	106.12	0
3115	4	5	11	SBA	SBA	565	669	1296	1298	54	-731	-11.648	0
3115	4	6	11	SBA	SBA	747	816	1355	1357	56	-608	-9.661	0
3115	4	7	11	SJA	SJA	1144	1079	1373	1320	191	-229	-1.262	0
3115	4	8	11	SJA	SJA	1241	1145	1400	1338	177	-159	-1.09	0
3115	4	9	11	SNA-I	SNA-I	4031	3906	1430	1428	67	2601	36.985	0
3115	4	10	11	SNA-I	SNA-I	5644	5064	1465	1468	53	4179	67.849	0
3115	4	11	11	SNA-II	SNA-II	1242	1231	1460	1406	200	-218	-0.875	0
3115	4	12	11	SNA-II	SNA-II	1231	1226	1487	1449	156	-256	-1.429	0
3115	4	1	12	STL	STL	2333	2261	1308	1282	115	1025	8.513	0
3115	4	2	12	STL	STL	1913	1679	1342	1322	121	571	2.95	0
3115	4	3	12	UDA	UDA	1008	1020	1315	1310	74	-307	-3.919	0
3115	4	4	12	UDA	UDA	942	925	1223	1211	85	-281	-3.365	0
3115	4	5	12	UEA I	UEA I	1249	1265	1328	1330	58	-79	-1.121	0
3115	4	6	12	UEA I	UEA I	1175	1196	1354	1356	84	-179	-1.905	0
3115	4	7	12	UEA-II	UEA-II	1270	1246	1379	1344	158	-109	-0.62	0
3115	4	8	12	UEA-II	UEA-II	1176	1204	1416	1365	161	-240	-1	0
3115	4	9	12	VFA	VFA	1307	1329	1454	1451	76	-147	-1.605	0
3115	4	10	12	VFA	VFA	1256	1246	1475	1475	51	-219	-4.49	0
3115	4	11	12	VVA	VVA	6756	6508	1478	1433	173	5278	29.335	0
3115	4	12	12	VVA	VVA	6481	6239	1475	1452	126	5006	37.992	0
3115	4	1	13	WFA	WFA	668	796	1333	1341	285	-665	-1.912	0
3115	4	2	13	WFA	WFA	588	739	1346	1322	116	-758	-5.026	0
3115	4	3	13	WGA	WGA	1353	1315	1347	1348	75	6	-0.44	0
3115	4	4	13	WGA	WGA	1125	1125	1217	1212	79	-92	-1.101	0
3115	4	5	13	NEG	NEG	164	363	1316	1306	96	-1152	-9.823	0
3115	4	6	13	NEG	NEG	141	427	1385	1384	47	-1244	-20.362	0
3115	4	7	13	NEG	NEG	271	413	1393	1364	158	-1122	-6.019	0
3115	4	8	13	NEG	NEG	307	396	1445	1395	156	-1138	-6.404	0
3115	4	9	13	POS2	POS2	7172	7222	1475	1474	83	5697	69.253	0
3115	4	10	13	POS2	POS2	7755	7198	1476	1480	53	6279	107.887	0
3115	4	11	13	POS1	POS1	20819	19535	1465	1422	201	19354	90.114	0
3115	4	12	13	POS1	POS1	22825	20852	1450	1405	158	21375	123.082	0
2630	5	1	1	POS1	POS1	15732	11840	970	964	68	14762	159.941	0
2630	5	2	1	POS1	POS1	18721	13782	990	987	58	17731	220.603	0
2630	5	3	1	POS2	POS2	2315	2821	995	981	98	1320	18.776	0
2630	5	4	1	POS2	POS2	2281	3218	1003	1002	49	1278	45.224	0
2630	5	5	1	NEG	NEG	147	271	946	919	115	-799	-5.635	0
2630	5	6	1	NEG	NEG	167	609	1023	1020	62	-856	-6.629	0
2630	5	7	1	NEG	NEG	120	423	1069	1070	51	-949	-12.686	0
2630	5	8	1	NEG	NEG	167	520	1063	1052	74	-896	-7.189	0
2630	5	9	1	AAA	AAA	767	801	1101	1096	60	-334	-4.917	0
2630	5	10	1	AAA	AAA	806	820	1069	1063	56	-263	-4.339	0
2630	5	11	1	AAL	AAL	851	849	1078	1075	53	-227	-4.264	0
2630	5	12	1	AAL	AAL	997	983	1082	1078	64	-85	-1.484	0
2630	5	1	2	ACG	ACG	1125	1116	1007	997	72	118	1.653	0
2630	5	2	2	ACG	ACG	1124	1070	979	981	57	145	1.561	0
2630	5	3	2	ACL	ACL	526	595	1001	1011	819	-475	-0.508	0
2630	5	4	2	ACL	ACL	550	608	1003	1000	71	-453	-5.521	0
2630	5	5	2	ASA	ASA	3205	4961	953	935	91	2252	44.242	0
2630	5	6	2	ASA	ASA	5323	6164	1018	1014	67	4305	76.866	0
2630	5	7	2	BANLEC	BANLEC	3794	3924	1085	1085	50	2709	56.78	0
2630	5	8	2	BANLEC	BANLEC	4173	4787	1085	1077	70	3088	53	0
2630	5	9	2	BC2L-A	BC2L-A	1129	1061	1105	1102	49	24	-0.837	0
2630	5	10	2	BC2L-A	BC2L-A	1211	1170	1088	1085	61	123	1.393	0
2630	5	11	2	BC2LCN	BC2LCN	829	846	1086	1085	50	-257	-4.78	0
2630	5	12	2	BC2LCN	BC2LCN	848	875	1093	1091	68	-245	-3.176	0
2630	5	1	3	BPA; BPL	BPA; BPL	831	853	1019	1015	69	-188	-2.348	0
2630	5	2	3	BPA; BPL	BPA; BPL	791	812	979	980	67	-188	-2.507	0
2630	5	3	3	CALSEPA	CALSEPA	2498	4300	974	966	131	1524	25.45	0
2630	5	4	3	CALSEPA	CALSEPA	2931	4433	991	994	102	1940	33.716	0
2630	5	5	3	CGL2	CGL2	1195	1455	924	912	79	271	6.873	0
2630	5	6	3	CGL2	CGL2	1223	1491	997	990	62	226	8.081	0
2630	5	7	3	CNL	CNL	605	573	1037	1034	60	-432	-7.683	0
2630	5	8	3	CNL	CNL	872	743	1076	1070	75	-204	-4.36	0
2630	5	9	3	Con A	Con A	1149	1160	1101	1097	55	48	1.145	0
2630	5	10	3	Con A	Con A	1242	1263	1117	1109	71	125	2.169	0
2630	5	11	3	DBA	DBA	937	923	1119	1111	60	-182	-3.133	0
2630	5	12	3	DBA	DBA	962	934	1087	1082	63	-125	-2.349	0
2630	5	1	4	DISCOIDIN I	DISCOIDIN I	364	445	1078	1091	116	-714	-5.569	0
2630	5	2	4	DISCOIDIN I	DISCOIDIN I	358	420	1030	1038	99	-672	-6.242	0
2630	5	3	4	DISCOIDIN II	DISCOIDIN II	506	569	961	951	89	-455	-4.292	0
2630	5	4	4	DISCOIDIN II	DISCOIDIN II	480	523	957	959	47	-477	-9.277	0
2630	5	5	4	DSA	DSA	2882	2618	893	883	78	1989	22.244	0
2630	5	6	4	DSA	DSA	2866	2694	961	970	400	1905	4.31	0
2630	5	7	4	ECA	ECA	681	685	1025	1026	51	-344	-6.686	0
2630	5	8	4	ECA	ECA	646	656	1030	1017	83	-384	-4.349	0
2630	5	9	4	EEL	EEL	1014	1019	1102	1098	61	-88	-1.295	0
2630	5	10	4	EEL	EEL	1021	1027	1107	1097	72	-86	-0.972	0
2630	5	11	4	F17AG	F17AG	738	733	1110	1109	50	-372	-7.52	0
2630	5	12	4	F17AG	F17AG	732	734	1108	1104	54	-376	-6.852	0
2630	5	1	5	GAL1	GAL1	132	396	1089	1100	129	-957	-5.457	0
2630	5	2	5	GAL1	GAL1	184	379	1081	1102	123	-897	-5.878	0
2630	5	3	5	GAL1-S	GAL1-S	219	322	1008	998	107	-789	-6.318	0
2630	5	4	5	GAL1-S	GAL1-S	229	295	933	939	55	-704	-11.709	0
2630	5	5	5	GAL2	GAL2	625	595	888	878	74	-263	-3.824	0
2630	5	6	5	GAL2	GAL2	640	633	960	959	59	-320	-5.525	0
2630	5	7	5	GAL3	GAL3	87	226	996	996	53	-909	-14.528	0
2630	5	8	5	GAL3	GAL3	103	249	1022	1013	76	-919	-10.053	0
2630	5	9	5	GAL3C-S	GAL3C-S	1061	1091	1051	1044	62	10	0.758	0
2630	5	10	5	GAL3C-S	GAL3C-S	1157	1183	1076	1070	64	81	1.766	0
2630	5	11	5	GAL7-S	GAL7-S	465	515	1112	1117	262	-647	-2.298	0
2630	5	12	5	GAL7-S	GAL7-S	394	427	1094	1089	60	-700	-11.033	0
2630	5	1	6	GAL9	GAL9	304	440	1023	1040	113	-719	-5.31	0
2630	5	2	6	GAL9	GAL9	248	336	991	1000	88	-743	-7.545	0
2630	5	3	6	GNA	GNA	20835	21835	955	948	110	19880	189.882	0
2630	5	4	6	GNA	GNA	18325	17382	889	891	72	17436	229.042	0
2630	5	5	6	GRFT	GRFT	1030	5891	857	851	72	173	70	0
2630	5	6	6	GRFT	GRFT	4403	7073	956	951	60	3447	102.033	0
2630	5	7	6	GS-I;?GSL-I	GS-I;?GSL-I	937	977	980	977	80	-43	0	0
2630	5	8	6	GS-I;?GSL-I	GS-I;?GSL-I	947	973	982	975	76	-35	-0.026	0
2630	5	9	6	GS-II; GSL-II	GS-II; GSL-II	569	615	1034	1036	191	-465	-2.204	0
2630	5	10	6	GS-II; GSL-II	GS-II; GSL-II	660	685	1063	1058	62	-403	-6.016	0
2630	5	11	6	HHA; HHL	HHA; HHL	12096	10175	1057	1058	59	11039	154.525	0
2630	5	12	6	HHA; HHL	HHA; HHL	11481	9529	1004	967	125	10477	68.496	0
2630	5	1	7	Jacalin	Jacalin	837	854	995	995	82	-158	-1.72	0
2630	5	2	7	Jacalin	Jacalin	817	841	968	968	78	-151	-1.628	0
2630	5	3	7	LBA	LBA	530	559	925	909	86	-395	-4.07	0
2630	5	4	7	LBA	LBA	650	668	897	890	64	-247	-3.469	0
2630	5	5	7	LcH A	LcH A	884	885	865	860	121	19	0.207	0
2630	5	6	7	LcH A	LcH A	924	988	907	906	62	17	1.323	0
2630	5	7	7	LEA	LEA	970	962	971	969	51	-1	-0.137	0
2630	5	8	7	LEA	LEA	953	945	961	953	77	-8	-0.104	0
2630	5	9	7	LENTIL	LENTIL	974	973	960	957	61	14	0.262	0
2630	5	10	7	LENTIL	LENTIL	951	979	954	955	79	-3	0.304	0
2630	5	11	7	Lotus	Lotus	610	595	977	960	113	-367	-3.23	0
2630	5	12	7	Lotus	Lotus	650	642	965	946	117	-315	-2.598	0
2630	5	1	8	LSL-N	LSL-N	1226	1233	978	979	74	248	3.432	0
2630	5	2	8	LSL-N	LSL-N	1186	1249	954	938	111	232	2.802	0
2630	5	3	8	MAA; MAL	MAA; MAL	3468	3044	932	918	84	2536	25.31	0
2630	5	4	8	MAA; MAL	MAA; MAL	3496	3074	973	977	54	2523	38.833	0
2630	5	5	8	MALECTIN	MALECTIN	844	869	965	952	87	-121	-0.954	0
2630	5	6	8	MALECTIN	MALECTIN	840	856	984	981	58	-144	-2.155	0
2630	5	7	8	MOA	MOA	494	582	1000	1000	44	-506	-9.5	0
2630	5	8	8	MOA	MOA	490	606	999	991	72	-509	-5.347	0
2630	5	9	8	MPL; MPA	MPL; MPA	1297	1238	1034	1031	55	263	3.764	0
2630	5	10	8	MPL; MPA	MPL; MPA	1472	1362	1052	1050	69	420	4.522	0
2630	5	11	8	NPA	NPA	6600	5985	1098	1095	57	5502	85.789	0
2630	5	12	8	NPA	NPA	6253	5509	1082	1078	58	5171	76.397	0
2630	5	1	9	ORYSATA	ORYSATA	810	948	973	970	63	-163	-0.349	0
2630	5	2	9	ORYSATA	ORYSATA	788	985	958	957	50	-170	0.56	0
2630	5	3	9	PA-IIL	PA-IIL	424	538	925	912	78	-501	-4.795	0
2630	5	4	9	PA-IIL	PA-IIL	354	528	985	987	75	-631	-6.12	0
2630	5	5	9	PA-IL	PA-IL	696	634	991	981	135	-295	-2.57	0
2630	5	6	9	PA-IL	PA-IL	730	673	1031	1030	97	-301	-3.68	0
2630	5	7	9	PALa	PALa	592	774	1021	1029	198	-429	-1.288	0
2630	5	8	9	PALa	PALa	536	717	1011	999	76	-475	-3.711	0
2630	5	9	9	PHA-E	PHA-E	2964	2973	1044	1042	62	1920	31.145	0
2630	5	10	9	PHA-E	PHA-E	3290	3162	1057	1052	66	2233	31.97	0
2630	5	11	9	PHA-L	PHA-L	1000	1019	1122	1120	67	-122	-1.507	0
2630	5	12	9	PHA-L	PHA-L	1138	1195	1110	1102	65	28	1.431	0
2630	5	1	10	PHA-P	PHA-P	863	868	994	989	67	-131	-1.806	0
2630	5	2	10	PHA-P	PHA-P	846	851	972	964	62	-126	-1.823	0
2630	5	3	10	PNA	PNA	651	706	923	911	93	-272	-2.204	0
2630	5	4	10	PNA	PNA	725	765	984	980	56	-259	-3.839	0
2630	5	5	10	PPL	PPL	852	819	994	981	80	-142	-2.025	0
2630	5	6	10	PPL	PPL	843	808	1042	1038	56	-199	-4.107	0
2630	5	7	10	PSA/PEA	PSA/PEA	1162	1164	1061	1059	53	101	1.981	0
2630	5	8	10	PSA/PEA	PSA/PEA	1037	1045	1001	995	75	36	0.667	0
2630	5	9	10	PSL1A	PSL1A	2699	3310	1052	1050	56	1647	40.357	0
2630	5	10	10	PSL1A	PSL1A	2617	3299	1067	1062	88	1550	25.42	0
2630	5	11	10	PTL	PTL	1162	1131	1132	1132	59	30	-0.017	0
2630	5	12	10	PTL	PTL	1195	1184	1139	1137	121	56	0.388	0
2630	5	1	11	RS-FUC	RS-FUC	731	668	1007	999	81	-276	-4.086	0
2630	5	2	11	RS-FUC	RS-FUC	729	634	968	969	53	-239	-6.321	0
2630	5	3	11	SAMB	SAMB	16655	16314	939	926	91	15716	169.099	0
2630	5	4	11	SAMB	SAMB	12096	12362	993	999	67	11103	169.597	0
2630	5	5	11	SBA	SBA	562	652	977	957	97	-415	-3.144	0
2630	5	6	11	SBA	SBA	582	638	1029	1027	61	-447	-6.377	0
2630	5	7	11	SJA	SJA	697	701	1074	1073	50	-377	-7.44	0
2630	5	8	11	SJA	SJA	803	798	1037	1029	75	-234	-3.08	0
2630	5	9	11	SNA-I	SNA-I	2974	2888	1049	1046	55	1925	33.491	0
2630	5	10	11	SNA-I	SNA-I	4119	3854	1087	1080	66	3032	42.03	0
2630	5	11	11	SNA-II	SNA-II	992	961	1119	1107	86	-127	-1.698	0
2630	5	12	11	SNA-II	SNA-II	924	926	1114	1102	85	-190	-2.071	0
2630	5	1	12	STL	STL	2938	2715	1012	1011	56	1926	30.429	0
2630	5	2	12	STL	STL	2833	2649	988	988	63	1845	26.365	0
2630	5	3	12	UDA	UDA	761	763	942	927	98	-181	-1.673	0
2630	5	4	12	UDA	UDA	829	825	1003	1005	48	-174	-3.75	0
2630	5	5	12	UEA I	UEA I	960	930	991	978	87	-31	-0.552	0
2630	5	6	12	UEA I	UEA I	1047	1057	1019	1020	70	28	0.529	0
2630	5	7	12	UEA-II	UEA-II	1000	1062	1071	1081	272	-71	-0.07	0
2630	5	8	12	UEA-II	UEA-II	972	968	1067	1061	79	-95	-1.177	0
2630	5	9	12	VFA	VFA	976	997	1086	1081	67	-110	-1.254	0
2630	5	10	12	VFA	VFA	1078	1098	1073	1071	71	5	0.38	0
2630	5	11	12	VVA	VVA	8195	7329	1058	1035	106	7137	59.377	0
2630	5	12	12	VVA	VVA	7964	7378	1047	993	233	6917	27.403	0
2630	5	1	13	WFA	WFA	537	636	1034	1026	57	-497	-6.842	0
2630	5	2	13	WFA	WFA	586	665	981	979	56	-395	-5.607	0
2630	5	3	13	WGA	WGA	1002	1003	970	950	103	32	0.515	0
2630	5	4	13	WGA	WGA	1029	1027	1001	1000	58	28	0.466	0
2630	5	5	13	NEG	NEG	155	350	1001	985	81	-846	-7.84	0
2630	5	6	13	NEG	NEG	93	275	1024	1020	62	-931	-12.016	0
2630	5	7	13	NEG	NEG	381	556	1068	1056	158	-687	-3.165	0
2630	5	8	13	NEG	NEG	472	588	1055	1023	141	-583	-3.085	0
2630	5	9	13	POS2	POS2	6976	6829	1115	1110	53	5861	107.906	0
2630	5	10	13	POS2	POS2	8320	7590	1068	1063	98	7252	66.602	0
2630	5	11	13	POS1	POS1	21834	19601	1119	1113	79	20715	234.025	0
2630	5	12	13	POS1	POS1	21781	19202	985	912	219	20796	83.516	0
3116	6	1	1	POS1	POS1	15882	12509	1491	1488	61	14391	180.672	0
3116	6	2	1	POS1	POS1	18573	14726	1498	1469	126	17075	105.214	0
3116	6	3	1	POS2	POS2	2387	2938	1505	1507	50	882	28.62	0
3116	6	4	1	POS2	POS2	2307	3294	1480	1462	90	827	20.356	0
3116	6	5	1	NEG	NEG	175	618	1414	1410	69	-1239	-11.478	0
3116	6	6	1	NEG	NEG	136	575	1454	1454	65	-1318	-13.523	0
3116	6	7	1	NEG	NEG	154	537	1494	1455	157	-1340	-5.847	0
3116	6	8	1	NEG	NEG	251	695	1549	1501	154	-1298	-5.234	0
3116	6	9	1	AAA	AAA	1010	1058	1581	1576	159	-571	-3.258	0
3116	6	10	1	AAA	AAA	1048	1085	1596	1596	55	-548	-9.291	0
3116	6	11	1	AAL	AAL	1118	1150	1604	1555	188	-486	-2.154	0
3116	6	12	1	AAL	AAL	1091	1097	1561	1521	150	-470	-2.827	0
3116	6	1	2	ACG	ACG	1780	1743	1450	1447	69	330	4.29	0
3116	6	2	2	ACG	ACG	1591	1599	1460	1436	122	131	1.336	0
3116	6	3	2	ACL	ACL	845	957	1481	1474	93	-636	-5.559	0
3116	6	4	2	ACL	ACL	902	944	1439	1417	112	-537	-4.223	0
3116	6	5	2	ASA	ASA	6181	6238	1425	1423	64	4756	75.234	0
3116	6	6	2	ASA	ASA	7421	7502	1474	1470	56	5947	107.714	0
3116	6	7	2	BANLEC	BANLEC	9025	8968	1515	1483	160	7510	46.781	0
3116	6	8	2	BANLEC	BANLEC	9311	8183	1559	1503	168	7752	39.762	0
3116	6	9	2	BC2L-A	BC2L-A	1619	1565	1594	1586	86	25	-0.244	0
3116	6	10	2	BC2L-A	BC2L-A	1636	1539	1612	1615	75	24	-1.013	0
3116	6	11	2	BC2LCN	BC2LCN	1068	1126	1616	1561	195	-548	-2.231	0
3116	6	12	2	BC2LCN	BC2LCN	1071	1127	1576	1542	145	-505	-2.862	0
3116	6	1	3	BPA; BPL	BPA; BPL	1103	1140	1472	1504	165	-369	-2.206	0
3116	6	2	3	BPA; BPL	BPA; BPL	1030	1036	1459	1453	153	-429	-2.725	0
3116	6	3	3	CALSEPA	CALSEPA	5377	10284	1454	1461	72	3923	122.542	0
3116	6	4	3	CALSEPA	CALSEPA	6219	12907	1425	1418	261	4794	44.019	0
3116	6	5	3	CGL2	CGL2	1586	2572	1384	1384	54	202	22	0
3116	6	6	3	CGL2	CGL2	1835	2837	1434	1429	68	401	20.706	0
3116	6	7	3	CNL	CNL	869	896	1521	1500	143	-652	-4.224	0
3116	6	8	3	CNL	CNL	982	936	1538	1491	150	-556	-3.7	0
3116	6	9	3	Con A	Con A	1438	1458	1527	1494	120	-89	-0.3	0
3116	6	10	3	Con A	Con A	1644	1659	1610	1610	63	34	0.778	0
3116	6	11	3	DBA	DBA	944	1014	1601	1552	207	-657	-2.599	0
3116	6	12	3	DBA	DBA	947	1065	1563	1534	133	-616	-3.526	0
3116	6	1	4	DISCOIDIN I	DISCOIDIN I	383	503	1572	1603	184	-1189	-5.978	0
3116	6	2	4	DISCOIDIN I	DISCOIDIN I	399	560	1522	1540	197	-1123	-4.975	0
3116	6	3	4	DISCOIDIN II	DISCOIDIN II	963	1078	1491	1506	169	-528	-2.533	0
3116	6	4	4	DISCOIDIN II	DISCOIDIN II	888	963	1401	1384	130	-513	-3.238	0
3116	6	5	4	DSA	DSA	4443	4071	1348	1353	73	3095	37.233	0
3116	6	6	4	DSA	DSA	4005	3704	1378	1377	58	2627	40.121	0
3116	6	7	4	ECA	ECA	800	2261	1456	1418	171	-656	4.93	0
3116	6	8	4	ECA	ECA	783	786	1533	1487	150	-750	-4.673	0
3116	6	9	4	EEL	EEL	1337	1366	1553	1543	85	-216	-2.082	0
3116	6	10	4	EEL	EEL	1398	1424	1594	1588	71	-196	-2.31	0
3116	6	11	4	F17AG	F17AG	910	965	1591	1542	198	-681	-2.914	0
3116	6	12	4	F17AG	F17AG	868	918	1547	1520	129	-679	-4.667	0
3116	6	1	5	GAL1	GAL1	165	571	1576	1600	157	-1411	-6.554	0
3116	6	2	5	GAL1	GAL1	276	566	1543	1552	213	-1267	-4.629	0
3116	6	3	5	GAL1-S	GAL1-S	298	415	1482	1530	168	-1184	-6.637	0
3116	6	4	5	GAL1-S	GAL1-S	294	439	1396	1401	136	-1102	-7.074	0
3116	6	5	5	GAL2	GAL2	826	822	1353	1366	83	-527	-6.554	0
3116	6	6	5	GAL2	GAL2	868	847	1407	1417	100	-539	-5.7	0
3116	6	7	5	GAL3	GAL3	169	287	1462	1430	154	-1293	-7.422	0
3116	6	8	5	GAL3	GAL3	176	384	1505	1451	163	-1329	-6.546	0
3116	6	9	5	GAL3C-S	GAL3C-S	1178	1197	1266	1291	171	-88	-0.55	0
3116	6	10	5	GAL3C-S	GAL3C-S	1591	1597	1546	1527	107	45	0.654	0
3116	6	11	5	GAL7-S	GAL7-S	663	785	1583	1528	194	-920	-3.83	0
3116	6	12	5	GAL7-S	GAL7-S	560	646	1543	1510	137	-983	-6.307	0
3116	6	1	6	GAL9	GAL9	370	547	1506	1530	162	-1136	-6.068	0
3116	6	2	6	GAL9	GAL9	384	481	1469	1491	181	-1085	-5.58	0
3116	6	3	6	GNA	GNA	25411	24702	1422	1467	155	23989	149.903	0
3116	6	4	6	GNA	GNA	24675	23003	1326	1351	169	23349	128.118	0
3116	6	5	6	GRFT	GRFT	1762	9008	1300	1313	117	462	65.769	0
3116	6	6	6	GRFT	GRFT	9097	10211	1385	1386	56	7712	157.589	0
3116	6	7	6	GS-I;?GSL-I	GS-I;?GSL-I	1456	1465	1411	1375	159	45	0.566	0
3116	6	8	6	GS-I;?GSL-I	GS-I;?GSL-I	1385	1349	1469	1417	174	-84	-0.391	0
3116	6	9	6	GS-II; GSL-II	GS-II; GSL-II	551	599	1337	1354	145	-786	-5.207	0
3116	6	10	6	GS-II; GSL-II	GS-II; GSL-II	623	717	1496	1470	109	-873	-6.908	0
3116	6	11	6	HHA; HHL	HHA; HHL	13759	11578	1536	1495	175	12223	57.617	0
3116	6	12	6	HHA; HHL	HHA; HHL	14066	11945	1492	1454	161	12574	65.161	0
3116	6	1	7	Jacalin	Jacalin	1124	1141	1526	1560	159	-402	-2.635	0
3116	6	2	7	Jacalin	Jacalin	1002	1038	1460	1484	194	-458	-2.299	0
3116	6	3	7	LBA	LBA	775	814	1445	1491	170	-670	-3.982	0
3116	6	4	7	LBA	LBA	879	895	1281	1287	157	-402	-2.497	0
3116	6	5	7	LcH A	LcH A	1241	1267	1279	1280	83	-38	-0.157	0
3116	6	6	7	LcH A	LcH A	1254	1281	1322	1323	50	-68	-0.84	0
3116	6	7	7	LEA	LEA	1295	1272	1364	1325	155	-69	-0.342	0
3116	6	8	7	LEA	LEA	1206	1252	1411	1367	175	-205	-0.657	0
3116	6	9	7	LENTIL	LENTIL	1424	1471	1380	1367	113	44	0.92	0
3116	6	10	7	LENTIL	LENTIL	1324	1465	1354	1338	127	-30	1	0
3116	6	11	7	Lotus	Lotus	821	840	1458	1412	183	-637	-3.126	0
3116	6	12	7	Lotus	Lotus	756	745	1394	1357	158	-638	-3.873	0
3116	6	1	8	LSL-N	LSL-N	1900	1866	1469	1502	151	431	2.411	0
3116	6	2	8	LSL-N	LSL-N	1551	1631	1433	1440	179	118	1.067	0
3116	6	3	8	MAA; MAL	MAA; MAL	6594	5931	1430	1466	165	5164	27.061	0
3116	6	4	8	MAA; MAL	MAA; MAL	5433	5190	1317	1325	156	4116	24.776	0
3116	6	5	8	MALECTIN	MALECTIN	1326	1318	1392	1398	83	-66	-0.964	0
3116	6	6	8	MALECTIN	MALECTIN	1276	1295	1406	1409	54	-130	-2.111	0
3116	6	7	8	MOA	MOA	653	841	1429	1390	155	-776	-3.542	0
3116	6	8	8	MOA	MOA	731	903	1438	1397	169	-707	-2.923	0
3116	6	9	8	MPL; MPA	MPL; MPA	1606	1608	1343	1355	127	263	1.992	0
3116	6	10	8	MPL; MPA	MPL; MPA	1751	1729	1526	1467	155	225	1.69	0
3116	6	11	8	NPA	NPA	8328	7488	1578	1527	193	6750	30.886	0
3116	6	12	8	NPA	NPA	6942	6970	1524	1495	151	5418	36.258	0
3116	6	1	9	ORYSATA	ORYSATA	1304	1376	1464	1476	107	-160	-0.935	0
3116	6	2	9	ORYSATA	ORYSATA	1179	1398	1427	1401	124	-248	-0.024	0
3116	6	3	9	PA-IIL	PA-IIL	582	767	1397	1403	88	-815	-7.227	0
3116	6	4	9	PA-IIL	PA-IIL	838	875	1324	1325	197	-486	-2.284	0
3116	6	5	9	PA-IL	PA-IL	949	892	1412	1421	103	-463	-5.136	0
3116	6	6	9	PA-IL	PA-IL	986	913	1474	1477	64	-488	-8.812	0
3116	6	7	9	PALa	PALa	778	1444	1471	1433	160	-693	0.069	0
3116	6	8	9	PALa	PALa	778	1541	1400	1371	194	-622	0.876	0
3116	6	9	9	PHA-E	PHA-E	4016	4168	1463	1412	173	2553	15.931	0
3116	6	10	9	PHA-E	PHA-E	5407	5153	1608	1611	80	3799	44.275	0
3116	6	11	9	PHA-L	PHA-L	1656	1695	1625	1575	205	31	0.585	0
3116	6	12	9	PHA-L	PHA-L	1744	1829	1610	1575	149	134	1.705	0
3116	6	1	10	PHA-P	PHA-P	1254	1271	1430	1428	87	-176	-1.805	0
3116	6	2	10	PHA-P	PHA-P	1175	1169	1416	1387	130	-241	-1.677	0
3116	6	3	10	PNA	PNA	799	830	1378	1372	76	-579	-7.132	0
3116	6	4	10	PNA	PNA	851	875	1323	1310	99	-472	-4.394	0
3116	6	5	10	PPL	PPL	1165	1139	1417	1418	58	-252	-4.81	0
3116	6	6	10	PPL	PPL	1210	1210	1481	1487	56	-271	-4.946	0
3116	6	7	10	PSA/PEA	PSA/PEA	1719	1741	1509	1471	164	210	1.646	0
3116	6	8	10	PSA/PEA	PSA/PEA	1636	1669	1547	1510	350	89	0.454	0
3116	6	9	10	PSL1A	PSL1A	4301	6080	1597	1595	74	2704	60.608	0
3116	6	10	10	PSL1A	PSL1A	5140	7202	1635	1637	60	3505	92.75	0
3116	6	11	10	PTL	PTL	1684	1721	1656	1601	205	28	0.585	0
3116	6	12	10	PTL	PTL	1699	1665	1635	1603	142	64	0.437	0
3116	6	1	11	RS-FUC	RS-FUC	1005	902	1413	1411	62	-408	-8.21	0
3116	6	2	11	RS-FUC	RS-FUC	880	823	1431	1406	113	-551	-5.159	0
3116	6	3	11	SAMB	SAMB	19074	18102	1394	1390	71	17680	235.38	0
3116	6	4	11	SAMB	SAMB	20441	18707	1323	1319	180	19118	96.6	0
3116	6	5	11	SBA	SBA	619	726	1399	1372	132	-780	-4.894	0
3116	6	6	11	SBA	SBA	678	801	1485	1483	70	-807	-9.743	0
3116	6	7	11	SJA	SJA	876	907	1525	1498	142	-649	-4.162	0
3116	6	8	11	SJA	SJA	1006	1063	1557	1509	251	-551	-1.777	0
3116	6	9	11	SNA-I	SNA-I	4996	4726	1602	1598	81	3394	38.617	0
3116	6	10	11	SNA-I	SNA-I	6555	5711	1650	1656	74	4905	54.797	0
3116	6	11	11	SNA-II	SNA-II	1231	1280	1678	1623	203	-447	-1.69	0
3116	6	12	11	SNA-II	SNA-II	1256	1271	1654	1623	142	-398	-2.479	0
3116	6	1	12	STL	STL	3048	3269	1428	1423	62	1620	29.774	0
3116	6	2	12	STL	STL	3151	3066	1417	1392	115	1734	14.557	0
3116	6	3	12	UDA	UDA	1086	1071	1393	1399	199	-307	-1.648	0
3116	6	4	12	UDA	UDA	994	989	1332	1317	100	-338	-3.28	0
3116	6	5	12	UEA I	UEA I	1268	1269	1436	1441	70	-168	-2.457	0
3116	6	6	12	UEA I	UEA I	1313	1291	1494	1498	73	-181	-2.836	0
3116	6	7	12	UEA-II	UEA-II	1272	1282	1517	1476	158	-245	-1.228	0
3116	6	8	12	UEA-II	UEA-II	1197	1230	1568	1510	176	-371	-1.591	0
3116	6	9	12	VFA	VFA	1463	1459	1617	1611	66	-154	-2.303	0
3116	6	10	12	VFA	VFA	1456	1503	1657	1659	64	-201	-2.437	0
3116	6	11	12	VVA	VVA	9614	8962	1672	1614	203	7942	36.197	0
3116	6	12	12	VVA	VVA	7260	6829	1654	1627	140	5606	37.157	0
3116	6	1	13	WFA	WFA	587	712	1447	1459	395	-860	-1.891	0
3116	6	2	13	WFA	WFA	641	730	1431	1410	172	-790	-3.953	0
3116	6	3	13	WGA	WGA	1336	1343	1404	1400	71	-68	-0.803	0
3116	6	4	13	WGA	WGA	1275	1272	1319	1313	105	-44	-0.39	0
3116	6	5	13	NEG	NEG	170	421	1435	1428	89	-1265	-11.315	0
3116	6	6	13	NEG	NEG	175	490	1512	1515	61	-1337	-16.803	0
3116	6	7	13	NEG	NEG	309	425	1563	1523	166	-1254	-6.614	0
3116	6	8	13	NEG	NEG	345	508	1594	1537	172	-1249	-5.983	0
3116	6	9	13	POS2	POS2	6792	6747	1630	1623	64	5162	80.063	0
3116	6	10	13	POS2	POS2	8369	7319	1647	1647	54	6722	105.037	0
3116	6	11	13	POS1	POS1	20275	18922	1663	1614	197	18612	87.858	0
3116	6	12	13	POS1	POS1	22613	20803	1649	1618	144	20964	133.229	0
2628	7	1	1	POS1	POS1	15167	11334	692	689	43	14475	247.558	0
2628	7	2	1	POS1	POS1	17824	13100	689	689	42	17135	295.5	0
2628	7	3	1	POS2	POS2	2210	2639	658	649	55	1552	36.182	0
2628	7	4	1	POS2	POS2	2269	3054	651	652	34	1618	70.647	0
2628	7	5	1	NEG	NEG	105	291	599	587	61	-494	-4.852	0
2628	7	6	1	NEG	NEG	108	299	620	633	513	-512	-0.651	0
2628	7	7	1	NEG	NEG	113	309	670	670	48	-557	-7.521	0
2628	7	8	1	NEG	NEG	230	420	685	676	59	-455	-4.339	0
2628	7	9	1	AAA	AAA	570	583	723	724	53	-153	-2.66	0
2628	7	10	1	AAA	AAA	556	570	732	739	269	-176	-0.628	0
2628	7	11	1	AAL	AAL	802	799	754	754	57	48	0.789	0
2628	7	12	1	AAL	AAL	775	783	700	699	60	75	1.4	0
2628	7	1	2	ACG	ACG	1012	974	667	673	87	345	3.46	0
2628	7	2	2	ACG	ACG	1162	1068	673	676	49	489	8	0
2628	7	3	2	ACL	ACL	347	389	666	662	67	-319	-4.075	0
2628	7	4	2	ACL	ACL	461	453	654	658	51	-193	-4.02	0
2628	7	5	2	ASA	ASA	3670	4991	596	590	64	3074	68.766	0
2628	7	6	2	ASA	ASA	4472	5462	623	624	39	3849	124.051	0
2628	7	7	2	BANLEC	BANLEC	3462	3758	669	670	35	2793	88.229	0
2628	7	8	2	BANLEC	BANLEC	3932	3986	701	695	52	3231	63.288	0
2628	7	9	2	BC2L-A	BC2L-A	1003	938	717	716	37	286	6	0
2628	7	10	2	BC2L-A	BC2L-A	1146	1016	726	723	39	420	7.513	0
2628	7	11	2	BC2LCN	BC2LCN	697	672	749	746	44	-52	-1.682	0
2628	7	12	2	BC2LCN	BC2LCN	651	627	714	707	62	-63	-1.29	0
2628	7	1	3	BPA; BPL	BPA; BPL	602	602	661	662	58	-59	-1.034	0
2628	7	2	3	BPA; BPL	BPA; BPL	591	595	651	650	41	-60	-1.341	0
2628	7	3	3	CALSEPA	CALSEPA	2695	3902	637	644	215	2058	15.153	0
2628	7	4	3	CALSEPA	CALSEPA	3281	4636	641	649	115	2640	34.67	0
2628	7	5	3	CGL2	CGL2	666	908	586	578	54	80	6.111	0
2628	7	6	3	CGL2	CGL2	1055	1223	614	617	51	441	11.882	0
2628	7	7	3	CNL	CNL	573	474	666	666	44	-93	-4.364	0
2628	7	8	3	CNL	CNL	637	536	700	699	95	-63	-1.716	0
2628	7	9	3	Con A	Con A	1147	1074	713	713	43	434	8.395	0
2628	7	10	3	Con A	Con A	1416	1364	734	734	51	682	12.353	0
2628	7	11	3	DBA	DBA	781	804	747	748	61	34	0.918	0
2628	7	12	3	DBA	DBA	732	783	695	690	84	37	1.107	0
2628	7	1	4	DISCOIDIN I	DISCOIDIN I	245	312	632	630	40	-387	-7.95	0
2628	7	2	4	DISCOIDIN I	DISCOIDIN I	306	339	622	629	60	-316	-4.833	0
2628	7	3	4	DISCOIDIN II	DISCOIDIN II	517	529	622	619	69	-105	-1.304	0
2628	7	4	4	DISCOIDIN II	DISCOIDIN II	455	458	606	606	56	-151	-2.643	0
2628	7	5	4	DSA	DSA	2527	2148	576	582	90	1951	17.4	0
2628	7	6	4	DSA	DSA	2272	2087	615	632	97	1657	15	0
2628	7	7	4	ECA	ECA	463	482	645	645	38	-182	-4.289	0
2628	7	8	4	ECA	ECA	481	802	677	672	50	-196	2.6	0
2628	7	9	4	EEL	EEL	967	997	715	713	38	252	7.474	0
2628	7	10	4	EEL	EEL	1115	1099	728	725	44	387	8.5	0
2628	7	11	4	F17AG	F17AG	593	599	739	738	38	-146	-3.658	0
2628	7	12	4	F17AG	F17AG	576	579	678	663	68	-102	-1.235	0
2628	7	1	5	GAL1	GAL1	125	209	581	581	101	-456	-3.683	0
2628	7	2	5	GAL1	GAL1	119	219	572	578	182	-453	-1.973	0
2628	7	3	5	GAL1-S	GAL1-S	133	179	552	546	46	-419	-7.978	0
2628	7	4	5	GAL1-S	GAL1-S	134	204	555	555	37	-421	-9.486	0
2628	7	5	5	GAL2	GAL2	354	367	526	522	42	-172	-3.69	0
2628	7	6	5	GAL2	GAL2	359	381	590	591	49	-231	-4.286	0
2628	7	7	5	GAL3	GAL3	99	235	639	641	46	-540	-8.826	0
2628	7	8	5	GAL3	GAL3	98	222	664	658	46	-566	-9.478	0
2628	7	9	5	GAL3C-S	GAL3C-S	751	749	684	685	40	67	1.6	0
2628	7	10	5	GAL3C-S	GAL3C-S	775	788	699	698	46	76	1.957	0
2628	7	11	5	GAL7-S	GAL7-S	393	411	716	715	36	-323	-8.444	0
2628	7	12	5	GAL7-S	GAL7-S	313	333	642	623	78	-329	-3.718	0
2628	7	1	6	GAL9	GAL9	165	252	552	555	71	-387	-4.268	0
2628	7	2	6	GAL9	GAL9	138	200	519	520	34	-381	-9.412	0
2628	7	3	6	GNA	GNA	18337	19027	483	479	55	17854	337.236	0
2628	7	4	6	GNA	GNA	15407	14507	450	440	70	14957	200.957	0
2628	7	5	6	GRFT	GRFT	1762	5756	496	495	42	1266	125.262	0
2628	7	6	6	GRFT	GRFT	5661	6645	573	572	40	5088	151.825	0
2628	7	7	6	GS-I;?GSL-I	GS-I;?GSL-I	658	680	615	613	39	43	1.718	0
2628	7	8	6	GS-I;?GSL-I	GS-I;?GSL-I	689	699	639	633	49	50	1.347	0
2628	7	9	6	GS-II; GSL-II	GS-II; GSL-II	471	481	670	670	37	-199	-5.108	0
2628	7	10	6	GS-II; GSL-II	GS-II; GSL-II	477	502	666	664	41	-189	-3.951	0
2628	7	11	6	HHA; HHL	HHA; HHL	10242	8267	676	679	111	9566	68.36	0
2628	7	12	6	HHA; HHL	HHA; HHL	9142	7980	562	577	72	8580	102.819	0
2628	7	1	7	Jacalin	Jacalin	673	678	594	596	41	79	2	0
2628	7	2	7	Jacalin	Jacalin	652	659	558	561	57	94	1.719	0
2628	7	3	7	LBA	LBA	404	412	493	485	70	-89	-1.043	0
2628	7	4	7	LBA	LBA	461	468	431	440	57	30	0.491	0
2628	7	5	7	LcH A	LcH A	698	690	479	476	34	219	6.294	0
2628	7	6	7	LcH A	LcH A	712	713	534	535	38	178	4.684	0
2628	7	7	7	LEA	LEA	620	619	594	592	39	26	0.692	0
2628	7	8	7	LEA	LEA	613	624	593	588	45	20	0.8	0
2628	7	9	7	LENTIL	LENTIL	875	881	608	608	44	267	6.205	0
2628	7	10	7	LENTIL	LENTIL	869	915	598	600	44	271	7.159	0
2628	7	11	7	Lotus	Lotus	426	417	592	592	42	-166	-4.167	0
2628	7	12	7	Lotus	Lotus	407	424	510	510	65	-103	-1.323	0
2628	7	1	8	LSL-N	LSL-N	862	847	624	626	44	238	5.023	0
2628	7	2	8	LSL-N	LSL-N	839	842	589	589	36	250	7.028	0
2628	7	3	8	MAA; MAL	MAA; MAL	2837	2403	532	526	60	2305	31.283	0
2628	7	4	8	MAA; MAL	MAA; MAL	2863	2492	541	539	36	2322	54.25	0
2628	7	5	8	MALECTIN	MALECTIN	527	541	521	495	94	6	0.489	0
2628	7	6	8	MALECTIN	MALECTIN	630	633	555	538	74	75	1.284	0
2628	7	7	8	MOA	MOA	400	494	616	615	39	-216	-3.103	0
2628	7	8	8	MOA	MOA	431	523	623	619	51	-192	-1.882	0
2628	7	9	8	MPL; MPA	MPL; MPA	831	812	622	620	40	209	4.8	0
2628	7	10	8	MPL; MPA	MPL; MPA	842	822	630	631	44	212	4.341	0
2628	7	11	8	NPA	NPA	5939	4980	654	652	39	5285	110.974	0
2628	7	12	8	NPA	NPA	5634	4342	584	598	222	5050	16.865	0
2628	7	1	9	ORYSATA	ORYSATA	610	955	649	661	520	-39	0.565	0
2628	7	2	9	ORYSATA	ORYSATA	650	1004	607	607	35	43	11.343	0
2628	7	3	9	PA-IIL	PA-IIL	302	360	543	538	51	-241	-3.49	0
2628	7	4	9	PA-IIL	PA-IIL	259	370	584	584	32	-325	-6.687	0
2628	7	5	9	PA-IL	PA-IL	460	426	590	586	41	-130	-3.902	0
2628	7	6	9	PA-IL	PA-IL	477	449	621	618	42	-144	-4.024	0
2628	7	7	9	PALa	PALa	358	702	642	630	59	-284	1.22	0
2628	7	8	9	PALa	PALa	415	780	641	637	173	-226	0.827	0
2628	7	9	9	PHA-E	PHA-E	2909	2764	672	670	43	2237	48.698	0
2628	7	10	9	PHA-E	PHA-E	3030	2862	667	665	39	2363	56.333	0
2628	7	11	9	PHA-L	PHA-L	905	908	680	681	62	225	3.661	0
2628	7	12	9	PHA-L	PHA-L	946	946	625	622	71	321	4.563	0
2628	7	1	10	PHA-P	PHA-P	579	589	659	656	41	-80	-1.634	0
2628	7	2	10	PHA-P	PHA-P	561	568	624	622	43	-63	-1.256	0
2628	7	3	10	PNA	PNA	491	487	563	556	50	-72	-1.38	0
2628	7	4	10	PNA	PNA	514	489	600	598	40	-86	-2.725	0
2628	7	5	10	PPL	PPL	539	523	607	601	46	-68	-1.696	0
2628	7	6	10	PPL	PPL	527	514	651	648	37	-124	-3.622	0
2628	7	7	10	PSA/PEA	PSA/PEA	941	934	674	678	116	267	2.207	0
2628	7	8	10	PSA/PEA	PSA/PEA	923	902	675	669	51	248	4.569	0
2628	7	9	10	PSL1A	PSL1A	2695	3323	692	690	39	2003	67.513	0
2628	7	10	10	PSL1A	PSL1A	3000	3912	683	681	40	2317	80.775	0
2628	7	11	10	PTL	PTL	710	675	691	690	37	19	-0.405	0
2628	7	12	10	PTL	PTL	699	696	634	645	446	65	0.114	0
2628	7	1	11	RS-FUC	RS-FUC	593	583	665	663	38	-72	-2.105	0
2628	7	2	11	RS-FUC	RS-FUC	646	591	638	639	34	8	-1.412	0
2628	7	3	11	SAMB	SAMB	12600	12541	584	579	58	12016	206.241	0
2628	7	4	11	SAMB	SAMB	13644	14537	617	630	146	13027	95.253	0
2628	7	5	11	SBA	SBA	371	426	622	616	49	-251	-3.878	0
2628	7	6	11	SBA	SBA	363	420	656	654	37	-293	-6.324	0
2628	7	7	11	SJA	SJA	439	420	685	684	30	-246	-8.8	0
2628	7	8	11	SJA	SJA	477	484	675	672	47	-198	-4	0
2628	7	9	11	SNA-I	SNA-I	2208	2191	687	687	36	1521	41.778	0
2628	7	10	11	SNA-I	SNA-I	4114	3613	688	686	50	3426	58.54	0
2628	7	11	11	SNA-II	SNA-II	629	625	691	687	49	-62	-1.265	0
2628	7	12	11	SNA-II	SNA-II	630	638	648	642	50	-18	-0.08	0
2628	7	1	12	STL	STL	1534	1494	675	674	38	859	21.579	0
2628	7	2	12	STL	STL	1526	1493	644	644	37	882	22.946	0
2628	7	3	12	UDA	UDA	433	442	584	576	52	-151	-2.577	0
2628	7	4	12	UDA	UDA	489	493	631	631	35	-142	-3.943	0
2628	7	5	12	UEA I	UEA I	727	717	638	632	47	89	1.809	0
2628	7	6	12	UEA I	UEA I	756	771	662	661	37	94	2.973	0
2628	7	7	12	UEA-II	UEA-II	599	617	689	687	36	-90	-1.944	0
2628	7	8	12	UEA-II	UEA-II	578	590	683	677	45	-105	-1.933	0
2628	7	9	12	VFA	VFA	684	689	706	703	38	-22	-0.368	0
2628	7	10	12	VFA	VFA	751	764	699	702	54	52	1.148	0
2628	7	11	12	VVA	VVA	7782	7141	699	696	37	7083	174.189	0
2628	7	12	12	VVA	VVA	7701	7121	651	647	51	7050	126.941	0
2628	7	1	13	WFA	WFA	408	447	684	681	40	-276	-5.85	0
2628	7	2	13	WFA	WFA	433	474	653	652	37	-220	-4.811	0
2628	7	3	13	WGA	WGA	615	613	593	588	67	22	0.373	0
2628	7	4	13	WGA	WGA	638	646	629	627	39	9	0.487	0
2628	7	5	13	NEG	NEG	86	211	657	651	48	-571	-9.167	0
2628	7	6	13	NEG	NEG	100	211	676	674	39	-576	-11.872	0
2628	7	7	13	NEG	NEG	140	216	703	705	35	-563	-13.971	0
2628	7	8	13	NEG	NEG	138	185	697	694	48	-559	-10.604	0
2628	7	9	13	POS2	POS2	6781	6646	722	721	42	6059	141.071	0
2628	7	10	13	POS2	POS2	7902	7633	707	709	41	7195	168.878	0
2628	7	11	13	POS1	POS1	20908	19464	706	706	34	20202	551.706	0
2628	7	12	13	POS1	POS1	22711	20317	653	693	1156	22058	16.976	0
3117	8	1	1	POS1	POS1	15591	11998	1285	1282	57	14306	188	0
3117	8	2	1	POS1	POS1	18052	14251	1271	1268	473	16781	27.448	0
3117	8	3	1	POS2	POS2	2304	2871	1255	1260	85	1049	18.953	0
3117	8	4	1	POS2	POS2	2242	3159	1217	1204	70	1025	27.929	0
3117	8	5	1	NEG	NEG	117	394	1127	1123	62	-1010	-11.758	0
3117	8	6	1	NEG	NEG	121	438	1173	1169	55	-1052	-13.291	0
3117	8	7	1	NEG	NEG	128	450	1242	1208	142	-1114	-5.338	0
3117	8	8	1	NEG	NEG	228	561	1301	1262	126	-1073	-5.563	0
3117	8	9	1	AAA	AAA	818	860	1332	1289	127	-514	-3.378	0
3117	8	10	1	AAA	AAA	906	948	1402	1402	49	-496	-9.265	0
3117	8	11	1	AAL	AAL	1224	1227	1412	1368	168	-188	-0.839	0
3117	8	12	1	AAL	AAL	1191	1198	1356	1310	138	-165	-0.812	0
3117	8	1	2	ACG	ACG	1626	1594	1253	1250	53	373	6.491	0
3117	8	2	2	ACG	ACG	1341	1402	1258	1236	102	83	1.627	0
3117	8	3	2	ACL	ACL	764	842	1256	1251	113	-492	-3.619	0
3117	8	4	2	ACL	ACL	729	792	1213	1196	89	-484	-4.539	0
3117	8	5	2	ASA	ASA	5061	5217	1145	1142	57	3916	71.491	0
3117	8	6	2	ASA	ASA	7508	6363	1181	1178	49	6327	105.816	0
3117	8	7	2	BANLEC	BANLEC	7517	6517	1184	1128	189	6333	28.513	0
3117	8	8	2	BANLEC	BANLEC	6861	6760	1260	1189	179	5601	31.123	0
3117	8	9	2	BC2L-A	BC2L-A	1529	1516	1317	1304	156	212	1.359	0
3117	8	10	2	BC2L-A	BC2L-A	1531	1527	1381	1381	50	150	2.92	0
3117	8	11	2	BC2LCN	BC2LCN	963	1022	1415	1370	172	-452	-2.023	0
3117	8	12	2	BC2LCN	BC2LCN	895	982	1369	1326	144	-474	-2.389	0
3117	8	1	3	BPA; BPL	BPA; BPL	875	889	1193	1196	153	-318	-2.007	0
3117	8	2	3	BPA; BPL	BPA; BPL	819	833	1218	1214	491	-399	-0.776	0
3117	8	3	3	CALSEPA	CALSEPA	4981	8127	1214	1215	46	3767	150.261	0
3117	8	4	3	CALSEPA	CALSEPA	6055	10662	1186	1176	72	4869	131.75	0
3117	8	5	3	CGL2	CGL2	1173	1783	1125	1123	53	48	12.453	0
3117	8	6	3	CGL2	CGL2	1376	2158	1171	1168	55	205	18	0
3117	8	7	3	CNL	CNL	914	803	1247	1216	135	-333	-3.059	0
3117	8	8	3	CNL	CNL	974	909	1305	1273	157	-331	-2.318	0
3117	8	9	3	Con A	Con A	1390	1427	1344	1342	73	46	1.164	0
3117	8	10	3	Con A	Con A	1558	1587	1390	1389	55	168	3.6	0
3117	8	11	3	DBA	DBA	958	998	1404	1355	182	-446	-1.962	0
3117	8	12	3	DBA	DBA	870	940	1351	1311	135	-481	-2.748	0
3117	8	1	4	DISCOIDIN I	DISCOIDIN I	374	485	1187	1199	116	-813	-6.155	0
3117	8	2	4	DISCOIDIN I	DISCOIDIN I	363	510	1212	1194	113	-849	-6.053	0
3117	8	3	4	DISCOIDIN II	DISCOIDIN II	696	718	1169	1173	92	-473	-4.946	0
3117	8	4	4	DISCOIDIN II	DISCOIDIN II	690	698	1144	1143	73	-454	-6.096	0
3117	8	5	4	DSA	DSA	2929	2689	1077	1082	61	1852	26.344	0
3117	8	6	4	DSA	DSA	2750	2629	1148	1148	62	1602	23.887	0
3117	8	7	4	ECA	ECA	674	680	1215	1186	142	-541	-3.563	0
3117	8	8	4	ECA	ECA	676	2102	1308	1286	134	-632	6.09	0
3117	8	9	4	EEL	EEL	1073	1125	1315	1305	71	-242	-2.535	0
3117	8	10	4	EEL	EEL	1073	1158	1367	1362	70	-294	-2.914	0
3117	8	11	4	F17AG	F17AG	869	871	1401	1352	178	-532	-2.702	0
3117	8	12	4	F17AG	F17AG	724	743	1331	1287	139	-607	-3.914	0
3117	8	1	5	GAL1	GAL1	148	468	1230	1272	146	-1082	-5.507	0
3117	8	2	5	GAL1	GAL1	199	452	1158	1170	148	-959	-4.851	0
3117	8	3	5	GAL1-S	GAL1-S	300	365	1146	1163	101	-846	-7.901	0
3117	8	4	5	GAL1-S	GAL1-S	246	325	1084	1076	78	-838	-9.628	0
3117	8	5	5	GAL2	GAL2	634	617	1033	1034	63	-399	-6.619	0
3117	8	6	5	GAL2	GAL2	627	636	1123	1129	71	-496	-6.944	0
3117	8	7	5	GAL3	GAL3	170	283	1220	1197	128	-1050	-7.141	0
3117	8	8	5	GAL3	GAL3	157	254	1268	1227	127	-1111	-7.661	0
3117	8	9	5	GAL3C-S	GAL3C-S	1268	1287	1255	1249	63	13	0.603	0
3117	8	10	5	GAL3C-S	GAL3C-S	1371	1389	1355	1353	49	16	0.735	0
3117	8	11	5	GAL7-S	GAL7-S	580	711	1378	1334	175	-798	-3.56	0
3117	8	12	5	GAL7-S	GAL7-S	553	557	1293	1245	147	-740	-4.68	0
3117	8	1	6	GAL9	GAL9	357	479	1178	1211	129	-821	-5.674	0
3117	8	2	6	GAL9	GAL9	256	353	1117	1137	146	-861	-5.37	0
3117	8	3	6	GNA	GNA	24138	25258	1074	1101	118	23064	204.72	0
3117	8	4	6	GNA	GNA	25143	25322	967	989	346	24176	70.327	0
3117	8	5	6	GRFT	GRFT	5613	7643	978	989	93	4635	71.548	0
3117	8	6	6	GRFT	GRFT	7848	8580	1130	1137	83	6718	89.675	0
3117	8	7	6	GS-I;?GSL-I	GS-I;?GSL-I	1213	1194	1159	1142	134	54	0.388	0
3117	8	8	6	GS-I;?GSL-I	GS-I;?GSL-I	1108	1107	1203	1170	129	-95	-0.488	0
3117	8	9	6	GS-II; GSL-II	GS-II; GSL-II	574	625	1221	1218	63	-647	-9.413	0
3117	8	10	6	GS-II; GSL-II	GS-II; GSL-II	551	658	1327	1328	57	-776	-11.754	0
3117	8	11	6	HHA; HHL	HHA; HHL	11792	10494	1314	1275	163	10478	56.558	0
3117	8	12	6	HHA; HHL	HHA; HHL	11357	9988	1178	1135	169	10179	52.385	0
3117	8	1	7	Jacalin	Jacalin	1071	1061	1208	1241	145	-137	-1.241	0
3117	8	2	7	Jacalin	Jacalin	981	977	1185	1206	161	-204	-1.422	0
3117	8	3	7	LBA	LBA	596	584	1093	1131	135	-497	-4.052	0
3117	8	4	7	LBA	LBA	621	629	934	943	121	-313	-2.595	0
3117	8	5	7	LcH A	LcH A	1070	1095	959	963	75	111	1.76	0
3117	8	6	7	LcH A	LcH A	1041	1100	1031	1035	57	10	1.14	0
3117	8	7	7	LEA	LEA	936	945	1075	1050	113	-139	-0.929	0
3117	8	8	7	LEA	LEA	945	957	1048	1023	123	-103	-0.537	0
3117	8	9	7	LENTIL	LENTIL	1199	1235	1152	1149	71	47	1.211	0
3117	8	10	7	LENTIL	LENTIL	1274	1358	1214	1214	61	60	2.361	0
3117	8	11	7	Lotus	Lotus	698	710	1189	1149	157	-491	-2.796	0
3117	8	12	7	Lotus	Lotus	590	595	1037	1005	149	-447	-2.752	0
3117	8	1	8	LSL-N	LSL-N	1346	1446	1203	1224	114	143	1.947	0
3117	8	2	8	LSL-N	LSL-N	1187	1250	1149	1113	210	38	0.652	0
3117	8	3	8	MAA; MAL	MAA; MAL	5383	4700	1114	1143	128	4269	27.789	0
3117	8	4	8	MAA; MAL	MAA; MAL	5817	5075	1004	1009	94	4813	43.255	0
3117	8	5	8	MALECTIN	MALECTIN	996	994	1041	1042	58	-45	-0.828	0
3117	8	6	8	MALECTIN	MALECTIN	999	1029	1107	1113	72	-108	-1.167	0
3117	8	7	8	MOA	MOA	570	668	1159	1141	232	-589	-2.039	0
3117	8	8	8	MOA	MOA	610	721	1201	1168	242	-591	-1.847	0
3117	8	9	8	MPL; MPA	MPL; MPA	1481	1478	1239	1233	66	242	3.712	0
3117	8	10	8	MPL; MPA	MPL; MPA	1496	1529	1302	1300	57	194	4.018	0
3117	8	11	8	NPA	NPA	6783	6276	1292	1247	168	5491	29.935	0
3117	8	12	8	NPA	NPA	4876	4735	1162	1132	169	3714	21.32	0
3117	8	1	9	ORYSATA	ORYSATA	1248	1543	1304	1348	153	-56	1.275	0
3117	8	2	9	ORYSATA	ORYSATA	1195	1442	1214	1227	153	-19	1.405	0
3117	8	3	9	PA-IIL	PA-IIL	748	816	1143	1146	131	-395	-2.519	0
3117	8	4	9	PA-IIL	PA-IIL	850	868	1037	1034	78	-187	-2.128	0
3117	8	5	9	PA-IL	PA-IL	725	695	1119	1122	71	-394	-6.014	0
3117	8	6	9	PA-IL	PA-IL	809	812	1183	1209	566	-374	-0.701	0
3117	8	7	9	PALa	PALa	699	1391	1249	1228	159	-550	1.025	0
3117	8	8	9	PALa	PALa	633	1760	1268	1239	129	-635	4.039	0
3117	8	9	9	PHA-E	PHA-E	3908	3746	1308	1304	58	2600	42.103	0
3117	8	10	9	PHA-E	PHA-E	4830	4665	1344	1346	48	3486	69.146	0
3117	8	11	9	PHA-L	PHA-L	1279	1334	1362	1316	176	-83	0.102	0
3117	8	12	9	PHA-L	PHA-L	1448	1509	1250	1208	174	198	1.73	0
3117	8	1	10	PHA-P	PHA-P	1107	1132	1252	1266	117	-145	-1.145	0
3117	8	2	10	PHA-P	PHA-P	1133	1097	1225	1217	127	-92	-0.945	0
3117	8	3	10	PNA	PNA	914	952	1167	1168	107	-253	-2.019	0
3117	8	4	10	PNA	PNA	560	635	1097	1103	107	-537	-4.374	0
3117	8	5	10	PPL	PPL	1023	1022	1173	1194	120	-150	-1.433	0
3117	8	6	10	PPL	PPL	1039	1054	1221	1230	122	-182	-1.443	0
3117	8	7	10	PSA/PEA	PSA/PEA	1444	1461	1260	1230	134	184	1.724	0
3117	8	8	10	PSA/PEA	PSA/PEA	1361	1362	1265	1225	132	96	1.038	0
3117	8	9	10	PSL1A	PSL1A	3952	4864	1346	1344	73	2606	48.219	0
3117	8	10	10	PSL1A	PSL1A	5473	6700	1382	1384	58	4091	91.655	0
3117	8	11	10	PTL	PTL	1440	1460	1372	1327	170	68	0.782	0
3117	8	12	10	PTL	PTL	1340	1360	1276	1239	153	64	0.791	0
3117	8	1	11	RS-FUC	RS-FUC	1061	941	1252	1262	111	-191	-2.892	0
3117	8	2	11	RS-FUC	RS-FUC	892	875	1220	1216	314	-328	-1.086	0
3117	8	3	11	SAMB	SAMB	20924	20616	1086	1088	85	19838	229.741	0
3117	8	4	11	SAMB	SAMB	21314	22062	1090	1083	70	20224	299.7	0
3117	8	5	11	SBA	SBA	459	601	1177	1178	68	-718	-8.485	0
3117	8	6	11	SBA	SBA	603	734	1238	1249	74	-635	-6.959	0
3117	8	7	11	SJA	SJA	875	948	1276	1243	202	-401	-1.46	0
3117	8	8	11	SJA	SJA	1041	1064	1310	1278	168	-269	-1.274	0
3117	8	9	11	SNA-I	SNA-I	4251	4067	1351	1341	114	2900	23.912	0
3117	8	10	11	SNA-I	SNA-I	6541	6023	1391	1390	52	5150	89.096	0
3117	8	11	11	SNA-II	SNA-II	1024	1089	1397	1342	188	-373	-1.346	0
3117	8	12	11	SNA-II	SNA-II	986	1053	1325	1262	177	-339	-1.181	0
3117	8	1	12	STL	STL	2287	2328	1224	1220	51	1063	21.725	0
3117	8	2	12	STL	STL	2377	2290	1215	1195	103	1162	10.631	0
3117	8	3	12	UDA	UDA	847	856	1120	1115	73	-273	-3.548	0
3117	8	4	12	UDA	UDA	837	833	1107	1098	72	-270	-3.681	0
3117	8	5	12	UEA I	UEA I	1091	1095	1189	1189	57	-98	-1.649	0
3117	8	6	12	UEA I	UEA I	1215	1205	1240	1242	47	-25	-0.787	0
3117	8	7	12	UEA-II	UEA-II	1033	1058	1268	1235	137	-235	-1.292	0
3117	8	8	12	UEA-II	UEA-II	1220	1218	1308	1282	245	-88	-0.261	0
3117	8	9	12	VFA	VFA	1190	1191	1360	1356	61	-170	-2.705	0
3117	8	10	12	VFA	VFA	1247	1259	1403	1407	60	-156	-2.467	0
3117	8	11	12	VVA	VVA	9045	8554	1389	1336	182	7656	39.659	0
3117	8	12	12	VVA	VVA	9160	8721	1322	1280	218	7838	34.133	0
3117	8	1	13	WFA	WFA	610	751	1230	1228	54	-620	-8.833	0
3117	8	2	13	WFA	WFA	513	690	1215	1194	97	-702	-5.196	0
3117	8	3	13	WGA	WGA	1140	1147	1153	1143	72	-13	0.056	0
3117	8	4	13	WGA	WGA	1057	1051	1099	1091	76	-42	-0.526	0
3117	8	5	13	NEG	NEG	169	350	1182	1172	69	-1013	-11.913	0
3117	8	6	13	NEG	NEG	181	386	1249	1249	41	-1068	-21.049	0
3117	8	7	13	NEG	NEG	249	318	1282	1248	133	-1033	-6.992	0
3117	8	8	13	NEG	NEG	298	410	1341	1298	141	-1043	-6.298	0
3117	8	9	13	POS2	POS2	6630	6533	1398	1412	157	5232	32.618	0
3117	8	10	13	POS2	POS2	7759	7031	1406	1408	48	6353	117.146	0
3117	8	11	13	POS1	POS1	21019	19640	1418	1375	176	19601	103.778	0
3117	8	12	13	POS1	POS1	22462	20951	1303	1260	169	21159	116.515	0
2631	9	1	1	POS1	POS1	16928	12902	1061	1058	54	15867	219.333	0
2631	9	2	1	POS1	POS1	18925	14514	1036	1036	50	17889	269.56	0
2631	9	3	1	POS2	POS2	2479	3024	1018	1003	77	1461	26.247	0
2631	9	4	1	POS2	POS2	2426	3388	997	997	46	1429	51.978	0
2631	9	5	1	NEG	NEG	172	411	893	881	80	-721	-5.875	0
2631	9	6	1	NEG	NEG	137	374	998	993	55	-861	-11.255	0
2631	9	7	1	NEG	NEG	179	404	1065	1066	45	-886	-14.711	0
2631	9	8	1	NEG	NEG	166	457	1076	1065	69	-910	-8.812	0
2631	9	9	1	AAA	AAA	756	803	1104	1101	56	-348	-5.321	0
2631	9	10	1	AAA	AAA	879	924	1112	1113	141	-233	-1.34	0
2631	9	11	1	AAL	AAL	1177	1210	1113	1109	63	64	1.603	0
2631	9	12	1	AAL	AAL	1027	1019	1035	1024	91	-8	-0.055	0
2631	9	1	2	ACG	ACG	1118	1094	1045	1039	65	73	0.846	0
2631	9	2	2	ACG	ACG	1364	1281	1033	1032	46	331	5.413	0
2631	9	3	2	ACL	ACL	467	521	1015	1006	80	-548	-6.062	0
2631	9	4	2	ACL	ACL	491	548	996	995	44	-505	-10.159	0
2631	9	5	2	ASA	ASA	3295	4622	911	899	72	2384	51.708	0
2631	9	6	2	ASA	ASA	5901	5783	982	980	75	4919	64.04	0
2631	9	7	2	BANLEC	BANLEC	5101	4040	1055	1056	70	4046	42.629	0
2631	9	8	2	BANLEC	BANLEC	4575	4215	1074	1070	69	3501	45.58	0
2631	9	9	2	BC2L-A	BC2L-A	1331	1248	1105	1107	60	226	2.35	0
2631	9	10	2	BC2L-A	BC2L-A	1270	1187	1108	1109	89	162	0.876	0
2631	9	11	2	BC2LCN	BC2LCN	840	856	1128	1123	58	-288	-4.603	0
2631	9	12	2	BC2LCN	BC2LCN	864	899	1073	1064	66	-209	-2.5	0
2631	9	1	3	BPA; BPL	BPA; BPL	840	849	1015	1014	70	-175	-2.357	0
2631	9	2	3	BPA; BPL	BPA; BPL	858	855	1000	998	51	-142	-2.804	0
2631	9	3	3	CALSEPA	CALSEPA	3744	5185	992	983	80	2752	52.525	0
2631	9	4	3	CALSEPA	CALSEPA	4452	6021	989	991	44	3463	114.318	0
2631	9	5	3	CGL2	CGL2	976	1162	887	878	88	89	3.227	0
2631	9	6	3	CGL2	CGL2	1069	1472	962	961	53	107	9.642	0
2631	9	7	3	CNL	CNL	749	689	1039	1039	54	-290	-6.481	0
2631	9	8	3	CNL	CNL	723	707	1075	1070	73	-352	-4.973	0
2631	9	9	3	Con A	Con A	1201	1219	1109	1109	59	92	1.864	0
2631	9	10	3	Con A	Con A	1384	1397	1105	1104	70	279	4.186	0
2631	9	11	3	DBA	DBA	934	924	1108	1105	103	-174	-1.757	0
2631	9	12	3	DBA	DBA	902	914	1064	1049	83	-162	-1.627	0
2631	9	1	4	DISCOIDIN I	DISCOIDIN I	346	414	986	981	53	-640	-10.698	0
2631	9	2	4	DISCOIDIN I	DISCOIDIN I	351	415	964	962	58	-613	-9.431	0
2631	9	3	4	DISCOIDIN II	DISCOIDIN II	576	647	951	935	84	-375	-3.429	0
2631	9	4	4	DISCOIDIN II	DISCOIDIN II	596	645	948	946	62	-352	-4.855	0
2631	9	5	4	DSA	DSA	2949	2668	877	868	71	2072	25.352	0
2631	9	6	4	DSA	DSA	2723	2507	943	942	52	1780	30.096	0
2631	9	7	4	ECA	ECA	634	1073	995	988	66	-361	1.288	0
2631	9	8	4	ECA	ECA	734	2354	1043	1035	86	-309	15.337	0
2631	9	9	4	EEL	EEL	592	655	1098	1095	85	-506	-5.176	0
2631	9	10	4	EEL	EEL	716	740	1110	1107	58	-394	-6.328	0
2631	9	11	4	F17AG	F17AG	805	813	1119	1118	48	-314	-6.354	0
2631	9	12	4	F17AG	F17AG	796	796	1040	1029	73	-244	-3.192	0
2631	9	1	5	GAL1	GAL1	147	336	939	938	45	-792	-13.378	0
2631	9	2	5	GAL1	GAL1	187	383	912	911	46	-725	-11.478	0
2631	9	3	5	GAL1-S	GAL1-S	197	284	888	885	233	-691	-2.579	0
2631	9	4	5	GAL1-S	GAL1-S	183	290	882	879	46	-699	-12.804	0
2631	9	5	5	GAL2	GAL2	506	486	831	823	64	-325	-5.266	0
2631	9	6	5	GAL2	GAL2	507	510	887	879	71	-380	-5.197	0
2631	9	7	5	GAL3	GAL3	111	185	932	920	82	-821	-8.963	0
2631	9	8	5	GAL3	GAL3	163	295	1013	998	87	-850	-8.08	0
2631	9	9	5	GAL3C-S	GAL3C-S	1139	1177	1066	1069	65	73	1.662	0
2631	9	10	5	GAL3C-S	GAL3C-S	1135	1165	1076	1074	67	59	1.358	0
2631	9	11	5	GAL7-S	GAL7-S	447	516	1094	1096	131	-647	-4.427	0
2631	9	12	5	GAL7-S	GAL7-S	397	433	972	971	155	-575	-3.471	0
2631	9	1	6	GAL9	GAL9	244	314	892	889	49	-648	-11.735	0
2631	9	2	6	GAL9	GAL9	245	310	865	867	60	-620	-9.283	0
2631	9	3	6	GNA	GNA	17178	18661	808	789	88	16370	203.091	0
2631	9	4	6	GNA	GNA	18139	19160	682	669	134	17457	137.993	0
2631	9	5	6	GRFT	GRFT	2928	6354	676	681	93	2252	61	0
2631	9	6	6	GRFT	GRFT	6918	7337	890	880	76	6028	84.961	0
2631	9	7	6	GS-I;?GSL-I	GS-I;?GSL-I	1019	1034	984	985	46	35	1.065	0
2631	9	8	6	GS-I;?GSL-I	GS-I;?GSL-I	949	971	981	977	178	-32	-0.034	0
2631	9	9	6	GS-II; GSL-II	GS-II; GSL-II	640	672	1003	983	92	-363	-3.38	0
2631	9	10	6	GS-II; GSL-II	GS-II; GSL-II	568	647	1052	1051	64	-484	-6.312	0
2631	9	11	6	HHA; HHL	HHA; HHL	11571	9644	1020	1020	56	10551	154	0
2631	9	12	6	HHA; HHL	HHA; HHL	10036	8603	865	866	90	9171	85.967	0
2631	9	1	7	Jacalin	Jacalin	976	984	923	928	102	53	0.549	0
2631	9	2	7	Jacalin	Jacalin	940	933	924	933	126	16	0	0
2631	9	3	7	LBA	LBA	610	646	821	794	123	-211	-1.203	0
2631	9	4	7	LBA	LBA	657	659	664	650	128	-7	0.07	0
2631	9	5	7	LcH A	LcH A	908	948	803	803	67	105	2.164	0
2631	9	6	7	LcH A	LcH A	907	956	873	871	58	34	1.466	0
2631	9	7	7	LEA	LEA	956	945	949	952	72	7	-0.097	0
2631	9	8	7	LEA	LEA	1000	990	958	950	76	42	0.526	0
2631	9	9	7	LENTIL	LENTIL	984	1010	970	968	143	14	0.294	0
2631	9	10	7	LENTIL	LENTIL	1032	1072	965	961	55	67	2.018	0
2631	9	11	7	Lotus	Lotus	769	758	966	954	95	-197	-2.063	0
2631	9	12	7	Lotus	Lotus	683	699	868	861	110	-185	-1.473	0
2631	9	1	8	LSL-N	LSL-N	1244	1257	984	989	78	260	3.436	0
2631	9	2	8	LSL-N	LSL-N	1346	1299	925	931	75	421	4.907	0
2631	9	3	8	MAA; MAL	MAA; MAL	4113	3643	855	844	79	3258	35.43	0
2631	9	4	8	MAA; MAL	MAA; MAL	4246	3708	886	890	63	3360	44.73	0
2631	9	5	8	MALECTIN	MALECTIN	828	829	898	889	66	-70	-0.909	0
2631	9	6	8	MALECTIN	MALECTIN	823	827	961	960	72	-138	-1.847	0
2631	9	7	8	MOA	MOA	452	613	1004	1004	64	-552	-6.109	0
2631	9	8	8	MOA	MOA	475	635	1007	1000	78	-532	-4.679	0
2631	9	9	8	MPL; MPA	MPL; MPA	1394	1300	1021	1018	47	373	6	0
2631	9	10	8	MPL; MPA	MPL; MPA	1256	1228	1030	1027	61	226	3.295	0
2631	9	11	8	NPA	NPA	6106	5467	1062	1061	47	5044	93.745	0
2631	9	12	8	NPA	NPA	6348	5164	984	983	75	5364	55.747	0
2631	9	1	9	ORYSATA	ORYSATA	1007	1434	1006	1014	84	1	5	0
2631	9	2	9	ORYSATA	ORYSATA	1005	1777	957	961	67	48	12.179	0
2631	9	3	9	PA-IIL	PA-IIL	684	652	880	880	93	-196	-2.452	0
2631	9	4	9	PA-IIL	PA-IIL	418	581	933	933	45	-515	-7.822	0
2631	9	5	9	PA-IL	PA-IL	627	603	953	947	77	-326	-4.468	0
2631	9	6	9	PA-IL	PA-IL	663	641	1017	1016	69	-354	-5.435	0
2631	9	7	9	PALa	PALa	563	910	1045	1047	43	-482	-3.186	0
2631	9	8	9	PALa	PALa	583	1003	1056	1050	96	-473	-0.49	0
2631	9	9	9	PHA-E	PHA-E	4432	4325	1074	1072	57	3358	57.07	0
2631	9	10	9	PHA-E	PHA-E	4702	4542	1070	1065	54	3632	64.389	0
2631	9	11	9	PHA-L	PHA-L	1186	1202	1101	1098	53	85	1.962	0
2631	9	12	9	PHA-L	PHA-L	1254	1285	1039	1030	68	215	3.75	0
2631	9	1	10	PHA-P	PHA-P	818	862	1031	1037	92	-213	-1.902	0
2631	9	2	10	PHA-P	PHA-P	772	807	972	977	82	-200	-2.073	0
2631	9	3	10	PNA	PNA	629	686	895	888	81	-266	-2.494	0
2631	9	4	10	PNA	PNA	690	744	954	953	65	-264	-3.215	0
2631	9	5	10	PPL	PPL	828	815	978	973	81	-150	-1.951	0
2631	9	6	10	PPL	PPL	800	792	1014	1011	53	-214	-4.132	0
2631	9	7	10	PSA/PEA	PSA/PEA	1226	1234	1070	1072	45	156	3.6	0
2631	9	8	10	PSA/PEA	PSA/PEA	1228	1224	1058	1047	64	170	2.766	0
2631	9	9	10	PSL1A	PSL1A	2296	3293	1093	1091	67	1203	32.866	0
2631	9	10	10	PSL1A	PSL1A	3679	4058	1096	1095	94	2583	31.521	0
2631	9	11	10	PTL	PTL	1131	1126	1115	1112	46	16	0.304	0
2631	9	12	10	PTL	PTL	1113	1123	1062	1054	69	51	1	0
2631	9	1	11	RS-FUC	RS-FUC	902	843	1064	1070	82	-162	-2.768	0
2631	9	2	11	RS-FUC	RS-FUC	1132	1088	1014	1015	60	118	1.217	0
2631	9	3	11	SAMB	SAMB	18827	19467	916	919	129	17911	143.783	0
2631	9	4	11	SAMB	SAMB	15069	15453	975	981	60	14094	241.2	0
2631	9	5	11	SBA	SBA	504	613	995	987	74	-491	-5.054	0
2631	9	6	11	SBA	SBA	539	632	1036	1041	69	-497	-5.928	0
2631	9	7	11	SJA	SJA	857	842	1067	1057	106	-210	-2.028	0
2631	9	8	11	SJA	SJA	928	893	1069	1050	90	-141	-1.744	0
2631	9	9	11	SNA-I	SNA-I	3816	3608	1102	1100	46	2714	54.522	0
2631	9	10	11	SNA-I	SNA-I	5626	4965	1117	1111	54	4509	71.37	0
2631	9	11	11	SNA-II	SNA-II	980	973	1124	1117	68	-144	-2.118	0
2631	9	12	11	SNA-II	SNA-II	905	924	1072	1060	77	-167	-1.766	0
2631	9	1	12	STL	STL	2025	2003	1037	1033	57	988	17.018	0
2631	9	2	12	STL	STL	2064	2009	991	992	49	1073	20.755	0
2631	9	3	12	UDA	UDA	665	674	921	927	272	-256	-0.93	0
2631	9	4	12	UDA	UDA	793	795	993	1009	258	-200	-0.829	0
2631	9	5	12	UEA I	UEA I	1073	1091	1010	1008	92	63	0.902	0
2631	9	6	12	UEA I	UEA I	1005	1046	1037	1036	49	-32	0.204	0
2631	9	7	12	UEA-II	UEA-II	1108	1082	1072	1101	403	36	-0.047	0
2631	9	8	12	UEA-II	UEA-II	910	919	1071	1060	65	-161	-2.169	0
2631	9	9	12	VFA	VFA	1169	1202	1112	1112	64	57	1.406	0
2631	9	10	12	VFA	VFA	1095	1094	1102	1097	58	-7	-0.052	0
2631	9	11	12	VVA	VVA	7410	6673	1139	1138	51	6271	108.529	0
2631	9	12	12	VVA	VVA	7202	6775	1077	1062	75	6125	76.173	0
2631	9	1	13	WFA	WFA	574	678	1026	1016	89	-452	-3.798	0
2631	9	2	13	WFA	WFA	558	615	1016	1018	69	-458	-5.841	0
2631	9	3	13	WGA	WGA	966	965	923	915	77	43	0.649	0
2631	9	4	13	WGA	WGA	1043	1027	981	982	58	62	0.776	0
2631	9	5	13	NEG	NEG	122	301	1016	1005	65	-894	-10.831	0
2631	9	6	13	NEG	NEG	116	360	1034	1028	55	-918	-12.145	0
2631	9	7	13	NEG	NEG	234	321	1087	1087	43	-853	-17.814	0
2631	9	8	13	NEG	NEG	230	339	1081	1070	69	-851	-10.594	0
2631	9	9	13	POS2	POS2	6810	6491	1105	1103	50	5705	107.76	0
2631	9	10	13	POS2	POS2	7387	6842	1093	1086	65	6294	88.554	0
2631	9	11	13	POS1	POS1	20502	19023	1145	1143	49	19357	364.898	0
2631	9	12	13	POS1	POS1	22252	19963	1080	1073	70	21172	269.857	0
3118	10	1	1	POS1	POS1	16189	12028	1502	1501	56	14687	187.982	0
3118	10	2	1	POS1	POS1	18982	14120	1505	1484	112	17477	112.821	0
3118	10	3	1	POS2	POS2	2386	3038	1509	1511	48	877	31.813	0
3118	10	4	1	POS2	POS2	2432	3418	1466	1452	79	966	24.886	0
3118	10	5	1	NEG	NEG	161	535	1376	1374	66	-1215	-12.712	0
3118	10	6	1	NEG	NEG	171	521	1504	1506	53	-1333	-18.585	0
3118	10	7	1	NEG	NEG	174	538	1579	1552	413	-1405	-2.455	0
3118	10	8	1	NEG	NEG	183	573	1663	1618	155	-1480	-6.742	0
3118	10	9	1	AAA	AAA	1092	1161	1724	1720	109	-632	-5.128	0
3118	10	10	1	AAA	AAA	1022	1137	1784	1787	65	-762	-10	0
3118	10	11	1	AAL	AAL	1610	1627	1763	1700	229	-153	-0.319	0
3118	10	12	1	AAL	AAL	1647	1666	1702	1619	221	-55	0.213	0
3118	10	1	2	ACG	ACG	1617	1660	1452	1451	81	165	2.58	0
3118	10	2	2	ACG	ACG	1610	1604	1471	1450	122	139	1.262	0
3118	10	3	2	ACL	ACL	1031	1010	1476	1466	103	-445	-4.427	0
3118	10	4	2	ACL	ACL	918	1011	1439	1422	113	-521	-3.637	0
3118	10	5	2	ASA	ASA	6745	6027	1376	1371	66	5369	70.545	0
3118	10	6	2	ASA	ASA	8670	7299	1503	1501	57	7167	101.719	0
3118	10	7	2	BANLEC	BANLEC	7370	6085	1613	1570	192	5757	23.516	0
3118	10	8	2	BANLEC	BANLEC	6984	6142	1660	1604	178	5324	25.494	0
3118	10	9	2	BC2L-A	BC2L-A	1544	1584	1725	1725	89	-181	-1.584	0
3118	10	10	2	BC2L-A	BC2L-A	1461	1507	1795	1794	70	-334	-4.1	0
3118	10	11	2	BC2LCN	BC2LCN	1101	1134	1791	1729	231	-690	-2.576	0
3118	10	12	2	BC2LCN	BC2LCN	1040	1056	1698	1612	210	-658	-2.648	0
3118	10	1	3	BPA; BPL	BPA; BPL	1161	1204	1407	1420	137	-246	-1.577	0
3118	10	2	3	BPA; BPL	BPA; BPL	1010	1030	1431	1428	432	-421	-0.921	0
3118	10	3	3	CALSEPA	CALSEPA	5121	7841	1443	1450	73	3678	87.548	0
3118	10	4	3	CALSEPA	CALSEPA	6784	10884	1439	1431	104	5345	90.894	0
3118	10	5	3	CGL2	CGL2	1386	2017	1372	1379	80	14	7.975	0
3118	10	6	3	CGL2	CGL2	1497	2162	1499	1503	77	-2	8.558	0
3118	10	7	3	CNL	CNL	1187	1105	1592	1561	173	-405	-2.636	0
3118	10	8	3	CNL	CNL	1349	1228	1661	1585	228	-312	-1.566	0
3118	10	9	3	Con A	Con A	1424	1431	1716	1718	95	-292	-3.021	0
3118	10	10	3	Con A	Con A	1607	1616	1779	1761	120	-172	-1.208	0
3118	10	11	3	DBA	DBA	1024	1144	1790	1725	238	-766	-2.441	0
3118	10	12	3	DBA	DBA	982	1078	1671	1564	252	-689	-1.929	0
3118	10	1	4	DISCOIDIN I	DISCOIDIN I	406	542	1437	1433	73	-1031	-12.205	0
3118	10	2	4	DISCOIDIN I	DISCOIDIN I	419	607	1467	1452	143	-1048	-5.909	0
3118	10	3	4	DISCOIDIN II	DISCOIDIN II	894	907	1424	1431	80	-530	-6.55	0
3118	10	4	4	DISCOIDIN II	DISCOIDIN II	536	635	1385	1385	112	-849	-6.696	0
3118	10	5	4	DSA	DSA	3810	3431	1304	1311	93	2506	22.796	0
3118	10	6	4	DSA	DSA	3495	3292	1467	1482	136	2028	13.309	0
3118	10	7	4	ECA	ECA	806	815	1546	1542	666	-740	-1.092	0
3118	10	8	4	ECA	ECA	795	844	1646	1627	351	-851	-2.231	0
3118	10	9	4	EEL	EEL	863	899	1690	1670	108	-827	-7.139	0
3118	10	10	4	EEL	EEL	898	995	1774	1757	111	-876	-6.865	0
3118	10	11	4	F17AG	F17AG	1053	1054	1779	1718	228	-726	-2.912	0
3118	10	12	4	F17AG	F17AG	874	924	1644	1532	254	-770	-2.394	0
3118	10	1	5	GAL1	GAL1	266	588	1461	1519	191	-1195	-4.874	0
3118	10	2	5	GAL1	GAL1	239	516	1448	1470	212	-1209	-4.5	0
3118	10	3	5	GAL1-S	GAL1-S	283	405	1412	1464	343	-1129	-3.087	0
3118	10	4	5	GAL1-S	GAL1-S	242	425	1324	1319	110	-1082	-8.127	0
3118	10	5	5	GAL2	GAL2	706	696	1255	1261	103	-549	-5.485	0
3118	10	6	5	GAL2	GAL2	725	735	1433	1442	108	-708	-6.546	0
3118	10	7	5	GAL3	GAL3	220	346	1536	1503	168	-1316	-6.887	0
3118	10	8	5	GAL3	GAL3	156	376	1581	1517	182	-1425	-6.269	0
3118	10	9	5	GAL3C-S	GAL3C-S	1595	1611	1538	1487	185	57	0.67	0
3118	10	10	5	GAL3C-S	GAL3C-S	1739	1765	1702	1654	178	37	0.624	0
3118	10	11	5	GAL7-S	GAL7-S	688	817	1769	1704	233	-1081	-3.807	0
3118	10	12	5	GAL7-S	GAL7-S	572	604	1621	1509	256	-1049	-3.535	0
3118	10	1	6	GAL9	GAL9	455	574	1409	1448	158	-954	-5.532	0
3118	10	2	6	GAL9	GAL9	309	440	1402	1454	699	-1093	-1.451	0
3118	10	3	6	GNA	GNA	21132	19622	1332	1374	168	19800	108.619	0
3118	10	4	6	GNA	GNA	18892	18556	1133	1134	150	17759	116.147	0
3118	10	5	6	GRFT	GRFT	5230	6804	1178	1183	102	4052	55.108	0
3118	10	6	6	GRFT	GRFT	6824	7742	1388	1404	104	5436	60.942	0
3118	10	7	6	GS-I;?GSL-I	GS-I;?GSL-I	1238	1244	1454	1419	160	-216	-1.094	0
3118	10	8	6	GS-I;?GSL-I	GS-I;?GSL-I	1316	1348	1529	1479	168	-213	-0.78	0
3118	10	9	6	GS-II; GSL-II	GS-II; GSL-II	698	754	1584	1544	158	-886	-5	0
3118	10	10	6	GS-II; GSL-II	GS-II; GSL-II	633	803	1703	1706	79	-1070	-11.43	0
3118	10	11	6	HHA; HHL	HHA; HHL	12411	11270	1697	1653	205	10714	46.912	0
3118	10	12	6	HHA; HHL	HHA; HHL	11880	9974	1517	1452	221	10363	38.561	0
3118	10	1	7	Jacalin	Jacalin	1114	1141	1495	1531	146	-381	-2.671	0
3118	10	2	7	Jacalin	Jacalin	1110	1096	1434	1477	700	-324	-0.544	0
3118	10	3	7	LBA	LBA	724	733	1335	1366	157	-611	-4.032	0
3118	10	4	7	LBA	LBA	1043	1049	1111	1099	168	-68	-0.298	0
3118	10	5	7	LcH A	LcH A	1082	1107	1163	1147	107	-81	-0.374	0
3118	10	6	7	LcH A	LcH A	1267	1305	1302	1302	60	-35	0.05	0
3118	10	7	7	LEA	LEA	1243	1236	1405	1389	333	-162	-0.459	0
3118	10	8	7	LEA	LEA	1382	1366	1468	1425	157	-86	-0.376	0
3118	10	9	7	LENTIL	LENTIL	1473	1450	1531	1541	346	-58	-0.263	0
3118	10	10	7	LENTIL	LENTIL	1545	1531	1600	1602	86	-55	-0.826	0
3118	10	11	7	Lotus	Lotus	892	933	1585	1531	214	-693	-2.794	0
3118	10	12	7	Lotus	Lotus	754	778	1362	1329	205	-608	-2.688	0
3118	10	1	8	LSL-N	LSL-N	1617	1734	1448	1471	123	169	2.138	0
3118	10	2	8	LSL-N	LSL-N	1494	1572	1449	1458	177	45	0.644	0
3118	10	3	8	MAA; MAL	MAA; MAL	5609	4953	1386	1397	136	4223	26.147	0
3118	10	4	8	MAA; MAL	MAA; MAL	5303	4889	1247	1256	113	4056	32.15	0
3118	10	5	8	MALECTIN	MALECTIN	1182	1199	1338	1333	77	-156	-1.74	0
3118	10	6	8	MALECTIN	MALECTIN	1210	1243	1410	1412	65	-200	-2.6	0
3118	10	7	8	MOA	MOA	566	637	1498	1469	155	-932	-5.368	0
3118	10	8	8	MOA	MOA	630	725	1554	1526	176	-924	-4.551	0
3118	10	9	8	MPL; MPA	MPL; MPA	1904	1900	1623	1613	86	281	3.337	0
3118	10	10	8	MPL; MPA	MPL; MPA	1806	1831	1689	1695	75	117	1.813	0
3118	10	11	8	NPA	NPA	7069	6655	1735	1677	223	5334	22.323	0
3118	10	12	8	NPA	NPA	7006	6197	1575	1482	267	5431	17.659	0
3118	10	1	9	ORYSATA	ORYSATA	1324	1386	1578	1623	165	-254	-1.436	0
3118	10	2	9	ORYSATA	ORYSATA	1335	1598	1540	1570	196	-205	0.143	0
3118	10	3	9	PA-IIL	PA-IIL	695	839	1407	1427	367	-712	-1.602	0
3118	10	4	9	PA-IIL	PA-IIL	894	881	1328	1320	86	-434	-5.105	0
3118	10	5	9	PA-IL	PA-IL	978	933	1416	1415	91	-438	-5.297	0
3118	10	6	9	PA-IL	PA-IL	1125	1095	1510	1515	90	-385	-4.667	0
3118	10	7	9	PALa	PALa	840	1267	1569	1536	197	-729	-1.365	0
3118	10	8	9	PALa	PALa	933	1176	1644	1607	171	-711	-2.52	0
3118	10	9	9	PHA-E	PHA-E	4100	3998	1678	1677	77	2422	30.143	0
3118	10	10	9	PHA-E	PHA-E	4828	4476	1734	1738	71	3094	38.563	0
3118	10	11	9	PHA-L	PHA-L	1541	1551	1787	1732	220	-246	-0.823	0
3118	10	12	9	PHA-L	PHA-L	1774	1790	1698	1583	248	76	0.835	0
3118	10	1	10	PHA-P	PHA-P	1359	1360	1482	1505	131	-123	-1.107	0
3118	10	2	10	PHA-P	PHA-P	1209	1207	1487	1495	173	-278	-1.665	0
3118	10	3	10	PNA	PNA	997	1092	1422	1447	171	-425	-2.076	0
3118	10	4	10	PNA	PNA	974	1063	1390	1386	125	-416	-2.584	0
3118	10	5	10	PPL	PPL	1280	1262	1476	1475	95	-196	-2.242	0
3118	10	6	10	PPL	PPL	1226	1241	1535	1546	118	-309	-2.585	0
3118	10	7	10	PSA/PEA	PSA/PEA	1697	1713	1616	1583	213	81	0.61	0
3118	10	8	10	PSA/PEA	PSA/PEA	1561	1577	1660	1611	174	-99	-0.195	0
3118	10	9	10	PSL1A	PSL1A	4456	5139	1719	1715	70	2737	48.914	0
3118	10	10	10	PSL1A	PSL1A	4995	6332	1755	1754	57	3240	80.316	0
3118	10	11	10	PTL	PTL	1830	1848	1800	1733	225	30	0.511	0
3118	10	12	10	PTL	PTL	1777	1804	1691	1591	243	86	0.877	0
3118	10	1	11	RS-FUC	RS-FUC	1060	1007	1607	1637	156	-547	-4.038	0
3118	10	2	11	RS-FUC	RS-FUC	1226	1170	1512	1529	175	-286	-2.051	0
3118	10	3	11	SAMB	SAMB	23368	24225	1393	1393	105	21975	217.448	0
3118	10	4	11	SAMB	SAMB	27298	26505	1394	1396	104	25904	241.433	0
3118	10	5	11	SBA	SBA	667	837	1481	1487	116	-814	-5.603	0
3118	10	6	11	SBA	SBA	704	849	1529	1522	134	-825	-5.022	0
3118	10	7	11	SJA	SJA	1272	1307	1623	1570	258	-351	-1.019	0
3118	10	8	11	SJA	SJA	1337	1310	1697	1643	216	-360	-1.542	0
3118	10	9	11	SNA-I	SNA-I	3895	5914	1739	1734	78	2156	53.59	0
3118	10	10	11	SNA-I	SNA-I	4518	4399	1779	1781	64	2739	40.906	0
3118	10	11	11	SNA-II	SNA-II	1423	1475	1813	1746	237	-390	-1.143	0
3118	10	12	11	SNA-II	SNA-II	1292	1372	1723	1619	243	-431	-1.016	0
3118	10	1	12	STL	STL	2324	2408	1488	1498	87	836	10.46	0
3118	10	2	12	STL	STL	2226	2158	1454	1431	116	772	6.267	0
3118	10	3	12	UDA	UDA	1013	1016	1372	1374	83	-359	-4.313	0
3118	10	4	12	UDA	UDA	1079	1067	1407	1412	122	-328	-2.828	0
3118	10	5	12	UEA I	UEA I	1781	1837	1506	1518	132	275	2.417	0
3118	10	6	12	UEA I	UEA I	2183	2089	1589	1599	108	594	4.537	0
3118	10	7	12	UEA-II	UEA-II	1487	1627	1634	1595	198	-147	0.162	0
3118	10	8	12	UEA-II	UEA-II	1356	1397	1721	1664	191	-365	-1.398	0
3118	10	9	12	VFA	VFA	1410	1432	1751	1692	258	-341	-1.008	0
3118	10	10	12	VFA	VFA	1623	1631	1806	1811	76	-183	-2.368	0
3118	10	11	12	VVA	VVA	8662	8307	1821	1763	225	6841	29.084	0
3118	10	12	12	VVA	VVA	8656	8013	1635	1545	264	7021	24.5	0
3118	10	1	13	WFA	WFA	672	873	1488	1490	73	-816	-8.452	0
3118	10	2	13	WFA	WFA	627	848	1465	1455	157	-838	-3.866	0
3118	10	3	13	WGA	WGA	1346	1341	1396	1398	124	-50	-0.46	0
3118	10	4	13	WGA	WGA	1364	1390	1392	1393	110	-28	-0.027	0
3118	10	5	13	NEG	NEG	223	527	1506	1509	135	-1283	-7.274	0
3118	10	6	13	NEG	NEG	213	467	1588	1595	139	-1375	-8.115	0
3118	10	7	13	NEG	NEG	594	893	1650	1592	267	-1056	-2.618	0
3118	10	8	13	NEG	NEG	744	799	1719	1623	303	-975	-2.719	0
3118	10	9	13	POS2	POS2	7083	7080	1779	1773	106	5304	50.066	0
3118	10	10	13	POS2	POS2	8310	7449	1789	1790	61	6521	92.77	0
3118	10	11	13	POS1	POS1	21457	19579	1826	1777	216	19631	82.417	0
3118	10	12	13	POS1	POS1	22573	19970	1662	1574	258	20911	71.302	0
2635	11	1	1	POS1	POS1	16077	12269	1367	1360	66	14710	165.288	0
2635	11	2	1	POS1	POS1	18661	14380	1360	1359	68	17301	191.485	0
2635	11	3	1	POS2	POS2	2511	3193	1362	1341	104	1149	17.808	0
2635	11	4	1	POS2	POS2	2457	3498	1320	1303	99	1137	22.172	0
2635	11	5	1	NEG	NEG	192	620	1289	1267	102	-1097	-6.343	0
2635	11	6	1	NEG	NEG	168	570	1377	1368	75	-1209	-10.64	0
2635	11	7	1	NEG	NEG	203	544	1386	1376	92	-1183	-9.043	0
2635	11	8	1	NEG	NEG	194	609	1427	1416	122	-1233	-6.615	0
2635	11	9	1	AAA	AAA	1048	1083	1452	1453	79	-404	-4.684	0
2635	11	10	1	AAA	AAA	987	1026	1448	1418	152	-461	-2.579	0
2635	11	11	1	AAL	AAL	1336	1306	1501	1495	62	-165	-3.048	0
2635	11	12	1	AAL	AAL	1211	1218	1464	1458	75	-253	-3.2	0
2635	11	1	2	ACG	ACG	1697	1616	1347	1337	72	350	3.875	0
2635	11	2	2	ACG	ACG	1693	1608	1314	1311	57	379	5.211	0
2635	11	3	2	ACL	ACL	779	846	1342	1312	128	-563	-3.641	0
2635	11	4	2	ACL	ACL	872	926	1326	1295	111	-454	-3.324	0
2635	11	5	2	ASA	ASA	3781	5331	1261	1242	110	2520	37.173	0
2635	11	6	2	ASA	ASA	6725	6520	1364	1368	92	5361	56	0
2635	11	7	2	BANLEC	BANLEC	6723	6038	1401	1401	57	5322	81.351	0
2635	11	8	2	BANLEC	BANLEC	6339	5285	1393	1373	116	4946	33.724	0
2635	11	9	2	BC2L-A	BC2L-A	1378	1404	1427	1423	59	-49	-0.322	0
2635	11	10	2	BC2L-A	BC2L-A	1539	1486	1460	1451	69	79	0.507	0
2635	11	11	2	BC2LCN	BC2LCN	1180	1187	1514	1510	56	-334	-5.768	0
2635	11	12	2	BC2LCN	BC2LCN	1158	1199	1479	1467	83	-321	-3.229	0
2635	11	1	3	BPA; BPL	BPA; BPL	1115	1137	1357	1351	78	-242	-2.744	0
2635	11	2	3	BPA; BPL	BPA; BPL	1215	1211	1303	1300	71	-88	-1.254	0
2635	11	3	3	CALSEPA	CALSEPA	4119	6017	1325	1308	101	2794	46.624	0
2635	11	4	3	CALSEPA	CALSEPA	4773	7020	1322	1322	48	3451	118.708	0
2635	11	5	3	CGL2	CGL2	1407	1619	1226	1237	243	181	1.572	0
2635	11	6	3	CGL2	CGL2	1573	1978	1350	1350	86	223	7.302	0
2635	11	7	3	CNL	CNL	1141	982	1418	1419	54	-277	-8.093	0
2635	11	8	3	CNL	CNL	805	856	1376	1364	84	-571	-6.048	0
2635	11	9	3	Con A	Con A	1672	1682	1432	1425	61	240	4.213	0
2635	11	10	3	Con A	Con A	1757	1760	1462	1454	69	295	4.435	0
2635	11	11	3	DBA	DBA	1068	1108	1501	1494	59	-433	-6.542	0
2635	11	12	3	DBA	DBA	999	1086	1479	1468	73	-480	-5.233	0
2635	11	1	4	DISCOIDIN I	DISCOIDIN I	384	485	1348	1343	66	-964	-13	0
2635	11	2	4	DISCOIDIN I	DISCOIDIN I	408	507	1298	1294	64	-890	-12.297	0
2635	11	3	4	DISCOIDIN II	DISCOIDIN II	721	764	1281	1266	86	-560	-5.837	0
2635	11	4	4	DISCOIDIN II	DISCOIDIN II	729	746	1297	1284	83	-568	-6.482	0
2635	11	5	4	DSA	DSA	3076	2876	1133	1054	207	1943	8.802	0
2635	11	6	4	DSA	DSA	3292	3211	1316	1321	107	1976	17.664	0
2635	11	7	4	ECA	ECA	798	808	1389	1415	332	-591	-1.828	0
2635	11	8	4	ECA	ECA	832	855	1404	1384	113	-572	-4.681	0
2635	11	9	4	EEL	EEL	1357	1369	1399	1394	69	-42	-0.362	0
2635	11	10	4	EEL	EEL	1454	1470	1468	1456	75	-14	0.187	0
2635	11	11	4	F17AG	F17AG	1112	1133	1492	1487	60	-380	-5.9	0
2635	11	12	4	F17AG	F17AG	1095	1129	1464	1456	74	-369	-4.419	0
2635	11	1	5	GAL1	GAL1	265	455	1340	1332	72	-1075	-12.181	0
2635	11	2	5	GAL1	GAL1	253	474	1300	1304	115	-1047	-7.217	0
2635	11	3	5	GAL1-S	GAL1-S	256	390	1246	1239	221	-990	-3.842	0
2635	11	4	5	GAL1-S	GAL1-S	293	431	1253	1242	81	-960	-10.012	0
2635	11	5	5	GAL2	GAL2	826	797	1138	1111	107	-312	-2.935	0
2635	11	6	5	GAL2	GAL2	851	852	1313	1306	68	-462	-6.676	0
2635	11	7	5	GAL3	GAL3	208	299	1373	1376	52	-1165	-20.712	0
2635	11	8	5	GAL3	GAL3	208	342	1410	1396	89	-1202	-11.843	0
2635	11	9	5	GAL3C-S	GAL3C-S	1490	1521	1413	1410	95	77	1.168	0
2635	11	10	5	GAL3C-S	GAL3C-S	1451	1504	1411	1404	121	40	0.826	0
2635	11	11	5	GAL7-S	GAL7-S	668	772	1479	1476	56	-811	-12.571	0
2635	11	12	5	GAL7-S	GAL7-S	582	637	1436	1429	72	-854	-11	0
2635	11	1	6	GAL9	GAL9	365	535	1283	1291	96	-918	-7.875	0
2635	11	2	6	GAL9	GAL9	374	460	1248	1282	1012	-874	-0.812	0
2635	11	3	6	GNA	GNA	20643	20335	1180	1179	208	19463	92.096	0
2635	11	4	6	GNA	GNA	19586	18594	1088	1050	179	18498	98.011	0
2635	11	5	6	GRFT	GRFT	2202	6565	1118	1097	158	1084	34.608	0
2635	11	6	6	GRFT	GRFT	5483	7140	1294	1298	93	4189	62.817	0
2635	11	7	6	GS-I;?GSL-I	GS-I;?GSL-I	1217	1256	1353	1351	53	-136	-1.792	0
2635	11	8	6	GS-I;?GSL-I	GS-I;?GSL-I	1341	1396	1379	1364	90	-38	0.356	0
2635	11	9	6	GS-II; GSL-II	GS-II; GSL-II	704	760	1405	1402	58	-701	-11.069	0
2635	11	10	6	GS-II; GSL-II	GS-II; GSL-II	725	783	1384	1378	79	-659	-7.532	0
2635	11	11	6	HHA; HHL	HHA; HHL	11766	9769	1415	1408	77	10351	108.584	0
2635	11	12	6	HHA; HHL	HHA; HHL	9938	8457	1356	1347	102	8582	69.706	0
2635	11	1	7	Jacalin	Jacalin	1066	1079	1305	1305	177	-239	-1.277	0
2635	11	2	7	Jacalin	Jacalin	1165	1198	1282	1287	104	-117	-0.856	0
2635	11	3	7	LBA	LBA	816	837	1174	1169	115	-358	-2.887	0
2635	11	4	7	LBA	LBA	1005	1005	1135	1106	121	-130	-0.835	0
2635	11	5	7	LcH A	LcH A	1329	1406	1191	1182	88	138	2.545	0
2635	11	6	7	LcH A	LcH A	1194	1244	1260	1259	61	-66	-0.246	0
2635	11	7	7	LEA	LEA	1290	1278	1338	1338	57	-48	-1.053	0
2635	11	8	7	LEA	LEA	1289	1288	1330	1313	89	-41	-0.281	0
2635	11	9	7	LENTIL	LENTIL	1285	1264	1351	1343	75	-66	-1.053	0
2635	11	10	7	LENTIL	LENTIL	1320	1318	1348	1340	84	-28	-0.262	0
2635	11	11	7	Lotus	Lotus	924	978	1358	1338	135	-434	-2.667	0
2635	11	12	7	Lotus	Lotus	1012	1056	1354	1342	130	-342	-2.2	0
2635	11	1	8	LSL-N	LSL-N	1776	1774	1330	1340	183	446	2.372	0
2635	11	2	8	LSL-N	LSL-N	1687	1788	1295	1311	123	392	3.878	0
2635	11	3	8	MAA; MAL	MAA; MAL	4109	3727	1273	1252	109	2836	22.706	0
2635	11	4	8	MAA; MAL	MAA; MAL	4441	3953	1262	1263	50	3179	53.8	0
2635	11	5	8	MALECTIN	MALECTIN	1109	1109	1274	1255	91	-165	-1.604	0
2635	11	6	8	MALECTIN	MALECTIN	1077	1103	1319	1312	69	-242	-3.029	0
2635	11	7	8	MOA	MOA	712	790	1387	1388	51	-675	-11.725	0
2635	11	8	8	MOA	MOA	707	813	1380	1364	88	-673	-6.261	0
2635	11	9	8	MPL; MPA	MPL; MPA	1597	1584	1405	1401	62	192	2.952	0
2635	11	10	8	MPL; MPA	MPL; MPA	1615	1603	1436	1431	75	179	2.293	0
2635	11	11	8	NPA	NPA	5896	5619	1505	1495	76	4391	54.263	0
2635	11	12	8	NPA	NPA	6150	5721	1452	1439	85	4698	50.376	0
2635	11	1	9	ORYSATA	ORYSATA	1191	1647	1332	1320	81	-141	4.037	0
2635	11	2	9	ORYSATA	ORYSATA	1267	1709	1305	1295	74	-38	5.595	0
2635	11	3	9	PA-IIL	PA-IIL	772	785	1281	1268	86	-509	-5.616	0
2635	11	4	9	PA-IIL	PA-IIL	581	742	1322	1317	98	-741	-5.867	0
2635	11	5	9	PA-IL	PA-IL	865	819	1309	1291	85	-444	-5.553	0
2635	11	6	9	PA-IL	PA-IL	877	855	1368	1364	58	-491	-8.776	0
2635	11	7	9	PALa	PALa	698	1218	1393	1395	48	-695	-3.687	0
2635	11	8	9	PALa	PALa	821	1119	1410	1394	107	-589	-2.57	0
2635	11	9	9	PHA-E	PHA-E	6189	5818	1453	1448	68	4736	64.265	0
2635	11	10	9	PHA-E	PHA-E	6851	6432	1437	1434	68	5414	73.5	0
2635	11	11	9	PHA-L	PHA-L	1268	1286	1535	1529	78	-267	-3.115	0
2635	11	12	9	PHA-L	PHA-L	1960	2004	1472	1461	89	488	6.101	0
2635	11	1	10	PHA-P	PHA-P	1150	1160	1349	1332	88	-199	-1.955	0
2635	11	2	10	PHA-P	PHA-P	1183	1164	1335	1329	70	-152	-2.357	0
2635	11	3	10	PNA	PNA	866	870	1283	1267	97	-417	-4.093	0
2635	11	4	10	PNA	PNA	898	899	1360	1362	48	-462	-9.646	0
2635	11	5	10	PPL	PPL	1111	1098	1334	1315	118	-223	-1.839	0
2635	11	6	10	PPL	PPL	1081	1094	1378	1371	66	-297	-4.197	0
2635	11	7	10	PSA/PEA	PSA/PEA	1453	1487	1397	1392	72	56	1.319	0
2635	11	8	10	PSA/PEA	PSA/PEA	1340	1341	1409	1392	97	-69	-0.526	0
2635	11	9	10	PSL1A	PSL1A	3695	4376	1451	1448	83	2244	35.277	0
2635	11	10	10	PSL1A	PSL1A	4252	5102	1470	1463	68	2782	53.515	0
2635	11	11	10	PTL	PTL	1481	1465	1503	1497	67	-22	-0.478	0
2635	11	12	10	PTL	PTL	1543	1518	1498	1489	73	45	0.397	0
2635	11	1	11	RS-FUC	RS-FUC	1037	917	1357	1360	132	-320	-3.356	0
2635	11	2	11	RS-FUC	RS-FUC	950	864	1336	1331	68	-386	-6.868	0
2635	11	3	11	SAMB	SAMB	16508	17004	1294	1299	169	15214	92.929	0
2635	11	4	11	SAMB	SAMB	16730	16688	1342	1357	134	15388	114.41	0
2635	11	5	11	SBA	SBA	676	790	1339	1324	99	-663	-5.394	0
2635	11	6	11	SBA	SBA	737	808	1356	1363	433	-619	-1.282	0
2635	11	7	11	SJA	SJA	1107	1109	1414	1395	136	-307	-2.103	0
2635	11	8	11	SJA	SJA	1246	1166	1400	1394	847	-154	-0.269	0
2635	11	9	11	SNA-I	SNA-I	3750	3636	1448	1446	60	2302	36.5	0
2635	11	10	11	SNA-I	SNA-I	5514	5158	1471	1465	82	4043	45.037	0
2635	11	11	11	SNA-II	SNA-II	1329	1315	1493	1480	88	-164	-1.875	0
2635	11	12	11	SNA-II	SNA-II	1254	1283	1487	1469	106	-233	-1.755	0
2635	11	1	12	STL	STL	2524	2538	1359	1357	76	1165	15.539	0
2635	11	2	12	STL	STL	1957	1887	1322	1320	80	635	7.088	0
2635	11	3	12	UDA	UDA	1060	1062	1280	1265	91	-220	-2.231	0
2635	11	4	12	UDA	UDA	937	893	1255	1250	90	-318	-3.967	0
2635	11	5	12	UEA I	UEA I	1234	1279	1256	1227	132	-22	0.394	0
2635	11	6	12	UEA I	UEA I	1222	1274	1310	1286	110	-88	-0.109	0
2635	11	7	12	UEA-II	UEA-II	1331	1326	1405	1406	53	-74	-1.509	0
2635	11	8	12	UEA-II	UEA-II	1384	1355	1407	1402	359	-23	-0.131	0
2635	11	9	12	VFA	VFA	1433	1487	1449	1451	82	-16	0.439	0
2635	11	10	12	VFA	VFA	1396	1404	1472	1468	82	-76	-0.78	0
2635	11	11	12	VVA	VVA	8412	7340	1512	1529	314	6900	18.506	0
2635	11	12	12	VVA	VVA	7532	6673	1482	1472	89	6050	58.438	0
2635	11	1	13	WFA	WFA	772	838	1357	1350	65	-585	-7.877	0
2635	11	2	13	WFA	WFA	743	794	1321	1320	77	-578	-6.831	0
2635	11	3	13	WGA	WGA	1319	1315	1274	1260	92	45	0.598	0
2635	11	4	13	WGA	WGA	1424	1407	1349	1346	69	75	0.884	0
2635	11	5	13	NEG	NEG	225	420	1374	1359	98	-1149	-9.582	0
2635	11	6	13	NEG	NEG	151	376	1354	1340	90	-1203	-10.711	0
2635	11	7	13	NEG	NEG	312	407	1410	1415	95	-1098	-10.611	0
2635	11	8	13	NEG	NEG	308	430	1416	1403	83	-1108	-11.723	0
2635	11	9	13	POS2	POS2	6501	7177	1456	1477	496	5045	11.492	0
2635	11	10	13	POS2	POS2	8111	7377	1482	1476	84	6629	70.25	0
2635	11	11	13	POS1	POS1	20798	18832	1519	1519	60	19279	288.55	0
2635	11	12	13	POS1	POS1	22535	19162	1466	1442	110	21069	161.091	0
3119	12	1	1	POS1	POS1	16450	12896	1141	1139	44	15309	267.205	0
3119	12	2	1	POS1	POS1	18846	15444	1130	1115	84	17716	170.583	0
3119	12	3	1	POS2	POS2	2270	3059	1128	1130	64	1142	30.141	0
3119	12	4	1	POS2	POS2	2314	3225	1080	1077	65	1234	33.046	0
3119	12	5	1	NEG	NEG	108	387	1001	999	50	-893	-12.24	0
3119	12	6	1	NEG	NEG	167	568	1096	1095	57	-929	-9.246	0
3119	12	7	1	NEG	NEG	147	447	1134	1111	118	-987	-5.627	0
3119	12	8	1	NEG	NEG	164	500	1213	1188	113	-1049	-6.088	0
3119	12	9	1	AAA	AAA	780	816	1285	1288	61	-505	-7.738	0
3119	12	10	1	AAA	AAA	908	935	1325	1335	90	-417	-4.444	0
3119	12	11	1	AAL	AAL	1438	1439	1330	1302	148	108	0.926	0
3119	12	12	1	AAL	AAL	1321	1346	1221	1156	181	100	1.05	0
3119	12	1	2	ACG	ACG	1659	1610	1110	1115	66	549	7.5	0
3119	12	2	2	ACG	ACG	1625	1565	1119	1110	102	506	4.461	0
3119	12	3	2	ACL	ACL	842	838	1119	1114	71	-277	-3.887	0
3119	12	4	2	ACL	ACL	911	891	1098	1092	78	-187	-2.577	0
3119	12	5	2	ASA	ASA	5332	5411	1027	1028	71	4305	61.732	0
3119	12	6	2	ASA	ASA	6969	6615	1107	1111	52	5862	105.846	0
3119	12	7	2	BANLEC	BANLEC	5943	5322	1172	1151	173	4771	24.11	0
3119	12	8	2	BANLEC	BANLEC	5240	4897	1236	1206	137	4004	26.942	0
3119	12	9	2	BC2L-A	BC2L-A	1297	1414	1285	1291	83	12	1.482	0
3119	12	10	2	BC2L-A	BC2L-A	1327	1406	1334	1341	80	-7	0.813	0
3119	12	11	2	BC2LCN	BC2LCN	883	885	1341	1313	153	-458	-2.797	0
3119	12	12	2	BC2LCN	BC2LCN	835	837	1201	1076	262	-366	-0.912	0
3119	12	1	3	BPA; BPL	BPA; BPL	848	861	1076	1078	56	-228	-3.875	0
3119	12	2	3	BPA; BPL	BPA; BPL	931	932	1082	1068	85	-151	-1.6	0
3119	12	3	3	CALSEPA	CALSEPA	5208	7909	1101	1072	113	4107	60.504	0
3119	12	4	3	CALSEPA	CALSEPA	5734	8497	1081	1083	93	4653	79.72	0
3119	12	5	3	CGL2	CGL2	1097	2206	1010	1016	75	87	15.867	0
3119	12	6	3	CGL2	CGL2	1185	2036	1053	1058	69	132	14.174	0
3119	12	7	3	CNL	CNL	675	715	1135	1117	149	-460	-2.698	0
3119	12	8	3	CNL	CNL	894	863	1216	1189	155	-322	-2.103	0
3119	12	9	3	Con A	Con A	1352	1367	1291	1295	81	61	0.889	0
3119	12	10	3	Con A	Con A	1356	1366	1311	1313	50	45	1.06	0
3119	12	11	3	DBA	DBA	996	1060	1347	1328	154	-351	-1.74	0
3119	12	12	3	DBA	DBA	935	960	1188	1092	226	-253	-0.584	0
3119	12	1	4	DISCOIDIN I	DISCOIDIN I	358	445	1096	1147	1051	-738	-0.668	0
3119	12	2	4	DISCOIDIN I	DISCOIDIN I	363	468	1081	1073	92	-718	-6.576	0
3119	12	3	4	DISCOIDIN II	DISCOIDIN II	727	732	1102	1135	121	-375	-3.331	0
3119	12	4	4	DISCOIDIN II	DISCOIDIN II	710	688	1047	1046	74	-337	-4.838	0
3119	12	5	4	DSA	DSA	2753	2485	966	974	77	1787	19.623	0
3119	12	6	4	DSA	DSA	2787	2528	1016	1032	284	1771	5.268	0
3119	12	7	4	ECA	ECA	627	649	1108	1097	131	-481	-3.42	0
3119	12	8	4	ECA	ECA	639	638	1186	1176	140	-547	-3.843	0
3119	12	9	4	EEL	EEL	1258	1278	1261	1276	117	-3	0.017	0
3119	12	10	4	EEL	EEL	1209	1221	1286	1285	60	-77	-1.067	0
3119	12	11	4	F17AG	F17AG	934	960	1297	1259	152	-363	-1.967	0
3119	12	12	4	F17AG	F17AG	809	817	1107	1015	221	-298	-0.896	0
3119	12	1	5	GAL1	GAL1	178	392	1082	1116	119	-904	-6.084	0
3119	12	2	5	GAL1	GAL1	147	372	1075	1095	134	-928	-5.396	0
3119	12	3	5	GAL1-S	GAL1-S	243	363	1061	1092	121	-818	-6.025	0
3119	12	4	5	GAL1-S	GAL1-S	230	359	975	982	97	-745	-6.423	0
3119	12	5	5	GAL2	GAL2	578	558	915	921	67	-337	-5.418	0
3119	12	6	5	GAL2	GAL2	673	680	1003	1012	94	-330	-3.532	0
3119	12	7	5	GAL3	GAL3	193	360	1103	1079	138	-910	-5.21	0
3119	12	8	5	GAL3	GAL3	125	264	1172	1145	113	-1047	-7.796	0
3119	12	9	5	GAL3C-S	GAL3C-S	1281	1335	1213	1220	90	68	1.278	0
3119	12	10	5	GAL3C-S	GAL3C-S	1325	1327	1236	1240	49	89	1.776	0
3119	12	11	5	GAL7-S	GAL7-S	553	662	1246	1212	147	-693	-3.741	0
3119	12	12	5	GAL7-S	GAL7-S	499	507	1040	959	228	-541	-1.982	0
3119	12	1	6	GAL9	GAL9	329	466	1055	1075	102	-726	-5.971	0
3119	12	2	6	GAL9	GAL9	273	374	1011	1025	125	-738	-5.208	0
3119	12	3	6	GNA	GNA	17858	18372	981	1007	146	16877	118.938	0
3119	12	4	6	GNA	GNA	17006	17638	855	859	126	16151	133.167	0
3119	12	5	6	GRFT	GRFT	1098	5470	852	860	101	246	45.644	0
3119	12	6	6	GRFT	GRFT	4723	6781	1015	1034	96	3708	59.865	0
3119	12	7	6	GS-I;?GSL-I	GS-I;?GSL-I	1239	1226	1051	1028	132	188	1.5	0
3119	12	8	6	GS-I;?GSL-I	GS-I;?GSL-I	1291	1265	1130	1107	127	161	1.244	0
3119	12	9	6	GS-II; GSL-II	GS-II; GSL-II	529	588	1181	1184	91	-652	-6.549	0
3119	12	10	6	GS-II; GSL-II	GS-II; GSL-II	566	630	1196	1202	57	-630	-10.035	0
3119	12	11	6	HHA; HHL	HHA; HHL	10902	9332	1164	1139	129	9738	63.512	0
3119	12	12	6	HHA; HHL	HHA; HHL	10513	8979	928	901	168	9585	48.083	0
3119	12	1	7	Jacalin	Jacalin	1005	1019	1010	1045	575	-5	-0.045	0
3119	12	2	7	Jacalin	Jacalin	887	891	987	1002	118	-100	-0.941	0
3119	12	3	7	LBA	LBA	648	696	938	940	121	-290	-2.017	0
3119	12	4	7	LBA	LBA	767	786	786	789	121	-19	-0.025	0
3119	12	5	7	LcH A	LcH A	957	957	858	871	132	99	0.652	0
3119	12	6	7	LcH A	LcH A	970	997	947	963	99	23	0.343	0
3119	12	7	7	LEA	LEA	1060	1092	1001	983	131	59	0.832	0
3119	12	8	7	LEA	LEA	1079	1107	1071	1051	123	8	0.455	0
3119	12	9	7	LENTIL	LENTIL	1153	1190	1109	1110	66	44	1.212	0
3119	12	10	7	LENTIL	LENTIL	1089	1122	1112	1111	54	-23	0.204	0
3119	12	11	7	Lotus	Lotus	723	736	1089	1073	161	-366	-2.093	0
3119	12	12	7	Lotus	Lotus	568	580	878	849	182	-310	-1.478	0
3119	12	1	8	LSL-N	LSL-N	1444	1370	1099	1115	108	345	2.361	0
3119	12	2	8	LSL-N	LSL-N	1216	1277	1076	1085	150	140	1.28	0
3119	12	3	8	MAA; MAL	MAA; MAL	4605	3922	1015	1037	111	3590	25.991	0
3119	12	4	8	MAA; MAL	MAA; MAL	4269	3734	957	979	116	3312	23.75	0
3119	12	5	8	MALECTIN	MALECTIN	930	919	1009	1026	105	-79	-1.019	0
3119	12	6	8	MALECTIN	MALECTIN	1013	992	1033	1045	90	-20	-0.589	0
3119	12	7	8	MOA	MOA	546	712	1062	1035	127	-516	-2.543	0
3119	12	8	8	MOA	MOA	647	765	1130	1109	101	-483	-3.406	0
3119	12	9	8	MPL; MPA	MPL; MPA	1379	1360	1158	1160	80	221	2.5	0
3119	12	10	8	MPL; MPA	MPL; MPA	1476	1415	1206	1209	52	270	3.962	0
3119	12	11	8	NPA	NPA	6097	5650	1217	1183	139	4880	32.137	0
3119	12	12	8	NPA	NPA	6780	5905	1041	942	254	5739	19.539	0
3119	12	1	9	ORYSATA	ORYSATA	1271	1371	1197	1220	107	74	1.411	0
3119	12	2	9	ORYSATA	ORYSATA	1176	1176	1153	1167	143	23	0.063	0
3119	12	3	9	PA-IIL	PA-IIL	618	824	1068	1084	123	-450	-2.114	0
3119	12	4	9	PA-IIL	PA-IIL	708	847	1024	1041	109	-316	-1.78	0
3119	12	5	9	PA-IL	PA-IL	793	731	1039	1045	86	-246	-3.651	0
3119	12	6	9	PA-IL	PA-IL	851	774	1059	1063	94	-208	-3.074	0
3119	12	7	9	PALa	PALa	627	1138	1001	982	142	-374	1.099	0
3119	12	8	9	PALa	PALa	548	878	1176	1187	1002	-628	-0.308	0
3119	12	9	9	PHA-E	PHA-E	3000	2897	1210	1217	88	1790	19.091	0
3119	12	10	9	PHA-E	PHA-E	3343	3390	1214	1193	160	2129	13.731	0
3119	12	11	9	PHA-L	PHA-L	1199	1212	1221	1192	140	-22	0.143	0
3119	12	12	9	PHA-L	PHA-L	1236	1283	1124	1011	256	112	1.063	0
3119	12	1	10	PHA-P	PHA-P	1054	1067	1219	1236	125	-165	-1.352	0
3119	12	2	10	PHA-P	PHA-P	1055	1084	1131	1150	149	-76	-0.443	0
3119	12	3	10	PNA	PNA	721	807	1086	1102	139	-365	-2.122	0
3119	12	4	10	PNA	PNA	874	899	1032	1047	103	-158	-1.437	0
3119	12	5	10	PPL	PPL	954	941	1064	1071	98	-110	-1.327	0
3119	12	6	10	PPL	PPL	1003	1001	1110	1114	103	-107	-1.097	0
3119	12	7	10	PSA/PEA	PSA/PEA	1241	1276	1130	1104	131	111	1.313	0
3119	12	8	10	PSA/PEA	PSA/PEA	1216	1224	1183	1163	126	33	0.484	0
3119	12	9	10	PSL1A	PSL1A	4188	5873	1241	1247	81	2947	57.111	0
3119	12	10	10	PSL1A	PSL1A	4448	5332	1261	1264	52	3187	78.231	0
3119	12	11	10	PTL	PTL	1341	1352	1264	1236	133	77	0.872	0
3119	12	12	10	PTL	PTL	1185	1185	1110	1016	251	75	0.673	0
3119	12	1	11	RS-FUC	RS-FUC	1009	909	1284	1296	149	-275	-2.597	0
3119	12	2	11	RS-FUC	RS-FUC	951	820	1200	1210	160	-249	-2.437	0
3119	12	3	11	SAMB	SAMB	27491	25816	1069	1115	175	26422	141.149	0
3119	12	4	11	SAMB	SAMB	22073	20625	1037	1059	111	21036	176.27	0
3119	12	5	11	SBA	SBA	532	657	1083	1086	82	-551	-5.232	0
3119	12	6	11	SBA	SBA	525	645	1131	1146	95	-606	-5.274	0
3119	12	7	11	SJA	SJA	762	737	1171	1161	141	-409	-3.007	0
3119	12	8	11	SJA	SJA	863	922	1172	1154	140	-309	-1.657	0
3119	12	9	11	SNA-I	SNA-I	3757	3661	1191	1181	81	2566	30.617	0
3119	12	10	11	SNA-I	SNA-I	6135	5663	1267	1268	43	4868	102.209	0
3119	12	11	11	SNA-II	SNA-II	971	1021	1271	1264	547	-300	-0.444	0
3119	12	12	11	SNA-II	SNA-II	1069	1078	1180	1094	208	-111	-0.077	0
3119	12	1	12	STL	STL	2536	2451	1280	1297	108	1256	10.685	0
3119	12	2	12	STL	STL	2323	2281	1170	1184	141	1153	7.78	0
3119	12	3	12	UDA	UDA	755	772	1049	1057	106	-294	-2.689	0
3119	12	4	12	UDA	UDA	766	778	1042	1048	91	-276	-2.967	0
3119	12	5	12	UEA I	UEA I	1139	1146	1086	1094	86	53	0.605	0
3119	12	6	12	UEA I	UEA I	1136	1138	1139	1158	110	-3	-0.182	0
3119	12	7	12	UEA-II	UEA-II	1160	1142	1166	1146	134	-6	-0.03	0
3119	12	8	12	UEA-II	UEA-II	1080	2042	1182	1159	115	-102	7.678	0
3119	12	9	12	VFA	VFA	1266	1343	1245	1291	1010	21	0.051	0
3119	12	10	12	VFA	VFA	1240	1220	1278	1282	104	-38	-0.596	0
3119	12	11	12	VVA	VVA	8915	8355	1280	1243	151	7635	47.099	0
3119	12	12	12	VVA	VVA	8311	7592	1181	1055	274	7130	23.858	0
3119	12	1	13	WFA	WFA	551	710	1256	1275	128	-705	-4.414	0
3119	12	2	13	WFA	WFA	532	708	1150	1151	134	-618	-3.306	0
3119	12	3	13	WGA	WGA	1040	1021	1057	1053	106	-17	-0.302	0
3119	12	4	13	WGA	WGA	1050	1034	1002	1004	82	48	0.366	0
3119	12	5	13	NEG	NEG	133	384	1076	1077	82	-943	-8.451	0
3119	12	6	13	NEG	NEG	170	378	1123	1134	71	-953	-10.648	0
3119	12	7	13	NEG	NEG	271	335	1150	1130	132	-879	-6.023	0
3119	12	8	13	NEG	NEG	266	343	1187	1159	115	-921	-7.096	0
3119	12	9	13	POS2	POS2	7525	7556	1231	1231	66	6294	95.833	0
3119	12	10	13	POS2	POS2	8243	7245	1256	1242	79	6987	75.987	0
3119	12	11	13	POS1	POS1	20054	19277	1300	1271	140	18754	128.614	0
3119	12	12	13	POS1	POS1	21825	20120	1189	1095	232	20636	82.004	0
2637	13	1	1	POS1	POS1	15644	11781	942	939	46	14702	235.696	0
2637	13	2	1	POS1	POS1	18390	13466	935	933	67	17455	187.06	0
2637	13	3	1	POS2	POS2	2302	2797	928	917	65	1374	28.923	0
2637	13	4	1	POS2	POS2	2267	3144	909	909	43	1358	51.977	0
2637	13	5	1	NEG	NEG	121	377	845	833	69	-724	-6.609	0
2637	13	6	1	NEG	NEG	128	399	874	871	55	-746	-8.582	0
2637	13	7	1	NEG	NEG	133	368	955	955	43	-822	-13.651	0
2637	13	8	1	NEG	NEG	168	479	974	968	60	-806	-8.15	0
2637	13	9	1	AAA	AAA	755	779	1001	998	50	-246	-4.38	0
2637	13	10	1	AAA	AAA	707	712	1003	1006	64	-296	-4.594	0
2637	13	11	1	AAL	AAL	1000	987	1000	1002	63	0	-0.238	0
2637	13	12	1	AAL	AAL	1025	1020	967	962	71	58	0.817	0
2637	13	1	2	ACG	ACG	1442	1353	941	938	47	501	8.83	0
2637	13	2	2	ACG	ACG	1442	1301	919	915	47	523	8.213	0
2637	13	3	2	ACL	ACL	582	608	914	900	83	-332	-3.518	0
2637	13	4	2	ACL	ACL	540	598	914	910	61	-374	-5.115	0
2637	13	5	2	ASA	ASA	5015	5237	849	814	109	4166	40.578	0
2637	13	6	2	ASA	ASA	6506	6255	891	885	57	5615	94.211	0
2637	13	7	2	BANLEC	BANLEC	6223	5590	946	948	62	5277	74.871	0
2637	13	8	2	BANLEC	BANLEC	6434	5917	957	950	67	5477	74.134	0
2637	13	9	2	BC2L-A	BC2L-A	1147	1346	1000	1011	99	147	3.384	0
2637	13	10	2	BC2L-A	BC2L-A	1264	1312	1003	1003	55	261	5.618	0
2637	13	11	2	BC2LCN	BC2LCN	796	820	972	967	60	-176	-2.45	0
2637	13	12	2	BC2LCN	BC2LCN	826	842	922	931	253	-96	-0.352	0
2637	13	1	3	BPA; BPL	BPA; BPL	686	703	928	947	510	-242	-0.478	0
2637	13	2	3	BPA; BPL	BPA; BPL	782	796	906	903	49	-124	-2.184	0
2637	13	3	3	CALSEPA	CALSEPA	3715	5506	891	886	150	2824	30.8	0
2637	13	4	3	CALSEPA	CALSEPA	4595	6482	900	907	201	3695	27.736	0
2637	13	5	3	CGL2	CGL2	845	1155	826	791	110	19	3.309	0
2637	13	6	3	CGL2	CGL2	884	1362	875	871	51	9	9.627	0
2637	13	7	3	CNL	CNL	568	600	941	940	39	-373	-8.718	0
2637	13	8	3	CNL	CNL	906	754	951	947	91	-45	-2.121	0
2637	13	9	3	Con A	Con A	1489	1437	991	994	58	498	7.638	0
2637	13	10	3	Con A	Con A	1572	1530	996	997	56	576	9.518	0
2637	13	11	3	DBA	DBA	922	927	956	944	84	-34	-0.202	0
2637	13	12	3	DBA	DBA	808	803	859	842	107	-51	-0.364	0
2637	13	1	4	DISCOIDIN I	DISCOIDIN I	263	380	917	916	46	-654	-11.652	0
2637	13	2	4	DISCOIDIN I	DISCOIDIN I	336	388	895	894	45	-559	-11.244	0
2637	13	3	4	DISCOIDIN II	DISCOIDIN II	560	569	877	869	66	-317	-4.545	0
2637	13	4	4	DISCOIDIN II	DISCOIDIN II	536	555	863	863	41	-327	-7.512	0
2637	13	5	4	DSA	DSA	2413	2192	809	798	73	1604	19.096	0
2637	13	6	4	DSA	DSA	2375	2192	869	867	53	1506	25	0
2637	13	7	4	ECA	ECA	621	629	913	913	40	-292	-7.1	0
2637	13	8	4	ECA	ECA	613	625	938	934	78	-325	-3.962	0
2637	13	9	4	EEL	EEL	727	743	992	992	59	-265	-4.22	0
2637	13	10	4	EEL	EEL	740	760	988	990	56	-248	-4.107	0
2637	13	11	4	F17AG	F17AG	797	813	991	998	89	-194	-2.079	0
2637	13	12	4	F17AG	F17AG	762	776	903	903	242	-141	-0.525	0
2637	13	1	5	GAL1	GAL1	173	355	890	887	50	-717	-10.64	0
2637	13	2	5	GAL1	GAL1	144	339	856	854	45	-712	-11.444	0
2637	13	3	5	GAL1-S	GAL1-S	207	248	831	822	65	-624	-8.831	0
2637	13	4	5	GAL1-S	GAL1-S	192	277	799	782	87	-607	-5.805	0
2637	13	5	5	GAL2	GAL2	482	463	765	735	95	-283	-2.863	0
2637	13	6	5	GAL2	GAL2	538	540	864	860	51	-326	-6.275	0
2637	13	7	5	GAL3	GAL3	124	238	907	902	57	-783	-11.649	0
2637	13	8	5	GAL3	GAL3	131	217	937	930	67	-806	-10.642	0
2637	13	9	5	GAL3C-S	GAL3C-S	1033	1089	968	967	47	65	2.596	0
2637	13	10	5	GAL3C-S	GAL3C-S	1034	1054	973	971	53	61	1.566	0
2637	13	11	5	GAL7-S	GAL7-S	659	667	976	974	44	-317	-6.977	0
2637	13	12	5	GAL7-S	GAL7-S	469	500	899	886	75	-430	-5.147	0
2637	13	1	6	GAL9	GAL9	234	344	817	814	55	-583	-8.545	0
2637	13	2	6	GAL9	GAL9	233	288	790	791	47	-557	-10.702	0
2637	13	3	6	GNA	GNA	19032	18381	745	738	75	18287	235.24	0
2637	13	4	6	GNA	GNA	19399	19074	701	704	46	18698	399.348	0
2637	13	5	6	GRFT	GRFT	838	5256	737	733	56	101	80.768	0
2637	13	6	6	GRFT	GRFT	1912	6401	859	858	57	1053	97.246	0
2637	13	7	6	GS-I;?GSL-I	GS-I;?GSL-I	846	863	900	902	96	-54	-0.406	0
2637	13	8	6	GS-I;?GSL-I	GS-I;?GSL-I	895	892	911	901	71	-16	-0.127	0
2637	13	9	6	GS-II; GSL-II	GS-II; GSL-II	530	584	951	952	46	-421	-8	0
2637	13	10	6	GS-II; GSL-II	GS-II; GSL-II	530	583	949	951	65	-419	-5.662	0
2637	13	11	6	HHA; HHL	HHA; HHL	12412	10615	946	947	73	11466	132.438	0
2637	13	12	6	HHA; HHL	HHA; HHL	12311	10242	826	830	96	11485	98.042	0
2637	13	1	7	Jacalin	Jacalin	789	781	858	860	74	-69	-1.068	0
2637	13	2	7	Jacalin	Jacalin	836	843	829	829	51	7	0.275	0
2637	13	3	7	LBA	LBA	594	607	752	744	73	-158	-1.877	0
2637	13	4	7	LBA	LBA	750	783	718	722	55	32	1.109	0
2637	13	5	7	LcH A	LcH A	831	916	761	763	61	70	2.508	0
2637	13	6	7	LcH A	LcH A	887	947	827	830	58	60	2.017	0
2637	13	7	7	LEA	LEA	881	876	890	892	53	-9	-0.302	0
2637	13	8	7	LEA	LEA	917	911	898	891	67	19	0.299	0
2637	13	9	7	LENTIL	LENTIL	936	1010	890	891	80	46	1.488	0
2637	13	10	7	LENTIL	LENTIL	1061	1121	882	883	51	179	4.667	0
2637	13	11	7	Lotus	Lotus	620	636	884	886	62	-264	-4.032	0
2637	13	12	7	Lotus	Lotus	603	616	847	840	86	-244	-2.605	0
2637	13	1	8	LSL-N	LSL-N	1102	1098	895	896	58	207	3.483	0
2637	13	2	8	LSL-N	LSL-N	1065	1078	860	864	72	205	2.972	0
2637	13	3	8	MAA; MAL	MAA; MAL	3138	2821	799	792	63	2339	32.206	0
2637	13	4	8	MAA; MAL	MAA; MAL	3321	2950	821	823	52	2500	40.904	0
2637	13	5	8	MALECTIN	MALECTIN	769	775	864	860	59	-95	-1.441	0
2637	13	6	8	MALECTIN	MALECTIN	766	777	898	893	51	-132	-2.275	0
2637	13	7	8	MOA	MOA	550	632	936	935	57	-386	-5.316	0
2637	13	8	8	MOA	MOA	534	638	933	931	80	-399	-3.662	0
2637	13	9	8	MPL; MPA	MPL; MPA	1104	1133	931	934	55	173	3.618	0
2637	13	10	8	MPL; MPA	MPL; MPA	1133	1123	947	944	52	186	3.442	0
2637	13	11	8	NPA	NPA	6224	6041	993	988	55	5231	91.873	0
2637	13	12	8	NPA	NPA	7186	6632	930	927	75	6256	76.067	0
2637	13	1	9	ORYSATA	ORYSATA	944	1623	934	940	80	10	8.538	0
2637	13	2	9	ORYSATA	ORYSATA	967	1725	885	890	68	82	12.279	0
2637	13	3	9	PA-IIL	PA-IIL	576	563	824	821	66	-248	-3.909	0
2637	13	4	9	PA-IIL	PA-IIL	443	548	878	882	53	-435	-6.302	0
2637	13	5	9	PA-IL	PA-IL	529	510	891	887	56	-362	-6.732	0
2637	13	6	9	PA-IL	PA-IL	550	532	947	944	64	-397	-6.437	0
2637	13	7	9	PALa	PALa	748	954	969	975	54	-221	-0.389	0
2637	13	8	9	PALa	PALa	694	900	971	972	83	-277	-0.867	0
2637	13	9	9	PHA-E	PHA-E	4327	4089	971	973	59	3356	52.814	0
2637	13	10	9	PHA-E	PHA-E	4674	4456	971	968	52	3703	67.077	0
2637	13	11	9	PHA-L	PHA-L	1260	1325	1021	1026	82	239	3.646	0
2637	13	12	9	PHA-L	PHA-L	1418	1464	959	953	86	459	5.942	0
2637	13	1	10	PHA-P	PHA-P	703	736	945	950	83	-242	-2.578	0
2637	13	2	10	PHA-P	PHA-P	708	750	899	902	75	-191	-2.027	0
2637	13	3	10	PNA	PNA	637	678	846	840	78	-209	-2.077	0
2637	13	4	10	PNA	PNA	662	711	905	903	63	-243	-3.048	0
2637	13	5	10	PPL	PPL	759	791	914	912	72	-155	-1.681	0
2637	13	6	10	PPL	PPL	736	747	947	946	59	-211	-3.373	0
2637	13	7	10	PSA/PEA	PSA/PEA	1336	1348	1000	1025	225	336	1.436	0
2637	13	8	10	PSA/PEA	PSA/PEA	1177	1249	973	967	76	204	3.711	0
2637	13	9	10	PSL1A	PSL1A	3253	3855	981	978	51	2272	56.412	0
2637	13	10	10	PSL1A	PSL1A	3498	4442	996	993	79	2502	43.658	0
2637	13	11	10	PTL	PTL	1019	1022	1008	1007	47	11	0.319	0
2637	13	12	10	PTL	PTL	1067	1098	957	951	61	110	2.41	0
2637	13	1	11	RS-FUC	RS-FUC	891	812	1052	1064	111	-161	-2.27	0
2637	13	2	11	RS-FUC	RS-FUC	916	874	930	949	100	-14	-0.75	0
2637	13	3	11	SAMB	SAMB	20725	20644	857	892	267	19868	73.978	0
2637	13	4	11	SAMB	SAMB	20899	20856	910	914	64	19989	311.594	0
2637	13	5	11	SBA	SBA	392	510	925	918	75	-533	-5.44	0
2637	13	6	11	SBA	SBA	491	574	959	967	92	-468	-4.272	0
2637	13	7	11	SJA	SJA	572	582	973	985	283	-401	-1.424	0
[truncated: 185 more rows]

## Sheet: lectin microarray 4
Sample Name	Block	Column	Row	Name	ID	F532 Median	F532 Mean	B532 Median	B532 Mean	B532 SD	F532 Median - B532	SNR 532	Flags
2639	1	1	1	POS1	POS1	17653	14899	50	50	6	17603	2474.83	0
2639	1	2	1	POS1	POS1	20758	17635	52	54	46	20706	382.196	0
2639	1	3	1	POS2	POS2	2947	3695	53	54	7	2894	520.143	0
2639	1	4	1	POS2	POS2	3126	4286	54	54	6	3072	705.333	0
2639	1	5	1	NEG	NEG	48	54	53	54	7	-5	0	0
2639	1	6	1	NEG	NEG	48	54	55	55	6	-7	-0.167	0
2639	1	7	1	NEG	NEG	48	53	53	53	9	-5	0	0
2639	1	8	1	NEG	NEG	48	53	54	54	6	-6	-0.167	0
2639	1	9	1	AAA	AAA	145	154	54	54	11	91	9.091	0
2639	1	10	1	AAA	AAA	153	165	55	55	7	98	15.714	0
2639	1	11	1	AAL	AAL	322	294	53	53	6	269	40.167	0
2639	1	12	1	AAL	AAL	312	286	52	52	6	260	39	0
2639	1	1	2	ACG	ACG	461	450	48	48	6	413	67	0
2639	1	2	2	ACG	ACG	487	446	49	49	6	438	66.167	0
2639	1	3	2	ACL	ACL	201	203	51	51	7	150	21.714	0
2639	1	4	2	ACL	ACL	186	192	52	52	6	134	23.333	0
2639	1	5	2	ASA	ASA	4503	4598	52	52	6	4451	757.667	0
2639	1	6	2	ASA	ASA	4756	5006	54	58	87	4702	56.874	0
2639	1	7	2	BANLEC	BANLEC	3990	3713	52	52	7	3938	523	0
2639	1	8	2	BANLEC	BANLEC	4299	4064	52	53	6	4247	668.5	0
2639	1	9	2	BC2L-A	BC2L-A	356	305	53	54	7	303	35.857	0
2639	1	10	2	BC2L-A	BC2L-A	355	308	51	53	12	304	21.25	0
2639	1	11	2	BC2LCN	BC2LCN	71	74	51	51	13	20	1.769	0
2639	1	12	2	BC2LCN	BC2LCN	73	77	51	51	7	22	3.714	0
2639	1	1	3	BPA; BPL	BPA; BPL	159	159	49	49	6	110	18.333	0
2639	1	2	3	BPA; BPL	BPA; BPL	159	161	50	50	6	109	18.5	0
2639	1	3	3	CALSEPA	CALSEPA	2475	2392	52	52	6	2423	390	0
2639	1	4	3	CALSEPA	CALSEPA	2436	2459	52	52	6	2384	401.167	0
2639	1	5	3	CGL2	CGL2	2267	2182	52	53	6	2215	354.833	0
2639	1	6	3	CGL2	CGL2	2426	2428	53	53	7	2373	339.286	0
2639	1	7	3	CNL	CNL	57	57	52	52	6	5	0.833	0
2639	1	8	3	CNL	CNL	58	59	52	52	6	6	1.167	0
2639	1	9	3	Con A	Con A	932	954	53	53	6	879	150.167	0
2639	1	10	3	Con A	Con A	1056	1015	52	52	6	1004	160.5	0
2639	1	11	3	DBA	DBA	742	668	51	51	6	691	102.833	0
2639	1	12	3	DBA	DBA	689	624	51	51	6	638	95.5	0
2639	1	1	4	DISCOIDIN I	DISCOIDIN I	47	194	46	47	5	1	29.4	0
2639	1	2	4	DISCOIDIN I	DISCOIDIN I	49	233	49	49	6	0	30.667	0
2639	1	3	4	DISCOIDIN II	DISCOIDIN II	113	109	51	51	6	62	9.667	0
2639	1	4	4	DISCOIDIN II	DISCOIDIN II	111	109	50	51	7	61	8.286	0
2639	1	5	4	DSA	DSA	1337	1387	50	50	6	1287	222.833	0
2639	1	6	4	DSA	DSA	1335	1214	49	50	6	1286	194	0
2639	1	7	4	ECA	ECA	130	130	52	52	6	78	13	0
2639	1	8	4	ECA	ECA	127	165	51	52	6	76	18.833	0
2639	1	9	4	EEL	EEL	258	242	52	52	6	206	31.667	0
2639	1	10	4	EEL	EEL	274	256	51	51	6	223	34.167	0
2639	1	11	4	F17AG	F17AG	97	97	51	81	721	46	0.022	0
2639	1	12	4	F17AG	F17AG	92	90	48	48	7	44	6	0
2639	1	1	5	GAL1	GAL1	129	133	48	48	7	81	12.143	0
2639	1	2	5	GAL1	GAL1	156	163	50	50	6	106	18.833	0
2639	1	3	5	GAL1-S	GAL1-S	51	51	50	51	6	1	0	0
2639	1	4	5	GAL1-S	GAL1-S	49	50	50	51	7	-1	-0.143	0
2639	1	5	5	GAL2	GAL2	80	87	52	53	16	28	2.125	0
2639	1	6	5	GAL2	GAL2	83	87	51	52	12	32	2.917	0
2639	1	7	5	GAL3	GAL3	596	543	51	52	6	545	81.833	0
2639	1	8	5	GAL3	GAL3	615	560	52	52	6	563	84.667	0
2639	1	9	5	GAL3C-S	GAL3C-S	169	170	51	52	6	118	19.667	0
2639	1	10	5	GAL3C-S	GAL3C-S	140	144	51	52	8	89	11.5	0
2639	1	11	5	GAL7-S	GAL7-S	54	56	52	52	7	2	0.571	0
2639	1	12	5	GAL7-S	GAL7-S	50	50	47	48	7	3	0.286	0
2639	1	1	6	GAL9	GAL9	401	401	47	47	6	354	59	0
2639	1	2	6	GAL9	GAL9	394	385	50	52	28	344	11.893	0
2639	1	3	6	GNA	GNA	12978	12986	52	53	9	12926	1437	0
2639	1	4	6	GNA	GNA	13324	13350	53	56	17	13271	782	0
2639	1	5	6	GRFT	GRFT	4445	4194	50	51	8	4395	517.875	0
2639	1	6	6	GRFT	GRFT	4430	4212	50	51	6	4380	693.5	0
2639	1	7	6	GS-I;?GSL-I	GS-I;?GSL-I	114	104	51	51	6	63	8.833	0
2639	1	8	6	GS-I;?GSL-I	GS-I;?GSL-I	120	111	51	51	6	69	10	0
2639	1	9	6	GS-II; GSL-II	GS-II; GSL-II	252	270	51	51	7	201	31.286	0
2639	1	10	6	GS-II; GSL-II	GS-II; GSL-II	253	290	51	53	21	202	11.286	0
2639	1	11	6	HHA; HHL	HHA; HHL	15359	13732	52	52	6	15307	2280	0
2639	1	12	6	HHA; HHL	HHA; HHL	15241	14059	46	47	6	15195	2335.33	0
2639	1	1	7	Jacalin	Jacalin	302	306	48	48	6	254	43	0
2639	1	2	7	Jacalin	Jacalin	296	281	49	49	6	247	38.667	0
2639	1	3	7	LBA	LBA	554	544	51	51	6	503	82.167	0
2639	1	4	7	LBA	LBA	836	814	51	51	6	785	127.167	0
2639	1	5	7	LcH A	LcH A	432	460	51	51	8	381	51.125	0
2639	1	6	7	LcH A	LcH A	435	439	51	51	6	384	64.667	0
2639	1	7	7	LEA	LEA	223	216	52	52	6	171	27.333	0
2639	1	8	7	LEA	LEA	217	206	52	52	6	165	25.667	0
2639	1	9	7	LENTIL	LENTIL	206	206	50	51	6	156	25.833	0
2639	1	10	7	LENTIL	LENTIL	211	211	51	51	7	160	22.857	0
2639	1	11	7	Lotus	Lotus	61	240	50	50	9	11	21.111	0
2639	1	12	7	Lotus	Lotus	65	234	46	47	29	19	6.448	0
2639	1	1	8	LSL-N	LSL-N	118	117	48	49	28	70	2.429	0
2639	1	2	8	LSL-N	LSL-N	116	109	49	49	6	67	10	0
2639	1	3	8	MAA; MAL	MAA; MAL	3050	2710	50	50	6	3000	443.333	0
2639	1	4	8	MAA; MAL	MAA; MAL	2921	2716	51	51	6	2870	444.167	0
2639	1	5	8	MALECTIN	MALECTIN	158	148	50	50	6	108	16.333	0
2639	1	6	8	MALECTIN	MALECTIN	161	156	50	50	6	111	17.667	0
2639	1	7	8	MOA	MOA	103	104	50	50	6	53	9	0
2639	1	8	8	MOA	MOA	108	105	49	50	6	59	9.167	0
2639	1	9	8	MPL; MPA	MPL; MPA	239	226	49	49	6	190	29.5	0
2639	1	10	8	MPL; MPA	MPL; MPA	251	236	50	50	6	201	31	0
2639	1	11	8	NPA	NPA	5047	5021	49	50	10	4998	497.1	0
2639	1	12	8	NPA	NPA	4385	4522	46	48	34	4339	131.588	0
2639	1	1	9	ORYSATA	ORYSATA	596	574	46	46	5	550	105.6	0
2639	1	2	9	ORYSATA	ORYSATA	761	696	47	48	5	714	129.6	0
2639	1	3	9	PA-IIL	PA-IIL	86	165	49	49	6	37	19.333	0
2639	1	4	9	PA-IIL	PA-IIL	114	174	50	50	6	64	20.667	0
2639	1	5	9	PA-IL	PA-IL	62	64	50	50	6	12	2.333	0
2639	1	6	9	PA-IL	PA-IL	60	81	50	50	6	10	5.167	0
2639	1	7	9	PALa	PALa	163	312	50	51	17	113	15.353	0
2639	1	8	9	PALa	PALa	155	351	49	49	6	106	50.333	0
2639	1	9	9	PHA-E	PHA-E	1421	1296	48	49	6	1373	207.833	0
2639	1	10	9	PHA-E	PHA-E	1493	1383	48	51	59	1445	22.576	0
2639	1	11	9	PHA-L	PHA-L	498	480	47	47	6	451	72.167	0
2639	1	12	9	PHA-L	PHA-L	535	511	45	47	61	490	7.607	0
2639	1	1	10	PHA-P	PHA-P	142	147	45	45	5	97	20.4	0
2639	1	2	10	PHA-P	PHA-P	145	147	46	46	6	99	16.833	0
2639	1	3	10	PNA	PNA	154	166	48	48	6	106	19.667	0
2639	1	4	10	PNA	PNA	163	169	50	50	6	113	19.833	0
2639	1	5	10	PPL	PPL	93	117	50	53	33	43	1.939	0
2639	1	6	10	PPL	PPL	99	113	49	49	6	50	10.667	0
2639	1	7	10	PSA/PEA	PSA/PEA	247	247	50	54	51	197	3.784	0
2639	1	8	10	PSA/PEA	PSA/PEA	241	248	50	50	6	191	33	0
2639	1	9	10	PSL1A	PSL1A	31569	33735	49	50	9	31520	3742.78	0
2639	1	10	10	PSL1A	PSL1A	30918	31856	46	46	7	30872	4544.29	0
2639	1	11	10	PTL	PTL	51	51	45	46	6	6	0.833	0
2639	1	12	10	PTL	PTL	56	55	45	45	6	11	1.667	0
2639	1	1	11	RS-FUC	RS-FUC	189	188	44	44	5	145	28.8	0
2639	1	2	11	RS-FUC	RS-FUC	194	196	45	45	5	149	30.2	0
2639	1	3	11	SAMB	SAMB	11866	11376	49	99	171	11817	65.947	0
2639	1	4	11	SAMB	SAMB	7901	7738	50	95	154	7851	49.63	0
2639	1	5	11	SBA	SBA	84	95	47	47	6	37	8	0
2639	1	6	11	SBA	SBA	109	180	48	48	6	61	22	0
2639	1	7	11	SJA	SJA	73	74	48	49	6	25	4.167	0
2639	1	8	11	SJA	SJA	63	63	47	47	11	16	1.455	0
2639	1	9	11	SNA-I	SNA-I	762	839	46	46	5	716	158.6	0
2639	1	10	11	SNA-I	SNA-I	809	857	45	45	5	764	162.4	0
2639	1	11	11	SNA-II	SNA-II	77	77	45	45	9	32	3.556	0
2639	1	12	11	SNA-II	SNA-II	78	84	46	46	6	32	6.333	0
2639	1	1	12	STL	STL	719	710	46	46	5	673	132.8	0
2639	1	2	12	STL	STL	737	720	47	48	6	690	112	0
2639	1	3	12	UDA	UDA	103	99	49	51	11	54	4.364	0
2639	1	4	12	UDA	UDA	100	99	46	49	12	54	4.167	0
2639	1	5	12	UEA I	UEA I	344	324	45	45	5	299	55.8	0
2639	1	6	12	UEA I	UEA I	336	317	45	45	6	291	45.333	0
2639	1	7	12	UEA-II	UEA-II	114	107	45	45	6	69	10.333	0
2639	1	8	12	UEA-II	UEA-II	110	106	45	46	11	65	5.455	0
2639	1	9	12	VFA	VFA	103	117	45	45	5	58	14.4	0
2639	1	10	12	VFA	VFA	98	151	44	45	6	54	17.667	0
2639	1	11	12	VVA	VVA	4949	4861	45	46	6	4904	802.5	0
2639	1	12	12	VVA	VVA	5142	5035	45	46	16	5097	311.813	0
2639	1	1	13	WFA	WFA	90	102	47	47	5	43	11	0
2639	1	2	13	WFA	WFA	93	98	46	46	5	47	10.4	0
2639	1	3	13	WGA	WGA	132	296	45	45	6	87	41.833	0
2639	1	4	13	WGA	WGA	148	306	44	45	5	104	52.2	0
2639	1	5	13	NEG	NEG	43	164	44	45	5	-1	23.8	0
2639	1	6	13	NEG	NEG	43	160	43	44	5	0	23.2	0
2639	1	7	13	NEG	NEG	43	154	44	44	5	-1	22	0
2639	1	8	13	NEG	NEG	44	188	45	45	5	-1	28.6	0
2639	1	9	13	POS2	POS2	3191	4919	45	45	5	3146	974.8	0
2639	1	10	13	POS2	POS2	3252	4967	44	45	13	3208	378.615	0
2639	1	11	13	POS1	POS1	17999	15905	45	77	333	17954	47.532	0
2639	1	12	13	POS1	POS1	20233	17704	47	68	91	20186	193.802	0
2647	3	1	1	POS1	POS1	17462	15687	50	51	7	17412	2233.71	0
2647	3	2	1	POS1	POS1	20318	18954	50	51	7	20268	2700.43	0
2647	3	3	1	POS2	POS2	2816	3804	52	53	7	2764	535.857	0
2647	3	4	1	POS2	POS2	3018	4356	51	52	7	2967	614.857	0
2647	3	5	1	NEG	NEG	44	49	49	50	15	-5	-0.067	0
2647	3	6	1	NEG	NEG	45	50	52	53	15	-7	-0.2	0
2647	3	7	1	NEG	NEG	47	52	52	52	6	-5	0	0
2647	3	8	1	NEG	NEG	46	50	52	52	6	-6	-0.333	0
2647	3	9	1	AAA	AAA	140	151	51	51	8	89	12.5	0
2647	3	10	1	AAA	AAA	128	132	51	51	6	77	13.5	0
2647	3	11	1	AAL	AAL	369	347	51	51	6	318	49.333	0
2647	3	12	1	AAL	AAL	366	343	52	52	7	314	41.571	0
2647	3	1	2	ACG	ACG	678	629	48	49	8	630	72.5	0
2647	3	2	2	ACG	ACG	646	627	49	49	5	597	115.6	0
2647	3	3	2	ACL	ACL	204	211	49	50	6	155	26.833	0
2647	3	4	2	ACL	ACL	218	247	50	50	11	168	17.909	0
2647	3	5	2	ASA	ASA	4943	5264	49	49	7	4894	745	0
2647	3	6	2	ASA	ASA	5683	5878	50	50	6	5633	971.333	0
2647	3	7	2	BANLEC	BANLEC	3979	3902	50	51	6	3929	641.833	0
2647	3	8	2	BANLEC	BANLEC	5172	5036	50	51	6	5122	830.833	0
2647	3	9	2	BC2L-A	BC2L-A	377	312	50	50	6	327	43.667	0
2647	3	10	2	BC2L-A	BC2L-A	399	347	49	49	6	350	49.667	0
2647	3	11	2	BC2LCN	BC2LCN	68	71	48	49	7	20	3.143	0
2647	3	12	2	BC2LCN	BC2LCN	68	67	49	50	6	19	2.833	0
2647	3	1	3	BPA; BPL	BPA; BPL	202	238	48	49	6	154	31.5	0
2647	3	2	3	BPA; BPL	BPA; BPL	169	186	49	50	6	120	22.667	0
2647	3	3	3	CALSEPA	CALSEPA	2526	2723	51	51	6	2475	445.333	0
2647	3	4	3	CALSEPA	CALSEPA	2783	2653	50	50	9	2733	289.222	0
2647	3	5	3	CGL2	CGL2	3049	2996	50	50	7	2999	420.857	0
2647	3	6	3	CGL2	CGL2	3098	3038	50	51	13	3048	229.769	0
2647	3	7	3	CNL	CNL	56	56	51	51	6	5	0.833	0
2647	3	8	3	CNL	CNL	55	56	50	50	9	5	0.667	0
2647	3	9	3	Con A	Con A	856	897	50	50	6	806	141.167	0
2647	3	10	3	Con A	Con A	900	875	50	50	6	850	137.5	0
2647	3	11	3	DBA	DBA	697	611	48	48	10	649	56.3	0
2647	3	12	3	DBA	DBA	705	626	48	48	6	657	96.333	0
2647	3	1	4	DISCOIDIN I	DISCOIDIN I	51	195	48	48	6	3	24.5	0
2647	3	2	4	DISCOIDIN I	DISCOIDIN I	51	213	48	48	6	3	27.5	0
2647	3	3	4	DISCOIDIN II	DISCOIDIN II	104	101	51	52	11	53	4.455	0
2647	3	4	4	DISCOIDIN II	DISCOIDIN II	113	110	49	49	6	64	10.167	0
2647	3	5	4	DSA	DSA	1580	1628	49	49	6	1531	263.167	0
2647	3	6	4	DSA	DSA	1558	1550	49	49	6	1509	250.167	0
2647	3	7	4	ECA	ECA	117	114	51	51	6	66	10.5	0
2647	3	8	4	ECA	ECA	125	133	50	50	6	75	13.833	0
2647	3	9	4	EEL	EEL	1553	1454	50	50	6	1503	234	0
2647	3	10	4	EEL	EEL	1563	1481	51	51	6	1512	238.333	0
2647	3	11	4	F17AG	F17AG	90	90	49	49	6	41	6.833	0
2647	3	12	4	F17AG	F17AG	90	98	49	49	6	41	8.167	0
2647	3	1	5	GAL1	GAL1	206	217	48	49	6	158	28	0
2647	3	2	5	GAL1	GAL1	264	275	50	50	6	214	37.5	0
2647	3	3	5	GAL1-S	GAL1-S	49	50	51	52	6	-2	-0.333	0
2647	3	4	5	GAL1-S	GAL1-S	48	48	50	50	6	-2	-0.333	0
2647	3	5	5	GAL2	GAL2	82	88	50	50	6	32	6.333	0
2647	3	6	5	GAL2	GAL2	89	95	50	50	6	39	7.5	0
2647	3	7	5	GAL3	GAL3	727	668	50	51	6	677	102.833	0
2647	3	8	5	GAL3	GAL3	744	673	50	51	6	694	103.667	0
2647	3	9	5	GAL3C-S	GAL3C-S	280	259	49	49	7	231	30	0
2647	3	10	5	GAL3C-S	GAL3C-S	186	185	50	50	6	136	22.5	0
2647	3	11	5	GAL7-S	GAL7-S	53	53	50	50	6	3	0.5	0
2647	3	12	5	GAL7-S	GAL7-S	54	54	50	50	6	4	0.667	0
2647	3	1	6	GAL9	GAL9	431	415	48	48	6	383	61.167	0
2647	3	2	6	GAL9	GAL9	444	420	50	50	7	394	52.857	0
2647	3	3	6	GNA	GNA	14162	14051	51	55	46	14111	304.261	0
2647	3	4	6	GNA	GNA	12538	12808	52	60	95	12486	134.189	0
2647	3	5	6	GRFT	GRFT	5017	4519	50	50	6	4967	744.833	0
2647	3	6	6	GRFT	GRFT	5348	5074	50	50	6	5298	837.333	0
2647	3	7	6	GS-I;?GSL-I	GS-I;?GSL-I	114	106	50	50	6	64	9.333	0
2647	3	8	6	GS-I;?GSL-I	GS-I;?GSL-I	114	109	50	50	6	64	9.833	0
2647	3	9	6	GS-II; GSL-II	GS-II; GSL-II	246	249	50	53	86	196	2.279	0
2647	3	10	6	GS-II; GSL-II	GS-II; GSL-II	247	245	49	50	18	198	10.833	0
2647	3	11	6	HHA; HHL	HHA; HHL	15672	14373	50	50	6	15622	2387.17	0
2647	3	12	6	HHA; HHL	HHA; HHL	16855	15036	50	50	7	16805	2140.86	0
2647	3	1	7	Jacalin	Jacalin	278	279	47	47	5	231	46.4	0
2647	3	2	7	Jacalin	Jacalin	344	359	49	49	6	295	51.667	0
2647	3	3	7	LBA	LBA	152	154	49	50	6	103	17.333	0
2647	3	4	7	LBA	LBA	487	495	51	51	6	436	74	0
2647	3	5	7	LcH A	LcH A	339	330	50	50	6	289	46.667	0
2647	3	6	7	LcH A	LcH A	344	346	50	50	6	294	49.333	0
2647	3	7	7	LEA	LEA	247	227	51	52	8	196	21.875	0
2647	3	8	7	LEA	LEA	246	224	51	52	10	195	17.2	0
2647	3	9	7	LENTIL	LENTIL	151	162	50	50	6	101	18.667	0
2647	3	10	7	LENTIL	LENTIL	164	170	49	49	6	115	20.167	0
2647	3	11	7	Lotus	Lotus	65	329	49	49	6	16	46.667	0
2647	3	12	7	Lotus	Lotus	65	241	49	50	7	16	27.286	0
2647	3	1	8	LSL-N	LSL-N	115	111	47	47	5	68	12.8	0
2647	3	2	8	LSL-N	LSL-N	121	123	48	49	20	73	3.7	0
2647	3	3	8	MAA; MAL	MAA; MAL	3480	3047	50	50	11	3430	272.455	0
2647	3	4	8	MAA; MAL	MAA; MAL	3543	3039	51	51	6	3492	498	0
2647	3	5	8	MALECTIN	MALECTIN	145	135	50	50	6	95	14.167	0
2647	3	6	8	MALECTIN	MALECTIN	148	139	50	50	6	98	14.833	0
2647	3	7	8	MOA	MOA	382	362	50	50	6	332	52	0
2647	3	8	8	MOA	MOA	414	397	50	51	6	364	57.667	0
2647	3	9	8	MPL; MPA	MPL; MPA	255	249	50	50	6	205	33.167	0
2647	3	10	8	MPL; MPA	MPL; MPA	270	261	49	49	6	221	35.333	0
2647	3	11	8	NPA	NPA	5644	5918	49	53	64	5595	91.641	0
2647	3	12	8	NPA	NPA	5111	5239	47	47	6	5064	865.333	0
2647	3	1	9	ORYSATA	ORYSATA	739	703	47	48	6	692	109.167	0
2647	3	2	9	ORYSATA	ORYSATA	811	749	48	49	5	763	140	0
2647	3	3	9	PA-IIL	PA-IIL	114	188	49	49	6	65	23.167	0
2647	3	4	9	PA-IIL	PA-IIL	78	171	49	50	6	29	20.167	0
2647	3	5	9	PA-IL	PA-IL	64	65	50	50	6	14	2.5	0
2647	3	6	9	PA-IL	PA-IL	62	63	50	50	6	12	2.167	0
2647	3	7	9	PALa	PALa	140	314	49	50	6	91	44	0
2647	3	8	9	PALa	PALa	168	349	49	50	6	119	49.833	0
2647	3	9	9	PHA-E	PHA-E	1840	1698	50	50	6	1790	274.667	0
2647	3	10	9	PHA-E	PHA-E	1480	1365	49	50	7	1431	187.857	0
2647	3	11	9	PHA-L	PHA-L	525	514	49	49	10	476	46.5	0
2647	3	12	9	PHA-L	PHA-L	529	520	47	62	453	482	1.011	0
2647	3	1	10	PHA-P	PHA-P	174	173	48	48	6	126	20.833	0
2647	3	2	10	PHA-P	PHA-P	191	184	49	49	6	142	22.5	0
2647	3	3	10	PNA	PNA	153	162	50	50	6	103	18.667	0
2647	3	4	10	PNA	PNA	153	160	50	51	29	103	3.759	0
2647	3	5	10	PPL	PPL	109	122	51	51	7	58	10.143	0
2647	3	6	10	PPL	PPL	100	107	50	50	5	50	11.4	0
2647	3	7	10	PSA/PEA	PSA/PEA	201	210	49	50	6	152	26.667	0
2647	3	8	10	PSA/PEA	PSA/PEA	203	212	50	51	8	153	20.125	0
2647	3	9	10	PSL1A	PSL1A	26303	29320	50	50	6	26253	4878.33	0
2647	3	10	10	PSL1A	PSL1A	17010	18677	49	49	6	16961	3104.67	0
2647	3	11	10	PTL	PTL	59	60	48	49	6	11	1.833	0
2647	3	12	10	PTL	PTL	53	52	46	46	6	7	1	0
2647	3	1	11	RS-FUC	RS-FUC	229	222	48	49	6	181	28.833	0
2647	3	2	11	RS-FUC	RS-FUC	208	202	49	49	6	159	25.5	0
2647	3	3	11	SAMB	SAMB	10802	10774	51	90	137	10751	77.985	0
2647	3	4	11	SAMB	SAMB	10068	9443	53	104	179	10015	52.173	0
2647	3	5	11	SBA	SBA	133	153	49	49	5	84	20.8	0
2647	3	6	11	SBA	SBA	126	135	50	51	17	76	4.941	0
2647	3	7	11	SJA	SJA	62	62	51	51	13	11	0.846	0
2647	3	8	11	SJA	SJA	61	61	50	51	6	11	1.667	0
2647	3	9	11	SNA-I	SNA-I	596	661	50	50	6	546	101.833	0
2647	3	10	11	SNA-I	SNA-I	865	734	50	50	8	815	85.5	0
2647	3	11	11	SNA-II	SNA-II	74	75	47	47	5	27	5.6	0
2647	3	12	11	SNA-II	SNA-II	71	74	46	46	5	25	5.6	0
2647	3	1	12	STL	STL	998	922	48	48	6	950	145.667	0
2647	3	2	12	STL	STL	1118	1026	48	48	6	1070	163	0
2647	3	3	12	UDA	UDA	100	100	50	52	10	50	4.8	0
2647	3	4	12	UDA	UDA	95	99	50	51	10	45	4.8	0
2647	3	5	12	UEA I	UEA I	540	520	51	51	8	489	58.625	0
2647	3	6	12	UEA I	UEA I	559	526	51	51	6	508	79.167	0
2647	3	7	12	UEA-II	UEA-II	119	116	51	51	6	68	10.833	0
2647	3	8	12	UEA-II	UEA-II	112	110	50	50	6	62	10	0
2647	3	9	12	VFA	VFA	85	153	49	51	30	36	3.4	0
2647	3	10	12	VFA	VFA	95	148	47	48	6	48	16.667	0
2647	3	11	12	VVA	VVA	5063	4993	47	47	9	5016	549.556	0
2647	3	12	12	VVA	VVA	5069	4988	47	47	6	5022	823.5	0
2647	3	1	13	WFA	WFA	80	88	47	47	6	33	6.833	0
2647	3	2	13	WFA	WFA	91	99	47	47	6	44	8.667	0
2647	3	3	13	WGA	WGA	144	271	48	48	5	96	44.6	0
2647	3	4	13	WGA	WGA	147	329	48	48	5	99	56.2	0
2647	3	5	13	NEG	NEG	46	174	48	49	6	-2	20.833	0
2647	3	6	13	NEG	NEG	46	190	48	49	8	-2	17.625	0
2647	3	7	13	NEG	NEG	47	101	49	51	10	-2	5	0
2647	3	8	13	NEG	NEG	48	161	48	48	5	0	22.6	0
2647	3	9	13	POS2	POS2	3403	4826	48	51	112	3355	42.634	0
2647	3	10	13	POS2	POS2	3516	5632	46	46	5	3470	1117.2	0
2647	3	11	13	POS1	POS1	18270	16886	45	46	14	18225	1202.86	0
2647	3	12	13	POS1	POS1	19775	17029	46	46	6	19729	2830.5	0
3122	4	1	1	POS1	POS1	18219	15246	44	45	6	18175	2533.5	0
3122	4	2	1	POS1	POS1	20916	18619	46	46	6	20870	3095.5	0
3122	4	3	1	POS2	POS2	2588	3186	46	46	6	2542	523.333	0
3122	4	4	1	POS2	POS2	3020	3989	48	50	52	2972	75.75	0
3122	4	5	1	NEG	NEG	43	48	48	48	6	-5	0	0
3122	4	6	1	NEG	NEG	42	47	47	47	10	-5	0	0
3122	4	7	1	NEG	NEG	44	48	47	47	5	-3	0.2	0
3122	4	8	1	NEG	NEG	43	48	46	47	6	-3	0.167	0
3122	4	9	1	AAA	AAA	127	122	48	49	17	79	4.294	0
3122	4	10	1	AAA	AAA	121	112	49	50	9	72	6.889	0
3122	4	11	1	AAL	AAL	820	747	50	51	6	770	116	0
3122	4	12	1	AAL	AAL	795	731	51	51	6	744	113.333	0
3122	4	1	2	ACG	ACG	694	543	45	49	35	649	14.114	0
3122	4	2	2	ACG	ACG	730	592	43	46	36	687	15.167	0
3122	4	3	2	ACL	ACL	222	209	44	44	6	178	27.5	0
3122	4	4	2	ACL	ACL	242	239	47	47	8	195	24	0
3122	4	5	2	ASA	ASA	4413	4676	47	47	7	4366	661.286	0
3122	4	6	2	ASA	ASA	5199	5165	46	48	15	5153	341.133	0
3122	4	7	2	BANLEC	BANLEC	3860	3627	46	46	5	3814	716.2	0
3122	4	8	2	BANLEC	BANLEC	4932	4448	46	47	20	4886	220.05	0
3122	4	9	2	BC2L-A	BC2L-A	345	272	47	47	7	298	32.143	0
3122	4	10	2	BC2L-A	BC2L-A	363	297	49	49	6	314	41.333	0
3122	4	11	2	BC2LCN	BC2LCN	67	67	49	50	6	18	2.833	0
3122	4	12	2	BC2LCN	BC2LCN	69	70	49	49	6	20	3.5	0
3122	4	1	3	BPA; BPL	BPA; BPL	160	170	45	47	53	115	2.321	0
3122	4	2	3	BPA; BPL	BPA; BPL	160	152	43	43	6	117	18.167	0
3122	4	3	3	CALSEPA	CALSEPA	2939	2694	44	45	7	2895	378.429	0
3122	4	4	3	CALSEPA	CALSEPA	3533	3827	48	50	23	3485	164.217	0
3122	4	5	3	CGL2	CGL2	3475	3596	48	51	14	3427	253.214	0
3122	4	6	3	CGL2	CGL2	3818	3997	48	53	18	3770	219.111	0
3122	4	7	3	CNL	CNL	55	56	46	47	5	9	1.8	0
3122	4	8	3	CNL	CNL	53	53	47	47	6	6	1	0
3122	4	9	3	Con A	Con A	2393	2196	48	48	6	2345	358	0
3122	4	10	3	Con A	Con A	2660	2435	49	49	6	2611	397.667	0
3122	4	11	3	DBA	DBA	709	597	49	49	6	660	91.333	0
3122	4	12	3	DBA	DBA	695	579	49	49	6	646	88.333	0
3122	4	1	4	DISCOIDIN I	DISCOIDIN I	49	201	43	44	6	6	26.167	0
3122	4	2	4	DISCOIDIN I	DISCOIDIN I	45	202	42	42	5	3	32	0
3122	4	3	4	DISCOIDIN II	DISCOIDIN II	109	101	45	46	10	64	5.5	0
3122	4	4	4	DISCOIDIN II	DISCOIDIN II	121	110	47	47	8	74	7.875	0
3122	4	5	4	DSA	DSA	1934	2027	47	51	44	1887	44.909	0
3122	4	6	4	DSA	DSA	2127	2148	45	45	6	2082	350.5	0
3122	4	7	4	ECA	ECA	167	159	48	49	26	119	4.231	0
3122	4	8	4	ECA	ECA	153	153	48	48	6	105	17.5	0
3122	4	9	4	EEL	EEL	270	253	48	48	6	222	34.167	0
3122	4	10	4	EEL	EEL	280	259	48	49	6	232	35	0
3122	4	11	4	F17AG	F17AG	89	87	48	49	6	41	6.333	0
3122	4	12	4	F17AG	F17AG	90	87	48	49	7	42	5.429	0
3122	4	1	5	GAL1	GAL1	174	181	44	44	6	130	22.833	0
3122	4	2	5	GAL1	GAL1	227	226	42	43	12	185	15.25	0
3122	4	3	5	GAL1-S	GAL1-S	81	82	43	43	5	38	7.8	0
3122	4	4	5	GAL1-S	GAL1-S	86	88	48	49	30	38	1.3	0
3122	4	5	5	GAL2	GAL2	71	73	47	48	6	24	4.167	0
3122	4	6	5	GAL2	GAL2	70	69	46	46	6	24	3.833	0
3122	4	7	5	GAL3	GAL3	884	779	48	49	6	836	121.667	0
3122	4	8	5	GAL3	GAL3	887	769	47	48	7	840	103	0
3122	4	9	5	GAL3C-S	GAL3C-S	222	221	48	48	6	174	28.833	0
3122	4	10	5	GAL3C-S	GAL3C-S	202	200	48	48	6	154	25.333	0
3122	4	11	5	GAL7-S	GAL7-S	78	94	49	51	9	29	4.778	0
3122	4	12	5	GAL7-S	GAL7-S	56	57	48	48	7	8	1.286	0
3122	4	1	6	GAL9	GAL9	439	413	45	45	6	394	61.333	0
3122	4	2	6	GAL9	GAL9	455	413	44	44	11	411	33.545	0
3122	4	3	6	GNA	GNA	11741	11833	47	56	72	11694	163.569	0
3122	4	4	6	GNA	GNA	10468	10966	48	64	192	10420	56.781	0
3122	4	5	6	GRFT	GRFT	3811	3439	48	48	6	3763	565.167	0
3122	4	6	6	GRFT	GRFT	3906	3498	46	46	6	3860	575.333	0
3122	4	7	6	GS-I;?GSL-I	GS-I;?GSL-I	262	247	47	47	6	215	33.333	0
3122	4	8	6	GS-I;?GSL-I	GS-I;?GSL-I	189	171	48	48	6	141	20.5	0
3122	4	9	6	GS-II; GSL-II	GS-II; GSL-II	238	235	49	49	6	189	31	0
3122	4	10	6	GS-II; GSL-II	GS-II; GSL-II	201	201	49	49	7	152	21.714	0
3122	4	11	6	HHA; HHL	HHA; HHL	13019	11879	50	50	6	12969	1971.5	0
3122	4	12	6	HHA; HHL	HHA; HHL	14492	12912	46	46	7	14446	1838	0
3122	4	1	7	Jacalin	Jacalin	315	299	47	47	6	268	42	0
3122	4	2	7	Jacalin	Jacalin	348	331	42	43	5	306	57.6	0
3122	4	3	7	LBA	LBA	86	79	43	43	5	43	7.2	0
3122	4	4	7	LBA	LBA	179	197	46	46	6	133	25.167	0
3122	4	5	7	LcH A	LcH A	420	424	45	45	6	375	63.167	0
3122	4	6	7	LcH A	LcH A	365	368	43	43	5	322	65	0
3122	4	7	7	LEA	LEA	212	201	47	48	8	165	19.125	0
3122	4	8	7	LEA	LEA	208	189	49	49	9	159	15.556	0
3122	4	9	7	LENTIL	LENTIL	207	200	48	48	7	159	21.714	0
3122	4	10	7	LENTIL	LENTIL	221	219	48	49	9	173	18.889	0
3122	4	11	7	Lotus	Lotus	63	202	49	49	7	14	21.857	0
3122	4	12	7	Lotus	Lotus	62	185	48	51	14	14	9.571	0
3122	4	1	8	LSL-N	LSL-N	191	167	44	46	34	147	3.559	0
3122	4	2	8	LSL-N	LSL-N	174	147	42	43	10	132	10.4	0
3122	4	3	8	MAA; MAL	MAA; MAL	3599	3088	43	44	14	3556	217.429	0
3122	4	4	8	MAA; MAL	MAA; MAL	4112	3523	46	48	36	4066	96.528	0
3122	4	5	8	MALECTIN	MALECTIN	156	148	41	41	6	115	17.833	0
3122	4	6	8	MALECTIN	MALECTIN	158	150	42	43	5	116	21.4	0
3122	4	7	8	MOA	MOA	100	98	44	45	5	56	10.6	0
3122	4	8	8	MOA	MOA	103	101	47	47	6	56	9	0
3122	4	9	8	MPL; MPA	MPL; MPA	183	161	48	50	31	135	3.581	0
3122	4	10	8	MPL; MPA	MPL; MPA	203	177	48	50	13	155	9.769	0
3122	4	11	8	NPA	NPA	3226	3199	49	50	13	3177	242.231	0
3122	4	12	8	NPA	NPA	3975	4090	45	54	226	3930	17.858	0
3122	4	1	9	ORYSATA	ORYSATA	792	725	44	45	9	748	75.556	0
3122	4	2	9	ORYSATA	ORYSATA	1047	929	44	46	11	1003	80.273	0
3122	4	3	9	PA-IIL	PA-IIL	154	234	42	43	13	112	14.692	0
3122	4	4	9	PA-IIL	PA-IIL	200	297	42	43	6	158	42.333	0
3122	4	5	9	PA-IL	PA-IL	60	60	41	42	5	19	3.6	0
3122	4	6	9	PA-IL	PA-IL	58	58	42	42	5	16	3.2	0
3122	4	7	9	PALa	PALa	193	649	46	47	7	147	86	0
3122	4	8	9	PALa	PALa	356	654	47	47	7	309	86.714	0
3122	4	9	9	PHA-E	PHA-E	2436	2240	48	48	8	2388	274	0
3122	4	10	9	PHA-E	PHA-E	2263	2002	48	48	6	2215	325.667	0
3122	4	11	9	PHA-L	PHA-L	736	691	48	48	6	688	107.167	0
3122	4	12	9	PHA-L	PHA-L	775	713	45	46	7	730	95.286	0
3122	4	1	10	PHA-P	PHA-P	189	196	43	44	7	146	21.714	0
3122	4	2	10	PHA-P	PHA-P	166	172	43	44	8	123	16	0
3122	4	3	10	PNA	PNA	159	166	42	43	6	117	20.5	0
3122	4	4	10	PNA	PNA	168	178	42	42	5	126	27.2	0
3122	4	5	10	PPL	PPL	90	103	42	42	7	48	8.714	0
3122	4	6	10	PPL	PPL	91	98	43	43	5	48	11	0
3122	4	7	10	PSA/PEA	PSA/PEA	264	241	44	45	5	220	39.2	0
3122	4	8	10	PSA/PEA	PSA/PEA	247	286	46	46	13	201	18.462	0
3122	4	9	10	PSL1A	PSL1A	18680	21701	47	48	6	18633	3608.83	0
3122	4	10	10	PSL1A	PSL1A	15670	17514	47	47	9	15623	1940.78	0
3122	4	11	10	PTL	PTL	55	54	48	49	14	7	0.357	0
3122	4	12	10	PTL	PTL	52	52	43	43	5	9	1.8	0
3122	4	1	11	RS-FUC	RS-FUC	406	375	44	44	7	362	47.286	0
3122	4	2	11	RS-FUC	RS-FUC	388	367	43	43	5	345	64.8	0
3122	4	3	11	SAMB	SAMB	10594	9872	44	87	140	10550	69.893	0
3122	4	4	11	SAMB	SAMB	10361	9829	45	110	197	10316	49.335	0
3122	4	5	11	SBA	SBA	86	103	43	43	5	43	12	0
3122	4	6	11	SBA	SBA	83	122	43	85	1051	40	0.035	0
3122	4	7	11	SJA	SJA	61	59	43	44	6	18	2.5	0
3122	4	8	11	SJA	SJA	65	62	45	47	18	20	0.833	0
3122	4	9	11	SNA-I	SNA-I	894	857	47	47	6	847	135	0
3122	4	10	11	SNA-I	SNA-I	1108	1091	45	46	6	1063	174.167	0
3122	4	11	11	SNA-II	SNA-II	71	69	46	46	6	25	3.833	0
3122	4	12	11	SNA-II	SNA-II	69	71	43	43	5	26	5.6	0
3122	4	1	12	STL	STL	1268	1163	44	45	7	1224	159.714	0
3122	4	2	12	STL	STL	1154	988	44	45	8	1110	117.875	0
3122	4	3	12	UDA	UDA	93	87	46	49	12	47	3.167	0
3122	4	4	12	UDA	UDA	93	88	45	49	17	48	2.294	0
3122	4	5	12	UEA I	UEA I	974	921	44	44	6	930	146.167	0
3122	4	6	12	UEA I	UEA I	1012	967	43	44	7	969	131.857	0
3122	4	7	12	UEA-II	UEA-II	116	110	43	44	8	73	8.25	0
3122	4	8	12	UEA-II	UEA-II	110	106	45	50	31	65	1.806	0
3122	4	9	12	VFA	VFA	104	104	45	45	5	59	11.8	0
3122	4	10	12	VFA	VFA	96	110	46	46	5	50	12.8	0
3122	4	11	12	VVA	VVA	5037	4583	46	47	15	4991	302.4	0
3122	4	12	12	VVA	VVA	5054	4645	44	48	49	5010	93.816	0
3122	4	1	13	WFA	WFA	83	82	43	43	6	40	6.5	0
3122	4	2	13	WFA	WFA	81	75	43	43	8	38	4	0
3122	4	3	13	WGA	WGA	114	200	42	42	5	72	31.6	0
3122	4	4	13	WGA	WGA	123	203	42	43	8	81	20	0
3122	4	5	13	NEG	NEG	40	124	43	43	12	-3	6.75	0
3122	4	6	13	NEG	NEG	44	146	43	44	5	1	20.4	0
3122	4	7	13	NEG	NEG	42	104	46	54	26	-4	1.923	0
3122	4	8	13	NEG	NEG	66	173	176	190	76	-110	-0.224	0
3122	4	9	13	POS2	POS2	2881	4326	129	161	163	2752	25.552	0
3122	4	10	13	POS2	POS2	3222	4666	45	45	6	3177	770.167	0
3122	4	11	13	POS1	POS1	17604	15275	43	43	5	17561	3046.4	0
3122	4	12	13	POS1	POS1	19642	16442	45	46	17	19597	964.471	0
2649	5	1	1	POS1	POS1	18250	15522	51	51	6	18199	2578.5	0
2649	5	2	1	POS1	POS1	19933	16766	51	51	7	19882	2387.86	0
2649	5	3	1	POS2	POS2	2697	3351	51	51	7	2646	471.429	0
2649	5	4	1	POS2	POS2	2927	4126	53	53	7	2874	581.857	0
2649	5	5	1	NEG	NEG	52	57	57	61	118	-5	-0.034	0
2649	5	6	1	NEG	NEG	49	55	54	55	7	-5	0	0
2649	5	7	1	NEG	NEG	49	53	56	56	9	-7	-0.333	0
2649	5	8	1	NEG	NEG	49	54	56	56	7	-7	-0.286	0
2649	5	9	1	AAA	AAA	131	133	56	57	10	75	7.6	0
2649	5	10	1	AAA	AAA	134	131	55	56	10	79	7.5	0
2649	5	11	1	AAL	AAL	601	533	56	57	7	545	68	0
2649	5	12	1	AAL	AAL	615	557	59	60	7	556	71	0
2649	5	1	2	ACG	ACG	619	584	49	50	9	570	59.333	0
2649	5	2	2	ACG	ACG	609	608	49	49	7	560	79.857	0
2649	5	3	2	ACL	ACL	248	249	49	50	6	199	33.167	0
2649	5	4	2	ACL	ACL	269	301	50	51	6	219	41.667	0
2649	5	5	2	ASA	ASA	5737	6163	54	54	7	5683	872.714	0
2649	5	6	2	ASA	ASA	6591	6676	54	54	7	6537	946	0
2649	5	7	2	BANLEC	BANLEC	4489	4132	53	54	7	4436	582.571	0
2649	5	8	2	BANLEC	BANLEC	4456	3982	53	53	7	4403	561.286	0
2649	5	9	2	BC2L-A	BC2L-A	450	372	54	55	7	396	45.286	0
2649	5	10	2	BC2L-A	BC2L-A	464	384	54	54	12	410	27.5	0
2649	5	11	2	BC2LCN	BC2LCN	69	73	54	54	6	15	3.167	0
2649	5	12	2	BC2LCN	BC2LCN	71	75	56	57	7	15	2.571	0
2649	5	1	3	BPA; BPL	BPA; BPL	190	242	50	50	7	140	27.429	0
2649	5	2	3	BPA; BPL	BPA; BPL	170	174	50	50	6	120	20.667	0
2649	5	3	3	CALSEPA	CALSEPA	2444	2318	52	53	9	2392	251.667	0
2649	5	4	3	CALSEPA	CALSEPA	3571	3912	52	52	7	3519	551.429	0
2649	5	5	3	CGL2	CGL2	3642	3992	52	52	6	3590	656.667	0
2649	5	6	3	CGL2	CGL2	3265	3294	52	53	7	3213	463	0
2649	5	7	3	CNL	CNL	68	68	54	55	7	14	1.857	0
2649	5	8	3	CNL	CNL	61	61	57	57	7	4	0.571	0
2649	5	9	3	Con A	Con A	623	642	72	74	15	551	37.867	0
2649	5	10	3	Con A	Con A	1099	1028	55	56	8	1044	121.5	0
2649	5	11	3	DBA	DBA	788	687	53	60	129	735	4.86	0
2649	5	12	3	DBA	DBA	806	693	55	56	7	751	91	0
2649	5	1	4	DISCOIDIN I	DISCOIDIN I	49	203	49	49	6	0	25.667	0
2649	5	2	4	DISCOIDIN I	DISCOIDIN I	58	226	48	49	6	10	29.5	0
2649	5	3	4	DISCOIDIN II	DISCOIDIN II	103	93	50	51	9	53	4.667	0
2649	5	4	4	DISCOIDIN II	DISCOIDIN II	104	98	50	51	9	54	5.222	0
2649	5	5	4	DSA	DSA	1649	1582	50	50	7	1599	218.857	0
2649	5	6	4	DSA	DSA	1721	1618	51	51	6	1670	261.167	0
2649	5	7	4	ECA	ECA	124	118	52	53	6	72	10.833	0
2649	5	8	4	ECA	ECA	133	134	55	56	7	78	11.143	0
2649	5	9	4	EEL	EEL	368	347	57	59	30	311	9.6	0
2649	5	10	4	EEL	EEL	383	354	54	54	7	329	42.857	0
2649	5	11	4	F17AG	F17AG	93	93	53	55	42	40	0.905	0
2649	5	12	4	F17AG	F17AG	90	93	54	54	6	36	6.5	0
2649	5	1	5	GAL1	GAL1	159	322	48	49	6	111	45.5	0
2649	5	2	5	GAL1	GAL1	192	212	49	49	5	143	32.6	0
2649	5	3	5	GAL1-S	GAL1-S	50	50	51	51	6	-1	-0.167	0
2649	5	4	5	GAL1-S	GAL1-S	53	55	51	51	6	2	0.667	0
2649	5	5	5	GAL2	GAL2	74	76	51	52	6	23	4	0
2649	5	6	5	GAL2	GAL2	70	72	52	53	29	18	0.655	0
2649	5	7	5	GAL3	GAL3	795	726	52	52	6	743	112.333	0
2649	5	8	5	GAL3	GAL3	797	728	52	52	6	745	112.667	0
2649	5	9	5	GAL3C-S	GAL3C-S	206	209	54	55	7	152	22	0
2649	5	10	5	GAL3C-S	GAL3C-S	216	210	55	55	7	161	22.143	0
2649	5	11	5	GAL7-S	GAL7-S	54	55	53	53	7	1	0.286	0
2649	5	12	5	GAL7-S	GAL7-S	57	58	53	53	7	4	0.714	0
2649	5	1	6	GAL9	GAL9	476	455	49	50	12	427	33.75	0
2649	5	2	6	GAL9	GAL9	512	489	50	51	10	462	43.8	0
2649	5	3	6	GNA	GNA	16712	17209	53	54	9	16659	1906.11	0
2649	5	4	6	GNA	GNA	17650	18475	54	56	35	17596	526.257	0
2649	5	5	6	GRFT	GRFT	5665	5222	53	53	6	5612	861.5	0
2649	5	6	6	GRFT	GRFT	5703	5157	52	53	6	5651	850.667	0
2649	5	7	6	GS-I;?GSL-I	GS-I;?GSL-I	112	103	53	53	6	59	8.333	0
2649	5	8	6	GS-I;?GSL-I	GS-I;?GSL-I	120	112	53	52	6	67	10	0
2649	5	9	6	GS-II; GSL-II	GS-II; GSL-II	254	248	52	53	7	202	27.857	0
2649	5	10	6	GS-II; GSL-II	GS-II; GSL-II	255	254	54	54	7	201	28.571	0
2649	5	11	6	HHA; HHL	HHA; HHL	18084	16319	56	56	7	18028	2323.29	0
2649	5	12	6	HHA; HHL	HHA; HHL	18774	17223	53	54	7	18721	2452.71	0
2649	5	1	7	Jacalin	Jacalin	253	258	49	50	13	204	16	0
2649	5	2	7	Jacalin	Jacalin	325	347	50	50	6	275	49.5	0
2649	5	3	7	LBA	LBA	121	124	50	51	6	71	12.167	0
2649	5	4	7	LBA	LBA	774	799	52	53	6	722	124.333	0
2649	5	5	7	LcH A	LcH A	367	368	52	53	6	315	52.5	0
2649	5	6	7	LcH A	LcH A	365	364	52	53	6	313	51.833	0
2649	5	7	7	LEA	LEA	284	282	55	56	7	229	32.286	0
2649	5	8	7	LEA	LEA	287	287	57	57	7	230	32.857	0
2649	5	9	7	LENTIL	LENTIL	169	172	53	53	6	116	19.833	0
2649	5	10	7	LENTIL	LENTIL	174	173	52	52	6	122	20.167	0
2649	5	11	7	Lotus	Lotus	71	328	54	55	7	17	39	0
2649	5	12	7	Lotus	Lotus	62	332	53	53	7	9	39.857	0
2649	5	1	8	LSL-N	LSL-N	143	139	48	48	5	95	18.2	0
2649	5	2	8	LSL-N	LSL-N	150	142	49	50	18	101	5.111	0
2649	5	3	8	MAA; MAL	MAA; MAL	3610	3206	50	50	6	3560	526	0
2649	5	4	8	MAA; MAL	MAA; MAL	3706	3344	52	52	8	3654	411.5	0
2649	5	5	8	MALECTIN	MALECTIN	146	142	53	53	6	93	14.833	0
2649	5	6	8	MALECTIN	MALECTIN	152	143	52	52	6	100	15.167	0
2649	5	7	8	MOA	MOA	100	98	53	54	11	47	4	0
2649	5	8	8	MOA	MOA	95	96	53	53	6	42	7.167	0
2649	5	9	8	MPL; MPA	MPL; MPA	190	188	52	53	6	138	22.5	0
2649	5	10	8	MPL; MPA	MPL; MPA	191	186	52	52	6	139	22.333	0
2649	5	11	8	NPA	NPA	6564	6694	52	58	56	6512	118.5	0
2649	5	12	8	NPA	NPA	5793	5847	52	53	18	5741	321.889	0
2649	5	1	9	ORYSATA	ORYSATA	949	847	48	48	6	901	133.167	0
2649	5	2	9	ORYSATA	ORYSATA	1025	937	49	49	15	976	59.2	0
2649	5	3	9	PA-IIL	PA-IIL	118	202	51	51	6	67	25.167	0
2649	5	4	9	PA-IIL	PA-IIL	191	241	52	52	8	139	23.625	0
2649	5	5	9	PA-IL	PA-IL	63	63	52	52	6	11	1.833	0
2649	5	6	9	PA-IL	PA-IL	66	65	52	52	6	14	2.167	0
2649	5	7	9	PALa	PALa	148	398	52	52	6	96	57.667	0
2649	5	8	9	PALa	PALa	263	426	53	53	7	210	53.286	0
2649	5	9	9	PHA-E	PHA-E	1808	1636	53	54	7	1755	226	0
2649	5	10	9	PHA-E	PHA-E	1839	1691	52	53	6	1787	273	0
2649	5	11	9	PHA-L	PHA-L	625	599	52	53	6	573	91	0
2649	5	12	9	PHA-L	PHA-L	540	515	51	51	6	489	77.333	0
2649	5	1	10	PHA-P	PHA-P	159	166	48	48	6	111	19.667	0
2649	5	2	10	PHA-P	PHA-P	175	175	48	49	5	127	25.2	0
2649	5	3	10	PNA	PNA	207	221	50	50	6	157	28.5	0
2649	5	4	10	PNA	PNA	214	233	51	57	201	163	0.876	0
2649	5	5	10	PPL	PPL	105	125	52	52	7	53	10.429	0
2649	5	6	10	PPL	PPL	109	123	52	52	6	57	11.833	0
2649	5	7	10	PSA/PEA	PSA/PEA	201	198	52	52	6	149	24.333	0
2649	5	8	10	PSA/PEA	PSA/PEA	246	273	52	53	7	194	31.429	0
2649	5	9	10	PSL1A	PSL1A	21193	24145	53	53	9	21140	2676.89	0
2649	5	10	10	PSL1A	PSL1A	26021	29907	52	53	14	25969	2132.43	0
2649	5	11	10	PTL	PTL	62	61	53	53	7	9	1.143	0
2649	5	12	10	PTL	PTL	55	55	52	52	6	3	0.5	0
2649	5	1	11	RS-FUC	RS-FUC	387	378	48	48	5	339	66	0
2649	5	2	11	RS-FUC	RS-FUC	384	348	48	48	6	336	50	0
2649	5	3	11	SAMB	SAMB	10826	10628	51	83	139	10775	75.863	0
2649	5	4	11	SAMB	SAMB	11266	10672	53	84	92	11213	115.087	0
2649	5	5	11	SBA	SBA	116	145	51	51	6	65	15.667	0
2649	5	6	11	SBA	SBA	133	216	51	52	6	82	27.333	0
2649	5	7	11	SJA	SJA	65	64	52	53	6	13	1.833	0
2649	5	8	11	SJA	SJA	66	66	52	52	6	14	2.333	0
2649	5	9	11	SNA-I	SNA-I	615	592	52	53	7	563	77	0
2649	5	10	11	SNA-I	SNA-I	817	749	51	52	6	766	116.167	0
2649	5	11	11	SNA-II	SNA-II	75	75	48	49	6	27	4.333	0
2649	5	12	11	SNA-II	SNA-II	73	72	52	52	7	21	2.857	0
2649	5	1	12	STL	STL	950	878	47	47	5	903	166.2	0
2649	5	2	12	STL	STL	813	746	48	55	131	765	5.275	0
2649	5	3	12	UDA	UDA	101	99	50	52	9	51	5.222	0
2649	5	4	12	UDA	UDA	102	100	51	59	120	51	0.342	0
2649	5	5	12	UEA I	UEA I	1017	985	50	50	11	967	85	0
2649	5	6	12	UEA I	UEA I	786	745	50	51	6	736	115.667	0
2649	5	7	12	UEA-II	UEA-II	118	116	51	52	8	67	8	0
2649	5	8	12	UEA-II	UEA-II	121	118	52	52	6	69	11	0
2649	5	9	12	VFA	VFA	96	170	51	52	24	45	4.917	0
2649	5	10	12	VFA	VFA	88	165	48	49	10	40	11.6	0
2649	5	11	12	VVA	VVA	5488	5297	48	49	9	5440	583.111	0
2649	5	12	12	VVA	VVA	4993	4839	51	81	119	4942	39.983	0
2649	5	1	13	WFA	WFA	83	86	49	49	6	34	6.167	0
2649	5	2	13	WFA	WFA	86	86	48	48	6	38	6.333	0
2649	5	3	13	WGA	WGA	162	304	48	49	6	114	42.5	0
2649	5	4	13	WGA	WGA	182	298	48	49	6	134	41.5	0
2649	5	5	13	NEG	NEG	47	242	48	48	5	-1	38.8	0
2649	5	6	13	NEG	NEG	48	244	49	49	5	-1	39	0
2649	5	7	13	NEG	NEG	49	189	49	59	250	0	0.52	0
2649	5	8	13	NEG	NEG	51	190	49	50	6	2	23.333	0
2649	5	9	13	POS2	POS2	3155	4752	49	49	6	3106	783.833	0
2649	5	10	13	POS2	POS2	3199	4976	46	46	5	3153	986	0
2649	5	11	13	POS1	POS1	17351	15552	46	46	5	17305	3101.2	0
2649	5	12	13	POS1	POS1	19765	17748	52	72	86	19713	205.535	0
3123	6	1	1	POS1	POS1	13851	13226	72	165	560	13779	23.323	0
3123	6	2	1	POS1	POS1	20526	17676	59	60	15	20467	1174.4	0
3123	6	3	1	POS2	POS2	2638	3305	48	48	5	2590	651.4	0
3123	6	4	1	POS2	POS2	2659	3638	44	49	131	2615	27.397	0
3123	6	5	1	NEG	NEG	37	42	43	43	5	-6	-0.2	0
3123	6	6	1	NEG	NEG	41	46	45	45	6	-4	0.167	0
3123	6	7	1	NEG	NEG	39	43	46	46	6	-7	-0.5	0
3123	6	8	1	NEG	NEG	40	44	46	46	6	-6	-0.333	0
3123	6	9	1	AAA	AAA	118	127	48	48	6	70	13.167	0
3123	6	10	1	AAA	AAA	121	142	49	49	7	72	13.286	0
3123	6	11	1	AAL	AAL	538	473	49	49	6	489	70.667	0
3123	6	12	1	AAL	AAL	538	468	49	49	6	489	69.833	0
3123	6	1	2	ACG	ACG	567	465	58	62	24	509	16.792	0
3123	6	2	2	ACG	ACG	633	541	50	52	19	583	25.737	0
3123	6	3	2	ACL	ACL	226	237	46	47	6	180	31.667	0
3123	6	4	2	ACL	ACL	235	255	44	44	5	191	42.2	0
3123	6	5	2	ASA	ASA	4920	5229	43	44	33	4877	157.121	0
3123	6	6	2	ASA	ASA	5201	5232	43	43	5	5158	1037.8	0
3123	6	7	2	BANLEC	BANLEC	4753	4443	43	43	5	4710	880	0
3123	6	8	2	BANLEC	BANLEC	5289	4929	44	45	6	5245	814	0
3123	6	9	2	BC2L-A	BC2L-A	390	332	47	49	44	343	6.432	0
3123	6	10	2	BC2L-A	BC2L-A	419	353	48	48	6	371	50.833	0
3123	6	11	2	BC2LCN	BC2LCN	67	65	48	49	10	19	1.6	0
3123	6	12	2	BC2LCN	BC2LCN	66	73	47	137	1962	19	-0.033	0
3123	6	1	3	BPA; BPL	BPA; BPL	160	144	49	51	13	111	7.154	0
3123	6	2	3	BPA; BPL	BPA; BPL	157	183	51	53	12	106	10.833	0
3123	6	3	3	CALSEPA	CALSEPA	2837	2629	47	48	8	2790	322.625	0
3123	6	4	3	CALSEPA	CALSEPA	3170	3163	44	45	7	3126	445.429	0
3123	6	5	3	CGL2	CGL2	2701	4221	44	57	148	2657	28.135	0
3123	6	6	3	CGL2	CGL2	3634	3428	43	44	19	3591	178.105	0
3123	6	7	3	CNL	CNL	55	54	43	43	5	12	2.2	0
3123	6	8	3	CNL	CNL	55	55	44	45	7	11	1.429	0
3123	6	9	3	Con A	Con A	1488	1361	47	48	11	1441	119.364	0
3123	6	10	3	Con A	Con A	1342	1129	48	50	21	1294	51.381	0
3123	6	11	3	DBA	DBA	665	578	48	48	12	617	44.167	0
3123	6	12	3	DBA	DBA	682	603	46	46	6	636	92.833	0
3123	6	1	4	DISCOIDIN I	DISCOIDIN I	52	185	47	47	5	5	27.6	0
3123	6	2	4	DISCOIDIN I	DISCOIDIN I	47	201	44	50	173	3	0.873	0
3123	6	3	4	DISCOIDIN II	DISCOIDIN II	106	98	44	45	9	62	5.889	0
3123	6	4	4	DISCOIDIN II	DISCOIDIN II	109	104	43	44	7	66	8.571	0
3123	6	5	4	DSA	DSA	1517	1468	42	42	10	1475	142.6	0
3123	6	6	4	DSA	DSA	1501	1377	42	42	6	1459	222.5	0
3123	6	7	4	ECA	ECA	163	143	43	43	15	120	6.667	0
3123	6	8	4	ECA	ECA	149	137	44	44	6	105	15.5	0
3123	6	9	4	EEL	EEL	1203	875	46	60	109	1157	7.477	0
3123	6	10	4	EEL	EEL	1356	1005	47	60	96	1309	9.844	0
3123	6	11	4	F17AG	F17AG	88	84	46	46	6	42	6.333	0
3123	6	12	4	F17AG	F17AG	81	80	44	44	6	37	6	0
3123	6	1	5	GAL1	GAL1	220	219	59	60	10	161	15.9	0
3123	6	2	5	GAL1	GAL1	205	194	44	44	6	161	25	0
3123	6	3	5	GAL1-S	GAL1-S	45	45	42	43	6	3	0.333	0
3123	6	4	5	GAL1-S	GAL1-S	42	44	43	43	5	-1	0.2	0
3123	6	5	5	GAL2	GAL2	77	93	43	43	5	34	10	0
3123	6	6	5	GAL2	GAL2	76	138	42	43	5	34	19	0
3123	6	7	5	GAL3	GAL3	714	634	42	43	5	672	118.2	0
3123	6	8	5	GAL3	GAL3	684	609	44	44	6	640	94.167	0
3123	6	9	5	GAL3C-S	GAL3C-S	192	175	46	49	54	146	2.333	0
3123	6	10	5	GAL3C-S	GAL3C-S	180	161	44	46	16	136	7.188	0
3123	6	11	5	GAL7-S	GAL7-S	51	51	47	47	8	4	0.5	0
3123	6	12	5	GAL7-S	GAL7-S	50	51	44	44	6	6	1.167	0
3123	6	1	6	GAL9	GAL9	419	409	50	50	7	369	51.286	0
3123	6	2	6	GAL9	GAL9	459	431	44	45	14	415	27.571	0
3123	6	3	6	GNA	GNA	15372	14590	45	136	929	15327	15.559	0
3123	6	4	6	GNA	GNA	12933	12701	45	129	824	12888	15.257	0
3123	6	5	6	GRFT	GRFT	5602	5313	43	43	5	5559	1054	0
3123	6	6	6	GRFT	GRFT	5511	5155	44	44	7	5467	730.143	0
3123	6	7	6	GS-I;?GSL-I	GS-I;?GSL-I	212	197	42	43	6	170	25.667	0
3123	6	8	6	GS-I;?GSL-I	GS-I;?GSL-I	153	139	43	43	5	110	19.2	0
3123	6	9	6	GS-II; GSL-II	GS-II; GSL-II	232	225	43	43	5	189	36.4	0
3123	6	10	6	GS-II; GSL-II	GS-II; GSL-II	226	220	45	46	11	181	15.818	0
3123	6	11	6	HHA; HHL	HHA; HHL	14094	13025	46	46	6	14048	2163.17	0
3123	6	12	6	HHA; HHL	HHA; HHL	14072	13082	44	44	6	14028	2173	0
3123	6	1	7	Jacalin	Jacalin	274	263	45	45	9	229	24.222	0
3123	6	2	7	Jacalin	Jacalin	330	284	45	47	25	285	9.48	0
3123	6	3	7	LBA	LBA	85	80	43	43	5	42	7.4	0
3123	6	4	7	LBA	LBA	326	361	44	45	18	282	17.556	0
3123	6	5	7	LcH A	LcH A	362	347	43	43	5	319	60.8	0
3123	6	6	7	LcH A	LcH A	275	274	43	43	5	232	46.2	0
3123	6	7	7	LEA	LEA	226	229	44	44	5	182	37	0
3123	6	8	7	LEA	LEA	246	237	44	44	6	202	32.167	0
3123	6	9	7	LENTIL	LENTIL	125	117	43	45	10	82	7.2	0
3123	6	10	7	LENTIL	LENTIL	128	118	45	47	15	83	4.733	0
3123	6	11	7	Lotus	Lotus	61	219	44	45	5	17	34.8	0
3123	6	12	7	Lotus	Lotus	66	227	44	54	74	22	2.338	0
3123	6	1	8	LSL-N	LSL-N	145	132	42	43	5	103	17.8	0
3123	6	2	8	LSL-N	LSL-N	128	115	42	42	5	86	14.6	0
3123	6	3	8	MAA; MAL	MAA; MAL	3361	2887	43	74	991	3318	2.839	0
3123	6	4	8	MAA; MAL	MAA; MAL	3382	2755	43	44	13	3339	208.538	0
3123	6	5	8	MALECTIN	MALECTIN	125	107	42	43	11	83	5.818	0
3123	6	6	8	MALECTIN	MALECTIN	116	102	42	43	10	74	5.9	0
3123	6	7	8	MOA	MOA	402	378	43	48	22	359	15	0
3123	6	8	8	MOA	MOA	396	370	42	42	8	354	41	0
3123	6	9	8	MPL; MPA	MPL; MPA	205	184	42	43	6	163	23.5	0
3123	6	10	8	MPL; MPA	MPL; MPA	211	191	43	43	6	168	24.667	0
3123	6	11	8	NPA	NPA	4344	4458	43	44	12	4301	367.833	0
3123	6	12	8	NPA	NPA	4570	4614	45	53	137	4525	33.292	0
3123	6	1	9	ORYSATA	ORYSATA	754	693	42	42	5	712	130.2	0
3123	6	2	9	ORYSATA	ORYSATA	885	772	43	43	5	842	145.8	0
3123	6	3	9	PA-IIL	PA-IIL	141	226	42	42	7	99	26.286	0
3123	6	4	9	PA-IIL	PA-IIL	252	267	41	41	5	211	45.2	0
3123	6	5	9	PA-IL	PA-IL	66	67	41	42	5	25	5	0
3123	6	6	9	PA-IL	PA-IL	64	63	41	44	41	23	0.463	0
3123	6	7	9	PALa	PALa	262	402	42	42	5	220	72	0
3123	6	8	9	PALa	PALa	298	390	44	78	119	254	2.622	0
3123	6	9	9	PHA-E	PHA-E	1594	1477	98	113	79	1496	17.266	0
3123	6	10	9	PHA-E	PHA-E	1597	1486	43	43	6	1554	240.5	0
3123	6	11	9	PHA-L	PHA-L	555	534	42	43	5	513	98.2	0
3123	6	12	9	PHA-L	PHA-L	536	504	44	44	7	492	65.714	0
3123	6	1	10	PHA-P	PHA-P	156	163	42	43	6	114	20	0
3123	6	2	10	PHA-P	PHA-P	149	145	42	42	6	107	17.167	0
3123	6	3	10	PNA	PNA	167	177	42	42	5	125	27	0
3123	6	4	10	PNA	PNA	165	167	41	44	40	124	3.075	0
3123	6	5	10	PPL	PPL	75	83	41	42	10	34	4.1	0
3123	6	6	10	PPL	PPL	85	86	42	44	40	43	1.05	0
3123	6	7	10	PSA/PEA	PSA/PEA	201	207	42	42	5	159	33	0
3123	6	8	10	PSA/PEA	PSA/PEA	195	210	42	49	26	153	6.192	0
3123	6	9	10	PSL1A	PSL1A	21472	23512	45	68	52	21427	450.846	0
3123	6	10	10	PSL1A	PSL1A	19504	22458	42	42	5	19462	4483.2	0
3123	6	11	10	PTL	PTL	55	55	43	43	5	12	2.4	0
3123	6	12	10	PTL	PTL	56	56	44	49	138	12	0.051	0
3123	6	1	11	RS-FUC	RS-FUC	276	245	42	42	5	234	40.6	0
3123	6	2	11	RS-FUC	RS-FUC	290	253	42	42	6	248	35.167	0
3123	6	3	11	SAMB	SAMB	10451	9929	44	84	134	10407	73.47	0
3123	6	4	11	SAMB	SAMB	11191	10289	44	96	180	11147	56.628	0
3123	6	5	11	SBA	SBA	120	265	42	42	5	78	44.6	0
3123	6	6	11	SBA	SBA	109	138	42	42	5	67	19.2	0
3123	6	7	11	SJA	SJA	62	61	42	42	6	20	3.167	0
3123	6	8	11	SJA	SJA	64	65	41	42	5	23	4.6	0
3123	6	9	11	SNA-I	SNA-I	595	639	42	42	5	553	119.4	0
3123	6	10	11	SNA-I	SNA-I	876	719	42	42	5	834	135.4	0
3123	6	11	11	SNA-II	SNA-II	72	77	42	44	37	30	0.892	0
3123	6	12	11	SNA-II	SNA-II	70	73	45	46	42	25	0.643	0
3123	6	1	12	STL	STL	932	877	42	42	5	890	167	0
3123	6	2	12	STL	STL	917	875	42	42	13	875	64.077	0
3123	6	3	12	UDA	UDA	89	86	43	45	10	46	4.1	0
3123	6	4	12	UDA	UDA	94	90	43	45	11	51	4.091	0
3123	6	5	12	UEA I	UEA I	568	547	42	45	120	526	4.183	0
3123	6	6	12	UEA I	UEA I	580	554	42	42	5	538	102.4	0
3123	6	7	12	UEA-II	UEA-II	109	106	41	42	5	68	12.8	0
3123	6	8	12	UEA-II	UEA-II	102	103	42	42	5	60	12.2	0
3123	6	9	12	VFA	VFA	96	134	42	42	5	54	18.4	0
3123	6	10	12	VFA	VFA	89	116	42	43	25	47	2.92	0
3123	6	11	12	VVA	VVA	5292	5037	44	49	59	5248	84.542	0
3123	6	12	12	VVA	VVA	4871	4666	45	46	7	4826	660	0
3123	6	1	13	WFA	WFA	83	80	42	43	6	41	6.167	0
3123	6	2	13	WFA	WFA	86	93	42	43	14	44	3.571	0
3123	6	3	13	WGA	WGA	119	186	41	42	24	78	6	0
3123	6	4	13	WGA	WGA	157	258	41	42	23	116	9.391	0
3123	6	5	13	NEG	NEG	40	174	42	42	5	-2	26.4	0
3123	6	6	13	NEG	NEG	38	192	42	42	5	-4	30	0
3123	6	7	13	NEG	NEG	40	155	42	42	5	-2	22.6	0
3123	6	8	13	NEG	NEG	42	142	42	43	5	0	19.8	0
3123	6	9	13	POS2	POS2	2885	4270	43	43	11	2842	384.273	0
3123	6	10	13	POS2	POS2	3248	4860	43	45	53	3205	90.849	0
3123	6	11	13	POS1	POS1	17405	14423	44	44	5	17361	2875.8	0
3123	6	12	13	POS1	POS1	19577	16493	47	48	6	19530	2740.83	0
2656	7	1	1	POS1	POS1	17124	15417	45	45	7	17079	2196	0
2656	7	2	1	POS1	POS1	18792	16438	45	45	6	18747	2732.17	0
2656	7	3	1	POS2	POS2	2732	3355	45	50	130	2687	25.423	0
2656	7	4	1	POS2	POS2	2801	3736	44	58	272	2757	13.522	0
2656	7	5	1	NEG	NEG	40	45	45	47	33	-5	-0.061	0
2656	7	6	1	NEG	NEG	38	43	45	45	7	-7	-0.286	0
2656	7	7	1	NEG	NEG	40	44	45	46	9	-5	-0.222	0
2656	7	8	1	NEG	NEG	45	48	48	48	8	-3	0	0
2656	7	9	1	AAA	AAA	117	135	48	48	7	69	12.429	0
2656	7	10	1	AAA	AAA	123	134	48	49	6	75	14.167	0
2656	7	11	1	AAL	AAL	378	345	49	50	6	329	49.167	0
2656	7	12	1	AAL	AAL	394	360	52	52	7	342	44	0
2656	7	1	2	ACG	ACG	671	572	48	49	17	623	30.765	0
2656	7	2	2	ACG	ACG	617	528	47	49	42	570	11.405	0
2656	7	3	2	ACL	ACL	248	246	46	49	75	202	2.627	0
2656	7	4	2	ACL	ACL	243	250	46	46	7	197	29.143	0
2656	7	5	2	ASA	ASA	4033	4100	49	49	7	3984	578.714	0
2656	7	6	2	ASA	ASA	4469	4393	47	48	7	4422	620.714	0
[truncated: 1,074 more rows]
