# Supplementary material for: Altered profile of glycosylated proteins in serum samples obtained from patients with Hashimoto′s thyroiditis following depletion of highly abundant proteins
Source: Frontiers journal article supplement (doi:10.3389/fimmu.2023.1182842), 2023-06-30
Supplement: Data_Sheet_1.ZIP [file Up regulation_GO.xlsx]

## Sheet: GO_BP
ID

## Sheet: GO_CC
ID

## Sheet: GO_MF
ID
