# Supplementary material for: Altered profile of glycosylated proteins in serum samples obtained from patients with Hashimoto′s thyroiditis following depletion of highly abundant proteins
Source: Frontiers journal article supplement (doi:10.3389/fimmu.2023.1182842), 2023-06-30
Supplement: Data_Sheet_1.ZIP [file Up regulation_KEGG_Pathway.xlsx]

## Sheet: KEGG_Pathway
ID	Description	GeneRatio	BgRatio	pvalue	p.adjust	qvalue	geneID	Count
hsa05150	Staphylococcus aureus infection	15/55	96/8115	3.2442e-17	3.82816e-15	3.5174e-15	C4A/C4B/KRT23/KRT13/MASP1/CFD/KRT14/DSG1/FGG/KRT17/KRT10/KRT16/KRT9/MASP2/CAMP	15
hsa04610	Complement and coagulation cascades	11/55	85/8115	7.04922e-12	4.15904e-10	3.82142e-10	C4A/C4B/FGB/MASP1/CFD/FGG/MASP2/F12/C4BPB/CFHR5/FGA	11
hsa04915	Estrogen signaling pathway	10/55	138/8115	2.2228e-08	8.74302e-07	8.03328e-07	KRT23/KRT13/HSPA6/KRT14/CALML5/KRT17/KRT10/KRT16/CTSD/KRT9	10
hsa05171	Coronavirus disease - COVID-19	8/55	232/8115	0.000150902	0.00356129	0.00327219	C4A/C4B/FGB/MASP1/CFD/FGG/MASP2/FGA	8
hsa01100	Metabolic pathways	8/55	1534/8115	0.842007	0.849204	0.780267	ARG1/CAT/ASAH1/ALOX12B/ENO1/TPI1/GAPDH/PKM	8
hsa01230	Biosynthesis of amino acids	5/55	75/8115	0.000143017	0.00356129	0.00327219	ARG1/ENO1/TPI1/GAPDH/PKM	5
hsa01200	Carbon metabolism	5/55	115/8115	0.00103595	0.0177829	0.0163393	CAT/ENO1/TPI1/GAPDH/PKM	5
hsa04142	Lysosome	5/55	132/8115	0.00191391	0.0250935	0.0230565	ASAH1/PSAPL1/PSAP/GM2A/CTSD	5
hsa00010	Glycolysis / Gluconeogenesis	4/55	67/8115	0.00105492	0.0177829	0.0163393	ENO1/TPI1/GAPDH/PKM	4
hsa05133	Pertussis	4/55	76/8115	0.00168804	0.0248986	0.0228774	C4A/C4B/CALML5/C4BPB	4
hsa04613	Neutrophil extracellular trap formation	4/55	190/8115	0.0393284	0.309383	0.284268	FGB/FGG/CAMP/FGA	4
hsa05132	Salmonella infection	4/55	249/8115	0.0876202	0.568329	0.522194	TXN/GAPDH/AHNAK/ANXA2	4
hsa05012	Parkinson disease	4/55	266/8115	0.105248	0.597526	0.54902	TXN/PSMA6/PSMA1/CALML5	4
hsa05014	Amyotrophic lateral sclerosis	4/55	364/8115	0.232306	0.753756	0.692568	CAT/PSMA6/PSMA1/ANG	4
hsa05010	Alzheimer disease	4/55	384/8115	0.262053	0.753756	0.692568	PSMA6/GAPDH/PSMA1/CALML5	4
hsa05022	Pathways of neurodegeneration - multiple diseases	4/55	476/8115	0.404899	0.781365	0.717936	CAT/PSMA6/PSMA1/CALML5	4
hsa00600	Sphingolipid metabolism	3/55	49/8115	0.00435446	0.0494568	0.045442	ASAH1/PSAPL1/PSAP	3
hsa04979	Cholesterol metabolism	3/55	50/8115	0.00461038	0.0494568	0.045442	APOC2/APOA2/APOC1	3
hsa05146	Amoebiasis	3/55	102/8115	0.031574	0.309383	0.284268	ARG1/SERPINB4/PRDX1	3
hsa04066	HIF-1 signaling pathway	3/55	109/8115	0.0373562	0.309383	0.284268	ENO1/TFRC/GAPDH	3
hsa04611	Platelet activation	3/55	124/8115	0.0514416	0.379382	0.348585	FGB/FGG/FGA	3
hsa05152	Tuberculosis	3/55	180/8115	0.122326	0.65611	0.602848	CALML5/CTSD/CAMP	3
hsa04144	Endocytosis	3/55	251/8115	0.24151	0.753756	0.692568	HSPA6/TFRC/CHMP4A	3
hsa05020	Prion disease	3/55	273/8115	0.281981	0.753756	0.692568	PSMA6/HSPA6/PSMA1	3
hsa05200	Pathways in cancer	3/55	531/8115	0.707571	0.80868	0.743033	IGF2/JUP/CALML5	3
hsa03050	Proteasome	2/55	46/8115	0.0386014	0.309383	0.284268	PSMA6/PSMA1	2
hsa04213	Longevity regulating pathway - multiple species	2/55	62/8115	0.0658817	0.457297	0.420174	CAT/HSPA6	2
hsa03320	PPAR signaling pathway	2/55	75/8115	0.0915106	0.568329	0.522194	FABP5/APOA2	2
hsa04146	Peroxisome	2/55	82/8115	0.106339	0.597526	0.54902	CAT/PRDX1	2
hsa04970	Salivary secretion	2/55	93/8115	0.13082	0.671162	0.616679	CALML5/CAMP	2
hsa04061	Viral protein interaction with cytokine and cytokine receptor	2/55	100/8115	0.14702	0.693935	0.637603	PPBP/PF4	2
hsa04922	Glucagon signaling pathway	2/55	107/8115	0.163613	0.742553	0.682274	CALML5/PKM	2
hsa04071	Sphingolipid signaling pathway	2/55	119/8115	0.192775	0.753756	0.692568	ASAH1/CTSD	2
hsa05322	Systemic lupus erythematosus	2/55	136/8115	0.235111	0.753756	0.692568	C4A/C4B	2
hsa05418	Fluid shear stress and atherosclerosis	2/55	139/8115	0.242656	0.753756	0.692568	TXN/CALML5	2
hsa04936	Alcoholic liver disease	2/55	142/8115	0.250214	0.753756	0.692568	C4A/C4B	2
hsa05017	Spinocerebellar ataxia	2/55	143/8115	0.252736	0.753756	0.692568	PSMA6/PSMA1	2
hsa04145	Phagosome	2/55	152/8115	0.275454	0.753756	0.692568	TFRC/THBS4	2
hsa04621	NOD-like receptor signaling pathway	2/55	184/8115	0.3556	0.781365	0.717936	TXN/CAMP	2
hsa04062	Chemokine signaling pathway	2/55	192/8115	0.375245	0.781365	0.717936	PPBP/PF4	2
hsa05415	Diabetic cardiomyopathy	2/55	203/8115	0.401871	0.781365	0.717936	GAPDH/CTSD	2
hsa05417	Lipid and atherosclerosis	2/55	215/8115	0.430326	0.793413	0.729006	HSPA6/CALML5	2
hsa04014	Ras signaling pathway	2/55	232/8115	0.469428	0.795372	0.730806	IGF2/CALML5	2
hsa04010	MAPK signaling pathway	2/55	294/8115	0.597865	0.80006	0.735113	HSPA6/IGF2	2
hsa04060	Cytokine-cytokine receptor interaction	2/55	295/8115	0.59974	0.80006	0.735113	PPBP/PF4	2
hsa05016	Huntington disease	2/55	306/8115	0.619951	0.80006	0.735113	PSMA6/PSMA1	2
hsa05165	Human papillomavirus infection	2/55	331/8115	0.663024	0.80006	0.735113	THBS4/PKM	2
hsa04151	PI3K-Akt signaling pathway	2/55	354/8115	0.6992	0.80868	0.743033	THBS4/IGF2	2
hsa00220	Arginine biosynthesis	1/55	22/8115	0.139127	0.684043	0.628514	ARG1	1
hsa04744	Phototransduction	1/55	29/8115	0.17927	0.753756	0.692568	CALML5	1
hsa00630	Glyoxylate and dicarboxylate metabolism	1/55	30/8115	0.184852	0.753756	0.692568	CAT	1
hsa00051	Fructose and mannose metabolism	1/55	33/8115	0.201377	0.753756	0.692568	TPI1	1
hsa04216	Ferroptosis	1/55	41/8115	0.243852	0.753756	0.692568	TFRC	1
hsa00380	Tryptophan metabolism	1/55	42/8115	0.249003	0.753756	0.692568	CAT	1
hsa04930	Type II diabetes mellitus	1/55	46/8115	0.269264	0.753756	0.692568	PKM	1
hsa00620	Pyruvate metabolism	1/55	47/8115	0.274245	0.753756	0.692568	PKM	1
hsa04672	Intestinal immune network for IgA production	1/55	49/8115	0.284107	0.753756	0.692568	PIGR	1
hsa05144	Malaria	1/55	50/8115	0.288988	0.753756	0.692568	THBS4	1
hsa00330	Arginine and proline metabolism	1/55	51/8115	0.293837	0.753756	0.692568	ARG1	1
hsa05134	Legionellosis	1/55	57/8115	0.322256	0.781365	0.717936	HSPA6	1
hsa00590	Arachidonic acid metabolism	1/55	61/8115	0.340574	0.781365	0.717936	ALOX12B	1
hsa04720	Long-term potentiation	1/55	67/8115	0.367144	0.781365	0.717936	CALML5	1
hsa05221	Acute myeloid leukemia	1/55	67/8115	0.367144	0.781365	0.717936	JUP	1
hsa04924	Renin secretion	1/55	69/8115	0.375765	0.781365	0.717936	CALML5	1
hsa05031	Amphetamine addiction	1/55	69/8115	0.375765	0.781365	0.717936	CALML5	1
hsa05230	Central carbon metabolism in cancer	1/55	70/8115	0.380032	0.781365	0.717936	PKM	1
hsa00562	Inositol phosphate metabolism	1/55	73/8115	0.392662	0.781365	0.717936	TPI1	1
hsa05214	Glioma	1/55	75/8115	0.400942	0.781365	0.717936	CALML5	1
hsa04971	Gastric acid secretion	1/55	76/8115	0.40504	0.781365	0.717936	CALML5	1
hsa05412	Arrhythmogenic right ventricular cardiomyopathy	1/55	77/8115	0.40911	0.781365	0.717936	JUP	1
hsa04612	Antigen processing and presentation	1/55	78/8115	0.413153	0.781365	0.717936	HSPA6	1
hsa03018	RNA degradation	1/55	79/8115	0.417169	0.781365	0.717936	ENO1	1
hsa04512	ECM-receptor interaction	1/55	88/8115	0.45212	0.795372	0.730806	THBS4	1
hsa04211	Longevity regulating pathway	1/55	89/8115	0.455874	0.795372	0.730806	CAT	1
hsa04912	GnRH signaling pathway	1/55	93/8115	0.470639	0.795372	0.730806	CALML5	1
hsa04070	Phosphatidylinositol signaling system	1/55	97/8115	0.485011	0.795372	0.730806	CALML5	1
hsa04713	Circadian entrainment	1/55	97/8115	0.485011	0.795372	0.730806	CALML5	1
hsa04750	Inflammatory mediator regulation of TRP channels	1/55	98/8115	0.488543	0.795372	0.730806	CALML5	1
hsa04925	Aldosterone synthesis and secretion	1/55	98/8115	0.488543	0.795372	0.730806	CALML5	1
hsa04640	Hematopoietic cell lineage	1/55	99/8115	0.492052	0.795372	0.730806	TFRC	1
hsa04916	Melanogenesis	1/55	101/8115	0.498999	0.795701	0.731108	CALML5	1
hsa04625	C-type lectin receptor signaling pathway	1/55	104/8115	0.509245	0.80006	0.735113	CALML5	1
hsa05145	Toxoplasmosis	1/55	112/8115	0.535572	0.80006	0.735113	HSPA6	1
hsa04726	Serotonergic synapse	1/55	115/8115	0.545082	0.80006	0.735113	ALOX12B	1
hsa04722	Neurotrophin signaling pathway	1/55	119/8115	0.557466	0.80006	0.735113	CALML5	1
hsa04068	FoxO signaling pathway	1/55	131/8115	0.592666	0.80006	0.735113	CAT	1
hsa04114	Oocyte meiosis	1/55	131/8115	0.592666	0.80006	0.735113	CALML5	1
hsa04728	Dopaminergic synapse	1/55	132/8115	0.595472	0.80006	0.735113	CALML5	1
hsa04270	Vascular smooth muscle contraction	1/55	134/8115	0.601028	0.80006	0.735113	CALML5	1
hsa04210	Apoptosis	1/55	136/8115	0.606508	0.80006	0.735113	CTSD	1
hsa04910	Insulin signaling pathway	1/55	137/8115	0.60922	0.80006	0.735113	CALML5	1
hsa04371	Apelin signaling pathway	1/55	139/8115	0.61459	0.80006	0.735113	CALML5	1
hsa05162	Measles	1/55	139/8115	0.61459	0.80006	0.735113	HSPA6	1
hsa04140	Autophagy - animal	1/55	141/8115	0.619887	0.80006	0.735113	CTSD	1
hsa03040	Spliceosome	1/55	147/8115	0.635354	0.80006	0.735113	HSPA6	1
hsa04514	Cell adhesion molecules	1/55	149/8115	0.640371	0.80006	0.735113	SELL	1
hsa05226	Gastric cancer	1/55	149/8115	0.640371	0.80006	0.735113	JUP	1
hsa04261	Adrenergic signaling in cardiomyocytes	1/55	150/8115	0.642854	0.80006	0.735113	CALML5	1
hsa04921	Oxytocin signaling pathway	1/55	154/8115	0.652619	0.80006	0.735113	CALML5	1
hsa04218	Cellular senescence	1/55	156/8115	0.657403	0.80006	0.735113	CALML5	1
hsa04217	Necroptosis	1/55	159/8115	0.664457	0.80006	0.735113	CHMP4A	1
hsa04022	cGMP-PKG signaling pathway	1/55	167/8115	0.682579	0.807629	0.742068	CALML5	1
hsa05225	Hepatocellular carcinoma	1/55	168/8115	0.684775	0.807629	0.742068	IGF2	1
hsa04141	Protein processing in endoplasmic reticulum	1/55	171/8115	0.691276	0.807629	0.742068	HSPA6	1
hsa05034	Alcoholism	1/55	187/8115	0.723784	0.80868	0.743033	CALML5	1
hsa05202	Transcriptional misregulation in cancer	1/55	193/8115	0.735088	0.80868	0.743033	JUP	1
hsa05167	Kaposi sarcoma-associated herpesvirus infection	1/55	194/8115	0.736927	0.80868	0.743033	CALML5	1
hsa05130	Pathogenic Escherichia coli infection	1/55	197/8115	0.74237	0.80868	0.743033	GAPDH	1
hsa04510	Focal adhesion	1/55	201/8115	0.749455	0.80868	0.743033	THBS4	1
hsa05203	Viral carcinogenesis	1/55	204/8115	0.754643	0.80868	0.743033	PKM	1
hsa05205	Proteoglycans in cancer	1/55	205/8115	0.756349	0.80868	0.743033	IGF2	1
hsa04015	Rap1 signaling pathway	1/55	210/8115	0.764705	0.80868	0.743033	CALML5	1
hsa05170	Human immunodeficiency virus 1 infection	1/55	212/8115	0.767968	0.80868	0.743033	CALML5	1
hsa04024	cAMP signaling pathway	1/55	221/8115	0.78211	0.80868	0.743033	CALML5	1
hsa05208	Chemical carcinogenesis - reactive oxygen species	1/55	223/8115	0.785136	0.80868	0.743033	CAT	1
hsa05163	Human cytomegalovirus infection	1/55	225/8115	0.78812	0.80868	0.743033	CALML5	1
hsa04020	Calcium signaling pathway	1/55	240/8115	0.809244	0.823196	0.756371	CALML5	1
hsa04740	Olfactory transduction	1/55	440/8115	0.953883	0.953883	0.876449	CALML5	1
