# Supplementary material for: Altered profile of glycosylated proteins in serum samples obtained from patients with Hashimoto′s thyroiditis following depletion of highly abundant proteins
Source: Front Immunol. 2023 Jun 30;14:1182842. doi: 10.3389/fimmu.2023.1182842 (PMC10348014; doi:10.3389/fimmu.2023.1182842)
Supplement: Supplementary file 2 [file Table_1.xlsx]

## Sheet: HTvsHC
Potential VVA binding glycoproteins analysed by mass spectrometry
Accession	Gene Symbol	exp-abundance	con-abundance	ratio
Q9C075	KRT23	61853576	15661.1	3949.5
P02655	APOC2	1.40344e+07	15661.1	896.131
Q01469	FABP5	13013595	15661.1	830.949
P02788	LTF	1.27477e+07	15661.1	813.97
P02675	FGB	4.16344e+06	15661.1	265.846
P05089	ARG1	3.35628e+06	15661.1	214.306
P12273	PIP	933728	15661.1	59.6207
Q6UWP8	SBSN	775943	15661.1	49.5458
P06733	ENO1	699015	15661.1	44.6338
P17066	HSPA6	619173	15661.1	39.5357
P02786	TFRC	605885	15661.1	38.6872
P0C0L4	C4A	3.82403e+08	15661.1	24417.4
A0A075B6R2	IGHV4-4	115775072	15661.1	7392.51
A0M8Q6	IGLC7	36700956	15661.1	2343.44
Q5T750	XP32	2.74563e+07	15661.1	1753.15
P48668	KRT6C	2.40855e+07	15661.1	1537.92
A0A0C4DH38	IGHV5-51	1.69428e+07	15661.1	1081.84
A0A0B4J1Y9	IGHV3-72	7.71602e+06	15661.1	492.686
P31944	CASP14	6.49126e+06	15661.1	414.482
Q13867	BLMH	5.98412e+06	15661.1	382.1
P23083	IGHV1-2	5.59679e+06	15661.1	357.368
P10599	TXN	5.18606e+06	15661.1	331.142
A0A075B6I0	IGLV8-61	4.13113e+06	15661.1	263.782
A0A075B6I4	IGLV10-54	3703418	15661.1	236.472
P01040	CSTA	3.29602e+06	15661.1	210.458
P80748	IGLV3-21	3.26415e+06	15661.1	208.424
P13646	KRT13	3.18268e+06	15661.1	203.222
A0A0C4DH34	IGHV4-28	2636623	15661.1	168.355
P04040	CAT	2.54257e+06	15661.1	162.349
P60900	PSMA6	2.22458e+06	15661.1	142.045
Q6ZVX7	NCCRP1	2.18202e+06	15661.1	139.327
Q15517	CDSN	2.04998e+06	15661.1	130.896
Q13510	ASAH1	1802551	15661.1	115.097
P48594	SERPINB4	2.59973e+07	263551	98.6421
P12035	KRT3	1.4714e+06	15661.1	93.9523
O75342	ALOX12B	962559	15661.1	61.4617
P48740	MASP1	854405	15661.1	54.5558
Q9UBC9	SPRR3	776365	15661.1	49.5727
P55056	APOC4	725524	15661.1	46.3264
Q86YZ3	HRNR	1.66801e+08	3.78981e+06	44.0131
Q6NUJ1	PSAPL1	658020	15661.1	42.0161
P60174	TPI1	610587	15661.1	38.9874
P01833	PIGR	545752	15661.1	34.8475
P35443	THBS4	524752	15661.1	33.5067
P04406	GAPDH	519208	15661.1	33.1527
Q9HCY8	S100A14	467051	15661.1	29.8223
Q6KB66	KRT80	1.44769e+07	487720	29.6828
Q14956	GPNMB	397128	15661.1	25.3576
P07602	PSAP	391759	15661.1	25.0147
Q5T749	KPRP	1.05643e+08	4.28221e+06	24.6703
P17900	GM2A	383431	15661.1	24.483
P01704	IGLV2-14	364465	15661.1	23.2719
P00746	CFD	351309	15661.1	22.4319
Q8WVV4	POF1B	338306	15661.1	21.6016
Q9BYJ1	ALOXE3	335849	15661.1	21.4448
P01344	IGF2	333360	15661.1	21.2859
P01706	IGLV2-11	306691	15661.1	19.583
P01877	IGHA2	6.90295e+06	367931	18.7615
Q09666	AHNAK	277089	15661.1	17.6928
P14151	SELL	251294	15661.1	16.0457
A8K2U0	A2ML1	247114	15661.1	15.7788
P14923	JUP	2.78909e+07	1.95046e+06	14.2996
P22735	TGM1	6.02096e+06	441368	13.6416
P25786	PSMA1	192013	15661.1	12.2605
Q8IWZ3	ANKHD1	187239	15661.1	11.9556
Q08554	DSC1	9.96087e+06	844157	11.7998
P02533	KRT14	3050723742	2.66099e+08	11.4646
Q9NZT1	CALML5	3761622	339834	11.069
Q96P63	SERPINB12	3.51181e+06	346120	10.1462
P02538	KRT6A	1.1485e+09	1.13758e+08	10.096
Q02413	DSG1	2.36452e+07	2.40147e+06	9.84618
P13647	KRT5	2.21949e+08	2.34558e+07	9.46243
Q8N1N4	KRT78	9.75804e+06	1.04047e+06	9.37853
P05452	CLEC3B	3.73091e+06	405464	9.20159
P02679	FGG	5.05735e+06	563866	8.96907
O75131	CPNE3	135940	15661.1	8.68009
Q5D862	FLG2	2.38624e+07	2.81807e+06	8.46767
Q04695	KRT17	4.80914e+07	5.77999e+06	8.32034
P13645	KRT10	3.90512e+09	4.93871e+08	7.90717
P02652	APOA2	177470098	24703261	7.18408
Q9BYE4	SPRR2G	2.60581e+06	372329	6.99868
Q7Z794	KRT77	8.83616e+07	1.26799e+07	6.96864
P04264	KRT1	9.33169e+09	1.37695e+09	6.77706
Q13835	PKP1	7.82255e+06	1.16702e+06	6.70302
P08779	KRT16	2.23427e+08	3.35991e+07	6.64979
P07339	CTSD	1.82529e+06	292717	6.23568
P04259	KRT6B	23691670	3.89329e+06	6.08525
P35527	KRT9	1.99946e+09	3.53007e+08	5.6641
O00187	MASP2	1.28181e+07	2.28154e+06	5.61818
P35908	KRT2	1.44339e+09	2.589e+08	5.5751
Q06830	PRDX1	1.51679e+06	327624	4.62966
Q7RTS7	KRT74	3.26366e+07	7.20658e+06	4.52872
A2NJV5	IGKV2-29	1.03982e+07	2.38158e+06	4.3661
P81605	DCD	1.08537e+07	2.60826e+06	4.1613
P25311	AZGP1	6.57612e+06	1.69283e+06	3.8847
P02775	PPBP	47395059	1.22419e+07	3.87156
P07355	ANXA2	7.00008e+06	2.00941e+06	3.48364
P14618	PKM	7.45575e+06	2173418	3.43043
P00748	F12	3.36473e+07	1.05016e+07	3.20401
Q08188	TGM3	1.4172e+06	445284	3.18268
P02654	APOC1	1.6924e+07	5.59437e+06	3.02519
P49913	CAMP	4.0383e+06	1.36453e+06	2.95948
P03950	ANG	9.26811e+06	3.40432e+06	2.72246
P20851	C4BPB	7.41531e+06	2.77389e+06	2.67325
P22528	SPRR1B	8.02873e+06	3.04402e+06	2.63754
Q9BY43	CHMP4A	15196697	5831976	2.60575
Q9BXR6	CFHR5	524365	222496	2.35674
P49908	SELENOP	4.88729e+06	2.086e+06	2.3429
O95445	APOM	12799025	5.91656e+06	2.16325
Q16610	ECM1	5.77792e+06	2.81478e+06	2.05271
P02671	FGA	2.01999e+07	9.91256e+06	2.03781
P23142	FBLN1	774135	384660	2.01252
P02776	PF4	387806816	192734329	2.01213
P01780	IGHV3-7	133896820	6.75544e+07	1.98206
P0DJI8	SAA1	1521431	774808	1.96362
P09871	C1S	5.06571e+07	2.71655e+07	1.86476
P00740	F9	3.06621e+06	1.6515e+06	1.85662
P15169	CPN1	1.97765e+06	1.07385e+06	1.84166
Q05639	EEF1A2	4.2939e+06	2.35471e+06	1.82354
P04217	A1BG	5.74312e+06	3.17936e+06	1.80638
P62987	UBA52	1.7933e+06	1.03312e+06	1.7358
P22792	CPN2	1.61034e+06	939289	1.71442
Q03591	CFHR1	11694792	6.84976e+06	1.70733
Q96IY4	CPB2	7.31529e+06	4.49979e+06	1.6257
P05154	SERPINA5	4.10405e+06	2.54155e+06	1.61478
P13671	C6	4.24591e+06	2.69323e+06	1.57651
P26927	MST1	1.10138e+06	699040	1.57556
P61626	LYZ	2985317	1.93953e+06	1.5392
P02649	APOE	3.15305e+08	2.20078e+08	1.4327
P01031	C5	2.18332e+08	1.55104e+08	1.40765
P07358	C8B	9.12928e+06	6.51622e+06	1.40101
Q12805	EFEMP1	991354	740438	1.33888
P04275	VWF	4.54305e+06	3.40248e+06	1.33522
P04114	APOB	1.16388e+09	8.74945e+08	1.33023
O14791	APOL1	2.92157e+07	2.20255e+07	1.32645
P47929	LGALS7	1060649	801824	1.3228
P06681	C2	951142	730311	1.30238
P02749	APOH	6.23526e+07	4.80649e+07	1.29726
P19823	ITIH2	8.01711e+07	6.21941e+07	1.28905
P02747	C1QC	185951664	144590177	1.28606
Q14624	ITIH4	1.36509e+08	1.06201e+08	1.28539
Q96PD5	PGLYRP2	2.54112e+06	2.02465e+06	1.25509
Q9UHG3	PCYOX1	1.46525e+06	1.19759e+06	1.2235
P02768	ALB	5944143169	4.87918e+09	1.21827
P03951	F11	1.71161e+06	1.40988e+06	1.21401
P01042	KNG1	1.26145e+08	1.04223e+08	1.21033
P00488	F13A1	8.91262e+06	7.38894e+06	1.20621
P08603	CFH	1.36659e+08	1.1404e+08	1.19834
P10643	C7	6.92347e+06	5.79937e+06	1.19383
P02765	AHSG	8.00136e+07	6.80367e+07	1.17604
P10720	PF4V1	1.5629e+06	1329021	1.17598
A0A075B6J9	IGLV2-18	979937	835476	1.17291
P20930	FLG	2.54619e+06	2.19618e+06	1.15937
P00751	CFB	7.77562e+07	6.77153e+07	1.14828
A0A0B4J1V6	IGHV3-73	2163958	1.88635e+06	1.14717
O75636	FCN3	1.24872e+07	1.08925e+07	1.14641
P69905	HBA1	4918627	4.32017e+06	1.13853
P04196	HRG	130453648	1.14879e+08	1.13557
A0A0C4DH35	IGHV3-35	7844634	6.91891e+06	1.1338
P01008	SERPINC1	1.32877e+08	1.17844e+08	1.12756
P01742	IGHV1-69	1.33044e+07	1.18081e+07	1.12672
A0A087WW87	IGKV2-40	59671412	53063260	1.12453
P02766	TTR	20505823	1.84728e+07	1.11006
P01701	IGLV1-51	8.04848e+06	7268626	1.10729
P19827	ITIH1	2.09081e+07	1.89432e+07	1.10373
P11597	CETP	870205	799176	1.08888
Q04756	HGFAC	2.71108e+06	2.51455e+06	1.07816
P01602	IGKV1-5	7.96174e+06	7456231	1.0678
P01871	IGHM	1.59691e+09	1.52033e+09	1.05037
P27169	PON1	5.94502e+07	5.66851e+07	1.04878
P04004	VTN	3.59967e+08	3.44809e+08	1.04396
P55103	INHBC	553636	530364	1.04388
P80108	GPLD1	1.36947e+07	1.31426e+07	1.04201
P01857	IGHG1	4.01265e+08	385330245	1.04135
P01024	C3	1.0842e+09	1.04372e+09	1.03878
P12259	F5	6.98965e+06	6.7335e+06	1.03804
B9A064	IGLL5	241175002	232889264	1.03558
P01714	IGLV3-19	3.38758e+06	3.31262e+06	1.02263
P01768	IGHV3-30	2.66377e+07	2.60486e+07	1.02262
P02753	RBP4	5.527e+06	5.40918e+06	1.02178
A0A0A0MRZ8	IGKV3D-11	16362265	16101646	1.01619
P01861	IGHG4	1.24593e+07	12340037	1.00967
Q13103	SPP2	5.22915e+06	5.20971e+06	1.00373
Q02985	CFHR3	15661.1	15661.1	1
A0A0C4DH32	IGHV3-20	15661.1	15661.1	1
P05067	APP	15661.1	15661.1	1
P36980	CFHR2	15661.1	15661.1	1
P07384	CAPN1	15661.1	15661.1	1
Q9NZP8	C1RL	15661.1	15661.1	1
P06310	IGKV2-30	15661.1	15661.1	1
O14773	TPP1	15661.1	15661.1	1
P01593	IGKV1D-33	15661.1	15661.1	1
Q9Y251	HPSE	15661.1	15661.1	1
P05109	S100A8	15661.1	15661.1	1
P02750	LRG1	15661.1	15661.1	1
P05164	MPO	15661.1	15661.1	1
P61204	ARF3	15661.1	15661.1	1
P18206	VCL	15661.1	15661.1	1
A0A0C4DH29	IGHV1-3	15661.1	15661.1	1
P32119	PRDX2	15661.1	15661.1	1
P13929	ENO3	15661.1	15661.1	1
Q9UGM5	FETUB	15661.1	15661.1	1
Q9BYE3	LCE3D	15661.1	15661.1	1
O00391	QSOX1	15661.1	15661.1	1
Q14574	DSC3	15661.1	15661.1	1
P28072	PSMB6	15661.1	15661.1	1
O14633	LCE2B	15661.1	15661.1	1
P35754	GLRX	15661.1	15661.1	1
P42357	HAL	15661.1	15661.1	1
P11279	LAMP1	15661.1	15661.1	1
Q96FJ2	DYNLL2	15661.1	15661.1	1
A4D1P6	WDR91	15661.1	15661.1	1
Q9H8L6	MMRN2	15661.1	15661.1	1
Q14766	LTBP1	15661.1	15661.1	1
P25789	PSMA4	15661.1	15661.1	1
Q9C000	NLRP1	15661.1	15661.1	1
Q8IY17	PNPLA6	15661.1	15661.1	1
P28070	PSMB4	15661.1	15661.1	1
P02656	APOC3	3.45699e+07	34757854	0.994594
P35542	SAA4	3.67428e+07	3.70605e+07	0.991429
P02745	C1QA	1.09312e+07	1.10344e+07	0.990649
A0A075B6K4	IGLV3-10	5.51898e+06	5.57666e+06	0.989658
P02743	APCS	3.94097e+06	3.9843e+06	0.989125
P00450	CP	7.71154e+07	7.9226e+07	0.97336
P35858	IGFALS	5.85744e+06	6.04474e+06	0.969015
P01591	JCHAIN	3.67282e+06	3.79658e+06	0.967401
P02748	C9	1.14418e+07	1.20796e+07	0.947197
P22352	GPX3	1.87046e+06	1.98419e+06	0.942685
P01766	IGHV3-13	932853	996404	0.936219
P01876	IGHA1	4.30267e+08	4.60024e+08	0.935315
P43652	AFM	1997346	2.15192e+06	0.928167
P02746	C1QB	93254587	100987430	0.923428
P01709	IGLV2-8	2.11744e+06	2.2962e+06	0.92215
P06396	GSN	6.98141e+07	7.57525e+07	0.921608
P02751	FN1	1.7739e+09	1.92563e+09	0.921209
P07357	C8A	9.52764e+06	1.04463e+07	0.912063
P05155	SERPING1	48246718	5.31198e+07	0.908263
P01034	CST3	491396	544077	0.903173
P07996	THBS1	9.04312e+07	1.0027e+08	0.901874
P04003	C4BPA	6.94803e+08	7.71114e+08	0.901038
P01859	IGHG2	1.20106e+09	1.33901e+09	0.896976
Q14520	HABP2	3.43452e+07	3.85428e+07	0.891092
P01011	SERPINA3	4.27624e+07	48158457	0.887952
P01009	SERPINA1	1.47493e+09	1.66936e+09	0.883527
P05546	SERPIND1	5.95532e+07	6.81948e+07	0.873281
P00739	HPR	1.07476e+07	1.23519e+07	0.870115
P00734	F2	2.52214e+08	2.9353e+08	0.859246
P15924	DSP	6.89883e+07	8.23406e+07	0.83784
P02790	HPX	1.41149e+08	1.69784e+08	0.831343
P00736	C1R	9.13118e+07	1.11504e+08	0.818912
Q15166	PON3	1.98563e+07	2.43932e+07	0.81401
P04278	SHBG	1.11988e+06	1.37665e+06	0.813488
P02774	GC	6.86287e+07	8.49767e+07	0.807618
Q96KN2	CNDP1	1.95529e+06	2.46887e+06	0.791979
P10909	CLU	1.68288e+09	2.18145e+09	0.771449
P59665	DEFA1	6.11134e+06	7.94814e+06	0.768902
P00738	HP	1.0943e+08	1.42688e+08	0.766923
P02647	APOA1	1.21214e+09	1.58147e+09	0.766461
P33151	CDH5	752309	1.00426e+06	0.749118
P34096	RNASE4	1.26923e+06	1711875	0.741424
A0A075B6I9	IGLV7-46	1.10573e+07	15149073	0.729902
P00747	PLG	2.42417e+08	3.33267e+08	0.727398
P07225	PROS1	7.59692e+07	1.06908e+08	0.710603
P02787	TF	5.01464e+08	7.60496e+08	0.659391
A0A087WSY4	IGHV4-30-2	5.5995e+06	8.52742e+06	0.656646
P68871	HBB	7.38949e+06	1.15115e+07	0.641923
P29622	SERPINA4	2.0145e+06	3.14785e+06	0.63996
P06727	APOA4	4.6864e+07	7.44662e+07	0.629333
P03952	KLKB1	19831636	3.15457e+07	0.628665
P27918	CFP	1.67664e+06	2.70832e+06	0.61907
P00742	F10	2.49094e+06	4.15274e+06	0.59983
P01019	AGT	3.41574e+06	5827267	0.586165
P01834	IGKC	291208585	5.05612e+08	0.575953
Q13790	APOF	2.2119e+06	3.87155e+06	0.571322
P04180	LCAT	945902	1.71945e+06	0.550118
P01023	A2M	2.22235e+08	4.17599e+08	0.532173
Q7L7L0	H2AW	15661.1	31322.3	0.5
P05090	APOD	2.43824e+07	48826432	0.499368
Q08380	LGALS3BP	3.96906e+06	8.35808e+06	0.474877
A0A0J9YX35	IGHV3-64D	2.21795e+06	5.01547e+06	0.442222
P08519	LPA	7232762	1.70995e+07	0.422982
P20742	PZP	802443	1.92559e+06	0.416726
P33908	MAN1A1	1.93655e+06	5.00611e+06	0.386836
P07360	C8G	805435	2.28465e+06	0.352542
O43866	CD5L	2.76744e+07	8.97171e+07	0.308463
P06702	S100A9	1.48422e+06	5.72324e+06	0.259332
P02760	AMBP	5.82651e+06	2.31725e+07	0.25144
P01860	IGHG3	61428195	261374391	0.23502
P05156	CFI	2.03355e+06	8690558	0.233995
Q92954	PRG4	2.12891e+06	1.03803e+07	0.205091
P01624	IGKV3-15	3359290	16720452	0.200909
P60709	ACTB	1.85344e+06	1.08699e+07	0.170511
Q06033	ITIH3	304116	1.89185e+06	0.16075
A0A0C4DH25	IGKV3D-20	5.36716e+06	3.6012e+07	0.149038
P22891	PROZ	15661.1	107589	0.145564
P15153	RAC2	15661.1	194731	0.0804244
Q9NQ79	CRTAC1	1.18915e+06	2.31339e+07	0.0514029
P05543	SERPINA7	15661.1	333665	0.0469366
Q99456	KRT12	15661.1	419372	0.0373442
Q86UP8	GTF2IRD2	15661.1	420510	0.0372431
P62805	H4C1	15661.1	424130	0.0369253
P0DTE1	IGHV3-38-3	15661.1	433327	0.0361416
P58107	EPPK1	15661.1	467094	0.0335289
Q13201	MMRN1	15661.1	487088	0.0321526
P43251	BTD	15661.1	618047	0.0253397
P01717	IGLV3-25	15661.1	645190	0.0242737
Q99969	RARRES2	15661.1	712217	0.0219892
P05160	F13B	15661.1	725953	0.0215732
P36955	SERPINF1	1.33339e+06	6.4062e+07	0.020814
A0A0C4DH26	IGKV6D-41	15661.1	836100	0.0187312
A0A0G2JS06	IGLV5-39	15661.1	970833	0.0161316
A0A0B4J1V0	IGHV3-15	15661.1	1.03529e+06	0.0151273
P18428	LBP	15661.1	1.13923e+06	0.0137471
P04070	PROC	15661.1	1.22711e+06	0.0127626
P55058	PLTP	15661.1	1.23115e+06	0.0127207
P01880	IGHD	15661.1	1.72525e+06	0.00907762
Q8WXW3	PIBF1	15661.1	1.98212e+06	0.00790118
Q16778	H2BC21	15661.1	2.96586e+06	0.00528046
P01700	IGLV1-47	15661.1	3.0028e+06	0.0052155
A0A075B6R9	IGKV2D-24	15661.1	4.11881e+06	0.00380234
P61224	RAP1B	15661.1	4.62015e+06	0.00338974
P22532	SPRR2D	15661.1	5.08863e+06	0.00307767
P0DP04	IGHV3-43D	15661.1	5513941	0.00284028
P08697	SERPINF2	17794712	6378624313	0.00278974
A0A0J9YXX1	IGHV5-10-1	15661.1	7.27981e+06	0.00215131
P06331	IGHV4-34	15661.1	8.3637e+06	0.00187251
P01619	IGKV3-20	15661.1	9209579	0.00170053
P06312	IGKV4-1	15661.1	16346633	0.000958064
P29508	SERPINB3	15661.1	3.41494e+07	0.000458606
P0DOY2	IGLC2	15661.1	65379237	0.000239543
P0C0L5	C4B	15661.1	3.97303e+08	3.94186e-05
